# Supplementary material for: Untargeted metabolomics reveals the inhibition effect of a high-fat diet on colorectal cancer tumorigenesis in obesity-resistant mice via regulating bile acid, glutathione, and glycerophospholipid metabolisms
Source: Royal Society of Chemistry journal article supplement (doi:10.1039/d4fo06132b), 2025-01-01
Supplement: d4fo06132b1.xlsx [file d4fo06132b1.xlsx]

## Sheet: Serum ESI+
CompID	CompMW	MZ	Time	II_serum_QC1	II_serum_QC2	II_serum_QC3	II_serum_QC4	II_serum_QC5	II_serum_QC6	II_serum_QC7	II_serum_QC8	II_HFD_1	II_HFD_2	II_HFD_3	II_HFD_4	II_HFD_5	II_HFD_6	II_LFD_1	II_LFD_2	II_LFD_3	II_LFD_4	II_LFD_5	II_LFD_6
1	55.9564	90.5253	17.1632	4.93199e+07	5.01498e+07	4.94178e+07	4.94735e+07	5.00939e+07	5.06095e+07	5.0947e+07	5.13518e+07	5.18244e+07	5.25501e+07	5.2756e+07	5.23729e+07	5.29018e+07	5.23393e+07	5.20587e+07	5.24948e+07	5.30002e+07	5.3085e+07	5.22574e+07	5.20205e+07
2	59.9996	61.0068	17.1609	5.02894e+06	5.03127e+06	4.94512e+06	4.9244e+06	4.97257e+06	4.85844e+06	4.526e+06	4.57598e+06	4.53226e+06	4.52637e+06	4.46816e+06	4.46458e+06	4.44057e+06	4.61906e+06	4.52184e+06	4.58916e+06	4.51401e+06	4.42274e+06	4.45701e+06	4.56898e+06
3	60.032	61.0393	0.967233	9.92411e+06	1.00547e+07	1.01154e+07	1.01937e+07	1.01363e+07	1.01228e+07	1.02306e+07	1.01448e+07	6.33778e+06	9.89172e+06	5.83637e+06	7.5856e+06	6.00753e+06	6.79133e+06	6.49631e+06	1.74665e+07	1.77539e+07	8.08856e+06	1.31553e+07	9.16315e+06
4	122.032	62.0235	0.758942	195445	195449	180296	185605	182547	201908	192377	188381	355234	247425	270278	267576	280710	212253	251195	109074	181218	255858	121775	158248
5	69.0048	70.0121	17.1617	1.01762e+07	1.01839e+07	1.01009e+07	1.01785e+07	1.01105e+07	1.0204e+07	1.00069e+07	1.00125e+07	1.01066e+07	1.0311e+07	1.02263e+07	1.01793e+07	1.01605e+07	1.03198e+07	1.02063e+07	1.03812e+07	1.02481e+07	1.02456e+07	1.02415e+07	1.01032e+07
6	140.043	71.0288	0.759477	472182	445325	453094	446652	463979	502404	457895	474028	846894	635052	703106	642189	657504	544984	624265	303573	433653	584322	307963	397917
7	71.0732	72.0805	1.03153	3.77593e+06	3.81868e+06	3.86775e+06	3.87948e+06	3.87313e+06	3.88482e+06	3.8628e+06	3.90942e+06	2.60729e+06	2.94701e+06	2.37876e+06	2.69651e+06	2.12427e+06	1.88942e+06	2.3042e+06	8.37246e+06	7.47126e+06	2.67948e+06	3.51288e+06	2.81399e+06
8	71.0733	72.0805	1.15209	3.401e+06	3.45147e+06	3.47578e+06	3.50787e+06	3.49538e+06	3.49581e+06	3.47746e+06	3.52127e+06	2.3831e+06	2.69223e+06	2.15325e+06	2.42317e+06	1.94178e+06	1.71862e+06	2.09618e+06	7.44928e+06	6.66943e+06	2.39694e+06	3.15545e+06	2.57207e+06
9	145.049	73.5316	0.760787	497687	510088	489387	480042	504827	528132	487933	494439	1.01647e+06	685287	771660	731002	746738	586260	702979	317427	487079	658659	323584	404891
10	145.048	73.5314	17.1504	972064	980881	975735	990027	987889	936997	883123	883518	873864	822535	824775	802106	816953	871029	843900	865240	869161	793897	855602	865782
11	73.0888	74.096	17.0771	1.02107e+06	996896	1.01043e+06	1.00612e+06	977204	942643	895429	862873	874515	853370	811198	819545	813789	821717	806060	807784	800765	764825	814270	842435
12	75.0681	76.0754	0.891613	123201	121125	123021	126305	124333	121815	123678	121768	35256	35180.9	31820.2	23524.3	27196	133750	167139	704926	370691	98002.3	244580	63535.5
13	79.0419	80.0492	17.0979	2.81755e+06	2.75075e+06	2.75962e+06	2.75981e+06	2.73664e+06	2.54108e+06	2.41323e+06	2.33956e+06	2.44087e+06	2.27857e+06	2.24103e+06	2.27418e+06	2.27359e+06	2.26624e+06	2.13143e+06	2.24945e+06	2.24873e+06	2.13978e+06	2.18539e+06	2.22825e+06
14	79.9403	80.9476	0.85754	3.12346e+06	3.13442e+06	3.14232e+06	3.12814e+06	3.10599e+06	3.10172e+06	3.13452e+06	3.15442e+06	2.9499e+06	3.0134e+06	2.91099e+06	3.33945e+06	2.31473e+06	3.30953e+06	3.24924e+06	3.19916e+06	3.05952e+06	2.42931e+06	3.43401e+06	3.22111e+06
15	161.025	81.52	17.1613	4.16661e+07	4.15371e+07	4.12057e+07	4.12544e+07	4.09115e+07	3.9903e+07	3.81808e+07	3.71513e+07	3.74125e+07	3.75461e+07	3.6322e+07	3.65271e+07	3.65119e+07	3.76299e+07	3.6936e+07	3.75062e+07	3.70554e+07	3.61428e+07	3.68216e+07	3.7387e+07
16	81.006	82.5368	0.760175	5.13403e+06	5.04774e+06	5.04055e+06	5.00234e+06	4.97149e+06	5.50707e+06	4.91496e+06	5.02125e+06	9.49325e+06	6.91181e+06	7.58701e+06	6.96971e+06	7.26014e+06	5.73515e+06	6.8577e+06	3.22256e+06	4.81293e+06	6.59888e+06	3.3269e+06	4.14219e+06
17	162.029	82.0217	17.1603	2.56667e+06	2.60824e+06	2.58602e+06	2.57709e+06	2.528e+06	2.46563e+06	2.36591e+06	2.31487e+06	2.30331e+06	2.32346e+06	2.25133e+06	2.22304e+06	2.23543e+06	2.36459e+06	2.28677e+06	2.33757e+06	2.27487e+06	2.20858e+06	2.29855e+06	2.25823e+06
18	163.059	82.5368	0.760627	5.13403e+06	5.04774e+06	5.04055e+06	5.00234e+06	4.97149e+06	5.50707e+06	4.91496e+06	5.02125e+06	9.49325e+06	6.91181e+06	7.58701e+06	6.96971e+06	7.26014e+06	5.73515e+06	6.8577e+06	3.22256e+06	4.81293e+06	6.59888e+06	3.3269e+06	4.14219e+06
19	163.059	82.5366	17.1406	2.89806e+06	2.95236e+06	2.89484e+06	2.94996e+06	2.96607e+06	2.93614e+06	2.91011e+06	2.94048e+06	2.98287e+06	3.074e+06	3.02814e+06	2.98398e+06	3.07085e+06	3.0246e+06	3.02727e+06	3.06544e+06	3.09277e+06	3.02901e+06	3.07384e+06	3.01889e+06
20	81.9373	82.9446	0.857272	1.10168e+06	1.11987e+06	1.11698e+06	1.10553e+06	1.11379e+06	1.10186e+06	1.10597e+06	1.1135e+06	1.0542e+06	1.08057e+06	1.03947e+06	1.18862e+06	834193	1.18879e+06	1.13692e+06	1.13106e+06	1.07256e+06	879829	1.21698e+06	1.15498e+06
21	164.06	83.0372	0.760861	661853	650110	635579	627253	631420	674193	623151	649196	1.23327e+06	883781	974294	890567	930854	733770	880263	399289	616674	847091	403557	513121
22	164.059	83.037	17.1412	340547	343178	335349	338151	353414	333282	353881	350859	348918	352038	361415	353350	353761	354635	346009	335400	356486	332575	359960	355109
23	82.0527	83.06	17.1205	780794	767810	753311	749385	762258	695449	679984	670398	655412	645003	645415	638372	658518	636318	641379	628233	618489	615325	614200	631996
24	82.5091	83.5164	17.1613	908995	900659	898080	914696	891780	851988	805308	803287	810322	797440	777328	783976	783646	813133	798831	792710	783006	780477	783789	792116
25	165.057	83.5356	0.760554	776252	766350	770898	762329	758353	851007	740614	782510	1.51746e+06	1.08008e+06	1.18308e+06	1.06349e+06	1.11122e+06	885090	1.05477e+06	485137	729661	1.02891e+06	477639	638525
26	165.056	83.5353	17.1414	386328	404153	370453	404433	401129	387336	382067	405274	412748	400554	405055	392248	424279	420668	399406	402882	419284	408899	409473	394101
27	83.0732	84.0805	0.77846	637731	619001	622345	632790	636972	632229	623581	625027	548811	521652	496511	476548	473382	474364	516642	1.10085e+06	966208	551506	626847	507594
28	83.0732	84.0805	1.84488	3.27096e+06	2.46277e+06	2.83831e+06	2.75156e+06	2.53025e+06	3.27676e+06	2.96185e+06	2.8919e+06	2.64854e+06	3.03332e+06	3.45142e+06	3.88589e+06	2.7877e+06	2.76246e+06	3.08334e+06	3.44535e+06	2.60472e+06	2.86033e+06	3.45567e+06	2.532e+06
29	83.9519	125.986	17.1606	6.60492e+06	6.56473e+06	6.53336e+06	6.47612e+06	6.48918e+06	6.28423e+06	6.09396e+06	6.11894e+06	6.12135e+06	6.28774e+06	6.14962e+06	6.05466e+06	6.14521e+06	6.21499e+06	6.22148e+06	6.21985e+06	6.21095e+06	6.11209e+06	6.12015e+06	6.27109e+06
30	85.0888	86.0961	1.32191	2.61882e+07	2.61457e+07	2.65566e+07	2.67564e+07	2.64577e+07	2.62147e+07	2.61484e+07	2.64504e+07	2.28463e+07	2.19388e+07	2.18478e+07	2.25295e+07	1.996e+07	1.83395e+07	2.02309e+07	3.7994e+07	3.84474e+07	2.37013e+07	2.33285e+07	2.25963e+07
31	85.0889	86.0962	1.39213	2.76746e+07	2.76752e+07	2.81309e+07	2.83137e+07	2.80122e+07	2.77604e+07	2.77082e+07	2.8081e+07	2.39919e+07	2.3151e+07	2.31369e+07	2.38327e+07	2.11136e+07	1.93356e+07	2.13913e+07	4.06324e+07	4.10604e+07	2.51592e+07	2.46506e+07	2.38989e+07
32	86.0365	87.0438	1.24296	462171	456486	490022	471445	463007	472398	482134	473745	224487	449196	534373	783759	806165	590016	730720	208198	187231	699294	330024	733936
33	86.0922	87.0995	1.41728	1.37306e+06	1.35839e+06	1.38072e+06	1.37858e+06	1.34372e+06	1.35248e+06	1.35502e+06	1.3699e+06	1.15962e+06	1.0975e+06	1.10442e+06	1.14752e+06	1.01014e+06	908271	1.00979e+06	2.04231e+06	2.06549e+06	1.2115e+06	1.15504e+06	1.15277e+06
34	88.0007	89.0079	17.1761	1.06476e+06	1.03539e+06	1.01649e+06	1.05373e+06	1.03904e+06	988868	932065	968891	971863	982048	918943	937069	957929	975851	926969	945204	901558	906249	922538	938296
35	176.998	89.5064	7.80676	4.85692e+06	5.07478e+06	5.52535e+06	5.32436e+06	5.22642e+06	5.35902e+06	5.4248e+06	5.30717e+06	5.71859e+06	5.98447e+06	5.4232e+06	6.14894e+06	6.55999e+06	5.13899e+06	5.35091e+06	6.81591e+06	6.56945e+06	5.71719e+06	5.53143e+06	5.22018e+06
36	176.998	89.5064	17.3123	4.29534e+07	4.32099e+07	4.31006e+07	4.30228e+07	4.32028e+07	4.28493e+07	4.16883e+07	4.21648e+07	4.1747e+07	4.24057e+07	4.14247e+07	4.20233e+07	4.23855e+07	4.25637e+07	4.29619e+07	4.28916e+07	4.27967e+07	4.26169e+07	4.25442e+07	4.21834e+07
37	88.4991	89.5064	17.4374	4.43617e+07	4.46325e+07	4.4536e+07	4.4504e+07	4.47425e+07	4.43817e+07	4.3213e+07	4.37501e+07	4.33383e+07	4.39676e+07	4.29562e+07	4.36279e+07	4.39598e+07	4.41567e+07	4.45396e+07	4.45189e+07	4.44098e+07	4.4263e+07	4.40759e+07	4.37902e+07
38	88.4992	89.5064	17.6095	3.81051e+07	3.83005e+07	3.83503e+07	3.84316e+07	3.83274e+07	3.79072e+07	3.74687e+07	3.8115e+07	3.76799e+07	3.77258e+07	3.69121e+07	3.74979e+07	3.80832e+07	3.81306e+07	3.84128e+07	3.8607e+07	3.8519e+07	3.8141e+07	3.81482e+07	3.79205e+07
39	88.4992	89.5064	17.7223	4.50074e+07	4.53216e+07	4.51841e+07	4.52487e+07	4.54787e+07	4.51106e+07	4.42768e+07	4.47531e+07	4.43299e+07	4.48212e+07	4.37774e+07	4.44591e+07	4.47734e+07	4.50333e+07	4.54144e+07	4.53439e+07	4.52336e+07	4.51804e+07	4.49437e+07	4.46333e+07
40	89.0473	90.0546	0.887252	541571	533867	559408	547761	545377	571452	545249	536825	1.05386e+06	557100	670284	512815	678215	535920	664440	347229	426405	764456	551942	568435
41	178.998	90.5065	17.195	9.21619e+06	9.146e+06	9.04219e+06	9.18334e+06	9.27404e+06	9.04884e+06	8.69888e+06	8.69174e+06	8.72253e+06	8.6828e+06	8.48143e+06	8.59474e+06	8.61182e+06	8.75896e+06	8.68812e+06	8.74116e+06	8.67399e+06	8.59301e+06	8.62674e+06	8.71287e+06
42	178.999	90.5066	17.3422	1.0534e+07	1.04347e+07	1.03646e+07	1.04741e+07	1.0608e+07	1.03736e+07	1.00239e+07	1.00104e+07	1.00079e+07	9.99455e+06	9.78225e+06	9.90625e+06	9.94187e+06	1.01029e+07	1.00175e+07	1.00804e+07	1.00202e+07	9.92242e+06	9.98253e+06	1.0072e+07
43	179.036	90.5253	17.1469	4.93199e+07	5.01498e+07	4.94178e+07	4.94735e+07	5.00939e+07	5.03874e+07	5.0947e+07	5.13518e+07	5.16007e+07	5.23297e+07	5.2756e+07	5.21389e+07	5.26783e+07	5.211e+07	5.20587e+07	5.22442e+07	5.27703e+07	5.28665e+07	5.22574e+07	5.20205e+07
44	179.036	90.5254	17.2061	4.35072e+07	4.4382e+07	4.37951e+07	4.38865e+07	4.40728e+07	4.47209e+07	4.52964e+07	4.56774e+07	4.58851e+07	4.6639e+07	4.71692e+07	4.63414e+07	4.69587e+07	4.63081e+07	4.65219e+07	4.65956e+07	4.71946e+07	4.73647e+07	4.67045e+07	4.63396e+07
45	89.969	90.9763	0.818803	3.10863e+06	3.15876e+06	3.09742e+06	3.09375e+06	3.05683e+06	3.12441e+06	3.09382e+06	3.11237e+06	3.09635e+06	3.17453e+06	3.0525e+06	3.13857e+06	2.9216e+06	3.19493e+06	3.15422e+06	2.75631e+06	2.73394e+06	2.95852e+06	3.23252e+06	3.12961e+06
46	89.969	90.9763	17.0783	6.00575e+06	5.63773e+06	5.62578e+06	5.56872e+06	5.51421e+06	5.12412e+06	4.7545e+06	4.40473e+06	4.46497e+06	4.44587e+06	4.20408e+06	4.06349e+06	4.06605e+06	4.08362e+06	4.05648e+06	3.97924e+06	4.06765e+06	3.86161e+06	3.96804e+06	4.1592e+06
47	90.0464	91.0537	1.21916	2.09942e+06	2.04828e+06	2.0742e+06	2.0467e+06	2.0856e+06	2.06433e+06	2.05876e+06	2.10877e+06	1.95689e+06	1.69049e+06	1.69563e+06	1.72075e+06	1.49248e+06	1.78208e+06	1.83497e+06	3.35402e+06	3.34446e+06	1.7083e+06	1.83979e+06	1.54803e+06
48	90.0464	91.0537	2.01045	3.148e+06	3.13384e+06	3.05258e+06	3.07672e+06	3.08394e+06	3.08422e+06	3.22989e+06	3.10371e+06	3.06432e+06	2.95929e+06	3.1142e+06	3.09881e+06	2.92575e+06	2.82963e+06	2.86358e+06	3.44276e+06	3.47624e+06	3.07264e+06	2.86006e+06	2.87477e+06
49	90.0465	91.0537	3.42005	7.01842e+06	7.05053e+06	7.04272e+06	7.07472e+06	7.18696e+06	6.93407e+06	6.92937e+06	7.063e+06	7.1192e+06	6.77751e+06	7.68942e+06	7.01597e+06	6.90086e+06	7.03384e+06	6.98518e+06	7.11663e+06	7.10314e+06	7.02813e+06	7.02236e+06	6.88531e+06
50	90.0465	91.0538	7.97571	718660	729492	740017	723552	700378	714272	709059	700031	558859	534587	573573	491555	447495	878014	735899	724586	830250	573675	470955	579168
51	90.0465	91.0537	3.43496	3.20044e+06	2.91866e+06	3.1748e+06	3.47027e+06	3.49999e+06	3.25416e+06	2.74176e+06	2.75503e+06	3.18692e+06	2.79208e+06	3.3101e+06	3.062e+06	2.92616e+06	3.03393e+06	2.89558e+06	3.00723e+06	3.00716e+06	3.12812e+06	3.22061e+06	2.91795e+06
52	90.4968	91.5041	17.1769	3.05881e+06	3.1165e+06	3.04222e+06	3.12778e+06	3.08733e+06	3.00255e+06	2.90421e+06	2.95935e+06	2.89921e+06	2.91398e+06	2.85839e+06	2.85917e+06	2.8749e+06	2.92546e+06	2.87109e+06	2.90227e+06	2.92006e+06	2.83737e+06	2.88539e+06	2.92045e+06
53	181.07	91.5421	0.759086	404427	404720	406359	401742	398855	429184	368565	413365	582334	488979	539575	490249	512981	430202	500090	278815	371693	479985	297645	344152
54	91.0497	92.057	3.42349	429401	436914	440434	442531	444464	423350	429149	430833	449663	405334	486725	436166	421308	434560	429382	437712	428806	426444	443966	426753
55	186.075	94.0449	0.737679	922247	921766	878795	921379	907931	1.01896e+06	905426	940535	1.69806e+06	1.27997e+06	1.36278e+06	1.22723e+06	1.32686e+06	1.0517e+06	1.23657e+06	586664	895127	1.21644e+06	615151	759994
56	186.075	94.0448	0.759975	881216	879462	834193	876481	870091	976027	858623	900008	1.65816e+06	1.2417e+06	1.31779e+06	1.18549e+06	1.28519e+06	1.01366e+06	1.19932e+06	548581	854198	1.17544e+06	575841	720237
57	186.075	94.0447	17.1417	950706	937722	954434	930655	947851	908732	844266	855331	850299	871504	839075	862322	887344	871449	838944	869790	877570	858271	835124	855000
58	94.0416	182.081	1.21819	7.17614e+06	7.10208e+06	7.34934e+06	7.4691e+06	7.21862e+06	7.30493e+06	7.25115e+06	7.199e+06	6.72399e+06	5.76493e+06	5.87175e+06	6.01511e+06	5.05058e+06	6.23915e+06	6.41114e+06	1.1967e+07	1.19054e+07	5.96266e+06	6.461e+06	5.30321e+06
59	94.0416	95.0488	1.91242	2.07923e+06	2.07461e+06	2.11075e+06	2.12812e+06	2.0713e+06	2.09639e+06	2.06455e+06	2.06034e+06	2.06821e+06	1.91273e+06	2.16051e+06	2.09161e+06	1.93641e+06	1.78177e+06	1.82171e+06	2.50224e+06	2.54384e+06	2.13823e+06	1.78222e+06	1.83947e+06
60	94.0417	118.065	2.01287	2.14093e+06	2.18751e+06	2.21798e+06	2.22784e+06	2.19519e+06	2.23753e+06	2.18421e+06	2.16728e+06	2.21968e+06	2.05824e+06	2.1944e+06	2.16359e+06	1.98256e+06	1.85943e+06	1.88506e+06	2.658e+06	2.7852e+06	2.24579e+06	1.97767e+06	1.95669e+06
61	95.9141	96.9214	0.856036	943344	975587	942246	955042	951724	949684	948619	952390	508689	850113	864701	901646	898587	964544	1.11668e+06	853175	799610	1.00327e+06	893008	1.09335e+06
62	97.0059	98.0132	17.2045	2.09501e+06	2.18553e+06	2.08205e+06	2.07364e+06	2.07408e+06	2.11341e+06	2.092e+06	2.06532e+06	2.04745e+06	2.09644e+06	2.10735e+06	2.08899e+06	2.08778e+06	2.06495e+06	2.04273e+06	2.10084e+06	2.07767e+06	2.10285e+06	2.03114e+06	2.0828e+06
63	195.009	98.5116	7.81336	2.288e+07	2.37919e+07	2.5613e+07	2.44727e+07	2.45204e+07	2.5267e+07	2.53089e+07	2.46343e+07	2.5769e+07	2.78582e+07	2.52899e+07	2.85552e+07	2.97996e+07	2.37964e+07	2.4665e+07	3.07236e+07	2.97236e+07	2.65259e+07	2.60671e+07	2.45226e+07
64	195.009	98.5116	8.09457	1.34382e+07	1.38852e+07	1.48529e+07	1.45939e+07	1.44072e+07	1.47752e+07	1.46089e+07	1.46769e+07	1.77018e+07	1.50851e+07	1.69469e+07	1.57284e+07	1.66692e+07	1.63935e+07	1.54292e+07	1.75154e+07	1.63696e+07	1.46394e+07	1.75133e+07	1.64154e+07
65	195.009	98.5116	8.40177	5.05538e+06	5.16768e+06	5.51982e+06	5.63241e+06	5.58144e+06	5.44987e+06	5.5213e+06	5.5013e+06	6.51326e+06	5.76294e+06	6.20484e+06	5.79122e+06	6.2547e+06	6.41179e+06	6.08715e+06	6.50876e+06	6.35194e+06	5.40528e+06	6.34969e+06	6.14596e+06
66	195.009	98.5118	17.3624	1.34148e+08	1.35821e+08	1.3682e+08	1.37262e+08	1.38381e+08	1.37884e+08	1.38005e+08	1.37391e+08	1.35447e+08	1.37883e+08	1.35767e+08	1.35715e+08	1.3558e+08	1.35284e+08	1.38624e+08	1.38653e+08	1.39168e+08	1.39218e+08	1.38695e+08	1.38047e+08
67	97.9766	98.9839	1.09193	4.3125e+06	4.29267e+06	4.31676e+06	4.35145e+06	4.31706e+06	4.31038e+06	4.20679e+06	4.37864e+06	7.71576e+06	4.61202e+06	5.85037e+06	3.94775e+06	8.22848e+06	3.01115e+06	6.15656e+06	2.51029e+06	3.65732e+06	6.34057e+06	4.30626e+06	6.41403e+06
68	97.9766	98.9839	4.39569	162961	151044	156725	164876	156296	158668	166689	163186	305835	303001	502508	430834	512295	240872	263035	260413	279366	327272	347699	370644
69	97.9766	98.9838	5.38015	720554	744582	749529	747337	742311	746048	742104	745089	682713	1.0882e+06	794483	728361	784413	628019	649562	482558	581007	768755	702086	664076
70	97.9763	98.9836	7.96686	1.23618e+06	1.25934e+06	1.25519e+06	1.25673e+06	1.25439e+06	1.29894e+06	1.32408e+06	1.34614e+06	1.09388e+06	1.40502e+06	1.24372e+06	1.44531e+06	1.32976e+06	1.26725e+06	1.41985e+06	1.13303e+06	1.17164e+06	1.66496e+06	1.28563e+06	1.47728e+06
71	197.009	99.5118	17.1394	2.35744e+07	2.36293e+07	2.34929e+07	2.38372e+07	2.38956e+07	2.38174e+07	2.39031e+07	2.37718e+07	2.38334e+07	2.40198e+07	2.3869e+07	2.38991e+07	2.39427e+07	2.37983e+07	2.38843e+07	2.40914e+07	2.42748e+07	2.42147e+07	2.40885e+07	2.41507e+07
72	197.009	99.5117	17.2129	2.10201e+07	2.10926e+07	2.09211e+07	2.1282e+07	2.13832e+07	2.12137e+07	2.13812e+07	2.12444e+07	2.13751e+07	2.15829e+07	2.13575e+07	2.14652e+07	2.14447e+07	2.1322e+07	2.13915e+07	2.159e+07	2.174e+07	2.17584e+07	2.15522e+07	2.15784e+07
73	197.009	99.5118	17.2911	2.45687e+07	2.46122e+07	2.45265e+07	2.4863e+07	2.49337e+07	2.4891e+07	2.49382e+07	2.47622e+07	2.49354e+07	2.50772e+07	2.48874e+07	2.49596e+07	2.4995e+07	2.4809e+07	2.48956e+07	2.51707e+07	2.53803e+07	2.53119e+07	2.50936e+07	2.51449e+07
74	197.009	99.5118	17.356	2.84873e+07	2.85016e+07	2.85382e+07	2.88672e+07	2.8944e+07	2.88737e+07	2.89447e+07	2.87411e+07	2.88357e+07	2.89634e+07	2.88407e+07	2.88786e+07	2.89688e+07	2.8715e+07	2.89074e+07	2.92008e+07	2.9403e+07	2.92635e+07	2.9156e+07	2.92359e+07
75	197.009	99.5118	17.5111	2.56147e+07	2.56516e+07	2.56799e+07	2.59955e+07	2.60092e+07	2.59806e+07	2.60438e+07	2.58886e+07	2.60518e+07	2.61323e+07	2.59919e+07	2.60165e+07	2.60715e+07	2.5852e+07	2.60078e+07	2.63438e+07	2.65342e+07	2.64087e+07	2.62101e+07	2.62778e+07
76	98.5234	99.5306	17.1333	236312	233504	241831	236855	263744	267242	269429	274060	272009	296758	295674	312259	318112	282964	277040	283849	285033	306260	301063	294050
77	198.034	100.024	0.759808	208141	215746	201924	205276	188750	210119	192852	201249	358503	277587	293590	266414	281692	230672	268186	124223	187459	264464	123887	167514
78	199.005	100.51	17.1389	9.11846e+06	9.1367e+06	9.10921e+06	9.21848e+06	9.25328e+06	9.19507e+06	9.21224e+06	9.09958e+06	9.16441e+06	9.24381e+06	9.22356e+06	9.15095e+06	9.24351e+06	9.17971e+06	9.28739e+06	9.27254e+06	9.36151e+06	9.3381e+06	9.27354e+06	9.30735e+06
79	99.5022	100.509	17.1953	8.36277e+06	8.37243e+06	8.34492e+06	8.4495e+06	8.51455e+06	8.47064e+06	8.45707e+06	8.36328e+06	8.43943e+06	8.53033e+06	8.52335e+06	8.44705e+06	8.52019e+06	8.46869e+06	8.53266e+06	8.54593e+06	8.61915e+06	8.61692e+06	8.51205e+06	8.53053e+06
80	99.5023	100.51	17.279	8.92493e+06	8.9506e+06	8.93606e+06	9.03012e+06	9.06384e+06	9.0124e+06	9.04071e+06	8.9363e+06	8.99153e+06	9.06192e+06	9.0701e+06	8.983e+06	9.05111e+06	8.9941e+06	9.09759e+06	9.10851e+06	9.18428e+06	9.15626e+06	9.1016e+06	9.10016e+06
81	99.5023	100.51	17.3692	9.90632e+06	9.96841e+06	9.94464e+06	1.00616e+07	1.01316e+07	1.00348e+07	1.00571e+07	9.96077e+06	1.00173e+07	1.00813e+07	1.00681e+07	1.00145e+07	1.00701e+07	1.0011e+07	1.01533e+07	1.01312e+07	1.02258e+07	1.01906e+07	1.01203e+07	1.01525e+07
82	199.005	100.51	17.459	9.55441e+06	9.62349e+06	9.60366e+06	9.72069e+06	9.77014e+06	9.69474e+06	9.70394e+06	9.62603e+06	9.69459e+06	9.75405e+06	9.71961e+06	9.67268e+06	9.72784e+06	9.65861e+06	9.78391e+06	9.80494e+06	9.8748e+06	9.83115e+06	9.76758e+06	9.79471e+06
83	99.5023	100.51	17.5463	1.06616e+07	1.07143e+07	1.06994e+07	1.08395e+07	1.08853e+07	1.07912e+07	1.08214e+07	1.073e+07	1.07832e+07	1.08573e+07	1.08425e+07	1.07737e+07	1.08321e+07	1.07787e+07	1.09248e+07	1.0939e+07	1.10072e+07	1.09755e+07	1.09134e+07	1.09495e+07
84	100.016	101.023	1.28326	307610	299986	335857	324437	315370	318821	327597	325605	244294	464595	568581	391016	723644	401944	320895	86621.2	56887.1	591941	127805	288594
85	202.052	102.033	17.1641	5.44423e+06	5.48267e+06	5.40162e+06	5.4074e+06	5.48483e+06	5.38312e+06	5.22081e+06	5.23901e+06	5.2067e+06	5.28591e+06	5.32992e+06	5.17053e+06	5.19286e+06	5.31585e+06	5.28988e+06	5.2667e+06	5.2218e+06	5.19382e+06	5.17113e+06	5.17882e+06
86	101.039	102.046	2.01717	1.01073e+06	1.01377e+06	983890	1.01196e+06	1.0028e+06	997194	1.00308e+06	974003	1.01794e+06	909350	1.03923e+06	1.03881e+06	918291	863170	880584	1.22065e+06	1.21112e+06	1.03939e+06	868936	892954
87	101.038	119.072	3.42179	1.33862e+07	1.33304e+07	1.33835e+07	1.36315e+07	1.37949e+07	1.33594e+07	1.33679e+07	1.3363e+07	1.35197e+07	1.28273e+07	1.48744e+07	1.36276e+07	1.32856e+07	1.37547e+07	1.35598e+07	1.34282e+07	1.3391e+07	1.33927e+07	1.35668e+07	1.33499e+07
88	101.12	102.127	0.914424	377014	384370	380950	398666	376698	396988	382992	389413	283080	329357	260801	336847	238469	392070	428148	357477	350128	284339	574361	458420
89	101.12	102.127	10.2279	1.39318e+06	1.40258e+06	1.39465e+06	1.39097e+06	1.39675e+06	1.21779e+06	1.15505e+06	1.09677e+06	1.14864e+06	1.04271e+06	1.06514e+06	982357	996079	1.04196e+06	1.02989e+06	1.13547e+06	1.15026e+06	923586	1.05461e+06	1.01188e+06
90	101.12	102.127	10.4513	2.19425e+06	2.17185e+06	2.17761e+06	2.09694e+06	2.07479e+06	1.74083e+06	1.70505e+06	1.61808e+06	1.68965e+06	1.64232e+06	1.69891e+06	1.59756e+06	1.63073e+06	1.62249e+06	1.67357e+06	1.74257e+06	1.74485e+06	1.51797e+06	1.69503e+06	1.64938e+06
91	101.12	102.127	17.0696	1.20786e+07	1.18383e+07	1.18786e+07	1.16855e+07	1.15356e+07	1.10015e+07	1.0608e+07	1.00583e+07	1.02805e+07	1.00594e+07	9.79799e+06	9.56519e+06	9.58815e+06	9.55926e+06	9.56637e+06	9.4018e+06	9.56645e+06	9.1111e+06	9.48886e+06	9.67625e+06
92	102.047	120.081	1.91289	4.67257e+07	4.59193e+07	4.68248e+07	4.7464e+07	4.63695e+07	4.64315e+07	4.54667e+07	4.5796e+07	4.60241e+07	4.34094e+07	4.8203e+07	4.76005e+07	4.23019e+07	3.9469e+07	4.04826e+07	5.48565e+07	5.59335e+07	4.7485e+07	3.89709e+07	4.07827e+07
93	102.047	120.081	2.0122	4.67138e+07	4.59045e+07	4.68104e+07	4.74462e+07	4.6354e+07	4.64171e+07	4.54502e+07	4.57808e+07	4.60082e+07	4.33951e+07	4.81838e+07	4.75887e+07	4.22842e+07	3.94561e+07	4.0472e+07	5.48443e+07	5.59176e+07	4.74666e+07	3.89589e+07	4.07695e+07
94	103.042	104.049	3.42142	700520	687302	725564	709342	727106	698583	707612	703499	720045	674935	791237	722473	697097	734684	705958	709678	696367	712678	711054	719785
95	103.099	104.107	0.873577	7.08825e+07	6.95497e+07	7.03035e+07	7.04181e+07	6.98686e+07	6.96547e+07	6.98731e+07	6.95574e+07	6.67016e+07	7.4215e+07	7.05539e+07	7.77689e+07	8.14361e+07	7.26297e+07	6.70045e+07	4.56623e+07	4.89898e+07	7.62977e+07	5.85154e+07	6.92253e+07
96	103.099	104.106	7.21083	4.0499e+06	5.16889e+06	5.25851e+06	5.19844e+06	5.05042e+06	4.92768e+06	4.40487e+06	4.17885e+06	3.81199e+06	3.67152e+06	4.04931e+06	3.55906e+06	3.52342e+06	3.9211e+06	4.1873e+06	3.51141e+06	3.27774e+06	3.89662e+06	4.00871e+06	4.31184e+06
97	103.099	104.106	7.7087	8.81426e+06	9.19855e+06	9.28325e+06	9.25662e+06	9.02635e+06	8.97896e+06	8.00763e+06	7.66769e+06	7.07341e+06	7.14805e+06	7.35406e+06	6.82234e+06	6.63432e+06	7.06084e+06	7.3567e+06	6.60845e+06	6.43931e+06	7.31246e+06	6.91484e+06	7.49834e+06
98	103.099	104.106	8.17185	6.03493e+06	6.00228e+06	6.0545e+06	6.13254e+06	5.92016e+06	5.96263e+06	5.18596e+06	5.01568e+06	4.60999e+06	4.77216e+06	4.75897e+06	4.60378e+06	4.39134e+06	4.45415e+06	4.56751e+06	4.20983e+06	4.19755e+06	4.76009e+06	4.22781e+06	4.61683e+06
99	103.099	104.106	9.69372	1.06869e+07	1.03836e+07	1.0239e+07	9.99905e+06	9.63716e+06	7.28754e+06	5.98991e+06	5.57633e+06	4.06903e+06	4.54944e+06	4.33208e+06	4.37653e+06	4.03453e+06	4.89989e+06	4.53285e+06	3.4412e+06	3.38141e+06	4.53652e+06	3.92338e+06	4.2841e+06
100	103.099	104.106	9.87681	2.53038e+07	2.41593e+07	2.33503e+07	2.25412e+07	2.11358e+07	1.4745e+07	1.15678e+07	1.03013e+07	7.29374e+06	8.97056e+06	8.35531e+06	8.45592e+06	7.45286e+06	7.73488e+06	7.27493e+06	5.61555e+06	5.48401e+06	7.55431e+06	6.11257e+06	6.55043e+06
101	103.099	104.107	10.0451	1.26699e+07	1.23339e+07	1.21074e+07	1.19638e+07	1.13504e+07	8.4034e+06	7.18365e+06	6.62809e+06	4.76769e+06	5.79495e+06	5.37294e+06	5.63746e+06	5.09644e+06	5.59281e+06	5.09507e+06	3.76075e+06	3.68426e+06	5.24626e+06	4.3338e+06	4.58105e+06
102	103.099	104.106	10.1114	8.23646e+06	8.07212e+06	7.95628e+06	7.86392e+06	7.39528e+06	5.44577e+06	4.66438e+06	4.29511e+06	2.99801e+06	3.80788e+06	3.53038e+06	3.78341e+06	3.34764e+06	3.62193e+06	2.97311e+06	2.10372e+06	2.02846e+06	3.34123e+06	2.45688e+06	2.53687e+06
103	104.103	105.11	0.873478	3.8471e+06	3.76188e+06	3.83642e+06	3.79417e+06	3.82309e+06	3.7689e+06	3.76342e+06	3.76775e+06	3.59893e+06	4.0482e+06	3.83785e+06	4.24259e+06	4.39811e+06	3.95511e+06	3.61329e+06	2.43964e+06	2.62377e+06	4.12161e+06	3.16922e+06	3.77898e+06
104	109.001	151.035	0.766579	663169	653321	639626	633660	633130	695708	619491	646637	1.36797e+06	926672	1.00742e+06	927234	991373	731602	918188	418176	641418	868103	402109	517440
105	218.025	110.02	17.3558	3.78582e+07	3.83839e+07	3.86274e+07	3.84639e+07	3.85308e+07	3.84375e+07	3.81114e+07	3.77408e+07	3.75151e+07	3.82912e+07	3.71828e+07	3.72835e+07	3.75301e+07	3.73888e+07	3.81197e+07	3.83231e+07	3.8242e+07	3.80642e+07	3.81466e+07	3.75473e+07
106	218.025	110.02	17.6614	3.06097e+07	3.11633e+07	3.16604e+07	3.16001e+07	3.13443e+07	3.12202e+07	3.10856e+07	3.10211e+07	3.08739e+07	3.11264e+07	3.03225e+07	3.04066e+07	3.09116e+07	3.06551e+07	3.12973e+07	3.16897e+07	3.16681e+07	3.12118e+07	3.14605e+07	3.0954e+07
107	220.025	111.02	17.1402	2.03912e+07	2.04272e+07	2.03002e+07	2.04042e+07	2.04225e+07	2.02535e+07	2.00388e+07	1.98482e+07	1.98517e+07	1.98571e+07	1.98066e+07	1.97743e+07	1.98272e+07	1.9706e+07	1.98243e+07	2.00065e+07	2.01086e+07	1.99268e+07	1.97958e+07	1.99932e+07
108	220.025	111.02	17.2107	1.87434e+07	1.88014e+07	1.87182e+07	1.87601e+07	1.8769e+07	1.8661e+07	1.84229e+07	1.82494e+07	1.82846e+07	1.82448e+07	1.82197e+07	1.81813e+07	1.82037e+07	1.80871e+07	1.82347e+07	1.83948e+07	1.85083e+07	1.83607e+07	1.81743e+07	1.83954e+07
109	220.025	111.02	17.2737	2.15628e+07	2.16322e+07	2.15004e+07	2.16083e+07	2.15975e+07	2.1496e+07	2.12848e+07	2.10922e+07	2.10925e+07	2.10734e+07	2.09991e+07	2.0977e+07	2.10219e+07	2.09358e+07	2.10796e+07	2.12875e+07	2.13606e+07	2.11636e+07	2.10671e+07	2.12317e+07
110	220.025	111.02	17.3672	2.59864e+07	2.61058e+07	2.60262e+07	2.61211e+07	2.61063e+07	2.59613e+07	2.57674e+07	2.56154e+07	2.5538e+07	2.54827e+07	2.54424e+07	2.54659e+07	2.551e+07	2.53972e+07	2.55849e+07	2.57954e+07	2.59086e+07	2.56571e+07	2.5626e+07	2.58096e+07
111	220.025	111.02	17.4678	2.23785e+07	2.24591e+07	2.23635e+07	2.25051e+07	2.24012e+07	2.23442e+07	2.21728e+07	2.20305e+07	2.19858e+07	2.19163e+07	2.189e+07	2.18308e+07	2.18902e+07	2.17938e+07	2.19618e+07	2.21915e+07	2.22695e+07	2.20546e+07	2.19647e+07	2.20987e+07
112	220.025	111.02	17.532	2.44708e+07	2.46004e+07	2.45144e+07	2.46407e+07	2.45564e+07	2.44323e+07	2.42861e+07	2.41412e+07	2.40787e+07	2.39933e+07	2.3953e+07	2.39129e+07	2.39606e+07	2.38995e+07	2.40857e+07	2.43151e+07	2.44243e+07	2.416e+07	2.41015e+07	2.42685e+07
113	222.021	112.018	17.1386	7.82121e+06	7.85271e+06	7.75379e+06	7.78251e+06	7.84464e+06	7.72285e+06	7.59625e+06	7.54251e+06	7.53697e+06	7.55144e+06	7.57915e+06	7.5537e+06	7.55118e+06	7.52591e+06	7.5661e+06	7.61016e+06	7.5727e+06	7.55834e+06	7.61159e+06	7.63736e+06
114	222.021	112.018	17.1986	7.21329e+06	7.25121e+06	7.16701e+06	7.16856e+06	7.26626e+06	7.15211e+06	7.00671e+06	6.95421e+06	6.98872e+06	6.99941e+06	6.98882e+06	6.98848e+06	6.98832e+06	6.95229e+06	6.9956e+06	7.04356e+06	7.00322e+06	7.00521e+06	7.0209e+06	7.02873e+06
115	222.02	112.018	17.2825	8.28518e+06	8.32746e+06	8.23378e+06	8.26322e+06	8.31092e+06	8.21913e+06	8.08189e+06	8.01787e+06	8.06128e+06	8.05835e+06	8.04359e+06	8.05736e+06	8.08618e+06	8.03692e+06	8.0674e+06	8.1401e+06	8.10921e+06	8.06668e+06	8.10441e+06	8.12908e+06
116	111.01	112.018	17.375	9.43863e+06	9.46327e+06	9.35869e+06	9.41915e+06	9.47438e+06	9.3715e+06	9.24644e+06	9.17912e+06	9.17809e+06	9.17467e+06	9.16464e+06	9.18086e+06	9.19984e+06	9.17706e+06	9.19032e+06	9.27213e+06	9.27509e+06	9.18805e+06	9.26208e+06	9.28142e+06
117	111.01	112.018	17.4426	9.56406e+06	9.58449e+06	9.48923e+06	9.54748e+06	9.60429e+06	9.49817e+06	9.37597e+06	9.31688e+06	9.31187e+06	9.29569e+06	9.30142e+06	9.30488e+06	9.32159e+06	9.3006e+06	9.322e+06	9.41104e+06	9.39358e+06	9.32377e+06	9.3938e+06	9.4175e+06
118	222.021	112.018	17.4976	9.45074e+06	9.47762e+06	9.3845e+06	9.44128e+06	9.48036e+06	9.38841e+06	9.26668e+06	9.21103e+06	9.20728e+06	9.19296e+06	9.19579e+06	9.20209e+06	9.21635e+06	9.19537e+06	9.21806e+06	9.29954e+06	9.28858e+06	9.21544e+06	9.28212e+06	9.31259e+06
119	111.971	112.978	17.1588	1.00722e+06	1.0064e+06	988299	955151	973928	923957	920777	895417	872717	872644	926587	879423	921287	940220	946728	938449	949047	958706	954439	918254
120	112.027	113.034	1.2135	1.02716e+06	1.01021e+06	1.05771e+06	1.05223e+06	1.00308e+06	996628	1.01887e+06	1.03552e+06	910952	1.17205e+06	1.4783e+06	1.22228e+06	2.29923e+06	1.00462e+06	1.26951e+06	532791	491755	1.59197e+06	724369	1.25352e+06
121	112.956	113.963	17.3879	6.50784e+07	6.59097e+07	6.63782e+07	6.65248e+07	6.67895e+07	6.64342e+07	6.63172e+07	6.63562e+07	6.58408e+07	6.6577e+07	6.56543e+07	6.56107e+07	6.57032e+07	6.54957e+07	6.68778e+07	6.69348e+07	6.68228e+07	6.64388e+07	6.66862e+07	6.62847e+07
122	112.956	113.963	17.7996	7.01063e+07	7.13898e+07	7.18238e+07	7.16168e+07	7.19173e+07	7.21261e+07	7.18509e+07	7.15742e+07	7.1019e+07	7.21543e+07	7.11734e+07	7.0873e+07	7.09335e+07	7.07635e+07	7.22217e+07	7.22298e+07	7.19998e+07	7.21064e+07	7.22112e+07	7.15444e+07
123	114.047	115.054	3.32927	622882	639062	611221	602375	604779	620336	612691	601255	678882	657385	619327	510568	580296	462800	520687	776039	787820	642149	564703	481986
124	114.047	132.081	3.36077	797068	806882	773411	780277	815290	784016	784750	776151	899071	836589	795873	658315	780449	595775	677641	992980	1.03396e+06	856907	733862	620965
125	114.046	115.054	4.46324	501705	507971	512554	516884	516120	494502	496547	507412	779905	143490	652824	104417	103252	1.73387e+06	628801	188558	174009	116119	1.26624e+06	649613
126	114.046	115.054	7.97451	616853	619910	622577	598584	609985	601535	610640	573901	446302	408276	458017	372042	342667	780501	638955	611532	764784	457133	349955	455132
127	115.063	116.07	0.791623	2.27893e+06	2.3247e+06	2.33701e+06	2.31887e+06	2.31678e+06	2.33431e+06	2.35462e+06	2.35159e+06	4.20898e+06	2.06645e+06	2.67313e+06	2.00868e+06	2.3551e+06	1.99243e+06	2.49977e+06	2.73655e+06	2.9714e+06	2.57564e+06	2.32877e+06	2.39757e+06
128	115.063	116.07	0.95099	2.82976e+06	2.8626e+06	2.88457e+06	2.87848e+06	2.8703e+06	2.88654e+06	2.91578e+06	2.89088e+06	5.05545e+06	2.53797e+06	3.23295e+06	2.4645e+06	2.89126e+06	2.45616e+06	3.04733e+06	3.31697e+06	3.68698e+06	3.12454e+06	2.84304e+06	2.92536e+06
129	116.05	117.057	3.42091	4.64283e+06	4.71192e+06	4.64738e+06	4.765e+06	4.81382e+06	4.59783e+06	4.67289e+06	4.64557e+06	4.7973e+06	4.551e+06	5.13021e+06	4.58197e+06	4.59398e+06	4.65129e+06	4.65048e+06	4.846e+06	4.8046e+06	4.72572e+06	4.67486e+06	4.52467e+06
130	117.057	118.065	3.31044	4.23759e+07	4.25738e+07	4.20557e+07	4.28927e+07	4.34471e+07	4.21367e+07	4.24118e+07	4.24417e+07	4.4074e+07	4.11452e+07	4.68049e+07	4.23416e+07	4.25024e+07	4.25138e+07	4.22939e+07	4.43361e+07	4.4191e+07	4.31741e+07	4.25554e+07	4.16779e+07
131	117.057	118.065	3.37735	4.23226e+07	4.25246e+07	4.19753e+07	4.28041e+07	4.33827e+07	4.20373e+07	4.23258e+07	4.2358e+07	4.39889e+07	4.10877e+07	4.67142e+07	4.22848e+07	4.2418e+07	4.24528e+07	4.222e+07	4.4247e+07	4.41262e+07	4.31073e+07	4.24717e+07	4.15992e+07
132	117.057	118.065	3.42093	4.22415e+07	4.24407e+07	4.18861e+07	4.27282e+07	4.33018e+07	4.19549e+07	4.22725e+07	4.22728e+07	4.39064e+07	4.09994e+07	4.66246e+07	4.22042e+07	4.23606e+07	4.23713e+07	4.21453e+07	4.41675e+07	4.40405e+07	4.30192e+07	4.23943e+07	4.15207e+07
133	117.057	118.065	3.47972	4.28784e+07	4.30606e+07	4.25205e+07	4.33769e+07	4.39466e+07	4.26049e+07	4.28605e+07	4.28863e+07	4.45365e+07	4.16162e+07	4.72798e+07	4.28351e+07	4.29963e+07	4.29304e+07	4.27191e+07	4.47706e+07	4.46497e+07	4.3638e+07	4.29842e+07	4.2094e+07
134	117.057	118.064	7.97431	522007	541371	538471	536966	541926	547848	524273	515327	431130	408749	435303	388047	364345	628681	547322	540822	617800	433344	395859	443462
135	117.079	118.086	0.916518	2.6341e+07	2.63058e+07	2.68039e+07	2.63607e+07	2.63176e+07	2.64404e+07	2.6203e+07	2.63272e+07	2.22128e+07	1.9655e+07	1.68725e+07	1.87552e+07	1.76102e+07	1.52678e+07	1.64051e+07	5.24177e+07	5.22619e+07	1.83467e+07	2.24981e+07	1.71147e+07
136	117.079	118.086	0.968441	3.42315e+07	3.43683e+07	3.43975e+07	3.44475e+07	3.45212e+07	3.46006e+07	3.3886e+07	3.44426e+07	2.85619e+07	2.60337e+07	2.22827e+07	2.46533e+07	2.28815e+07	1.97876e+07	2.14175e+07	6.69265e+07	6.57342e+07	2.42113e+07	2.96059e+07	2.32015e+07
137	117.079	118.086	1.01306	3.42868e+07	3.44051e+07	3.44689e+07	3.4542e+07	3.45768e+07	3.46794e+07	3.39249e+07	3.4526e+07	2.85294e+07	2.61343e+07	2.23027e+07	2.42922e+07	2.28316e+07	1.96336e+07	2.1331e+07	6.74347e+07	6.59781e+07	2.41442e+07	2.95709e+07	2.31338e+07
138	117.079	118.086	1.029	3.82797e+07	3.82545e+07	3.87452e+07	3.87837e+07	3.85791e+07	3.86153e+07	3.82228e+07	3.87079e+07	3.19603e+07	2.96409e+07	2.54311e+07	2.77491e+07	2.58549e+07	2.23715e+07	2.44088e+07	7.46373e+07	7.25642e+07	2.72857e+07	3.32738e+07	2.65677e+07
139	117.079	118.086	1.0755	2.95596e+07	2.94021e+07	2.96072e+07	2.98216e+07	2.96884e+07	2.96975e+07	2.92663e+07	2.97477e+07	2.47259e+07	2.29978e+07	1.9757e+07	2.12934e+07	2.00256e+07	1.69015e+07	1.84478e+07	5.63162e+07	5.45452e+07	2.11299e+07	2.53386e+07	2.0496e+07
140	117.079	118.086	1.12645	4.12218e+07	4.1243e+07	4.16483e+07	4.17999e+07	4.16397e+07	4.1651e+07	4.11443e+07	4.16853e+07	3.52952e+07	3.27225e+07	2.86382e+07	3.10607e+07	2.90403e+07	2.53615e+07	2.74206e+07	7.86228e+07	7.68379e+07	3.0303e+07	3.61691e+07	2.97822e+07
141	117.079	118.086	1.15116	3.55064e+07	3.54757e+07	3.5947e+07	3.61123e+07	3.57681e+07	3.57998e+07	3.5465e+07	3.59968e+07	2.99086e+07	2.80281e+07	2.42865e+07	2.59827e+07	2.44113e+07	2.08561e+07	2.29769e+07	6.75531e+07	6.52519e+07	2.58094e+07	3.07397e+07	2.53574e+07
142	117.079	118.086	1.20895	2.44466e+07	2.43752e+07	2.45554e+07	2.4556e+07	2.46246e+07	2.45573e+07	2.40366e+07	2.44055e+07	1.96648e+07	1.98469e+07	1.68845e+07	1.84354e+07	1.6792e+07	1.46179e+07	1.60474e+07	4.50928e+07	4.25859e+07	1.83086e+07	2.14747e+07	1.82541e+07
143	117.079	118.086	4.12632	3.13047e+06	3.12802e+06	3.16258e+06	3.16236e+06	3.17396e+06	3.19767e+06	3.18523e+06	3.17297e+06	3.78588e+06	2.71198e+06	3.72285e+06	2.76388e+06	2.68103e+06	4.36247e+06	3.58805e+06	3.19673e+06	3.19135e+06	2.8586e+06	4.01008e+06	3.53722e+06
144	117.079	140.068	17.1058	1.20941e+06	1.3906e+06	1.43846e+06	1.54045e+06	1.54131e+06	1.52857e+06	1.31251e+06	1.13577e+06	1.10277e+06	1.01071e+06	896345	825859	834046	820735	789798	784617	859702	772196	791806	846017
145	118.042	119.049	1.21794	907638	880303	920500	885512	938754	914883	890700	902560	829843	682860	709156	709781	623328	699597	755017	1.52843e+06	1.50655e+06	702264	791468	622779
146	118.061	119.068	3.42121	3.45816e+06	3.42782e+06	3.43681e+06	3.50942e+06	3.54915e+06	3.39644e+06	3.44063e+06	3.4169e+06	3.54385e+06	3.36906e+06	3.80028e+06	3.36159e+06	3.44332e+06	3.43109e+06	3.40944e+06	3.57404e+06	3.59037e+06	3.45779e+06	3.51995e+06	3.34642e+06
147	118.065	119.072	3.4199	1.33862e+07	1.33304e+07	1.33835e+07	1.36315e+07	1.37949e+07	1.33594e+07	1.33679e+07	1.3363e+07	1.35197e+07	1.28273e+07	1.48744e+07	1.36276e+07	1.32856e+07	1.37547e+07	1.35598e+07	1.34282e+07	1.3391e+07	1.33927e+07	1.35668e+07	1.33499e+07
148	118.078	119.085	6.46697	503677	501472	505159	486143	490276	494225	495862	463241	435840	439577	433946	442323	464305	567765	473693	459000	454183	521920	728863	404929
149	119.058	120.065	0.887149	510358	527064	527124	527683	525292	509536	528910	528585	482959	357830	405297	342525	388799	338927	442950	795903	717219	453461	424178	419930
150	119.068	120.076	3.42133	1.00835e+06	1.01992e+06	1.01325e+06	1.0492e+06	1.05237e+06	1.01771e+06	1.02442e+06	1.01938e+06	1.05221e+06	974776	1.14569e+06	1.01736e+06	1.04026e+06	1.06785e+06	1.0248e+06	1.02707e+06	1.03229e+06	1.02714e+06	1.03464e+06	1.01686e+06
151	119.073	120.081	1.91165	4.67257e+07	4.59193e+07	4.68248e+07	4.7464e+07	4.63695e+07	4.64315e+07	4.54667e+07	4.5796e+07	4.60241e+07	4.34094e+07	4.8203e+07	4.76005e+07	4.23019e+07	3.9469e+07	4.04826e+07	5.48565e+07	5.59339e+07	4.7485e+07	3.89709e+07	4.0783e+07
152	119.073	120.081	2.00244	4.67138e+07	4.59051e+07	4.68108e+07	4.74473e+07	4.6354e+07	4.64171e+07	4.54502e+07	4.57812e+07	4.60091e+07	4.33964e+07	4.81838e+07	4.75887e+07	4.22842e+07	3.94561e+07	4.0472e+07	5.48449e+07	5.59179e+07	4.74675e+07	3.89592e+07	4.07694e+07
153	119.073	120.081	3.98723	303144	298552	299044	303029	311716	301448	305728	294169	357995	302948	282109	373426	282374	291802	192116	458081	479787	379154	196022	234918
154	120.02	121.028	8.21607	1.46915e+06	1.43313e+06	1.44336e+06	1.43977e+06	1.44255e+06	1.45008e+06	1.49632e+06	1.45883e+06	1.85463e+06	1.39776e+06	1.60207e+06	1.40828e+06	1.47436e+06	1.79351e+06	1.51724e+06	1.68651e+06	1.66315e+06	1.32599e+06	1.67483e+06	1.57497e+06
155	122.033	123.04	17.141	537898	534477	519277	526803	542208	497242	495227	495565	507038	516870	507888	506078	513099	517749	505423	501734	505521	514652	508119	491420
156	122.037	123.044	1.21771	704130	679811	692046	661515	699351	696195	687606	702967	631796	536004	562885	552400	478457	570690	599956	1.12357e+06	1.10561e+06	564721	599280	476188
157	122.048	123.055	1.21707	3.82934e+06	3.83989e+06	3.89325e+06	3.86144e+06	3.86309e+06	3.82436e+06	3.8518e+06	3.85051e+06	4.38636e+06	2.55792e+06	3.73035e+06	3.85555e+06	4.82729e+06	3.66368e+06	4.34393e+06	3.78332e+06	4.14219e+06	4.98286e+06	3.60588e+06	4.46657e+06
158	125.015	126.022	1.01793	600559	603436	588308	608982	611342	592705	575336	600378	858115	618051	590024	581029	676307	622227	607477	478289	519196	684033	649700	633421
159	125.014	126.021	4.17771	728433	731577	737725	725283	725001	722865	727300	723611	1.07128e+06	2735.28	1.07771e+06	1108.07	1046.57	2.7545e+06	1.65373e+06	2005.03	4610	1670.35	2.25787e+06	1.12604e+06
160	126.104	127.111	4.0596	106176	111806	103161	105839	110556	105413	104641	104977	40259.9	319008	23117.2	34697.6	195262	40734.2	28805.1	21045.7	15954.6	61834.8	35666.3	34754
161	127.054	128.062	4.15475	518506	504939	507627	520518	518250	517133	513331	512538	666236	39238.5	633261	21153.7	26156.6	1.70515e+06	859803	79130.7	69092.4	34466.9	1.18108e+06	646521
162	127.054	128.061	4.46358	545235	557926	562494	551554	552935	549546	542014	540664	911088	71625.1	776174	30608.3	45683.7	2.09833e+06	750443	141743	127784	60006.6	1.47716e+06	778613
163	127.054	128.061	7.97548	544825	537584	543631	518399	522322	531796	519150	514524	379343	363388	407929	321579	281468	688300	559334	530264	668631	412494	314224	399977
164	127.943	128.951	17.361	1.29502e+07	1.31359e+07	1.31245e+07	1.29896e+07	1.29709e+07	1.30582e+07	1.28466e+07	1.29161e+07	1.26627e+07	1.26741e+07	1.2514e+07	1.26595e+07	1.27171e+07	1.27085e+07	1.27867e+07	1.27375e+07	1.27482e+07	1.26215e+07	1.28458e+07	1.27151e+07
165	129.042	130.05	1.21866	2.4178e+06	2.40873e+06	2.42391e+06	2.49361e+06	2.3811e+06	2.46199e+06	2.43688e+06	2.42324e+06	2.3716e+06	1.81156e+06	2.24876e+06	1.77961e+06	2.54671e+06	1.97651e+06	2.59477e+06	1.16837e+06	1.12701e+06	2.27059e+06	1.94085e+06	2.46869e+06
166	129.058	130.065	3.36021	548180	542014	519590	523410	534225	530261	512118	511517	560630	530120	527218	454468	508274	429131	453876	598428	624161	564026	470631	446248
167	129.058	130.065	4.03893	210220	207277	199563	211860	198191	210524	211473	200273	212566	241111	173003	195574	260183	105711	151532	394612	380870	205616	193043	138625
168	129.079	147.113	0.780073	3.07449e+06	3.00205e+06	3.03954e+06	3.02829e+06	3.0331e+06	3.05008e+06	3.04878e+06	3.04905e+06	2.85763e+06	1.83271e+06	2.16245e+06	2.09395e+06	1.95009e+06	1.80728e+06	2.33655e+06	8.06804e+06	6.6905e+06	2.52833e+06	3.25718e+06	2.23342e+06
169	130.081	365.204	7.97601	1.11159e+06	973905	862210	773517	722574	696517	571518	554613	728603	267577	550634	216001	211126	1.23133e+06	671962	876908	1.04996e+06	219316	307658	372114
170	131.069	132.077	0.897462	5.23306e+06	5.20228e+06	5.23293e+06	5.25559e+06	5.17913e+06	5.15796e+06	5.12056e+06	5.23551e+06	9.21662e+06	5.68302e+06	6.3552e+06	4.30521e+06	5.82747e+06	6.03677e+06	6.3249e+06	3.59594e+06	4.72434e+06	7.22187e+06	5.76894e+06	5.67895e+06
171	131.069	132.076	1.02497	3.87766e+06	3.81533e+06	3.65553e+06	3.90399e+06	3.81162e+06	3.80149e+06	3.87048e+06	3.91135e+06	7.32098e+06	4.30595e+06	5.17954e+06	3.23807e+06	4.68376e+06	4.68255e+06	4.76764e+06	2.3476e+06	3.10316e+06	5.47006e+06	3.98068e+06	4.16211e+06
172	131.073	132.081	3.36078	797068	806882	773411	780277	815290	784016	784750	776151	899071	836589	795873	658315	780449	595775	677641	992980	1.03396e+06	856907	733862	620965
173	131.094	132.102	1.00425	5.36786e+06	5.39205e+06	4.897e+06	4.90249e+06	5.25678e+06	5.21605e+06	4.99387e+06	4.84569e+06	3.57307e+06	4.0155e+06	4.05715e+06	4.39766e+06	3.5564e+06	3.37144e+06	3.72613e+06	7.53495e+06	7.75986e+06	5.20147e+06	4.43016e+06	4.25287e+06
174	131.094	132.102	1.32023	1.46798e+08	1.46041e+08	1.48889e+08	1.49513e+08	1.48446e+08	1.47697e+08	1.46177e+08	1.48425e+08	1.25601e+08	1.23711e+08	1.23345e+08	1.26503e+08	1.13067e+08	1.03515e+08	1.14787e+08	2.01773e+08	2.03553e+08	1.31441e+08	1.29758e+08	1.24019e+08
175	131.094	132.102	1.41798	1.45304e+08	1.44547e+08	1.47219e+08	1.47894e+08	1.46869e+08	1.46112e+08	1.44514e+08	1.46832e+08	1.24518e+08	1.22329e+08	1.22113e+08	1.25145e+08	1.11755e+08	1.02416e+08	1.13429e+08	1.99524e+08	2.01151e+08	1.29775e+08	1.28228e+08	1.2252e+08
176	132.024	150.058	1.21723	3.87547e+06	3.84141e+06	3.91092e+06	3.98898e+06	3.91295e+06	3.99719e+06	3.87743e+06	3.82638e+06	6.8809e+06	4.2367e+06	5.37389e+06	4.26184e+06	4.86908e+06	3.96818e+06	3.88829e+06	2.44564e+06	3.04812e+06	4.2861e+06	3.08917e+06	3.78924e+06
177	132.09	116.07	0.779272	351789	343465	370345	352681	354738	359166	360406	358427	371405	226473	240513	204141	188745	261151	280117	865917	747194	306877	510287	317800
178	132.097	133.105	1.41509	9.64573e+06	9.52764e+06	9.73819e+06	9.75119e+06	9.69268e+06	9.70022e+06	9.50928e+06	9.69538e+06	8.21269e+06	8.06483e+06	7.99021e+06	8.17158e+06	7.31644e+06	6.65505e+06	7.42832e+06	1.3251e+07	1.34101e+07	8.56813e+06	8.47271e+06	8.06988e+06
179	133.995	135.003	0.95988	562458	599166	569959	594155	599819	602934	618467	606683	569717	623350	690352	787327	529216	803237	695210	446355	385986	593387	525953	640203
180	136.007	154.041	3.42167	1.35352e+08	1.34778e+08	1.34268e+08	1.35317e+08	1.3718e+08	1.33425e+08	1.33506e+08	1.34723e+08	1.35637e+08	1.30996e+08	1.48678e+08	1.37966e+08	1.34053e+08	1.36901e+08	1.37586e+08	1.33018e+08	1.34538e+08	1.34832e+08	1.34105e+08	1.35995e+08
181	136.98	137.987	17.3389	7.73101e+06	7.62087e+06	7.73546e+06	7.66643e+06	7.62379e+06	7.77962e+06	7.9747e+06	7.72524e+06	7.90909e+06	8.28761e+06	7.89596e+06	7.9271e+06	7.89633e+06	7.77885e+06	7.68271e+06	7.40036e+06	7.42584e+06	7.3628e+06	7.51156e+06	7.46748e+06
182	136.98	137.987	17.6329	7.33669e+06	7.23954e+06	7.33656e+06	7.295e+06	7.20737e+06	7.38048e+06	7.58287e+06	7.34154e+06	7.54522e+06	7.88456e+06	7.50723e+06	7.54177e+06	7.51736e+06	7.39844e+06	7.33172e+06	7.06058e+06	7.09536e+06	7.01876e+06	7.14809e+06	7.10355e+06
183	138.004	156.038	3.42291	4.37078e+07	4.33501e+07	4.33722e+07	4.33246e+07	4.42634e+07	4.28677e+07	4.27079e+07	4.30351e+07	4.3497e+07	4.23671e+07	4.75381e+07	4.44501e+07	4.29757e+07	4.41329e+07	4.42357e+07	4.27757e+07	4.30293e+07	4.30396e+07	4.31504e+07	4.40943e+07
184	138.01	139.017	17.1755	2.07295e+06	2.06434e+06	2.05324e+06	2.07645e+06	2.05518e+06	1.99374e+06	2.02731e+06	1.9978e+06	2.03116e+06	2.08358e+06	2.07763e+06	1.99209e+06	2.0873e+06	2.0383e+06	2.05588e+06	2.01792e+06	2.00827e+06	2.02169e+06	2.01562e+06	1.99506e+06
185	138.043	139.05	0.911721	231758	231872	241352	236730	229844	232153	236164	238271	50148.4	82414.5	81455.8	167046	57773.1	161777	87564.1	1.25397e+06	717454	86900.6	58534.4	193767
186	138.043	139.05	1.21542	274381	261625	275876	275727	281535	269942	269113	281102	99295.7	166192	99749.9	240966	96138.1	217797	96502.8	1.07547e+06	648501	91350.6	85267.5	217736
187	138.98	139.987	17.2096	2.39447e+07	2.39565e+07	2.39103e+07	2.38451e+07	2.3941e+07	2.37165e+07	2.36737e+07	2.37147e+07	2.36471e+07	2.38889e+07	2.37048e+07	2.35836e+07	2.39643e+07	2.37819e+07	2.40618e+07	2.3729e+07	2.3953e+07	2.38152e+07	2.36162e+07	2.36995e+07
188	138.98	139.988	17.384	2.55603e+07	2.55551e+07	2.55285e+07	2.54682e+07	2.55606e+07	2.53024e+07	2.52963e+07	2.53241e+07	2.52418e+07	2.54884e+07	2.52954e+07	2.51649e+07	2.55437e+07	2.53458e+07	2.56445e+07	2.53316e+07	2.55657e+07	2.53655e+07	2.52212e+07	2.53234e+07
189	139.061	140.068	0.866989	710340	714653	707316	723915	731396	739459	695174	742671	1.16773e+06	609408	888516	646921	739681	552118	420108	1.5251e+06	1.71429e+06	370891	550084	339598
190	139.061	140.068	0.994453	1.04742e+06	1.05575e+06	1.04728e+06	1.05356e+06	1.06875e+06	1.07578e+06	1.03368e+06	1.07279e+06	1.9469e+06	1.07584e+06	1.84728e+06	1.28338e+06	1.44718e+06	1.12172e+06	475485	1.73507e+06	1.98019e+06	450022	625053	365098
191	139.061	140.068	4.34118	5.29826e+06	5.11594e+06	5.28352e+06	5.19137e+06	5.1968e+06	5.13734e+06	5.21128e+06	5.21685e+06	5.64963e+06	6.14667e+06	5.20766e+06	6.68577e+06	6.73652e+06	3.70527e+06	5.37754e+06	7.48003e+06	7.12382e+06	6.29867e+06	4.41117e+06	5.87015e+06
192	140.002	141.01	3.42177	899578	878840	884104	881743	901949	900071	843387	866066	877859	839777	941609	912432	862430	879510	900166	867199	864159	863399	866354	861930
193	140.062	141.069	4.4596	217860	228939	231789	227185	224121	230870	220510	231697	479275	1782.8	383505	508.416	0	1.25534e+06	350563	3813.3	6292.61	2377.45	860066	363977
194	140.976	141.983	17.2022	9.688e+06	9.68053e+06	9.69419e+06	9.64318e+06	9.76738e+06	9.64432e+06	9.53937e+06	9.51554e+06	9.55434e+06	9.65802e+06	9.62788e+06	9.54918e+06	9.70554e+06	9.59062e+06	9.69574e+06	9.57781e+06	9.59228e+06	9.61715e+06	9.57411e+06	9.57532e+06
195	140.976	141.983	17.3546	8.95249e+06	8.94375e+06	8.98964e+06	8.91964e+06	8.98246e+06	8.88807e+06	8.80219e+06	8.75372e+06	8.82266e+06	8.86381e+06	8.87006e+06	8.75933e+06	8.9158e+06	8.81817e+06	8.93547e+06	8.80327e+06	8.82491e+06	8.85928e+06	8.81378e+06	8.80324e+06
196	141.058	142.065	3.36006	437130	421293	414873	421875	425071	416583	418498	434095	477564	444357	437078	379993	421163	364784	382595	532105	531004	451812	420533	359643
197	141.931	142.938	1.04349	1.24719e+06	1.29462e+06	1.23376e+06	1.28374e+06	1.2654e+06	1.25655e+06	1.23693e+06	1.28664e+06	1.29393e+06	1.14578e+06	1.1559e+06	1.40563e+06	1.17189e+06	1.32577e+06	1.34293e+06	1.21371e+06	1.17094e+06	1.33772e+06	1.31466e+06	1.35381e+06
198	142.066	143.073	3.36171	436347	441341	435960	427750	418598	435574	413079	418589	486183	468526	431414	352480	430660	325215	373665	523989	566287	462841	395468	338969
199	143.073	144.081	3.34916	3.24962e+06	3.29715e+06	3.17348e+06	3.2273e+06	3.26935e+06	3.24492e+06	3.18934e+06	3.17068e+06	3.72517e+06	3.46281e+06	3.28448e+06	2.71532e+06	3.18985e+06	2.47818e+06	2.83382e+06	4.13211e+06	4.19103e+06	3.49044e+06	3.06974e+06	2.53904e+06
200	145.053	146.06	3.32944	4.20695e+06	4.26147e+06	4.11782e+06	4.14746e+06	4.15128e+06	4.16949e+06	4.09641e+06	4.05773e+06	4.71147e+06	4.43714e+06	4.17504e+06	3.45116e+06	4.063e+06	3.1804e+06	3.63143e+06	5.19571e+06	5.40237e+06	4.48665e+06	3.88634e+06	3.32532e+06
201	145.053	146.06	3.35691	4.22211e+06	4.27111e+06	4.12816e+06	4.15573e+06	4.16707e+06	4.17917e+06	4.10783e+06	4.07081e+06	4.7189e+06	4.44334e+06	4.17802e+06	3.45559e+06	4.06746e+06	3.18649e+06	3.63629e+06	5.20542e+06	5.41213e+06	4.4938e+06	3.89278e+06	3.32943e+06
202	145.074	146.081	2.1384	620662	633715	657400	679008	642816	639321	655038	652653	551312	895247	860016	755828	1.51189e+06	573299	747171	167038	132777	1.28835e+06	325383	760596
203	145.158	146.165	0.766984	593513	595232	602294	617937	619799	623429	606895	632993	171944	927092	164088	12925	124113	166690	178089	87705.9	197539	285212	667506	358064
204	146.069	147.076	0.902016	1.68251e+06	1.67385e+06	1.66707e+06	1.67525e+06	1.66171e+06	1.6708e+06	1.66151e+06	1.69647e+06	2.30773e+06	1.61423e+06	2.13598e+06	1.70208e+06	2.69819e+06	1.86869e+06	2.03619e+06	1.42074e+06	1.32685e+06	1.91279e+06	1.20509e+06	1.67644e+06
205	146.069	147.076	0.951499	1.8456e+06	1.83797e+06	1.83321e+06	1.85529e+06	1.82446e+06	1.83318e+06	1.82445e+06	1.87244e+06	2.52694e+06	1.77895e+06	2.30591e+06	1.83787e+06	2.86154e+06	1.97161e+06	2.19528e+06	1.51631e+06	1.53808e+06	2.0624e+06	1.48609e+06	1.85771e+06
206	146.105	147.113	0.779258	3.07449e+06	3.00205e+06	3.03982e+06	3.02829e+06	3.0331e+06	3.05008e+06	3.04878e+06	3.04905e+06	2.85763e+06	1.83271e+06	2.16245e+06	2.09395e+06	1.95009e+06	1.80728e+06	2.33655e+06	8.06804e+06	6.6905e+06	2.52833e+06	3.25718e+06	2.23342e+06
207	148.015	149.023	8.22298	2.29904e+07	2.29592e+07	2.30694e+07	2.26567e+07	2.29955e+07	2.35638e+07	2.33592e+07	2.32248e+07	2.80093e+07	2.27329e+07	2.52078e+07	2.23826e+07	2.36063e+07	2.7362e+07	2.3792e+07	2.62876e+07	2.58937e+07	2.136e+07	2.58083e+07	2.43911e+07
208	149.051	150.058	1.21785	3.87547e+06	3.84141e+06	3.91092e+06	3.98898e+06	3.91295e+06	3.99719e+06	3.87743e+06	3.80184e+06	6.8809e+06	4.2367e+06	5.37389e+06	4.26184e+06	4.83938e+06	3.96818e+06	3.88829e+06	2.44564e+06	3.04812e+06	4.2861e+06	3.08917e+06	3.78924e+06
209	150.028	151.035	0.762649	664180	654716	640118	635193	634547	696989	620773	647915	1.3694e+06	928146	1.00863e+06	928779	992078	732872	918978	420467	642675	869477	403145	518772
210	151.054	152.061	4.4824	701810	702936	708458	705569	701578	700294	695237	702622	1.349e+06	76908.3	1.09099e+06	21005.6	41937.9	3.33273e+06	947309	138769	137903	42918.6	2.34281e+06	1.05824e+06
211	151.054	152.061	7.98265	395480	398018	409734	386210	387667	383517	371885	365030	265352	265261	287992	233129	194715	502844	407981	383890	506267	290943	209113	269048
212	152.033	153.041	1.35221	244223	250105	247969	245400	245308	253197	250198	254762	32117.3	382088	337336	186364	727147	190008	237786	43049.2	3686.72	674064	65325.4	210610
213	152.058	153.066	1.3219	688594	697047	699195	711862	723627	695363	704581	702678	766738	613413	548978	1.15929e+06	687559	943020	395951	1.22229e+06	973104	815006	632214	429049
214	304.127	153.071	0.753057	216009	192147	170050	192984	200217	211904	201378	192707	292086	248653	263991	238978	239639	193468	224632	128088	170648	234864	127557	163426
215	153.034	154.041	3.38631	1.35254e+08	1.34682e+08	1.34185e+08	1.35215e+08	1.37086e+08	1.33307e+08	1.3343e+08	1.34644e+08	1.35415e+08	1.30916e+08	1.48567e+08	1.37875e+08	1.33972e+08	1.36822e+08	1.37517e+08	1.3291e+08	1.34466e+08	1.34755e+08	1.34014e+08	1.35929e+08
216	153.034	154.041	3.42162	1.35138e+08	1.34559e+08	1.3404e+08	1.35086e+08	1.36956e+08	1.3317e+08	1.33319e+08	1.34524e+08	1.35392e+08	1.30767e+08	1.48432e+08	1.3775e+08	1.33845e+08	1.36703e+08	1.37397e+08	1.32786e+08	1.34332e+08	1.3462e+08	1.33889e+08	1.35808e+08
217	153.983	154.99	17.692	3.05163e+07	3.09724e+07	3.13003e+07	3.10326e+07	3.09769e+07	3.09603e+07	3.09233e+07	3.08842e+07	3.04833e+07	3.08617e+07	3.02439e+07	3.02983e+07	3.05306e+07	3.0442e+07	3.11158e+07	3.07416e+07	3.08826e+07	3.07024e+07	3.07578e+07	3.03133e+07
218	155.031	156.038	3.38316	4.36492e+07	4.32812e+07	4.33134e+07	4.32903e+07	4.41889e+07	4.27978e+07	4.2683e+07	4.2969e+07	4.34254e+07	4.23091e+07	4.74663e+07	4.43863e+07	4.29161e+07	4.4071e+07	4.41834e+07	4.27055e+07	4.29723e+07	4.29797e+07	4.30899e+07	4.40419e+07
219	155.031	156.038	3.41794	4.36146e+07	4.32451e+07	4.32694e+07	4.32545e+07	4.41537e+07	4.27945e+07	4.26518e+07	4.29357e+07	4.34244e+07	4.22628e+07	4.74654e+07	4.43523e+07	4.28733e+07	4.40367e+07	4.41822e+07	4.27031e+07	4.29369e+07	4.29409e+07	4.30566e+07	4.40099e+07
220	155.035	156.042	0.862082	367985	374860	363371	361370	386245	373624	375091	384162	316050	285684	353898	276992	364904	279430	258386	769129	840161	216830	290114	216755
221	155.069	156.076	0.785528	421856	438317	427575	430648	430190	429433	415225	417951	477547	405472	397341	492486	449753	456189	394018	437290	528172	399353	293740	396126
222	157.146	158.154	5.65926	796205	824862	802632	808875	811796	813658	805724	815539	780217	840870	812057	825180	843023	794241	771196	792226	762001	816927	730029	721904
223	157.957	158.964	0.818236	2.00952e+06	2.06812e+06	2.03248e+06	2.03183e+06	2.03551e+06	2.01685e+06	2.00092e+06	2.05348e+06	2.01013e+06	2.08427e+06	1.96436e+06	2.04857e+06	1.88977e+06	2.14596e+06	2.024e+06	1.67541e+06	1.73968e+06	1.8276e+06	2.07967e+06	1.99902e+06
224	157.957	158.964	17.0825	1.3938e+06	1.26432e+06	1.23358e+06	1.24189e+06	1.22342e+06	1.09017e+06	981807	872374	893625	886523	793086	752508	756622	762802	748449	748019	733281	686455	744061	774062
225	158.058	159.065	1.16489	5.65255e+06	5.42402e+06	5.17752e+06	5.28769e+06	5.28291e+06	5.41286e+06	5.935e+06	5.49041e+06	5.52959e+06	5.62629e+06	5.56861e+06	5.66252e+06	5.57605e+06	5.87274e+06	5.7192e+06	4.36712e+06	4.3692e+06	5.28014e+06	5.55374e+06	5.70077e+06
226	158.084	142.065	3.3614	437130	421293	414873	421875	425071	416583	418498	434095	477564	444357	437078	379993	421163	364784	382595	532105	531004	451812	420533	359643
227	159.068	160.076	1.51167	2.38587e+06	2.43243e+06	2.44048e+06	2.46323e+06	2.45228e+06	2.4329e+06	2.41652e+06	2.43229e+06	5.28174e+06	1.12026e+07	9.42876e+06	1.0246e+07	1.09486e+07	5.84751e+06	7.55839e+06	9.10752e+06	6.2634e+06	9.22113e+06	2.18902e+06	7.00441e+06
228	159.089	160.097	3.62253	379182	376678	383177	373333	366640	372991	374652	364441	489502	526075	342038	265191	733326	158611	304918	114188	115323	585988	144236	351496
229	159.126	160.133	0.917554	2.20567e+06	2.22484e+06	2.22832e+06	2.18763e+06	2.1904e+06	2.20248e+06	2.15504e+06	2.20213e+06	2.01581e+06	1.55826e+06	2.84882e+06	1.76416e+06	1.29439e+06	1.8187e+06	2.2835e+06	3.81579e+06	3.41787e+06	3.02091e+06	3.02571e+06	2.80287e+06
230	159.126	160.133	3.75623	435186	432228	441675	436595	441932	430567	425206	430981	348058	552388	336262	560733	350387	391003	425996	358295	460108	472023	553822	571642
231	161.105	162.112	0.896197	3.82795e+06	3.80863e+06	3.83415e+06	3.80763e+06	3.8031e+06	3.79342e+06	3.82995e+06	3.78957e+06	6.59648e+06	3.33144e+06	5.71863e+06	2.69434e+06	3.98029e+06	2.73232e+06	3.82235e+06	4.73853e+06	4.22014e+06	4.33397e+06	3.74765e+06	4.63448e+06
232	161.105	162.112	0.939699	3.91337e+06	3.89617e+06	3.91374e+06	3.89139e+06	3.88395e+06	3.88243e+06	3.90881e+06	3.87396e+06	6.71034e+06	3.39588e+06	5.81481e+06	2.74364e+06	4.05972e+06	2.78007e+06	3.89899e+06	4.84169e+06	4.30694e+06	4.45284e+06	3.8195e+06	4.7392e+06
233	161.105	162.112	0.989483	3.82471e+06	3.80484e+06	3.82523e+06	3.8044e+06	3.79825e+06	3.7897e+06	3.82316e+06	3.78589e+06	6.59143e+06	3.32833e+06	5.71475e+06	2.68946e+06	3.97702e+06	2.72971e+06	3.81831e+06	4.73038e+06	4.21297e+06	4.32781e+06	3.745e+06	4.62894e+06
234	163.913	164.92	0.818002	505415	490697	500930	519291	503039	506258	519134	500904	511864	456429	652315	647599	523583	509317	631756	548662	485391	802223	663957	656379
235	163.923	164.93	0.909363	938224	932904	933646	940150	926091	955310	955616	930514	1.77682e+06	969229	1.34608e+06	796511	1.56705e+06	498099	1.31382e+06	691051	1.10349e+06	1.25068e+06	1.07272e+06	1.48336e+06
236	164.047	165.054	1.21864	853794	855128	880018	889876	885354	878369	866527	876704	826717	700631	708820	716308	617271	737694	765887	1.4214e+06	1.42886e+06	727754	757294	637316
237	164.062	165.069	4.48795	710179	721207	702591	717647	719275	709603	708757	699522	1.41052e+06	54860.3	1.12599e+06	15426.2	21091.5	3.54662e+06	996612	123117	112976	29538.7	2.41991e+06	1.10733e+06
238	164.12	165.127	7.25536	142896	132200	123817	132295	130770	123851	114658	118822	60588.2	73496.3	86854.1	77266	79216.5	51998.1	287681	120213	74489.8	149102	473210	102300
239	165.079	166.086	1.91142	5.86838e+07	5.75434e+07	5.88695e+07	5.87087e+07	5.88877e+07	5.81866e+07	5.74906e+07	5.82113e+07	5.85315e+07	5.42484e+07	5.99234e+07	5.91886e+07	5.39733e+07	5.01963e+07	5.12786e+07	6.962e+07	7.13689e+07	5.9926e+07	5.03183e+07	5.11843e+07
240	165.079	166.086	2.01179	5.86549e+07	5.75142e+07	5.8839e+07	5.86797e+07	5.88639e+07	5.81576e+07	5.74645e+07	5.81777e+07	5.84995e+07	5.42219e+07	5.98838e+07	5.91596e+07	5.39328e+07	5.01688e+07	5.12571e+07	6.95925e+07	7.13379e+07	5.9896e+07	5.02956e+07	5.11633e+07
241	165.079	166.086	4.91034	542029	566805	560895	575335	576420	576493	547784	582440	186624	118827	135376	114148	98361.2	190183	105971	196130	221452	170313	407328	339241
242	166.986	167.993	4.71736	41792.1	43959.5	44398.5	43928.5	45134	50582.7	50663	44224.7	2593.49	31533.6	349127	692174	40399.7	81299.8	4591.44	42609.4	131238	94732	35332.7	24365.1
243	168.028	169.036	1.06449	3.62814e+06	3.63865e+06	3.72965e+06	3.72683e+06	3.71387e+06	3.64074e+06	3.6032e+06	3.70244e+06	5.15057e+06	7.93947e+06	9.26165e+06	8.30209e+06	1.04065e+07	6.87787e+06	6.88492e+06	2.79298e+06	2.13536e+06	1.03432e+07	2.06518e+06	5.61781e+06
244	168.028	169.035	1.212	3.22906e+06	3.20122e+06	3.21274e+06	3.25656e+06	3.22593e+06	3.167e+06	3.16561e+06	3.21547e+06	4.38853e+06	7.07587e+06	8.04161e+06	7.30014e+06	8.96799e+06	6.07758e+06	5.99897e+06	2.39669e+06	1.87284e+06	9.12003e+06	1.80904e+06	4.88826e+06
245	168.087	191.076	0.793734	2.00656e+06	2.03776e+06	2.02249e+06	2.01084e+06	1.9885e+06	1.95646e+06	2.00476e+06	1.96879e+06	2.08754e+06	1.18141e+06	1.47243e+06	1.4169e+06	1.19799e+06	1.21147e+06	1.57105e+06	5.17673e+06	4.53534e+06	1.57583e+06	2.19192e+06	1.39947e+06
246	168.97	169.977	17.653	8.72276e+06	8.86788e+06	8.88427e+06	8.67851e+06	8.74576e+06	8.64576e+06	8.49926e+06	8.60897e+06	8.3774e+06	8.51016e+06	8.28267e+06	8.32123e+06	8.47142e+06	8.42768e+06	8.54062e+06	8.43697e+06	8.38902e+06	8.40559e+06	8.52952e+06	8.36919e+06
247	168.978	169.985	0.976916	1.217e+06	1.22419e+06	1.22245e+06	1.2273e+06	1.21406e+06	1.23136e+06	1.20413e+06	1.2332e+06	1.6534e+06	1.24396e+06	1.24471e+06	1.17555e+06	1.11727e+06	1.22452e+06	1.23852e+06	1.1769e+06	1.2783e+06	1.29887e+06	1.47814e+06	1.2671e+06
248	169.053	170.06	3.36173	1.18308e+06	1.1993e+06	1.11969e+06	1.13332e+06	1.13222e+06	1.14945e+06	1.10432e+06	1.13306e+06	1.29538e+06	1.2236e+06	1.15558e+06	958113	1.12292e+06	865699	994171	1.42704e+06	1.47531e+06	1.25175e+06	1.06128e+06	909388
249	170.142	171.149	4.4595	455673	452918	458368	450352	464596	440590	461473	452313	352325	431721	353386	413218	414189	254623	339995	470119	691002	390721	289531	352237
250	171.949	172.956	17.2849	2.29898e+06	2.19372e+06	2.19531e+06	2.14309e+06	2.17744e+06	2.12594e+06	2.1049e+06	2.03701e+06	2.10097e+06	2.13513e+06	2.01983e+06	2.0492e+06	2.09023e+06	2.09684e+06	2.05103e+06	2.05678e+06	2.05779e+06	2.00133e+06	2.05666e+06	2.04168e+06
251	172.157	173.165	5.08762	338547	338958	350538	348837	340315	339326	333405	340577	348406	349806	342995	355252	372672	336022	350418	367960	353040	363668	328163	336031
252	173.105	174.112	4.0288	778853	781217	788596	774231	781563	776349	768021	756874	461064	1.42594e+06	692068	715732	1.37947e+06	378927	637572	230209	218334	963334	246360	691356
253	173.946	174.953	17.2853	677725	658089	658067	623035	651350	628077	632247	615561	625614	635033	628548	614563	631010	625153	620677	606353	616857	600045	611438	606456
254	174.111	175.119	0.791424	547572	562926	579406	570974	565191	549667	561150	548196	39613.6	1.05912e+06	1.45477e+06	1.33688e+06	1.59553e+06	587341	850983	383999	106782	824617	24395.1	818356
255	174.111	175.119	0.863654	533086	550990	562955	556980	552082	536204	547312	535065	39613.6	1.02249e+06	1.38327e+06	1.27437e+06	1.51625e+06	561037	825511	380125	106530	800041	24395.1	799305
256	175.03	176.037	3.7764	241828	220116	228623	241932	240896	232446	236185	236276	308280	448392	259249	195562	305385	122212	52822.4	11460.9	13126.5	125253	72417.5	110420
257	176.053	177.061	0.803554	760522	744484	752987	753550	740857	724234	738782	732904	831106	435111	485951	372069	308396	544579	593264	1.72544e+06	1.59917e+06	576487	1.07808e+06	638087
258	176.095	160.076	1.5253	2.38587e+06	2.43243e+06	2.441e+06	2.46368e+06	2.45391e+06	2.4329e+06	2.41754e+06	2.43229e+06	5.28375e+06	1.12106e+07	9.4343e+06	1.025e+07	1.09568e+07	5.85061e+06	7.56355e+06	9.1123e+06	6.26708e+06	9.22682e+06	2.18902e+06	7.00832e+06
259	177.07	178.077	4.48157	423512	413994	410350	425805	427870	410752	420418	437790	903446	5495.77	724920	546.792	1826.51	2.31174e+06	598200	17975.4	15642.6	0	1.58225e+06	675664
260	178.077	179.085	4.48345	419594	423252	419071	428558	413543	412308	421945	435653	917192	3537.23	733939	0	0	2.28847e+06	599237	4089.09	6141.27	970.464	1.53992e+06	687994
261	181.978	182.985	17.3689	9.20126e+06	9.2143e+06	9.2977e+06	9.34408e+06	9.44091e+06	9.3424e+06	9.33768e+06	9.29946e+06	9.13697e+06	9.32979e+06	9.13799e+06	9.18526e+06	9.2849e+06	9.2612e+06	9.46028e+06	9.46251e+06	9.52825e+06	9.45465e+06	9.45035e+06	9.36405e+06
262	181.978	182.985	17.6491	7.55344e+06	7.60482e+06	7.66988e+06	7.74267e+06	7.74313e+06	7.68168e+06	7.71106e+06	7.66557e+06	7.53959e+06	7.72155e+06	7.5287e+06	7.56497e+06	7.65761e+06	7.65273e+06	7.79679e+06	7.81937e+06	7.87527e+06	7.84684e+06	7.7994e+06	7.73918e+06
263	182.07	183.078	4.39649	77252.7	71743.7	72121.1	74130.8	76851.3	78001.5	73676.4	74159.3	220148	193365	395046	329388	383442	234986	186886	158118	160301	206698	319357	295747
264	182.109	183.116	4.44617	165131	159314	162966	166918	162631	170228	168729	156262	360340	1100.64	292655	0	1033.99	964137	257068	997.752	1063.25	0	649916	295275
265	183.065	184.072	7.47851	3.05438e+06	3.17751e+06	3.15534e+06	3.25084e+06	3.30065e+06	3.32911e+06	3.77911e+06	3.83991e+06	4.73069e+06	3.19878e+06	5.22273e+06	3.32173e+06	3.25799e+06	5.9007e+06	5.10208e+06	2.99337e+06	2.89153e+06	3.84595e+06	5.50205e+06	6.01916e+06
266	183.065	184.072	7.97016	7.97325e+06	8.08718e+06	8.27425e+06	8.23635e+06	8.34029e+06	8.45364e+06	9.17209e+06	9.34038e+06	6.23398e+06	1.02788e+07	7.93292e+06	9.9518e+06	9.24742e+06	7.58909e+06	9.16756e+06	7.58349e+06	7.84549e+06	1.16896e+07	7.72384e+06	9.07913e+06
267	183.065	184.072	8.17131	9.28113e+06	9.36111e+06	9.52993e+06	9.46822e+06	9.59825e+06	9.80009e+06	1.07927e+07	1.09639e+07	7.45519e+06	1.20859e+07	9.29799e+06	1.17686e+07	1.0836e+07	8.9175e+06	1.09698e+07	9.13211e+06	9.47617e+06	1.38764e+07	9.36988e+06	1.11273e+07
268	183.065	184.072	9.43249	6.37515e+06	6.51198e+06	6.47446e+06	6.63458e+06	7.6963e+06	1.13052e+07	1.46836e+07	1.48218e+07	1.42731e+07	1.63386e+07	1.55383e+07	1.81461e+07	1.72761e+07	1.63141e+07	1.59267e+07	1.44942e+07	1.48325e+07	1.81613e+07	1.49225e+07	1.63527e+07
269	183.065	184.072	10.8115	341956	352163	356893	473796	882889	2.12075e+06	2.21449e+06	2.61574e+06	2.34896e+06	2.59922e+06	2.69162e+06	2.98371e+06	3.10267e+06	3.46054e+06	3.44923e+06	2.58744e+06	2.6158e+06	4.09851e+06	3.57151e+06	4.01227e+06
270	183.065	184.072	17.123	4267.31	2328.04	4647.95	13156.8	14818.2	97526.6	158637	202588	221998	211749	232759	254865	260211	259691	271881	284908	272971	267637	279957	265157
271	183.972	184.98	0.992935	294809	289121	290058	277415	279869	290833	286074	262423	95448.3	351033	289559	321502	282821	354029	286291	74435.6	45948.4	301402	124250	219202
272	183.978	184.985	17.1832	2.53509e+06	2.54038e+06	2.51653e+06	2.5281e+06	2.55744e+06	2.48921e+06	2.48453e+06	2.53406e+06	2.50544e+06	2.52954e+06	2.52377e+06	2.55086e+06	2.55167e+06	2.54601e+06	2.54616e+06	2.58496e+06	2.58469e+06	2.57874e+06	2.55361e+06	2.59727e+06
273	184.107	185.114	4.24868	531110	529851	531920	540924	532035	537369	530920	532753	450059	923488	424852	984338	975734	283916	332331	966893	872148	920253	320263	450996
274	187.063	188.07	3.33055	2.22524e+07	2.26191e+07	2.15942e+07	2.17051e+07	2.17655e+07	2.21233e+07	2.11638e+07	2.12215e+07	2.4881e+07	2.35297e+07	2.20112e+07	1.85616e+07	2.12907e+07	1.65574e+07	1.90129e+07	2.71355e+07	2.83509e+07	2.36938e+07	2.0202e+07	1.73084e+07
275	187.063	188.07	3.35817	2.21333e+07	2.25037e+07	2.14687e+07	2.15676e+07	2.16396e+07	2.19944e+07	2.10472e+07	2.11001e+07	2.47575e+07	2.33999e+07	2.18913e+07	1.84606e+07	2.11714e+07	1.64753e+07	1.89131e+07	2.69716e+07	2.81796e+07	2.35726e+07	2.00735e+07	1.72203e+07
276	187.066	188.074	3.72437	658992	667318	674886	673558	649413	661979	650508	658995	543712	589338	338666	914771	377282	491411	397075	689820	592909	339959	700434	775583
277	187.193	188.2	4.66509	153003	145167	152585	143440	148237	147222	146719	148282	112190	461666	51759.8	59261.9	88820.7	110207	168800	91203.2	50124	56278.4	49185.7	52907.7
278	190.033	191.04	0.841084	1.10144e+06	1.10682e+06	1.119e+06	1.1068e+06	1.10166e+06	1.10671e+06	1.12091e+06	1.10269e+06	1.14962e+06	1.01266e+06	1.10065e+06	1.01184e+06	1.01697e+06	1.16485e+06	1.23216e+06	1.14737e+06	1.07278e+06	895085	923047	1.0408e+06
279	190.069	191.076	0.806019	1.91859e+06	1.94787e+06	1.93391e+06	1.91989e+06	1.90802e+06	1.87329e+06	1.91817e+06	1.8849e+06	2.01249e+06	1.12581e+06	1.41102e+06	1.34354e+06	1.15144e+06	1.14661e+06	1.50491e+06	4.9757e+06	4.37181e+06	1.51791e+06	2.09881e+06	1.34177e+06
280	192.147	193.154	0.896955	224561	238613	229851	244331	238542	233754	228374	232225	123396	73878.1	72190.5	57005.6	75890.2	192085	178894	1.07716e+06	747526	150632	200736	55021.2
281	193.074	194.081	3.84272	473465	474661	479276	483542	464728	473724	464387	478793	908908	1.05244e+06	314182	249022	389130	476254	153568	363170	257740	265314	216027	292839
282	194.094	195.101	6.68238	432565	450675	448391	445964	464483	446592	425470	413329	458136	452961	450861	446829	441495	455488	419646	425051	447096	469464	435138	449486
283	199.034	241.068	0.809422	3.58094e+06	3.39446e+06	3.29423e+06	3.37315e+06	3.40166e+06	3.45808e+06	3.54896e+06	3.41603e+06	3.23203e+06	3.36868e+06	3.40908e+06	3.39586e+06	3.19469e+06	3.43568e+06	3.35207e+06	2.94099e+06	2.96914e+06	3.16055e+06	3.32904e+06	3.41769e+06
284	199.039	200.046	3.42602	1.0126e+08	1.01213e+08	9.87901e+07	1.01437e+08	1.01961e+08	9.91815e+07	9.90887e+07	1.00504e+08	1.02379e+08	9.81838e+07	1.1147e+08	1.04466e+08	1.00678e+08	1.03508e+08	1.04389e+08	9.9683e+07	1.01655e+08	1.00595e+08	9.93841e+07	1.03928e+08
285	200.119	201.127	7.97824	271518	277442	276653	264279	265315	265601	271832	272545	206707	193956	211125	162179	144345	389310	302322	287256	341238	216905	156273	207914
286	201.036	202.044	3.37997	3.19408e+07	3.20637e+07	3.1375e+07	3.17366e+07	3.22048e+07	3.10896e+07	3.09393e+07	3.15447e+07	3.18773e+07	3.12493e+07	3.4796e+07	3.25806e+07	3.14732e+07	3.21279e+07	3.2611e+07	3.10667e+07	3.17137e+07	3.14539e+07	3.12727e+07	3.22897e+07
287	201.036	202.043	3.41836	3.18234e+07	3.19355e+07	3.1261e+07	3.16282e+07	3.20775e+07	3.09643e+07	3.08454e+07	3.14325e+07	3.17811e+07	3.11361e+07	3.46669e+07	3.24475e+07	3.13521e+07	3.20271e+07	3.25265e+07	3.09503e+07	3.16024e+07	3.13289e+07	3.11687e+07	3.21849e+07
288	201.111	202.119	1.21541	173795	185062	170696	180559	177344	175230	163398	177191	220164	383869	169471	189332	235759	170309	95378.5	63553.1	109996	115612	261446	236238
289	201.136	202.143	3.95004	419929	426938	405756	442545	441387	426307	397364	442108	0	517.992	0	0	0	548.613	0	0	520.344	557.184	0	477.6
290	201.136	202.143	4.65952	236887	222677	236759	232536	231609	221661	225536	237867	290139	428252	299453	378666	320515	180596	114061	134025	170747	301684	194067	226988
291	202.045	203.052	0.850434	3.73647e+06	3.81137e+06	3.81085e+06	3.84698e+06	3.80798e+06	3.83153e+06	3.88731e+06	3.85032e+06	1.00495e+07	6.48198e+06	1.22889e+07	7.6107e+06	1.13929e+07	7.1592e+06	2.49588e+06	1.02236e+06	1.28095e+06	4.67056e+06	1.7293e+06	2.05892e+06
292	202.045	203.052	0.87816	3.69972e+06	3.7742e+06	3.76834e+06	3.80752e+06	3.76951e+06	3.7915e+06	3.8459e+06	3.81356e+06	9.98611e+06	6.41721e+06	1.21542e+07	7.5263e+06	1.12871e+07	7.08596e+06	2.46845e+06	1.01306e+06	1.2689e+06	4.62832e+06	1.71069e+06	2.03776e+06
293	202.045	203.052	0.914537	3.89548e+06	3.97195e+06	3.97179e+06	4.00344e+06	3.96285e+06	3.97832e+06	4.05694e+06	4.01241e+06	1.03203e+07	6.70688e+06	1.27487e+07	7.862e+06	1.17828e+07	7.43045e+06	2.60299e+06	1.06584e+06	1.32996e+06	4.83923e+06	1.79653e+06	2.14857e+06
294	202.045	203.052	0.952027	3.90237e+06	3.97905e+06	3.97887e+06	4.0099e+06	3.97058e+06	3.98428e+06	4.06539e+06	4.01961e+06	1.03355e+07	6.71956e+06	1.27664e+07	7.86104e+06	1.18018e+07	7.43992e+06	2.60735e+06	1.06777e+06	1.33261e+06	4.84644e+06	1.79918e+06	2.15306e+06
295	203.115	204.123	0.943374	1.22486e+07	1.21507e+07	1.20799e+07	1.19705e+07	1.1902e+07	1.19886e+07	1.18476e+07	1.17805e+07	1.29956e+07	1.32841e+07	1.43874e+07	1.2311e+07	1.04527e+07	9.25442e+06	1.47225e+07	2.13517e+07	1.9153e+07	1.37875e+07	1.43575e+07	1.09918e+07
296	203.115	204.123	1.00294	1.26096e+07	1.25334e+07	1.23486e+07	1.22348e+07	1.23025e+07	1.24242e+07	1.21148e+07	1.2047e+07	1.33697e+07	1.36286e+07	1.47646e+07	1.28171e+07	1.07674e+07	9.51621e+06	1.5056e+07	2.18976e+07	1.96333e+07	1.42977e+07	1.48273e+07	1.13275e+07
297	203.115	204.123	1.21796	9.92028e+06	9.75379e+06	9.52993e+06	9.57842e+06	9.56794e+06	9.46623e+06	9.54469e+06	9.38151e+06	9.16595e+06	1.1075e+07	1.00848e+07	9.72576e+06	9.02758e+06	7.38707e+06	1.165e+07	1.44895e+07	1.31765e+07	1.26341e+07	1.02904e+07	9.14303e+06
298	203.126	204.133	1.21453	315578	310741	304591	311389	326729	310985	303846	300985	216692	344087	194869	399858	275987	224820	228016	278524	311655	358653	365475	378140
299	408.155	205.085	8.21503	624354	646440	628193	637264	619190	648900	655248	644588	775776	644002	708559	628274	650594	784690	668743	723377	702844	585610	735708	681818
300	204.09	188.07	3.32608	2.22524e+07	2.26191e+07	2.15942e+07	2.17051e+07	2.17655e+07	2.21233e+07	2.11638e+07	2.12215e+07	2.4881e+07	2.35297e+07	2.20112e+07	1.85616e+07	2.12907e+07	1.65574e+07	1.90129e+07	2.71355e+07	2.83512e+07	2.36938e+07	2.0202e+07	1.73084e+07
301	204.09	188.07	3.35752	2.21333e+07	2.25037e+07	2.14791e+07	2.15679e+07	2.16396e+07	2.20052e+07	2.10472e+07	2.11001e+07	2.47585e+07	2.33999e+07	2.19038e+07	1.84606e+07	2.11714e+07	1.64753e+07	1.89131e+07	2.69716e+07	2.81796e+07	2.35726e+07	2.00738e+07	1.72283e+07
302	205.074	206.081	4.0421	395001	392018	401414	378333	398526	384440	400193	401886	268091	302798	257680	294170	324941	230321	337651	1.10599e+06	951026	318446	476051	282773
303	205.886	206.894	0.850105	497615	485360	495337	499632	489941	504397	485813	495486	467369	470569	456699	518992	350803	525627	503659	532465	495786	374069	558924	501640
304	414.135	208.075	4.44603	73062.9	73515.1	74235.3	75398.2	73922.5	73571.5	73843.7	73859.9	0	317054	0	540.168	0	0	0	0	846.432	109175	0	578.688
305	207.089	208.097	3.98535	151862	147826	148312	150996	146446	148849	151259	152777	191234	153391	145938	222344	126447	194307	88478.8	287860	305087	196433	101682	123049
306	207.883	208.891	0.850377	311371	317455	315173	317245	320110	311509	313825	317405	291305	301881	302397	335456	220522	332395	333501	332712	318070	233777	356154	323703
307	208.124	209.132	4.51346	608965	632991	626717	640286	637506	627442	634264	622799	1.45359e+06	1165.61	1.17243e+06	1054.82	0	3.96048e+06	862369	476.136	2938.01	0	2.59186e+06	1.0867e+06
308	211.012	212.02	4.9456	520813	513590	514182	517166	524687	504783	501178	499804	0	56011.5	0	158057	0	896.592	0	417951	2.05535e+06	0	5445.16	0
309	214.009	215.016	1.22648	1.23354e+06	1.22891e+06	1.22926e+06	1.24354e+06	1.21755e+06	1.22449e+06	1.20261e+06	1.2323e+06	3.19638e+06	1.61962e+06	1.82887e+06	1.18501e+06	2.03975e+06	1.09392e+06	2.15897e+06	689514	927863	1.76524e+06	1.45198e+06	2.17236e+06
310	215.152	238.141	4.97303	743714	725378	738823	728214	720568	702443	721905	690821	716281	796228	713058	857469	842275	527390	700332	791179	783210	804157	557199	686539
311	215.915	216.922	0.837684	1.22756e+06	1.2673e+06	1.24596e+06	1.23674e+06	1.24039e+06	1.23407e+06	1.21365e+06	1.22736e+06	1.23215e+06	1.23364e+06	1.21235e+06	1.26122e+06	981084	1.2746e+06	1.28101e+06	1.22379e+06	1.21424e+06	1.0571e+06	1.36118e+06	1.23018e+06
312	216.097	217.104	16.8693	5.42176e+07	5.35164e+07	5.33145e+07	5.2889e+07	5.27302e+07	5.04083e+07	4.71494e+07	4.44563e+07	4.61058e+07	4.8133e+07	4.58162e+07	4.51373e+07	4.51764e+07	4.25904e+07	4.30432e+07	4.26455e+07	4.25933e+07	4.25182e+07	4.20695e+07	4.3243e+07
313	217.131	218.138	0.934363	547321	527974	524305	512236	526426	526915	507135	532872	465215	640690	551518	337986	630987	306903	510225	889998	576151	604650	370414	319514
314	217.131	218.138	1.43587	5.17903e+06	5.16069e+06	5.13071e+06	5.24513e+06	5.21007e+06	5.18345e+06	4.99467e+06	5.20586e+06	4.41822e+06	6.18102e+06	4.83544e+06	3.2059e+06	6.95391e+06	2.65085e+06	4.77029e+06	7.52489e+06	4.99615e+06	7.3314e+06	2.99905e+06	3.0366e+06
315	217.131	218.138	1.46804	3.98667e+06	3.95773e+06	3.89964e+06	3.96514e+06	3.96194e+06	3.93486e+06	3.7755e+06	3.88257e+06	3.29001e+06	4.58824e+06	3.6287e+06	2.38638e+06	5.07367e+06	1.97463e+06	3.49682e+06	5.4874e+06	3.74626e+06	5.50969e+06	2.24039e+06	2.24244e+06
316	217.131	218.138	1.51589	4.77857e+06	4.7794e+06	4.76634e+06	4.8597e+06	4.8239e+06	4.80311e+06	4.61325e+06	4.82256e+06	4.07157e+06	5.71611e+06	4.44252e+06	2.94868e+06	6.41631e+06	2.42059e+06	4.40934e+06	6.97065e+06	4.62004e+06	6.80709e+06	2.75224e+06	2.79778e+06
317	217.203	218.21	4.16599	327241	322334	332177	331384	326954	324242	326050	329464	444278	653492	494255	321816	345286	759006	372155	227298	206829	206303	345081	487100
318	217.912	218.92	0.837657	376119	393403	366989	373578	383937	370204	363574	374852	378001	361858	364523	392889	300684	410311	387363	383217	376523	314583	421340	371031
319	218.019	219.026	0.875757	542381	541920	551512	540263	537424	543482	549357	560813	762456	801364	1.45603e+06	886914	1.66922e+06	898306	418961	149842	193508	855891	248027	369526
320	219.129	220.136	4.05055	135789	136853	136770	135772	131788	140729	136442	138708	118220	223574	149175	138240	287305	91994.8	175863	31198.6	37565.2	206607	110141	191868
321	220.011	221.018	0.843226	225167	242329	248331	251498	246332	243494	243188	241798	189886	262935	265912	293460	281649	228284	197730	181334	174055	295644	210337	251624
322	220.178	221.186	0.896579	1.08551e+06	1.09448e+06	1.0774e+06	1.09312e+06	1.08184e+06	1.08704e+06	1.07281e+06	1.08566e+06	787611	702441	422787	665505	792056	473946	510430	1.37378e+06	1.87294e+06	807130	548511	468338
323	221.051	222.058	4.48793	83481.3	81986.3	81950.7	82180.3	76185.1	79627.2	79604.9	78757.6	516.624	12183.4	47475.5	14548.8	12976.6	92481	109670	529162	324951	87201.6	134809	92887.6
324	222.086	223.094	0.813149	600022	553890	544901	547922	559987	575444	578465	565135	530195	568794	560940	568606	536011	568070	569268	494180	489591	513517	572791	566798
325	223.033	224.041	3.77597	163132	157782	164075	159596	159816	158588	163758	164467	207702	310068	173079	146585	208877	82338.3	36020.6	2416.54	1971.58	86488.9	48540.6	71219.4
326	224.141	225.148	7.25564	418085	391355	372876	397385	393125	380872	358713	358051	196025	229291	253678	215653	244133	139644	902421	379762	234571	451226	1.41545e+06	325446
327	224.991	225.999	4.88381	329929	323704	317071	315046	324452	322348	311629	320052	450534	251231	609025	365054	666289	367631	324362	178952	177800	335887	375435	349898
328	225.944	226.951	0.817458	4.53765e+06	4.66892e+06	4.60711e+06	4.5709e+06	4.5692e+06	4.55313e+06	4.49571e+06	4.54478e+06	4.57971e+06	4.7562e+06	4.37654e+06	4.61181e+06	4.22345e+06	4.89879e+06	4.46999e+06	3.57642e+06	3.76023e+06	3.90088e+06	4.58973e+06	4.46209e+06
329	225.944	226.951	17.0795	8.32872e+06	7.54557e+06	7.41026e+06	7.32372e+06	7.28441e+06	6.21368e+06	5.25609e+06	4.58573e+06	4.85437e+06	4.7273e+06	4.23869e+06	4.03578e+06	3.96117e+06	3.91782e+06	3.90549e+06	3.84176e+06	3.9634e+06	3.59396e+06	3.83017e+06	4.10593e+06
330	226.135	227.142	4.47323	293511	300753	299626	295416	297831	290266	296602	297013	702062	0	554411	0	0	1.87316e+06	422002	0	552.015	0	1.22942e+06	496082
331	227.188	250.177	5.50727	5.54675e+06	5.41685e+06	5.4276e+06	5.4409e+06	5.48162e+06	5.35171e+06	5.32938e+06	5.31879e+06	8.24087e+06	6.24304e+06	5.67763e+06	4.9122e+06	4.88955e+06	6.31922e+06	4.31842e+06	4.58589e+06	5.05231e+06	5.19932e+06	4.90715e+06	5.36464e+06
332	227.188	228.195	10.7873	691418	696905	707588	677123	662158	650903	649535	625755	227066	233336	184341	355130	279716	324716	193987	170968	135482	229740	210173	151943
333	227.224	228.232	5.05109	402430	390263	390453	403459	384922	397698	386593	391457	370388	417468	382046	435025	433464	316622	388270	432909	420756	422796	348834	385895
334	228.133	229.141	4.1075	466097	474726	462391	462945	453768	450079	448481	451592	525765	813375	456160	842890	908413	238875	415263	775345	858127	814455	311396	534832
335	229.132	230.14	17.0946	359307	336597	340321	325100	324683	267758	230039	206867	208274	209017	193157	186435	182007	180911	180574	176092	186787	166823	178979	194571
336	229.24	230.248	5.65173	723864	722639	710503	695284	707741	705011	704052	685240	1.14063e+06	832598	831313	867844	732809	961042	691905	627263	643343	720448	653386	706815
337	231.147	232.154	3.15639	2.16236e+06	2.08913e+06	2.42039e+06	2.36664e+06	2.42408e+06	2.24665e+06	2.47366e+06	2.50612e+06	1.66948e+06	2.51258e+06	3.42271e+06	3.31803e+06	2.65004e+06	2.49401e+06	3.31773e+06	3.41929e+06	2.16317e+06	4.90761e+06	2.26203e+06	3.33473e+06
338	231.889	232.896	0.838358	280199	289816	278224	278723	286077	278936	284781	286352	162346	254274	262033	259699	302556	286568	346174	255704	234440	328386	273416	319672
339	231.9	232.908	0.817933	123201	115360	126969	129258	125445	118277	128721	125866	121049	112881	163769	158497	129123	124047	149313	123228	108009	195802	161390	169268
340	235.155	236.162	5.03051	638443	628168	622573	630579	626824	631366	631949	622128	1.31879e+06	842182	590541	532827	605990	503337	418464	492029	602564	662964	499785	631868
341	235.991	236.998	0.928864	208400	207045	202667	208055	204841	217943	208340	205411	582662	268337	305768	183217	311665	180381	354089	123414	175959	302751	245474	340865
342	237.17	238.177	4.646	141465	140330	138051	139439	142783	136695	140045	134651	317519	273492	255662	172640	108544	167352	100222	93937.9	139530	152448	150964	151251
343	238.156	239.163	7.6156	321861	315173	314930	306979	300566	290731	283122	293867	207963	250225	247254	170319	342067	103465	532507	1.23028e+06	862094	626990	642876	290073
344	241.918	242.925	0.820094	596192	589814	587198	599054	609399	590421	583853	593144	342508	557111	510100	521105	704288	596955	653600	416506	432301	687596	517816	665272
345	242.079	243.087	4.11215	183627	181712	179104	184712	177224	176320	187816	175090	181902	108238	122761	57058.6	103620	313954	194864	120746	77122.7	86133.5	289020	156637
346	243.003	244.01	3.42774	373040	370404	375981	361552	381891	353410	363315	361550	382005	363678	420249	412712	389640	401237	421076	314627	322820	374463	408640	389451
347	243.147	244.154	4.09682	382244	381550	386849	387572	379961	383938	377014	385580	0	1801.44	0	0	1101.72	0	1159.46	0	0	0	0	517.632
348	487.26	244.637	5.55467	184991	171193	171566	184700	176599	186172	174224	175113	246409	0	114816	0	0	285798	464239	60839.7	37177.1	17021.8	777749	334482
349	244.121	245.128	4.01647	284628	281111	277885	284857	288810	292259	286834	283819	58750.1	51170.2	48994.2	44341.9	50557.7	41147.8	23923.8	30033.1	21340.6	38277.9	35811.8	55239.6
350	245.162	246.169	3.65704	1.69591e+06	1.70502e+06	1.69079e+06	1.67762e+06	1.64125e+06	1.69722e+06	1.65378e+06	1.64688e+06	1.58374e+06	1.45613e+06	869652	831369	1.35122e+06	617320	1.45788e+06	4.16753e+06	3.21464e+06	2.41165e+06	1.645e+06	1.53631e+06
351	245.235	246.243	4.803	198430	195496	190960	184489	187992	197268	191457	191045	298785	453232	464977	250238	273004	560240	253127	217928	143612	188280	282323	368675
352	247.142	248.149	1.22576	602528	597105	611172	624034	595482	594996	608164	598916	793199	721964	822671	752395	1.26683e+06	509000	911637	622329	398197	1.25485e+06	488996	780183
353	247.16	248.167	4.58621	240445	234672	248078	247975	237460	231908	241632	241454	202859	412987	219933	269941	444537	124602	459607	104591	123875	458514	325219	434568
354	248.148	249.156	1.02054	226072	218567	209338	227867	227563	214621	202993	220263	605561	207058	202558	154043	248985	197062	120197	126554	270211	174515	146111	101566
355	250.095	251.102	3.86012	166076	171588	174462	176359	171075	168802	173865	173971	309549	134163	146246	88364.9	126130	113961	124353	339291	426223	156345	226008	157023
356	250.094	251.102	4.1613	444310	448563	451645	448581	466595	462530	468765	452449	144928	47148.1	102632	6963.08	20441.2	359975	198204	138665	112547	35841.7	862417	222158
357	250.156	251.164	6.59561	112173	109177	110372	111086	108791	105848	103868	102194	273921	156997	436803	78420	104574	196506	8435.96	3874.94	4032.91	2993.67	22968	12141
358	253.05	254.057	4.19819	665429	663322	671819	667951	654750	666165	650212	660471	3256.46	0	619.032	0	0	1860.22	709.884	2228.42	1545.74	0	0	2089.7
359	254.224	255.232	7.29696	307050	285964	280810	279851	277495	278770	271506	270926	103402	322386	206678	313142	222256	430430	250554	54774.3	58573.6	335209	168278	318316
360	255.256	256.263	5.92279	2.82052e+06	2.76036e+06	2.72359e+06	2.73999e+06	2.71574e+06	2.70087e+06	2.67481e+06	2.71075e+06	2.5295e+06	2.80555e+06	2.60894e+06	2.82528e+06	2.81276e+06	2.72231e+06	2.60931e+06	2.72406e+06	2.6195e+06	2.80665e+06	2.49483e+06	2.53573e+06
361	255.255	256.262	9.93715	467542	467008	463791	474699	508172	507632	525120	510363	581583	424656	642844	417318	470825	892583	478282	419008	450945	450612	595601	445595
362	255.256	256.263	17.0896	347227	335970	336634	327287	321677	297774	272703	264305	267999	240105	239950	245908	243118	243319	234032	233720	239592	213185	239517	240623
363	257.102	280.091	0.990689	3.51608e+06	3.70411e+06	3.68081e+06	3.76083e+06	3.66779e+06	3.64644e+06	3.6077e+06	3.67518e+06	2.81359e+06	4.03174e+06	4.22471e+06	4.56779e+06	4.53986e+06	3.45087e+06	2.80409e+06	2.55638e+06	2.44677e+06	4.35554e+06	2.94325e+06	3.73047e+06
364	257.235	258.242	5.90702	617301	625782	607446	605277	610234	602320	584222	590871	581956	612503	580529	630964	615055	597040	592349	599992	594512	616420	564634	564823
365	258.057	259.064	0.803871	142068	133738	137171	138359	130498	139095	132924	137059	139312	85233.4	99660.4	98568.2	83221.7	80497.5	106398	304560	262362	108505	140866	102300
366	518.335	260.175	3.75439	88261.6	99509.6	94993.5	91550.5	88840.7	92021.2	91790.8	88954.9	0	432061	1362.19	0	0	0	744.417	0	28161.4	135616	32733.6	1372.27
367	259.178	260.185	3.92989	373487	382790	378675	379183	390451	392987	386291	377365	194871	481043	534670	492074	380637	465501	648707	301390	209923	842825	424760	580005
368	260.137	261.144	3.50879	943331	954901	932284	916999	925773	938791	898512	904421	920149	861371	540530	459355	693287	547783	700153	1.79026e+06	1.844e+06	745476	944679	663018
369	261.245	262.253	6.11311	469748	472350	476756	481783	494341	471509	470633	481371	376583	508564	433747	414538	406614	268247	343306	572699	511696	407148	444787	447471
370	262.193	263.2	6.82845	302957	284753	283945	294354	280015	284012	275684	266309	260661	173188	252533	106634	118412	389992	323378	301320	397250	202836	71203	136541
371	262.228	263.235	10.111	302265	325339	324506	344258	338357	309576	326031	330474	216047	309301	318057	294525	353057	590847	382770	163443	145191	340967	325084	372611
372	263.261	264.268	6.77954	4.84858e+06	4.91154e+06	4.88547e+06	5.03217e+06	4.98222e+06	4.9602e+06	4.90321e+06	4.9785e+06	5.21703e+06	5.00459e+06	4.85675e+06	4.35804e+06	4.42219e+06	2.47853e+06	3.46941e+06	5.97798e+06	5.60033e+06	4.35346e+06	4.80462e+06	4.38552e+06
373	265.165	266.172	4.87483	289675	289500	290668	288270	288040	294977	290984	293420	475440	445350	432645	356608	420656	456657	392083	308020	416572	448064	431692	326300
374	531.262	266.638	7.29814	536166	542249	540669	578779	556606	579438	528335	526327	193709	454698	250750	368558	335380	171820	750824	618180	497112	888224	605279	893710
375	266.202	267.209	7.97689	605190	626680	612511	593089	611138	602654	612908	579233	457422	419703	484461	402994	336531	874328	686351	646333	783808	499662	363745	486161
376	533.277	267.646	8.14379	2.6696e+06	2.6127e+06	2.62021e+06	2.58084e+06	2.50925e+06	2.49746e+06	2.38761e+06	2.30243e+06	1.80833e+06	2.57616e+06	2.00661e+06	2.46212e+06	2.47625e+06	1.70791e+06	2.01327e+06	2.00305e+06	2.00048e+06	2.45877e+06	1.94066e+06	2.07825e+06
377	272.077	273.084	4.15857	69447.4	58223.3	58481.7	57222.3	61301.2	50556.9	53507.3	58142.3	900.912	91636.1	0	18677.7	46581.9	0	674.757	330471	280527	86868.3	1167.14	3035.57
378	273.168	274.176	3.7523	361211	361900	380622	378349	358791	366454	376295	367150	0	0	0	0	0	0	0	0	0	0	0	0
379	273.176	274.183	4.98974	522229	516996	516041	527592	505729	486771	498703	515333	233097	399220	262212	213338	350518	206974	1.13636e+06	344917	397602	709660	1.07282e+06	970325
380	273.267	274.274	5.6067	2.14061e+06	2.15289e+06	2.13921e+06	2.14033e+06	2.14231e+06	2.14137e+06	2.13124e+06	2.12811e+06	2.96168e+06	2.44712e+06	2.64469e+06	2.46605e+06	2.27091e+06	2.69906e+06	2.2114e+06	2.12585e+06	2.03685e+06	2.36105e+06	2.27604e+06	2.39667e+06
381	547.235	274.625	7.28909	370252	393997	421624	388928	372812	396285	397955	360293	132157	321917	189339	267819	248421	112154	573770	460291	348571	670985	446229	629160
382	274	275.007	1.28562	283156	284125	302255	294762	296867	294096	304374	304149	209526	431351	539114	354302	588652	390252	262912	73107.5	38096.8	476140	104619	239141
383	275.119	276.126	3.65957	360027	342981	347344	350262	339809	342966	338093	348704	314197	630881	467611	349808	853668	269257	343826	52316.2	42740.6	427353	199731	470904
384	275.191	276.199	5.30858	193582	199735	197679	198388	197415	202164	189705	198137	122026	175358	142773	102967	136459	145898	430500	89322.6	91356.4	231051	423766	334579
385	551.287	276.651	8.15265	1.15043e+06	1.15214e+06	1.11699e+06	1.08928e+06	1.12482e+06	1.11104e+06	1.05199e+06	1.06173e+06	794321	1.08676e+06	893550	1.06517e+06	1.05481e+06	811158	990716	906486	951522	1.04476e+06	876422	951882
386	555.203	278.609	7.41712	299265	315534	329603	289578	278730	301485	309707	258306	395899	264717	451247	377082	286770	278334	277217	334158	322434	246830	342835	355999
387	555.263	278.639	7.14073	403172	368725	353432	380007	368558	365266	332563	320195	468694	253676	533711	267961	212000	668170	493153	168920	140656	317134	575176	851761
388	278.151	279.158	8.21813	7.02005e+06	6.93057e+06	6.94011e+06	6.8735e+06	6.81528e+06	7.04015e+06	6.98955e+06	7.04849e+06	8.46589e+06	6.8809e+06	7.51921e+06	6.71178e+06	7.07744e+06	8.21012e+06	7.29172e+06	7.87933e+06	7.79673e+06	6.57384e+06	7.82075e+06	7.34802e+06
389	278.224	279.232	6.48248	512756	495886	465865	485375	479793	473746	480552	462663	262251	564912	443104	551382	401219	594951	447247	162782	177626	418014	293409	469823
390	278.224	279.231	7.21424	361912	346723	334556	337130	337633	337844	321684	316217	186362	397379	290593	413802	258898	501579	218959	61052.2	64793	244944	170410	263612
391	278.223	279.23	7.60163	540403	498734	490101	509235	477391	497379	479964	485804	259635	448596	507989	298674	451162	188212	572442	284941	397130	498749	215490	299245
392	557.277	279.646	7.68815	5.6276e+06	5.39957e+06	5.38958e+06	5.49211e+06	5.38269e+06	5.25496e+06	5.01314e+06	4.87778e+06	5.32413e+06	4.8416e+06	5.55217e+06	4.71667e+06	4.96651e+06	4.77374e+06	4.84714e+06	3.92705e+06	3.68868e+06	5.3137e+06	5.10637e+06	5.14043e+06
393	558.28	280.147	7.68847	1.5012e+06	1.47612e+06	1.48999e+06	1.49334e+06	1.48431e+06	1.45714e+06	1.33174e+06	1.31653e+06	1.48002e+06	1.32897e+06	1.54903e+06	1.30483e+06	1.34956e+06	1.34501e+06	1.32102e+06	1.07751e+06	1.00214e+06	1.45637e+06	1.3923e+06	1.42691e+06
394	279.147	280.154	3.74686	27686.4	29016.1	27452.2	25923.9	26984.7	27400.7	27299.3	29583.9	29702.6	16047.9	6897.9	5130.82	0	12096.5	13974.8	240533	114930	9220.03	27411.1	6229.58
395	279.256	280.263	6.22643	295218	289594	290555	296493	308048	288760	285301	280323	308244	313057	285035	244197	231872	232057	273495	222220	475699	253119	309613	299317
396	559.292	280.653	8.47776	1.69145e+06	1.62235e+06	1.62854e+06	1.60273e+06	1.55602e+06	1.56264e+06	1.34595e+06	1.38404e+06	1.20998e+06	1.19315e+06	1.32632e+06	1.21153e+06	1.05796e+06	1.27947e+06	1.55325e+06	1.18457e+06	1.05658e+06	1.54222e+06	1.55912e+06	1.77307e+06
397	563.231	282.623	7.35608	628564	595414	564321	576790	558792	582909	517047	496950	671650	565453	778733	633867	565457	619115	495032	470855	537545	410218	534266	501826
398	282.165	300.199	5.36729	1.20351e+06	1.20647e+06	1.1954e+06	1.19708e+06	1.18799e+06	1.1939e+06	1.18818e+06	1.16745e+06	1.32904e+06	1.70057e+06	1.32961e+06	907410	1.36925e+06	1.05715e+06	1.4011e+06	746170	696721	1.19732e+06	2.00373e+06	1.22939e+06
399	283.286	284.294	11.3293	1.03996e+06	1.0147e+06	1.01459e+06	991401	1.00776e+06	954857	916108	882616	946908	719730	1.11708e+06	644962	790037	1.39496e+06	927437	572049	792499	704894	1.33471e+06	702961
400	569.314	285.664	4.93545	155790	146359	150489	134279	152203	138397	145118	137436	168976	3148.27	129292	0	1021.19	253276	395856	95724.6	68122.7	20914.5	382532	235413
401	569.313	285.664	5.14879	282659	281417	276008	284186	278136	270193	275782	274692	204302	578.205	246719	521.592	962.808	174580	715536	93849.5	199074	38508.2	655511	456889
402	286.228	287.236	9.92745	87817.8	89394.7	88957.6	95256.7	98093.3	96838.2	99608.5	97473.1	54084.5	74696	61707.8	98587.8	93167.5	622433	104509	53536.8	50571.6	141235	128417	81938.3
403	573.249	287.632	7.68977	6.28571e+06	6.41443e+06	6.7897e+06	6.32781e+06	6.24599e+06	6.31234e+06	6.32839e+06	5.99545e+06	6.68252e+06	6.00439e+06	7.3059e+06	6.05387e+06	6.34919e+06	6.50312e+06	6.54514e+06	5.11785e+06	4.65671e+06	6.80087e+06	7.05078e+06	7.15756e+06
404	575.265	288.64	8.48247	6.29364e+06	6.37021e+06	6.47054e+06	6.56358e+06	6.45448e+06	6.42516e+06	5.7006e+06	5.81556e+06	5.12383e+06	5.26081e+06	5.92085e+06	5.64475e+06	4.82038e+06	6.14817e+06	7.00263e+06	5.29921e+06	4.84582e+06	7.17073e+06	7.36673e+06	8.4734e+06
405	579.203	290.609	7.35742	493335	533024	525443	480334	454101	489161	477263	430838	587052	516125	716403	591235	486667	576564	478256	427019	508784	373921	519409	481986
406	289.619	290.627	7.60257	498866	534688	558757	517361	496635	533891	514452	511682	648058	295107	613889	365534	290630	761637	708019	450810	499907	351042	738638	761936
407	581.277	291.646	7.60515	1.83861e+06	1.79109e+06	1.77546e+06	1.80263e+06	1.80625e+06	1.80915e+06	1.70893e+06	1.72979e+06	2.03407e+06	934487	2.00468e+06	1.18286e+06	928116	2.45359e+06	2.20817e+06	1.44693e+06	1.56591e+06	1.11083e+06	2.22257e+06	2.28183e+06
408	583.293	292.654	8.07985	282195	277585	287253	295108	309047	313673	283869	268586	473480	159964	446528	196576	249629	430372	378183	200552	150481	351129	460846	584213
409	294.121	295.128	3.57421	457126	488625	456077	456504	467904	463843	464468	455157	573376	488692	402827	335582	497245	403342	476712	478662	554706	509689	464245	392376
410	590.275	296.145	8.13639	7.00097e+06	7.19982e+06	7.4931e+06	7.31317e+06	7.06364e+06	7.15348e+06	6.80676e+06	6.77605e+06	5.36932e+06	7.52982e+06	6.33543e+06	7.55242e+06	7.50744e+06	5.65627e+06	6.546e+06	6.35047e+06	6.47264e+06	7.57931e+06	6.13263e+06	6.48032e+06
411	590.275	296.145	8.20055	7.56648e+06	7.72777e+06	8.02717e+06	7.82754e+06	7.58287e+06	7.64427e+06	7.20803e+06	7.17046e+06	5.60346e+06	8.0283e+06	6.64272e+06	8.00482e+06	7.94605e+06	5.92851e+06	6.87683e+06	6.66303e+06	6.80942e+06	8.039e+06	6.38053e+06	6.75176e+06
412	590.275	296.145	8.20642	7.9122e+06	8.06797e+06	8.34573e+06	8.14317e+06	7.87786e+06	7.93405e+06	7.41144e+06	7.37486e+06	5.72697e+06	8.25994e+06	6.80635e+06	8.23196e+06	8.14497e+06	6.0635e+06	7.06015e+06	6.81683e+06	6.96211e+06	8.29071e+06	6.51418e+06	6.92312e+06
413	590.275	296.145	8.21351	7.19306e+06	7.37831e+06	7.6589e+06	7.49905e+06	7.2338e+06	7.31666e+06	6.94775e+06	6.91042e+06	5.46641e+06	7.72281e+06	6.44348e+06	7.71472e+06	7.66691e+06	5.74715e+06	6.66827e+06	6.46233e+06	6.59986e+06	7.73099e+06	6.21425e+06	6.56954e+06
414	590.275	296.145	8.22352	7.16925e+06	7.35126e+06	7.63184e+06	7.46444e+06	7.2069e+06	7.28223e+06	6.92717e+06	6.89043e+06	5.44577e+06	7.68235e+06	6.41859e+06	7.68071e+06	7.63922e+06	5.73503e+06	6.63942e+06	6.44715e+06	6.57981e+06	7.70624e+06	6.19918e+06	6.55614e+06
415	590.276	296.145	8.25269	7.9845e+06	8.13451e+06	8.40521e+06	8.21332e+06	7.93191e+06	7.99557e+06	7.45398e+06	7.41439e+06	5.75389e+06	8.29809e+06	6.83693e+06	8.27468e+06	8.1853e+06	6.09288e+06	7.10245e+06	6.84846e+06	6.99387e+06	8.34094e+06	6.54153e+06	6.9567e+06
416	590.275	296.145	8.25794	7.44264e+06	7.60864e+06	7.90652e+06	7.71762e+06	7.4717e+06	7.53875e+06	7.13035e+06	7.08861e+06	5.56027e+06	7.92546e+06	6.58233e+06	7.91213e+06	7.85951e+06	5.86837e+06	6.80946e+06	6.59713e+06	6.74741e+06	7.94601e+06	6.31761e+06	6.69008e+06
417	296.177	297.184	4.95535	330963	320314	325716	322097	318366	320074	324994	321538	116213	837531	138694	118922	129459	104347	97021.6	202601	272531	101280	184120	151428
418	298.193	299.2	6.0446	792158	778708	763750	768592	755608	788975	768797	743593	54616.8	1.73213e+06	97488.5	50741.4	40006.4	100976	60449.5	873978	1.55827e+06	58296.6	609615	185921
419	597.248	299.632	7.60592	1.60628e+06	1.67593e+06	1.75727e+06	1.62162e+06	1.64708e+06	1.69207e+06	1.70278e+06	1.63384e+06	2.06571e+06	899316	2.13371e+06	1.26176e+06	964152	2.61523e+06	2.33321e+06	1.48518e+06	1.6206e+06	1.15861e+06	2.40006e+06	2.45875e+06
420	597.273	299.644	6.02161	167053	163321	153733	159490	145455	150159	153518	146635	578578	3369.9	410854	3454.37	611.256	40065.4	305762	173124	271895	12075.7	265172	345394
421	299.191	300.199	5.36011	1.20324e+06	1.20647e+06	1.19459e+06	1.19656e+06	1.18768e+06	1.19295e+06	1.18818e+06	1.16745e+06	1.32864e+06	1.70002e+06	1.32891e+06	907410	1.36799e+06	1.05715e+06	1.40081e+06	745853	696721	1.19732e+06	2.00236e+06	1.22808e+06
422	299.282	282.279	6.80234	3.28335e+06	3.17154e+06	3.19195e+06	3.21929e+06	3.15713e+06	3.1504e+06	3.08204e+06	3.07531e+06	4.50244e+06	3.25362e+06	3.45117e+06	3.1323e+06	2.6397e+06	2.48215e+06	3.11512e+06	2.23514e+06	5.44182e+06	3.19913e+06	3.24547e+06	3.20661e+06
423	599.265	300.64	8.08384	497980	532149	584792	581109	574513	618378	570642	558719	982410	359103	982489	448275	514724	987310	848253	442158	334636	751231	1.08856e+06	1.31395e+06
424	299.888	300.895	0.817926	167967	159387	165271	166912	169325	159048	177409	162804	158162	148741	222861	220316	169458	180242	208437	159745	138606	257819	221247	216332
425	300.11	301.117	4.20179	439141	457003	466354	462837	456823	450508	425607	447395	172950	22275.7	144353	1416.67	17575.1	761511	296957	80734.6	61189	19364	709032	307032
426	300.208	301.215	7.43158	576864	542948	542936	530691	536538	536068	505378	501693	235394	357861	242794	280336	269769	402014	504149	551545	630629	503689	337560	383606
427	301.207	302.215	5.77179	1.56408e+06	1.55115e+06	1.54207e+06	1.56248e+06	1.5529e+06	1.51117e+06	1.50747e+06	1.5183e+06	1.342e+06	2.11546e+06	1.41352e+06	1.0518e+06	1.44556e+06	1.02281e+06	2.24773e+06	668818	758800	1.72899e+06	2.61749e+06	2.09433e+06
428	301.261	302.269	5.86794	1.54543e+06	1.53454e+06	1.52096e+06	1.541e+06	1.57054e+06	1.57391e+06	1.53833e+06	1.54173e+06	1.5653e+06	1.65937e+06	1.60864e+06	1.68443e+06	1.69513e+06	1.64254e+06	1.64355e+06	1.67258e+06	1.65735e+06	1.72336e+06	1.63864e+06	1.64721e+06
429	301.298	302.305	7.01985	1.94989e+06	1.77795e+06	1.71791e+06	1.76198e+06	1.74215e+06	1.7179e+06	1.63817e+06	1.62468e+06	1.8794e+06	1.53281e+06	1.99829e+06	1.5074e+06	1.27146e+06	1.11463e+06	2.23664e+06	1.40632e+06	3.68704e+06	2.01113e+06	1.95187e+06	1.98196e+06
430	302.223	303.23	7.97538	2.70795e+07	2.70957e+07	2.72601e+07	2.70191e+07	2.67079e+07	2.67478e+07	2.68011e+07	2.65085e+07	2.05257e+07	1.93377e+07	2.18356e+07	1.81039e+07	1.55729e+07	4.10211e+07	3.09277e+07	2.96382e+07	3.4671e+07	2.20122e+07	1.63629e+07	2.16095e+07
431	605.276	303.646	7.53523	2.24023e+06	2.24144e+06	2.25264e+06	2.21432e+06	2.24904e+06	2.16846e+06	2.12821e+06	2.01489e+06	2.29759e+06	1.6238e+06	2.1872e+06	1.64487e+06	1.38458e+06	2.83998e+06	2.46462e+06	1.40413e+06	1.63585e+06	1.64138e+06	2.14783e+06	2.08166e+06
432	304.149	305.156	3.54125	636915	642127	656213	644280	638412	648927	623935	630355	649380	616048	581639	604047	601070	580003	613414	591322	575624	564973	633443	569863
433	304.239	305.246	8.47574	344880	324245	330099	318843	324546	328082	315965	320413	104378	119223	158794	138886	89596.7	195955	651764	359592	454104	303531	246401	382873
434	304.239	305.246	9.91833	854387	839469	871486	870791	962105	970876	943095	960715	536696	778135	546997	1.01497e+06	883164	5.98113e+06	952391	470939	430632	1.27453e+06	1.05743e+06	800251
435	612.151	307.083	1.21794	770234	762976	800749	782657	764747	778683	779033	783504	2.16414e+06	1.06109e+06	4.64854e+06	1.59146e+06	2.84859e+06	2.93156e+06	900361	359917	341367	1.83372e+06	800454	948541
436	308.234	309.241	9.78548	109262	104579	103571	101838	112051	106759	111938	110393	103323	26807	192142	8185.3	51983.5	233049	268303	32839.2	90763.2	66895.5	734937	136478
437	618.307	310.161	9.6386	6.67286e+06	6.68215e+06	6.63806e+06	7.20226e+06	6.70076e+06	6.07794e+06	5.58599e+06	5.5983e+06	5.25286e+06	6.4355e+06	6.26254e+06	7.45227e+06	6.68416e+06	5.02232e+06	5.26558e+06	4.46294e+06	4.90359e+06	6.62775e+06	4.40468e+06	4.80011e+06
438	618.306	310.16	9.72946	4.90183e+06	4.99249e+06	5.14503e+06	5.67989e+06	5.43248e+06	5.16576e+06	4.79875e+06	4.88935e+06	4.61061e+06	5.57151e+06	5.49093e+06	6.42654e+06	5.8038e+06	4.44374e+06	4.68959e+06	4.00668e+06	4.39924e+06	5.84607e+06	3.95564e+06	4.35389e+06
439	309.23	310.237	5.26615	737872	738445	747541	728285	723950	733980	751161	718996	727185	767976	754483	759853	774086	712335	718068	732285	757740	769171	676174	733632
440	309.302	310.309	11.416	1.88104e+06	1.88757e+06	1.79008e+06	1.80224e+06	1.74968e+06	1.63986e+06	1.61784e+06	1.58107e+06	2.54315e+06	1.94552e+06	3.78815e+06	2.32751e+06	2.57532e+06	5.25271e+06	1.03169e+06	1.01443e+06	712743	1.73151e+06	1.61926e+06	1.39424e+06
441	621.249	311.632	7.53699	2.00433e+06	2.0988e+06	2.28545e+06	2.10362e+06	2.0321e+06	2.09705e+06	2.15661e+06	1.992e+06	2.24529e+06	1.62755e+06	2.33776e+06	1.76517e+06	1.47433e+06	3.00805e+06	2.68296e+06	1.46988e+06	1.72666e+06	1.79776e+06	2.30329e+06	2.29745e+06
442	621.274	311.644	5.98238	169293	170602	180068	163834	165800	163342	161170	161210	645043	2515.32	475880	1346.09	3319.13	63296.8	447921	87998.1	172206	5767.61	268367	275097
443	311.318	312.325	12.6536	1.10853e+06	1.05113e+06	1.0379e+06	1.01448e+06	1.02764e+06	976769	953090	872597	1.20189e+06	867346	1.34695e+06	875484	927241	1.66038e+06	622522	557825	532797	794275	842382	751809
444	312.028	313.036	0.799301	214407	210917	211686	205960	197795	198962	203832	209171	233696	124555	128152	101986	91375.1	147606	161406	404555	389366	158477	291504	185736
445	312.146	313.154	7.8249	548.4	0	0	0	0	0	0	0	104704	4291.31	229653	2893.97	997.8	132715	378372	539.232	3829.84	2509.66	621.264	72844.5
446	312.146	313.153	8.02842	864.696	0	0	0	0	0	607.419	577.395	131308	33136.7	261842	25128.1	15368.1	135708	438526	8711.69	37586.6	20870.7	2336.83	100683
447	312.266	313.273	7.8731	911875	904584	887468	890735	920763	927200	875214	877090	567421	909051	761010	1.00781e+06	828395	1.1176e+06	929350	870704	948786	892859	747258	673773
448	314.188	347.221	4.95867	1.75865e+06	1.76745e+06	1.74967e+06	1.75803e+06	1.73977e+06	1.72597e+06	1.75527e+06	1.72972e+06	2.16247e+06	1.9461e+06	1.4134e+06	1.08897e+06	1.1904e+06	739370	1.85577e+06	2.62645e+06	2.77542e+06	1.92371e+06	1.95674e+06	1.9584e+06
449	314.188	315.195	7.27403	277124	265263	263349	270881	267700	254535	245617	245093	29490.4	542953	25820.4	5954.71	14391	53118.7	9602.12	85770.7	457172	10164.6	29869.8	23758.2
450	315.24	316.248	5.22173	238465	228263	238869	238518	245209	235224	234824	230337	176372	187205	244975	136973	140429	187147	382916	197814	321578	254782	339063	370840
451	316.128	317.135	6.1744	1.02227e+06	994730	954833	966877	976886	968028	935592	917558	809485	994821	944399	1.00665e+06	975831	852729	952504	917069	971243	983995	836332	820055
452	316.239	317.247	9.12754	412116	397977	392584	384330	389129	351821	319448	299133	284260	113665	455704	190161	125022	658832	368824	175287	291650	209233	246193	601771
453	317.183	318.19	3.62032	120463	113944	120913	118114	122645	121016	120333	124030	90600.8	122139	122543	67867.9	86363.1	112137	205781	63810.6	46492.6	183049	248839	294060
454	317.292	318.3	5.65341	745761	731465	733786	725332	743054	726812	730943	714499	727392	715865	803913	707255	728389	749686	750938	679997	661301	780774	695027	723830
455	318.219	319.226	5.55959	283238	290900	287923	285933	278335	285172	282897	292415	146204	174975	224556	101018	114000	569895	402142	594423	392630	322354	78488.3	115312
456	318.255	319.262	11.5446	1.55004e+06	1.3642e+06	1.48846e+06	1.52046e+06	1.52043e+06	1.40655e+06	1.32321e+06	1.15999e+06	621882	603328	1.08853e+06	655774	491355	1.87942e+06	1.23836e+06	628804	781482	678353	1.86326e+06	3.15809e+06
457	320.306	338.34	12.7352	3.8534e+07	3.78095e+07	3.72832e+07	3.6705e+07	3.65696e+07	3.56727e+07	3.48874e+07	3.21081e+07	4.69317e+07	3.7675e+07	6.04986e+07	4.04375e+07	4.08688e+07	6.7799e+07	2.21756e+07	1.96905e+07	1.75778e+07	3.25687e+07	2.96311e+07	2.86802e+07
458	325.144	326.151	4.5968	659204	638493	639892	651716	654967	650402	622769	652231	8587.28	26890.1	44954.1	36908.7	18481.5	1046.74	48736.7	3471.36	39028.2	31015.9	9666.29	3360.7
459	326.044	327.051	0.797001	560491	543638	534699	551825	547545	527921	537530	539458	538978	331174	382957	377760	325418	322779	410846	1.23523e+06	1.10118e+06	412845	582575	382151
460	326.223	327.231	7.86226	4.48135e+06	4.33551e+06	4.47403e+06	4.56975e+06	4.62126e+06	4.42371e+06	4.28248e+06	4.31124e+06	2.81521e+06	2.95649e+06	2.59957e+06	2.02294e+06	1.98152e+06	2.07439e+06	4.31003e+06	3.76643e+06	6.85185e+06	3.48873e+06	2.17383e+06	2.57825e+06
461	327.24	328.248	5.17626	66823.7	66299.2	60405.1	66420.9	63061.1	65260.9	61472.1	62221	53553.2	43933.4	38444.1	38542.1	28014.7	64717	165020	62812.9	54237.5	116204	438070	126253
462	328.239	329.246	8.09271	379914	375967	395380	395389	399978	392442	362864	362663	329742	260616	348594	173821	192931	229549	336593	332898	557664	242844	192426	234249
463	328.239	329.246	8.38698	475227	486342	504113	523428	526698	529208	516010	510573	395771	272610	390791	319536	203457	474238	577757	470985	892801	431926	310084	369656
464	328.238	329.246	9.68944	1.21903e+06	1.12816e+06	973447	955055	926870	854903	831090	866881	348568	793979	317169	732325	648528	1.81949e+06	842078	566563	612786	1.03805e+06	704348	556416
465	329.256	330.263	6.18045	1.68588e+06	1.67354e+06	1.65222e+06	1.64966e+06	1.63774e+06	1.63248e+06	1.61188e+06	1.60514e+06	1.58757e+06	1.62893e+06	1.62372e+06	1.65661e+06	1.62235e+06	1.53697e+06	1.57038e+06	1.51514e+06	1.54068e+06	1.58101e+06	1.47877e+06	1.47144e+06
466	329.329	330.336	7.32271	336899	319533	314976	317796	314542	314705	305305	294697	390927	215533	197845	235184	256525	232813	181773	193354	303935	194792	258952	178767
467	330.183	331.19	4.99573	76640.2	72908	76287.5	75549.6	73864.5	75176.1	73467.8	70392.8	935.712	1570.15	475.68	0	0	1364.08	15765	292147	321488	4888.16	16860.9	2055.12
468	330.255	331.262	8.616	1.16267e+06	1.19e+06	1.241e+06	1.26847e+06	1.27748e+06	1.28729e+06	1.21811e+06	1.22138e+06	919747	770263	1.0722e+06	598189	523200	657388	1.11845e+06	1.14425e+06	2.29279e+06	881251	570364	753649
469	332.198	333.205	5.14904	276055	273025	271548	267144	276824	254207	264621	251829	3496.44	20386.3	4450.37	639.117	1535.95	8558.78	238069	1.18768e+06	1.01258e+06	38255.6	187472	21994.7
470	333.132	334.139	3.67274	163861	165609	167736	164909	158168	163685	160289	157730	204539	152472	182653	96151.5	206587	251665	349188	71971	84273.4	190654	196932	147940
471	334.229	335.236	4.28358	326227	321216	337221	326433	325727	325549	329743	322543	725784	0	613961	0	463.32	1.77665e+06	701868	0	0	541.296	1.07955e+06	639554
472	335.318	336.325	11.6795	388354	387802	371787	366190	357394	322832	328665	308030	511402	374686	747936	426971	453054	890935	214840	187892	143411	317059	289429	285392
473	336.227	337.235	6.48249	557632	539641	529786	535701	540666	539449	516852	533298	224202	682071	499362	684512	422192	743644	468967	50724.4	58206.6	433712	247724	548611
474	336.244	337.251	4.16086	2.71549e+06	2.76254e+06	2.72526e+06	2.78187e+06	2.7664e+06	2.75122e+06	2.74096e+06	2.81633e+06	5.25619e+06	1475.09	4.84613e+06	533.256	556.44	1.36018e+07	5.31885e+06	21086.2	29329.6	4011.8	9.52725e+06	4.63134e+06
475	336.244	337.251	4.50535	2.53606e+06	2.53107e+06	2.51785e+06	2.51757e+06	2.5016e+06	2.49181e+06	2.47759e+06	2.47928e+06	5.16668e+06	1458.99	4.32588e+06	593.904	0	1.28841e+07	3.51331e+06	12979.3	26191.3	0	8.81048e+06	4.00504e+06
476	336.265	337.273	7.25963	1.31989e+06	1.28111e+06	1.26143e+06	1.29926e+06	1.26501e+06	1.27722e+06	1.22119e+06	1.21136e+06	1.7557e+06	1.54992e+06	1.88164e+06	1.33248e+06	1.53198e+06	1.06421e+06	904605	960259	796317	1.18523e+06	1.38925e+06	1.40884e+06
477	336.265	337.273	7.42767	1.26119e+06	1.22137e+06	1.21142e+06	1.2541e+06	1.2076e+06	1.23919e+06	1.18598e+06	1.15905e+06	1.67902e+06	1.4851e+06	1.78545e+06	1.28812e+06	1.48767e+06	1.02853e+06	876539	933272	776371	1.15374e+06	1.33455e+06	1.36537e+06
478	337.333	338.341	11.0105	4.50021e+06	4.42453e+06	4.47021e+06	4.3741e+06	4.30019e+06	4.25433e+06	4.2822e+06	4.13475e+06	3.55085e+06	4.05338e+06	3.99705e+06	3.89339e+06	3.94278e+06	3.93745e+06	4.07325e+06	3.4018e+06	3.35159e+06	3.97297e+06	3.90941e+06	4.00425e+06
479	337.333	338.34	12.735	3.8534e+07	3.78095e+07	3.72832e+07	3.6705e+07	3.65696e+07	3.56727e+07	3.48874e+07	3.21081e+07	4.69317e+07	3.7675e+07	6.04986e+07	4.04375e+07	4.08688e+07	6.7799e+07	2.21756e+07	1.96905e+07	1.75778e+07	3.25687e+07	2.96311e+07	2.86802e+07
480	338.26	339.267	5.19859	191257	192092	189562	192963	197523	192550	186136	185853	865042	0	547031	454.152	0	1.7842e+06	218015	0	585.36	0	948871	480318
481	339.073	340.08	3.60288	586446	600156	600577	586080	597238	603004	580359	599843	112372	74047.7	92154.9	14521.6	49611.7	126550	101233	83174.5	103628	108486	143904	197891
482	339.073	340.08	3.70928	585345	595308	596128	582934	596819	599576	575797	596034	111975	74047.7	90034.5	13823.1	49611.7	125129	99507.8	82253	101910	106542	143113	197509
483	339.349	340.357	14.0763	1.0385e+06	945081	910559	906693	885072	873148	833403	780595	1.20428e+06	780874	1.29305e+06	771894	847043	1.55184e+06	584469	555011	553745	707306	728005	706683
484	340.296	341.304	8.79063	1.00237e+06	1.03444e+06	995493	980251	908423	809169	702509	669327	497497	779256	631152	971552	794881	867262	600328	565943	713419	590842	520139	421188
485	340.297	341.304	9.02031	2.44921e+06	2.44172e+06	2.41286e+06	2.4595e+06	2.49814e+06	2.42242e+06	2.15768e+06	2.12431e+06	1.57696e+06	2.57881e+06	2.11798e+06	3.13214e+06	2.52296e+06	2.61331e+06	1.81333e+06	1.70932e+06	2.16923e+06	1.85641e+06	1.53247e+06	1.24236e+06
486	340.297	341.304	10.723	3.82056e+06	3.77802e+06	3.69092e+06	3.6388e+06	3.49555e+06	2.76717e+06	2.69749e+06	2.38597e+06	749414	1.2224e+06	671467	1.15713e+06	986289	1.22123e+06	1.38651e+06	1.27296e+06	1.3693e+06	1.12628e+06	1.63932e+06	1.19863e+06
487	340.297	341.304	10.8344	3.75301e+06	3.71241e+06	3.61944e+06	3.57131e+06	3.42921e+06	2.70717e+06	2.63944e+06	2.32991e+06	715120	1.18145e+06	632810	1.08952e+06	928384	1.16302e+06	1.31843e+06	1.20776e+06	1.30177e+06	1.07012e+06	1.5691e+06	1.15159e+06
488	341.256	342.263	5.57858	268548	258888	268800	259929	261242	261455	260468	259591	158067	229936	218714	137958	133990	223648	484086	256104	213590	241908	734992	399987
489	342.254	343.262	11.1921	2.85306e+06	2.58021e+06	2.78343e+06	2.75786e+06	2.78255e+06	2.41003e+06	2.37518e+06	2.18333e+06	935334	1.45298e+06	2.02873e+06	1.42319e+06	1.0301e+06	2.49208e+06	2.01874e+06	1.06537e+06	1.5075e+06	1.29575e+06	2.41069e+06	3.74161e+06
490	343.272	344.279	6.06729	529092	543954	531339	531797	532601	526316	523436	524295	409245	432037	519185	314290	356639	384702	905221	340267	445649	616132	909654	965246
491	344.141	345.148	0.789822	40210.4	38323.7	41827.4	36485.5	40785.1	40117.9	40654.5	40978.7	41179	11756.7	16250.3	11917.3	8252.45	17298.7	23510.1	219825	177051	26129.1	70265.1	27232.4
492	345.16	346.168	5.48715	206196	197012	200144	207065	211890	205889	200355	197239	390312	365849	375138	266700	522564	247414	266267	139760	128789	397641	364237	391307
493	347.072	348.079	0.842212	275576	291944	281078	301230	280172	286078	274099	295746	241029	269879	262931	305185	259087	255234	244870	250324	240510	286601	285844	303238
494	348.175	349.182	3.59236	830124	832013	825753	813466	815166	836338	802799	807687	857435	825418	794992	808101	805719	763886	797679	789245	789685	760487	814166	747362
495	348.23	349.237	4.51011	471979	470571	475657	467061	476504	467016	472401	449595	212637	1.07394e+06	240972	411205	593513	147261	373574	1.40723e+06	1.4107e+06	742226	397691	554901
496	351.892	430.913	0.831105	931249	913413	916617	927345	889482	899830	891136	907659	889184	1.00636e+06	846426	908418	850980	1.00187e+06	880870	594331	641843	727660	885698	877349
497	352.239	335.236	4.33737	320880	316689	337350	327508	317231	321594	323922	317785	718362	0	606517	566.217	0	1.74991e+06	678618	0	0	541.296	1.05615e+06	631040
498	352.24	353.247	5.1	94648.8	92393.6	92984.7	95135.8	86477.8	94949.9	98756.3	92451.8	55669.1	0	56609.3	0	0	182726	362051	30569.5	4167.07	0	494670	195955
499	352.24	353.247	15.3974	1.02694e+06	983755	962097	978896	977222	923122	843185	816397	673122	874451	1.02613e+06	1.07156e+06	959297	864963	843161	682543	534278	977146	825700	1.06506e+06
500	354.061	355.069	11.9998	586023	569075	574888	575645	564271	543756	525535	425528	152016	144460	132399	117404	105074	125325	101721	106769	107985	87080.6	96851.6	99722.2
501	354.255	355.263	4.17984	1.17805e+06	1.20165e+06	1.18735e+06	1.21607e+06	1.15637e+06	1.19396e+06	1.18603e+06	1.19589e+06	1.54502e+06	481.416	1.58611e+06	0	0	2.96589e+06	2.18383e+06	10540	10181.4	533.493	2.66866e+06	1.58302e+06
502	354.255	355.262	5.55176	2.46406e+06	2.40507e+06	2.42921e+06	2.44677e+06	2.45878e+06	2.39488e+06	2.38467e+06	2.41397e+06	3.37517e+06	34859	1.46493e+06	2023.09	1041.17	3.98629e+06	6.63984e+06	773915	457945	206374	1.44415e+07	4.97736e+06
503	356.142	357.149	7.97749	1.00813e+06	1.03975e+06	1.0868e+06	1.03815e+06	1.02393e+06	1.06297e+06	1.04897e+06	1.04498e+06	938362	816807	958516	759480	696909	1.70775e+06	1.30537e+06	1.31183e+06	1.49324e+06	884294	731570	949540
504	356.271	357.278	4.74932	53645.6	53219.5	50965.4	54074.5	51659.2	52855.3	57587.8	55658	74167.1	0	56344.7	0	0	174171	166384	0	0	0	316346	140623
505	356.271	357.278	6.79305	232513	215190	227926	231493	216780	222448	214326	219092	1.44118e+06	139259	109785	47618.5	48391.8	270958	77271.1	355274	363753	64052.4	1.05934e+06	633670
506	357.22	358.227	5.66605	7821.73	9377.32	10993.1	12514.3	13182.5	12677.7	14215.5	7841.59	19816.5	487.296	0	1392.96	620932	6633.52	2391.43	7981.42	1146.24	0	1622.71	44157
507	357.251	358.258	4.94472	136395	133357	134131	134807	142590	139814	137371	137255	184628	107318	214297	92445.6	65309.9	354573	320024	108322	142557	159672	733988	250136
508	357.36	358.367	8.09144	258770	258255	265628	275616	267008	280684	271702	266184	392466	143638	124547	177665	194063	168908	117990	143699	263959	116561	237546	117372
509	358.158	359.165	9.9345	230265	233951	242770	275362	281420	292060	357403	345715	238467	296213	241888	339832	345854	1.23098e+06	386376	252463	241212	484740	443980	387800
510	358.212	359.219	5.55937	186465	187067	197075	203628	189836	192624	189516	197620	90789.2	67272.8	160282	73289.4	76914.3	510731	490576	499176	261771	236996	47367.7	72972.3
511	358.211	359.219	7.22109	510154	479894	448664	461650	467529	475494	442375	436259	165127	368607	306434	189625	162190	654594	471805	461666	574247	282604	257087	322514
512	360.131	361.138	3.99047	278857	268325	267319	279167	269011	274956	270192	271062	182478	112555	166430	28815.9	118300	140353	78671.9	54965.8	91429.6	113554	152777	155098
513	360.265	361.272	7.34874	3.48217e+06	3.48223e+06	3.41891e+06	3.48905e+06	3.48919e+06	3.49985e+06	3.40095e+06	3.39598e+06	3.12236e+06	3.13124e+06	3.19266e+06	3.01287e+06	2.63341e+06	3.27953e+06	2.8591e+06	2.70491e+06	2.51964e+06	3.54631e+06	3.59759e+06	3.7711e+06
514	360.266	361.273	7.55679	1.917e+06	1.87663e+06	1.83768e+06	1.83881e+06	1.85086e+06	1.83647e+06	1.76339e+06	1.75543e+06	1.45126e+06	1.62129e+06	1.48289e+06	1.53995e+06	1.34819e+06	1.38958e+06	1.35406e+06	1.43143e+06	1.30471e+06	1.86503e+06	1.70593e+06	1.8602e+06
515	361.919	362.926	0.816243	749085	743600	750373	761667	748959	734569	732945	724307	737043	801154	715762	754496	711596	835340	720193	514782	546349	607849	759281	718310
516	361.919	362.926	17.0887	1.56407e+06	1.38512e+06	1.37117e+06	1.34392e+06	1.32587e+06	1.11296e+06	916790	788025	821022	792653	695099	647953	626180	643668	626864	610041	637423	558596	606827	659573
517	362.209	363.216	4.62396	518353	530798	535094	537837	529443	528922	520408	529005	141625	60160.7	81133.4	38356.5	62472.4	262614	1.35206e+06	1.12524e+06	765729	226250	1.70946e+06	555988
518	365.365	366.372	14.1469	485541	460171	454960	450814	442702	453042	426469	399813	636219	491510	828463	552240	598737	1.1021e+06	289773	256998	224502	427379	396328	379134
519	366.237	367.245	5.89534	624494	639095	645557	664644	655457	654696	660761	665581	555.144	874.53	0	501.72	498.936	605.448	632.124	0	0	0	1403.74	0
520	366.328	367.335	11.6085	1.28174e+06	1.31017e+06	1.2628e+06	1.24528e+06	1.19626e+06	976626	968575	798453	37361.9	8099.62	8159.68	3297.38	0	21232.2	686.124	6335.65	2039.62	0	8557.98	509.28
521	367.272	368.279	5.97389	563048	568998	563880	557232	561659	541522	550618	561356	366749	609125	461198	400771	413530	520323	910816	258278	262512	525239	1.4949e+06	814418
522	367.272	368.279	6.00566	556680	559436	553166	549557	550410	532145	536365	543912	364337	593060	454141	394435	406010	513698	883867	255550	261392	504541	1.44258e+06	791731
523	367.875	368.882	0.817132	137493	143800	140943	138951	138084	136961	146557	138003	136006	131251	188862	189903	146601	145573	175721	127504	124690	224759	181366	176741
524	368.134	369.141	4.81777	375810	374707	360087	368570	363715	365515	349103	367341	109465	10500.1	119687	1782.81	5652.62	1.14554e+06	309545	79594.1	52545.8	9063.65	1.35864e+06	509178
525	368.343	369.351	11.0298	420586	4.29676e+06	4.30193e+06	4.3067e+06	4.16413e+06	3.10082e+06	2.95073e+06	2.43047e+06	1.98116e+06	448607	245568	158911	122585	99293.2	106716	174514	208911	201297	152045	177972
526	368.343	369.351	14.9877	2.77089e+06	3.66848e+06	3.65312e+06	3.65737e+06	3.67315e+06	3.4796e+06	3.21416e+06	2.98053e+06	989952	183983	73369.4	34102.6	32585.1	24466.4	29236.6	32241	48204.3	42313.3	32693	56480.2
527	368.343	369.351	16.3676	1.54479e+07	1.49738e+07	1.50203e+07	1.51409e+07	1.53249e+07	1.4814e+07	1.39828e+07	1.38023e+07	1.40463e+07	8.18886e+06	9.55465e+06	8.89813e+06	8.21191e+06	1.51261e+07	1.27457e+07	1.20691e+07	1.35546e+07	9.70086e+06	1.26955e+07	1.30578e+07
528	368.343	369.35	16.4467	1.45281e+07	1.3973e+07	1.40038e+07	1.41045e+07	1.42659e+07	1.38441e+07	1.30623e+07	1.2923e+07	1.37585e+07	8.08385e+06	9.46159e+06	8.83992e+06	8.1723e+06	1.50184e+07	1.26647e+07	1.1987e+07	1.34447e+07	9.64338e+06	1.26076e+07	1.29678e+07
529	368.343	369.35	16.543	1.45961e+07	1.41034e+07	1.41555e+07	1.424e+07	1.44194e+07	1.39849e+07	1.32129e+07	1.30489e+07	1.39403e+07	8.14909e+06	9.53209e+06	8.91333e+06	8.22741e+06	1.51873e+07	1.27897e+07	1.21106e+07	1.35954e+07	9.7253e+06	1.27401e+07	1.31046e+07
530	368.343	369.351	16.5923	1.3057e+07	1.27198e+07	1.27122e+07	1.27132e+07	1.29178e+07	1.25964e+07	1.18911e+07	1.17633e+07	1.31284e+07	7.89442e+06	9.27006e+06	8.72656e+06	8.09061e+06	1.46335e+07	1.23426e+07	1.17636e+07	1.30948e+07	9.5407e+06	1.23962e+07	1.26843e+07
531	369.287	370.295	6.43762	2.43859e+06	2.4179e+06	2.41328e+06	2.39309e+06	2.37154e+06	2.38363e+06	2.35868e+06	2.33139e+06	1.24079e+06	1.90616e+06	1.92225e+06	1.40588e+06	1.3032e+06	1.40063e+06	4.27039e+06	1.43406e+06	1.7706e+06	2.3745e+06	4.32755e+06	4.36977e+06
532	370.25	371.257	15.3966	835516	812006	802870	797574	816217	757015	698011	664977	559741	724158	878712	910710	778457	728325	693054	575437	450542	802892	681139	883414
533	740.512	371.263	17.1462	0	551.637	0	497.112	516.624	383418	528853	504580	528898	523675	453024	398246	308601	312170	356126	313735	349426	233555	390043	303680
534	371.235	372.243	6.04506	16340.1	14332	16600.1	14548.1	16976.3	13819.3	14600	17423.4	30996.7	2703.89	0	908.523	822333	12471.1	4581.82	8112.15	7634	0	2559.65	63480.9
535	371.303	372.31	6.92415	2.7088e+06	2.62637e+06	2.58715e+06	2.66286e+06	2.64595e+06	2.61108e+06	2.50623e+06	2.5009e+06	1.91772e+06	2.08717e+06	2.28212e+06	1.70222e+06	1.78716e+06	1.6168e+06	4.11397e+06	1.64382e+06	2.18607e+06	2.9517e+06	3.80849e+06	4.72232e+06
536	372.266	355.263	4.92822	1.12313e+06	1.12507e+06	1.10788e+06	1.12678e+06	1.13578e+06	1.12863e+06	1.11832e+06	1.11439e+06	1.28433e+06	37446.1	954819	10794.9	8322.55	2.45307e+06	3.4534e+06	607654	394077	164606	3.66987e+06	1.94119e+06
537	372.265	373.273	5.55289	1.14981e+06	1.12661e+06	1.10895e+06	1.12153e+06	1.13844e+06	1.13822e+06	1.09764e+06	1.11958e+06	1.64733e+06	14308.3	693896	0	520.344	1.87035e+06	3.12004e+06	373598	221304	113546	6.55257e+06	2.29807e+06
538	375.251	398.241	6.14591	7.54808e+06	7.18663e+06	7.19323e+06	7.32918e+06	7.20625e+06	7.1132e+06	7.03244e+06	6.95506e+06	9.29724e+06	5.62146e+06	5.45034e+06	5.40472e+06	5.15664e+06	9.29387e+06	5.23235e+06	7.85491e+06	4.81887e+06	5.4579e+06	7.47461e+06	8.84103e+06
539	376.137	377.144	3.63889	188747	194352	195426	192476	191445	197393	190301	198333	368691	181621	355160	164204	156974	656095	325097	223601	200819	226953	477000	322266
540	376.222	377.229	5.85005	517080	497353	493278	507039	506706	501773	501176	491310	460373	430504	567600	170260	436226	447444	465746	487203	380613	615773	258056	291459
541	376.261	341.247	4.6804	80090.2	78966.6	79229.2	81900.7	77123.8	80988.1	83242.8	80688.8	22739.7	0	8646.11	0	0	33941.3	165799	438804	275757	12747.3	109980	59080
542	377.232	378.24	6.11343	524783	522805	526394	529655	526057	521998	517530	524956	394839	575841	452973	443376	464533	278931	378975	647070	558523	447178	497428	489992
543	377.892	378.9	0.818185	155243	163371	148581	156781	153441	155699	154687	154142	95589	161463	130953	136448	190913	167199	168146	100235	106382	171897	127507	173893
544	378.204	379.211	4.03073	87686.9	86977.8	89840.5	85014.6	85283.5	90900	86250.9	90137.5	541.704	590.808	1780.7	0	0	1802.26	389727	25344.9	43497.6	1173.48	137039	3643.37
545	379.248	380.256	6.77714	4.19201e+06	4.15953e+06	4.22535e+06	4.31487e+06	4.24901e+06	4.27358e+06	4.05952e+06	4.07551e+06	4.23299e+06	4.13315e+06	4.02528e+06	3.62326e+06	3.70286e+06	1.98358e+06	2.79385e+06	5.15218e+06	4.59742e+06	3.6684e+06	3.99522e+06	3.61685e+06
546	380.069	381.076	4.07323	1.09231e+06	1.07663e+06	1.06645e+06	1.04884e+06	1.05346e+06	1.04299e+06	1.05878e+06	1.04061e+06	585728	556248	435374	390946	1.00135e+06	114173	423818	1.47662e+06	3.1453e+06	955823	639717	542142
547	380.143	381.15	7.86114	601300	610661	651182	634635	642978	653920	614887	616642	426792	435785	391925	322408	319369	329722	639008	607437	1.02832e+06	508936	320978	375836
548	381.264	382.271	7.02389	2.83238e+06	2.80311e+06	2.72982e+06	2.84888e+06	2.79511e+06	2.76823e+06	2.62265e+06	2.6447e+06	2.20573e+06	2.36665e+06	2.42557e+06	2.00599e+06	2.20045e+06	891862	1.8401e+06	4.28759e+06	3.69174e+06	2.50641e+06	3.0982e+06	2.22174e+06
549	382.066	383.073	4.07315	672558	659858	661140	655329	665943	647232	654008	648593	370291	341663	260851	261688	638418	70719.3	266844	930126	1.95567e+06	589355	404168	343950
550	382.108	383.115	0.88615	134341	137271	142426	137199	141049	140204	146215	142773	477413	320541	668911	358131	598134	331619	49100.9	6159.09	14741.7	181749	24665.5	36648.5
551	382.157	383.165	9.69061	380713	332049	294146	280357	220125	300607	299263	274527	215365	241721	134039	162970	185815	469181	221855	228663	215609	227536	238174	193584
552	382.322	383.329	12.0534	1.08941e+07	1.09379e+07	1.07311e+07	1.06872e+07	1.03623e+07	9.27302e+06	9.20516e+06	7.62591e+06	747816	327766	204964	172951	79894.6	133667	34482.9	36968.6	31130.2	22711.4	27755.4	30338.3
553	382.323	383.33	12.8902	5.18649e+06	5.12743e+06	5.11492e+06	5.10435e+06	5.2518e+06	4.81758e+06	4.74092e+06	3.99983e+06	375595	232906	198913	183572	22896.2	29322.9	4079.96	6326.42	1733.5	2776.73	3589.96	2813.33
554	383.338	406.328	11.0103	1.65872e+07	1.54805e+07	1.5158e+07	1.45826e+07	1.35068e+07	9.88016e+06	9.5182e+06	7.50713e+06	6.23939e+06	6.7872e+06	6.20286e+06	5.35888e+06	5.24524e+06	5.12345e+06	5.56588e+06	4.53248e+06	4.59712e+06	4.42459e+06	4.73776e+06	4.72041e+06
555	384.063	385.07	4.07432	97383.1	101886	98489.3	103186	101436	104854	107298	96374.9	58907.8	54985.1	40280.9	36525.6	97057.3	5962.49	41553.5	141284	310388	92539	63057.6	61549.6
556	384.266	385.273	7.22153	2.08261e+06	1.99338e+06	1.94991e+06	1.98273e+06	1.98163e+06	1.94615e+06	1.84784e+06	1.88281e+06	2.46399e+06	2.06824e+06	2.95953e+06	2.38649e+06	1.8974e+06	2.54033e+06	1.86033e+06	1.56453e+06	1.89473e+06	1.45432e+06	2.14782e+06	2.00282e+06
557	384.266	385.273	7.35281	2.35098e+06	2.24586e+06	2.211e+06	2.25646e+06	2.26476e+06	2.21694e+06	2.11662e+06	2.11857e+06	2.70338e+06	2.3209e+06	3.26447e+06	2.67255e+06	2.13714e+06	2.85751e+06	2.15444e+06	1.80838e+06	2.16304e+06	1.66574e+06	2.44438e+06	2.32394e+06
558	384.338	385.346	11.6109	1.01342e+06	1.00972e+06	1.05854e+06	984017	950974	879843	850450	730071	186285	205703	213827	201750	199920	216901	217036	174701	166935	191324	226498	198988
559	385.282	386.289	5.71028	288808	279153	264390	273432	279431	268525	273519	274586	224189	246922	248703	210403	234213	259263	626815	154252	232502	347137	703133	378198
560	388.198	389.205	7.85929	390097	381177	373853	390706	390631	391180	331687	318226	178984	189777	140427	112873	117483	100252	253665	275212	601353	206218	101683	118245
561	388.26	389.268	15.3978	747931	724606	715270	733090	714195	677266	621116	580978	496147	648741	769017	790598	700496	648068	601970	499514	393950	740880	597204	791264
562	390.276	355.262	5.14715	1.09447e+06	1.06947e+06	1.10924e+06	1.07917e+06	1.07541e+06	1.08314e+06	1.07909e+06	1.038e+06	913230	8667.27	948398	2469.39	7684.06	1.20676e+06	3.3119e+06	298067	571557	112214	4.09735e+06	2.0835e+06
563	392.201	393.208	3.63997	439372	433847	435971	425980	431381	439588	431516	440291	440256	444359	410440	430017	441923	398272	423755	428687	423195	395145	433238	389211
564	392.217	393.224	4.83503	636357	620249	608872	635895	619909	624746	599759	629096	660140	723907	895379	638717	555173	1.86653e+06	1.12309e+06	901640	1.34145e+06	864533	567236	604740
565	393.287	394.294	6.40059	251049	239596	253491	244530	247481	247484	244564	247073	158894	201733	167658	187696	110648	313104	413023	138132	201639	189454	588373	325759
566	393.339	394.346	13.8596	7.12493e+06	6.9145e+06	6.84308e+06	6.71042e+06	6.79552e+06	6.80583e+06	6.53716e+06	6.0251e+06	5.66698e+06	5.94187e+06	5.91596e+06	6.16902e+06	5.94891e+06	6.04448e+06	5.94063e+06	5.30948e+06	5.55041e+06	5.82961e+06	5.96982e+06	6.35862e+06
567	395.303	396.31	6.66682	524408	494888	485293	501995	505350	494578	488359	476978	382622	450975	431432	429644	335880	468588	793506	209406	245715	405385	852370	709966
568	397.318	398.326	7.17292	2.83668e+06	2.7753e+06	2.73083e+06	2.77131e+06	2.79741e+06	2.72721e+06	2.65942e+06	2.67414e+06	1.25968e+06	1.88308e+06	1.71038e+06	1.87463e+06	1.58722e+06	1.44915e+06	5.32985e+06	1.92616e+06	2.20144e+06	3.13932e+06	4.43998e+06	5.09182e+06
569	795.506	398.76	17.1518	0	0	582.264	0	0	1402.01	6396.72	948263	1.04855e+06	1.07343e+06	936895	829978	842283	813841	828616	888545	857330	745939	948345	708965
570	398.169	399.177	4.45538	331107	322938	306034	270884	278068	321265	274984	233673	13723.6	2.89834e+06	40336.6	4666.5	0	0	41561.2	9452.62	67239.8	1.2987e+06	0	25301.2
571	398.317	399.324	9.9388	318013	315114	313479	332151	351401	346647	333327	344688	132652	51977	62291	30819.8	27994.2	69745.5	441650	997351	1.14711e+06	170678	339135	80169.3
572	399.333	400.34	7.72801	3.93778e+06	3.94948e+06	4.01751e+06	4.10586e+06	4.09682e+06	4.1318e+06	4.17265e+06	4.18158e+06	3.33038e+06	3.91402e+06	3.56671e+06	4.15436e+06	3.30632e+06	3.07044e+06	6.05817e+06	3.80143e+06	4.51686e+06	5.09026e+06	6.43288e+06	6.71517e+06
573	400.333	401.34	11.9499	1.12144e+07	1.08724e+07	1.06757e+07	1.04593e+07	1.00634e+07	9.19287e+06	9.10861e+06	7.62093e+06	22282.3	8842.46	18783.7	4036.9	3301.33	38291.6	10081.1	14090.3	8332.11	2415.74	39652.8	21423.7
574	401.277	402.284	4.692	65850.9	67678.5	67294.6	70403.9	69770.1	70102.9	70724.3	67976.5	96844.1	23360	64093.6	8005.85	10868.4	380871	187893	36451.3	43410.8	29279.7	339158	147467
575	405.32	406.328	10.9839	1.66833e+07	1.5566e+07	1.52377e+07	1.46643e+07	1.35789e+07	9.8902e+06	9.56344e+06	7.51316e+06	6.28087e+06	6.82709e+06	6.20874e+06	5.36612e+06	5.25464e+06	5.13195e+06	5.57761e+06	4.54069e+06	4.60305e+06	4.42639e+06	4.74782e+06	4.72475e+06
576	811.427	406.721	8.21561	511846	520078	504887	474137	530097	505078	483713	469489	589795	473138	535684	466684	478950	513764	487994	541712	517816	384565	498427	485527
577	408.154	409.162	5.85557	163847	159721	163290	158658	152492	151622	152308	145753	75429.3	48328.8	138283	147440	98370.7	64113.5	314307	222851	167683	70615.4	88429.9	113331
578	819.507	410.761	17.145	0	0	0	0	724.221	175822	631086	408288	327834	271987	201823	170724	178170	180520	132722	129977	92847.9	195491	86748	175143
579	409.848	410.855	0.836231	112921	112196	114086	118209	109638	111938	112415	114676	120416	120041	115308	121082	95521.6	122106	122869	101412	105122	97961	130363	111134
580	410.337	411.344	11.6532	480864	486406	454654	452215	417949	350011	356905	241140	139999	164465	128193	77331	68198.6	48168.7	133531	139484	102924	83118	293448	152803
581	411.277	412.284	4.90263	153147	154676	166242	156018	164674	164474	160073	147770	40400.6	0	69449.1	0	0	498798	362136	0	2340.72	0	2.3644e+06	735569
582	412.128	413.135	0.792302	73402.3	75589.9	78794.2	77456.1	73394.5	72610.2	75005.8	78541.8	72540.7	23600.8	32153.6	22352.5	16436.2	30688.9	43163.9	340609	284660	46998.1	114676	49384.1
583	412.258	413.266	12.233	1.29543e+06	1.19805e+06	1.15824e+06	1.12048e+06	1.03816e+06	937643	923262	570218	443967	386615	312616	248811	251987	248693	206728	187900	212654	183269	219435	228611
584	827.399	414.707	8.21468	800989	824280	867357	838117	822025	842877	831472	855843	1.09049e+06	910277	942445	879114	930466	1.04565e+06	921430	1.06641e+06	1.07267e+06	795027	979743	887357
585	414.203	437.192	6.46651	1.0567e+07	9.87243e+06	9.94936e+06	1.00385e+07	9.8927e+06	9.61112e+06	9.22235e+06	9.0556e+06	8.08789e+06	7.13829e+06	7.12203e+06	7.31441e+06	8.51948e+06	1.27018e+07	8.79975e+06	8.57984e+06	8.46703e+06	1.08225e+07	1.66088e+07	5.10866e+06
586	414.312	415.319	9.51488	234146	228785	233903	240710	232686	218067	198967	202492	88355.6	83821.6	65512.9	24601.9	36418.4	52867.3	165453	605799	618038	111055	332876	84087.9
587	832.486	417.25	4.22564	58171.2	50725.9	53810.4	53652.6	51511.4	59756	53504.6	56693.1	0	519108	624.024	0	0	0	0	0	20197.6	67247.9	4903.87	0
588	416.328	417.335	9.15262	138746	134798	134123	141667	132821	125466	106368	109200	23348	18922.4	13653.5	10316.1	5402.77	2761.9	52474.6	292602	392521	32985.7	71632.7	14777.5
589	417.185	418.192	1.68317	540659	542770	541250	545179	559397	527397	524234	560267	555199	631867	746623	819609	615199	457924	903128	261107	192421	491105	419689	621815
590	419.879	498.9	0.830136	532018	520382	518586	527070	510668	525383	528619	525598	514679	579990	479076	537455	500969	599155	498479	328724	348938	416740	518031	505533
591	420.309	421.317	6.1451	577669	593027	610825	590940	602545	603762	620324	655777	796785	495945	520624	466246	492221	835255	525334	689730	459397	508621	709423	794348
592	843.507	422.761	17.1458	0	0	0	0	5084.85	637474	657767	571790	520942	442076	347415	296814	289259	298357	294192	259698	272936	232424	245967	181005
593	423.334	424.341	7.38959	2.51166e+06	2.47588e+06	2.39286e+06	2.4014e+06	2.31897e+06	2.29598e+06	2.22336e+06	2.18066e+06	1.79403e+06	2.12608e+06	1.78421e+06	2.65497e+06	1.74687e+06	1.94883e+06	2.89007e+06	1.35061e+06	1.41941e+06	1.80532e+06	2.92521e+06	2.3829e+06
594	425.349	426.356	7.89909	8.81486e+06	8.71239e+06	8.68489e+06	8.80116e+06	8.70127e+06	8.62577e+06	8.28963e+06	8.1741e+06	5.11052e+06	7.47224e+06	6.12659e+06	8.95284e+06	5.34758e+06	6.16882e+06	1.16738e+07	5.2316e+06	6.02792e+06	7.55738e+06	1.1194e+07	1.10396e+07
595	426.144	427.151	0.791386	105041	106095	110664	105532	109291	103525	106660	103929	92901	34035.7	53615.7	52502.6	41522.6	41168.3	60430.7	566255	434130	68693.1	134079	59604.9
596	427.181	428.188	3.73946	193552	193239	194671	198505	192817	188847	184962	188286	267133	496351	253895	245151	382664	548488	122053	30213.7	17671.2	365141	131848	158487
597	427.293	428.3	5.03552	74038.1	71097.3	68605.4	67514.6	71786.6	70638	69921.5	67667.2	81298.4	21611.2	57630.4	15786.9	8418.01	267445	187491	27226.2	25686.1	18176.1	358181	192340
598	427.364	428.371	8.44547	1.47869e+06	1.45836e+06	1.41442e+06	1.39367e+06	1.35551e+06	1.30476e+06	1.25208e+06	1.27391e+06	1.32019e+06	1.66483e+06	1.67932e+06	1.75272e+06	1.18287e+06	1.78308e+06	1.15499e+06	707288	1.0265e+06	1.01132e+06	1.28818e+06	1.06571e+06
599	428.364	429.372	14.0351	1.21913e+06	1.21042e+06	1.14391e+06	1.16516e+06	1.16885e+06	1.10426e+06	991813	913955	263243	227878	57537.9	100947	134473	326982	176322	298424	422880	167298	855706	349579
600	428.364	429.371	15.8531	260365	248769	239005	245594	233678	211015	191013	167255	1.34435e+06	1.87489e+06	816837	1.70679e+06	1.77357e+06	1.76142e+06	1.62777e+06	1.53019e+06	1.70053e+06	1.58813e+06	1.11858e+06	1.31669e+06
601	429.287	430.294	4.39636	123572	128596	130090	125308	120802	120877	123854	125715	12381.6	0	28366.2	0	0	71833.7	419192	0	0	0	631604	322136
602	429.286	430.293	4.52637	104252	111036	112342	108366	103296	104474	107622	111876	10192.1	0	25448.4	0	0	62897.3	381030	0	0	0	587790	283024
603	429.287	430.295	4.90355	111719	115061	112199	109410	112661	115136	107315	109443	22819	0	48720.8	0	0	346211	266418	580.176	0	0	1.57641e+06	506267
604	429.308	430.316	5.2996	101900	96525.3	98452.7	95227.7	95772.5	96976.2	91897.9	98190.4	109609	28672.6	70072.2	24558.6	18520.1	461724	204079	97577.4	74033.6	32797.3	455376	186813
605	429.322	430.33	10.8074	423184	409765	413473	407597	389374	344587	329486	288132	47317.9	219497	146829	248491	127485	220504	385005	47457.3	45789.8	456925	160486	401072
606	429.372	430.379	15.8529	294204	257508	249115	237971	234312	214058	194856	178071	1.46024e+06	1.96298e+06	892272	1.62006e+06	1.64969e+06	1.66163e+06	1.54923e+06	1.468e+06	1.6028e+06	1.47365e+06	1.08859e+06	1.41372e+06
607	429.906	430.913	17.0101	2.64689e+06	2.32017e+06	2.23161e+06	2.22557e+06	2.21444e+06	1.82177e+06	1.45896e+06	1.21997e+06	1.30406e+06	1.26758e+06	1.0753e+06	1.00051e+06	982037	981939	964048	950421	990668	857123	930029	1.00425e+06
608	429.906	430.913	17.0866	1.61254e+06	1.43194e+06	1.38289e+06	1.39364e+06	1.3717e+06	1.14712e+06	927048	787631	835839	815129	668429	636174	619576	627282	614042	616009	632492	544654	600425	640536
609	430.269	431.276	5.14548	41260.3	43951.2	43088.4	45667.8	44977.6	40884.5	41520.3	38070.2	43250.5	0	49249.3	0	0	64548.4	214578	6782.69	21826.7	3378.87	436886	111034
610	430.268	431.275	5.552	82825.9	81892.1	84440.7	91690.5	84543.8	86456.3	81377.7	81876.3	111045	0	48680.6	0	0	125515	230960	24987.2	8942.32	2601.6	702305	172146
611	433.189	434.196	6.30356	44449.5	35330	42337.1	45073.2	47769.9	46259.7	41715.6	39797.5	210173	0	204949	0	0	691502	4058.54	12205.4	531	0	52299.7	4434.22
612	435.862	436.869	0.816189	113644	108281	118295	117338	118501	110206	121657	112894	112208	109540	152026	158148	118962	126529	146619	104044	87785.6	176525	152777	150596
613	437.288	438.296	8.21067	1.52539e+06	1.48448e+06	1.44809e+06	1.49294e+06	1.42619e+06	1.47389e+06	1.44161e+06	1.48721e+06	1.21689e+06	1.2559e+06	1.04857e+06	1.01417e+06	1.10251e+06	1.19092e+06	1.37731e+06	1.49835e+06	2.01763e+06	932579	1.19929e+06	1.22404e+06
614	441.345	442.352	7.10741	399590	395421	386428	400992	381940	388345	368834	356804	300091	378733	289261	418407	341669	217821	666794	281888	303619	460629	505056	490648
615	445.88	446.887	0.817271	183859	184788	172574	172247	186863	177536	178929	175177	104961	177605	155592	155113	210803	199622	186074	105897	120795	196119	155295	193497
616	447.171	448.178	0.843029	37519.6	35424	39838.3	42066.3	34814.8	41032.5	38961	36710.6	45194.7	25338.8	37063	29395.1	20805.8	21568.6	26089.5	107458	97000.5	28754.1	44381.6	25702.7
617	447.261	448.268	4.01839	2.32734e+06	2.31796e+06	2.26397e+06	2.29114e+06	2.2597e+06	2.21806e+06	2.22107e+06	2.22826e+06	76257.2	1.01049e+07	125231	0	546.288	3535.14	118212	17033.5	279401	3.3963e+06	756162	140199
618	447.334	448.341	7.35564	875693	850715	843809	856012	830755	837827	824798	801413	624180	653235	557666	954208	477613	1.1796e+06	1.01129e+06	617994	913718	668119	1.29922e+06	896131
619	895.547	448.781	5.14692	43172.3	39900.9	39783.3	39873	40017.1	39913.1	42303.4	37838.4	25421.4	0	29156.8	0	0	26102.6	220522	0	20168.8	0	248174	114303
620	448.17	449.178	4.05351	17896	20299	19307	18517.3	18512.2	17779.6	21054.7	17522.1	61981.6	1140.79	33033.7	0	2366.4	335970	22167.6	0	0	0	57988.2	18712.2
621	448.206	449.214	4.78909	1.80209e+06	1.78285e+06	1.81351e+06	1.79298e+06	1.86876e+06	1.85906e+06	1.81604e+06	1.85218e+06	588.768	0	0	0	0	634.8	0	0	0	0	0	0
622	449.258	450.265	4.17591	732298	733998	733176	721959	715832	720065	717295	733434	1.01835e+06	554.067	977063	0	0	1.8369e+06	1.31819e+06	1503.09	1371.29	0	1.57739e+06	992521
623	452.383	453.39	14.4637	1.28943e+06	1.2376e+06	1.23503e+06	1.23511e+06	1.22853e+06	1.19425e+06	1.10538e+06	1.02776e+06	1.06379e+06	1.05759e+06	935996	1.01129e+06	1.04766e+06	1.02694e+06	1.01731e+06	985509	1.02186e+06	947928	967768	1.06501e+06
624	453.284	454.291	7.87423	3.88738e+06	3.83766e+06	3.78268e+06	3.8536e+06	3.9497e+06	3.83635e+06	3.59613e+06	3.58738e+06	2.4823e+06	3.82526e+06	3.26837e+06	4.33033e+06	3.57174e+06	4.92672e+06	3.95673e+06	3.62787e+06	3.89299e+06	3.54311e+06	3.16656e+06	2.57839e+06
625	453.38	454.387	8.57205	296713	300096	307375	309821	321103	333327	330473	331196	261900	383074	371406	737861	313478	310074	454676	227715	256196	427374	887782	469098
626	455.324	456.331	5.66123	132307	126626	122513	128336	133912	133004	120096	122051	87834.6	44718.8	71207.2	36919.9	27209.2	195418	235080	185639	148935	60152.7	487092	219338
627	458.239	459.246	7.9741	5.10306e+06	5.07188e+06	5.08819e+06	5.10412e+06	5.07211e+06	5.01326e+06	4.6968e+06	4.63344e+06	2.93967e+06	4.85721e+06	3.66002e+06	4.61348e+06	4.23773e+06	3.51862e+06	4.15369e+06	3.65138e+06	3.94416e+06	4.99609e+06	3.28158e+06	3.83599e+06
628	458.238	459.245	8.18295	5.1714e+06	5.12679e+06	5.14671e+06	5.15949e+06	5.11954e+06	5.06194e+06	4.73544e+06	4.66721e+06	2.96426e+06	4.89886e+06	3.68383e+06	4.64526e+06	4.27253e+06	3.53701e+06	4.1815e+06	3.681e+06	3.96655e+06	5.03578e+06	3.30118e+06	3.84695e+06
629	459.243	460.25	4.40801	1.10516e+06	1.09517e+06	1.11405e+06	1.09023e+06	1.09991e+06	1.08174e+06	1.07562e+06	1.09111e+06	2.5449e+06	0	2.09356e+06	1425.79	0	5.71642e+06	2.24033e+06	643.086	538.728	553.608	3.5034e+06	2.17848e+06
630	461.257	462.265	4.53439	4.46727e+07	4.5162e+07	4.47947e+07	4.47797e+07	4.45018e+07	4.45984e+07	4.44756e+07	4.44058e+07	8.16341e+07	203901	7.19558e+07	163595	100874	1.74322e+08	6.48846e+07	420762	616927	108158	1.24694e+08	6.59878e+07
631	462.019	463.026	0.803698	141040	141372	136633	139622	135958	131191	140574	139365	128754	85884	98447.3	106053	87518.3	90543.1	108563	235323	225401	101402	151560	104905
632	463.251	464.258	4.16048	558686	555110	551278	572845	568626	567672	561585	555474	1.02817e+06	2952.92	1.00235e+06	5446.35	2430.84	2.95438e+06	996865	2045.75	9980.75	2832.67	1.95516e+06	827077
633	463.251	464.258	4.51349	731945	754331	734907	707607	731858	731822	722903	682580	1.48033e+06	516.936	1.27979e+06	505.92	509.952	3.65166e+06	866049	3252.98	3321.84	521.424	2.30846e+06	1.05873e+06
634	463.275	464.283	4.05169	41819.5	36927.1	45270.5	39971.4	38512.6	37140.9	38910.2	37413.8	148299	0	92153	0	0	188332	92822.5	0	672.894	0	317055	119080
635	463.275	464.282	4.32046	4.2566e+06	4.22029e+06	4.26639e+06	4.31164e+06	4.29772e+06	4.2406e+06	4.26215e+06	4.31038e+06	7.77692e+06	38724.2	7.04446e+06	7176.94	6745.14	1.19779e+07	8.89214e+06	73882.5	103650	38619.1	1.36863e+07	9.51068e+06
636	463.274	464.282	4.42056	4.48357e+06	4.45386e+06	4.49656e+06	4.53325e+06	4.524e+06	4.46116e+06	4.48586e+06	4.52062e+06	8.44937e+06	40032.6	7.3677e+06	7176.94	6745.14	1.33415e+07	9.41679e+06	75927.3	105831	40701.9	1.49516e+07	1.01311e+07
637	463.275	464.282	4.48345	4.35477e+06	4.33428e+06	4.37313e+06	4.41717e+06	4.41233e+06	4.35137e+06	4.37144e+06	4.41242e+06	7.99407e+06	40032.6	7.17004e+06	7176.94	6745.14	1.25277e+07	9.17971e+06	74792.5	105050	40152.3	1.42118e+07	9.80896e+06
638	463.272	464.279	4.51644	2.39963e+06	2.44555e+06	2.26532e+06	2.10019e+06	2.34016e+06	2.34012e+06	2.12979e+06	2.31621e+06	3.86979e+06	22661.8	3.49039e+06	5987.35	2389.64	5.50955e+06	4.87446e+06	50886.7	67503.3	23518.7	5.95668e+06	4.99481e+06
639	463.264	464.271	4.52983	117609	97026.1	71664.4	135784	96142.9	131395	113272	68630.5	321916	0	170446	0	0	1.46941e+06	17574.6	0	3742.44	0	1.04596e+06	168948
640	463.275	464.282	4.61088	3.96698e+06	3.98276e+06	4.00484e+06	3.98172e+06	3.99681e+06	3.93267e+06	3.92337e+06	3.98463e+06	7.44615e+06	37210.5	6.43098e+06	6574.99	5319.39	1.07732e+07	8.17776e+06	70894.6	97807.5	39230	1.22844e+07	8.62097e+06
641	463.274	464.281	4.99372	8.39256e+06	8.33376e+06	8.28432e+06	8.28912e+06	8.33627e+06	8.27773e+06	8.20282e+06	8.13094e+06	3.2466e+07	260921	2.20837e+07	173710	130593	7.08968e+07	1.13146e+07	163003	230934	66511	3.90943e+07	2.09071e+07
642	463.274	464.281	5.05065	6.02986e+06	6.01998e+06	6.10778e+06	6.15676e+06	6.18575e+06	6.23892e+06	6.18504e+06	6.25258e+06	2.57691e+07	220953	1.78614e+07	153706	113644	5.91668e+07	7.94457e+06	110933	173702	36061.6	2.90202e+07	1.58652e+07
643	463.304	464.311	8.46429	892163	897657	884481	851401	855640	865856	827378	826206	637192	629094	691958	602243	620589	560256	875418	1.00827e+06	1.3504e+06	636134	565340	647849
644	464.278	465.286	4.33529	1.43232e+06	1.40579e+06	1.41723e+06	1.4378e+06	1.44277e+06	1.41578e+06	1.43653e+06	1.44589e+06	2.727e+06	33461.8	2.36833e+06	52683.1	32212.1	4.35926e+06	2.86957e+06	29013.4	45814	45548.4	4.62591e+06	3.09148e+06
645	464.278	465.286	4.46427	1.76541e+06	1.73279e+06	1.75468e+06	1.78802e+06	1.7926e+06	1.76701e+06	1.77937e+06	1.8127e+06	3.44634e+06	38999.3	3.26571e+06	53451.8	32212.1	7.46377e+06	3.52535e+06	32074.4	49178.7	46117.2	6.58493e+06	4.01449e+06
646	464.277	465.284	4.99249	734162	728436	723836	734457	726344	717709	713514	730778	2.28826e+06	6771.17	2.25958e+06	1807.3	0	7.56677e+06	1.22772e+06	0	4333.46	0	3.27265e+06	1.88864e+06
647	465.254	466.261	3.94581	155411	145404	150065	150983	153023	150541	143775	152417	16520	0	27718.4	0	0	163611	699754	0	0	0	400332	120578
648	465.266	466.274	5.20121	227762	217040	205736	210459	218405	213084	215913	219128	960874	1641.82	662082	0	0	2.08655e+06	262126	0	0	526.056	1.08856e+06	576177
649	465.28	466.287	5.19861	226113	222449	235700	232089	223265	223961	203716	220074	855159	3080.59	666947	2351.79	0	2.08095e+06	238533	0	1757.54	0	1.04486e+06	403389
650	465.308	488.298	4.90372	72853.7	74502.6	78033.7	76966.8	71241.7	77190.3	80111.2	76676.5	15850.4	0	30273.6	0	0	227088	174270	0	0	0	1.08649e+06	349355
651	465.321	466.328	9.41508	4.37962e+06	4.22576e+06	3.96557e+06	3.69361e+06	3.51784e+06	3.21237e+06	2.90042e+06	2.86254e+06	2.08801e+06	2.4388e+06	1.57171e+06	1.87726e+06	1.93793e+06	2.62297e+06	2.46633e+06	1.69258e+06	2.00992e+06	1.4952e+06	2.26315e+06	1.81192e+06
652	466.093	467.101	14.1052	328862	325574	328930	300243	310607	333010	270896	242690	1980.96	555.36	2158.37	1917.38	1450.49	1939.9	1031.62	1980.16	592.296	1415.45	691280	494.328
653	467.301	468.308	6.99955	2.90942e+06	2.86472e+06	2.8356e+06	2.9272e+06	2.91559e+06	2.88326e+06	2.7832e+06	2.76476e+06	1.33169e+06	2.80693e+06	1.71432e+06	2.49063e+06	2.22807e+06	1.31547e+06	3.70285e+06	2.19436e+06	1.99026e+06	4.39277e+06	2.8246e+06	3.68032e+06
654	467.336	468.343	9.50726	2.09576e+06	2.06612e+06	2.03921e+06	2.04048e+06	2.03287e+06	1.85652e+06	1.70824e+06	1.73206e+06	735739	1.80487e+06	604038	1.06195e+06	1.08971e+06	1.03391e+06	1.0691e+06	1.05453e+06	1.02131e+06	693182	1.57083e+06	979515
655	946.558	474.286	3.95227	408553	406723	397708	382984	407928	410807	381860	376792	530305	444078	653970	716947	439864	576862	369768	319245	302198	489204	420021	559644
656	474.117	475.125	3.73446	102141	100978	101939	108774	102809	103076	102813	99360.3	410868	75896	372950	20961.3	34576.3	548134	300615	112258	39075.4	50141.4	353696	194077
657	477.284	478.291	7.43571	4.37385e+06	4.16159e+06	4.06257e+06	4.07579e+06	4.0353e+06	3.88422e+06	3.73241e+06	3.75294e+06	5.53332e+06	5.05867e+06	5.99804e+06	4.50874e+06	5.10522e+06	2.97648e+06	2.8123e+06	3.26457e+06	2.73296e+06	3.64626e+06	4.14979e+06	3.92209e+06
658	477.319	478.326	8.23029	7.2488e+06	7.26888e+06	7.21951e+06	7.36258e+06	7.32023e+06	7.12496e+06	8.07179e+06	8.28263e+06	6.37583e+06	9.71137e+06	7.08071e+06	9.45208e+06	8.61679e+06	6.55446e+06	7.79407e+06	7.35261e+06	7.4839e+06	9.96602e+06	6.48608e+06	7.46717e+06
659	477.32	478.328	17.1484	8125.93	25034.5	26392.4	24507.8	33132.7	451397	734124	1.03283e+06	1.02498e+06	949602	910483	835363	849700	838921	814273	822968	802037	742153	760104	723309
660	478.257	479.265	4.25872	558209	552064	554409	545913	559789	559799	562259	555296	1.23925e+06	0	1.02143e+06	1317.19	0	2.81972e+06	1.22275e+06	0	571.92	542.304	1.71592e+06	1.02074e+06
661	479.268	480.275	4.18585	4.04351e+07	4.03653e+07	4.05038e+07	4.07261e+07	4.04339e+07	4.00684e+07	4.02255e+07	4.06637e+07	6.04232e+07	158422	5.90304e+07	141332	100794	1.13332e+08	6.85579e+07	417488	636423	165989	9.15424e+07	5.63701e+07
662	479.3	480.307	8.134	1.48297e+06	1.44861e+06	1.42043e+06	1.4045e+06	1.35873e+06	1.3495e+06	1.25187e+06	1.23414e+06	1.33888e+06	1.30678e+06	1.36955e+06	1.13643e+06	1.06483e+06	1.17383e+06	1.16e+06	1.46081e+06	1.3074e+06	915284	1.41918e+06	1.41817e+06
663	479.336	480.343	8.68309	2.38647e+06	2.4002e+06	2.41529e+06	2.40754e+06	2.41308e+06	2.35742e+06	2.10013e+06	2.10875e+06	667345	2.47886e+06	869119	1.89324e+06	1.78439e+06	817085	1.03053e+06	2.10043e+06	2.0917e+06	1.79085e+06	969438	1.03515e+06
664	480.272	481.279	4.09592	1.00894e+07	1.00338e+07	1.00756e+07	1.00548e+07	9.96059e+06	9.91412e+06	9.94163e+06	9.98877e+06	1.4441e+07	39759.4	1.44359e+07	26422.1	20266.3	2.8249e+07	1.77153e+07	102421	146725	39249.9	2.23907e+07	1.38871e+07
665	481.264	482.271	4.18271	1.0646e+06	1.07788e+06	1.09489e+06	1.09668e+06	1.08004e+06	1.08454e+06	1.06002e+06	1.10361e+06	1.63221e+06	1684.92	1.59179e+06	7264.22	3447	3.03702e+06	1.88845e+06	5570.17	11306.9	4463.93	2.43095e+06	1.54677e+06
666	481.261	482.268	4.47743	815501	813522	825657	825432	813504	803093	802276	821892	1.23402e+06	821.208	1.18087e+06	0	625.752	2.21753e+06	1.18715e+06	1041.63	6150.26	2725.44	1.76532e+06	1.07937e+06
667	481.285	482.293	4.3111	270044	269245	259308	267731	267812	257594	258708	273580	547247	0	449743	0	0	735502	597954	0	2975.56	0	960205	639654
668	481.285	482.293	4.44645	279713	279136	268060	276820	276091	265089	265426	285820	544897	0	445050	0	0	722036	630972	575.154	2975.56	0	949120	667637
669	481.286	482.293	4.5993	239063	241513	241580	234690	238986	220305	231608	243030	354501	0	228184	0	0	562162	599488	2942.8	4066.31	1422.17	876380	602527
670	481.315	482.322	7.5746	1.93895e+06	1.94476e+06	1.97759e+06	2.00433e+06	2.02878e+06	1.99187e+06	1.96334e+06	1.99442e+06	1.07033e+06	2.94349e+06	1.55699e+06	2.36058e+06	2.25739e+06	1.10752e+06	1.43275e+06	2.71141e+06	1.85642e+06	2.02363e+06	1.55888e+06	1.61302e+06
671	481.316	482.323	8.78959	2.09691e+06	2.08766e+06	1.93988e+06	1.77819e+06	1.55479e+06	1.12406e+06	868193	782983	540258	876444	752921	1.05381e+06	861342	923733	640979	611083	741884	647257	531851	431654
672	481.315	482.322	9.02044	8.73646e+06	8.55379e+06	8.4498e+06	8.54653e+06	8.62856e+06	8.1278e+06	7.01829e+06	6.95643e+06	5.09883e+06	8.63537e+06	7.10895e+06	1.0243e+07	8.22654e+06	8.2948e+06	5.75627e+06	5.45525e+06	6.89645e+06	5.99377e+06	4.73974e+06	3.856e+06
673	481.352	482.359	8.80808	1.31459e+07	1.32548e+07	1.3146e+07	1.30491e+07	1.31534e+07	1.26625e+07	1.14456e+07	1.13687e+07	4.34395e+06	1.50856e+07	5.2715e+06	1.17205e+07	1.02534e+07	4.28036e+06	5.17967e+06	8.51089e+06	9.25802e+06	1.08138e+07	4.76908e+06	5.4379e+06
674	481.352	482.359	8.97409	1.35151e+07	1.35743e+07	1.34195e+07	1.32777e+07	1.33502e+07	1.28226e+07	1.15857e+07	1.14987e+07	4.39453e+06	1.52527e+07	5.32985e+06	1.18438e+07	1.03575e+07	4.3248e+06	5.23342e+06	8.60645e+06	9.35778e+06	1.09236e+07	4.81841e+06	5.4972e+06
675	482.238	483.246	7.67033	1.79446e+06	1.7564e+06	1.73376e+06	1.74262e+06	1.7011e+06	1.66522e+06	1.59318e+06	1.5883e+06	1.76364e+06	1.3429e+06	1.97189e+06	1.3494e+06	1.38623e+06	1.76456e+06	1.70199e+06	1.08117e+06	990602	1.55843e+06	1.75861e+06	1.89307e+06
676	484.104	485.111	9.48247	1.05375e+06	996466	954665	925484	929990	894789	750375	743451	159985	119934	138305	92984.9	107263	205328	142243	147095	137072	113269	240953	164930
677	484.254	485.262	8.47731	1.43974e+06	1.45798e+06	1.38999e+06	1.41496e+06	1.3982e+06	1.35335e+06	1.23274e+06	1.21662e+06	951490	982436	1.10574e+06	1.02038e+06	844775	1.07439e+06	1.35587e+06	938137	880601	1.38155e+06	1.35278e+06	1.64297e+06
678	486.27	487.277	9.71783	7.19126e+06	7.1919e+06	7.20327e+06	7.11324e+06	7.0558e+06	6.05528e+06	5.59649e+06	5.24181e+06	3.427e+06	5.11381e+06	4.4481e+06	5.89593e+06	5.13945e+06	6.15038e+06	4.32874e+06	2.84986e+06	3.16517e+06	5.74962e+06	3.2729e+06	3.63078e+06
679	486.27	487.277	9.91537	7.77049e+06	7.63606e+06	7.51091e+06	7.32906e+06	7.14095e+06	6.20251e+06	5.76705e+06	5.43409e+06	3.46647e+06	5.52325e+06	4.7033e+06	6.33422e+06	5.55469e+06	6.59025e+06	4.62594e+06	2.85434e+06	3.1555e+06	6.2122e+06	3.35283e+06	3.81443e+06
680	486.27	487.277	10.1026	3.01932e+06	2.8447e+06	2.70401e+06	2.52652e+06	2.37342e+06	1.86818e+06	1.62775e+06	1.42847e+06	842762	1.54201e+06	1.31493e+06	1.87805e+06	1.61564e+06	2.28324e+06	1.16895e+06	556017	620428	1.73031e+06	711912	898918
681	493.316	494.323	7.31365	1.27238e+07	1.27023e+07	1.27269e+07	1.30939e+07	1.30596e+07	1.31406e+07	1.25027e+07	1.25149e+07	5.05702e+06	1.13816e+07	6.93076e+06	9.56561e+06	8.30508e+06	4.75574e+06	1.81862e+07	1.35851e+07	1.1339e+07	2.10049e+07	1.4925e+07	2.21952e+07
682	493.351	494.358	11.0189	1.70577e+06	1.68556e+06	1.64377e+06	1.65661e+06	1.63558e+06	1.38073e+06	1.33939e+06	1.13396e+06	627473	1.03934e+06	484158	700176	711693	941258	1.05199e+06	408387	425791	584732	705299	495359
683	495.264	496.271	4.34249	5.00841e+06	4.97141e+06	4.99234e+06	4.98427e+06	4.97425e+06	4.96812e+06	4.91014e+06	4.93955e+06	1.32411e+07	5862.76	1.07681e+07	1400.9	0	2.76849e+07	1.00967e+07	26631.4	35861.1	1384.27	1.51898e+07	1.08333e+07
684	495.329	496.337	7.97434	4.45365e+08	4.47616e+08	4.51826e+08	4.59312e+08	4.6137e+08	4.5577e+08	4.5242e+08	4.53909e+08	2.5794e+08	5.05697e+08	3.49163e+08	4.96471e+08	4.36156e+08	3.17426e+08	4.15787e+08	3.50954e+08	3.68286e+08	5.63613e+08	3.30398e+08	3.97261e+08
685	495.33	496.337	8.18459	5.63788e+08	5.61152e+08	5.57935e+08	5.6241e+08	5.59969e+08	5.51707e+08	5.42067e+08	5.4001e+08	3.08163e+08	6.06505e+08	4.13853e+08	5.91215e+08	5.19566e+08	3.72489e+08	4.88258e+08	4.10089e+08	4.34267e+08	6.72005e+08	3.8719e+08	4.68216e+08
686	495.33	496.337	8.37151	5.60353e+08	5.51515e+08	5.44951e+08	5.47881e+08	5.41446e+08	5.33625e+08	5.23014e+08	5.20857e+08	3.0029e+08	5.87458e+08	4.01183e+08	5.72935e+08	5.03741e+08	3.60473e+08	4.70551e+08	3.99093e+08	4.19986e+08	6.49544e+08	3.76266e+08	4.53355e+08
687	991.379	496.697	3.67521	218959	212954	222657	221485	209398	219189	220158	217183	356619	223496	468373	278823	171688	234447	340983	150458	166299	304579	320240	328813
688	496.125	519.114	3.73248	194290	181003	192694	196475	182283	189835	192830	186779	738039	136458	676820	37785.8	57539.2	992654	551526	205784	71411.4	95865.8	633142	354646
689	496.333	497.34	8.2866	1.58906e+08	1.58008e+08	1.56766e+08	1.57997e+08	1.57153e+08	1.54516e+08	1.51139e+08	1.50669e+08	8.53132e+07	1.69573e+08	1.14923e+08	1.64719e+08	1.4482e+08	1.03042e+08	1.35214e+08	1.13673e+08	1.20521e+08	1.86495e+08	1.07554e+08	1.30052e+08
690	496.41	497.417	14.1545	1.19435e+06	1.16919e+06	1.18424e+06	1.14661e+06	1.12114e+06	1.11737e+06	1.04442e+06	1.00464e+06	989121	1.00102e+06	931407	936492	987741	964176	968029	949529	974107	932408	941801	974708
691	497.278	498.285	4.17977	8.9992e+06	8.97928e+06	9.01906e+06	8.93992e+06	8.87736e+06	8.83755e+06	8.83392e+06	8.91934e+06	1.13411e+07	34403.8	1.13098e+07	28852.2	17729.1	2.23278e+07	1.56787e+07	97790.2	153282	39113.3	1.88147e+07	1.1716e+07
692	497.269	498.276	4.33547	67125.8	54589.7	58972.1	63897.5	74136.2	66906.4	65725.8	67899.7	264012	0	182277	0	0	504855	111437	0	0	0	201637	197176
693	497.893	498.9	17.087	1.35965e+06	1.21464e+06	1.17095e+06	1.1549e+06	1.1378e+06	936133	737197	617079	672227	635480	538933	477485	492319	479428	472829	457410	497014	416604	459754	508070
694	498.338	499.345	8.23067	3.38839e+06	3.36514e+06	3.35723e+06	3.39352e+06	3.35453e+06	3.30418e+06	3.2427e+06	3.21618e+06	1.8266e+06	3.64863e+06	2.49496e+06	3.537e+06	3.05413e+06	2.25269e+06	2.94079e+06	2.48502e+06	2.63057e+06	4.05546e+06	2.29723e+06	2.793e+06
695	499.269	500.277	5.93683	206383	205057	201561	211137	197936	209279	198834	195128	611541	60849.9	399197	69250.7	26310.5	33237	240410	553690	581961	54599.3	261294	325238
696	499.295	464.281	5.21262	7.09131e+06	7.04346e+06	6.94697e+06	6.9437e+06	6.97033e+06	6.93346e+06	6.84652e+06	6.77845e+06	3.00476e+07	254419	1.98261e+07	165409	127602	6.24105e+07	8.19236e+06	116363	184413	31464.6	3.20158e+07	1.71031e+07
697	501.284	502.291	7.41947	8.97811e+06	8.5669e+06	8.31785e+06	8.59067e+06	8.47261e+06	8.32703e+06	7.92845e+06	7.86262e+06	1.15091e+07	7.08643e+06	1.32943e+07	9.3978e+06	6.90674e+06	8.82484e+06	8.08988e+06	8.70299e+06	8.27774e+06	6.25009e+06	1.00485e+07	1.07246e+07
698	502.099	503.106	15.7944	851233	785708	817666	775928	789146	755310	636909	566040	108582	82856.3	93100.9	79626.9	91821	85289.1	89174.6	78112.1	79358.5	68171.5	1.24753e+06	67284.6
699	503.267	504.274	5.20771	363235	369826	373303	368641	345833	362743	350094	336779	1.10166e+06	5953.9	849468	1611.5	1419.31	1.83014e+06	426120	1376.16	5267.73	586.386	1.24438e+06	751631
700	503.3	504.307	7.81948	447960	437224	424044	432138	438139	432530	404573	407918	512619	502387	610663	509343	494778	350302	295266	450283	406846	374985	492500	530718
701	503.85	504.857	0.815923	101891	98193.1	103296	97877.9	101982	97356.9	100928	95942.8	98704.7	92228.8	131894	137752	102198	110049	120644	86444.4	77131.8	148300	124842	129689
702	504.197	505.204	4.70352	77414.4	73300.1	73058.5	79046.6	71714.6	71257	81289.7	73894.3	246666	2239.35	189858	0	0	714316	77133.9	4075.57	5504.17	0	182877	78675.7
703	505.351	506.358	9.58792	4.86179e+06	5.05117e+06	5.02287e+06	5.1417e+06	5.13904e+06	4.92005e+06	4.71968e+06	4.76851e+06	3.72636e+06	5.76463e+06	5.39012e+06	7.52666e+06	6.56505e+06	5.36781e+06	5.06535e+06	4.09767e+06	4.60746e+06	6.99796e+06	4.45769e+06	4.70096e+06
704	505.351	506.358	9.61707	1.03498e+06	1.1039e+06	1.18166e+06	1.25515e+06	1.32837e+06	1.30616e+06	1.29897e+06	1.25117e+06	896979	1.42223e+06	1.35413e+06	1.98723e+06	1.54772e+06	1.20245e+06	1.10558e+06	804784	920482	1.45156e+06	898253	928140
705	505.351	506.358	9.71827	3.5709e+06	3.70655e+06	3.71948e+06	3.83807e+06	3.9097e+06	3.80263e+06	3.71765e+06	3.8e+06	2.88534e+06	4.46312e+06	4.07356e+06	5.93791e+06	4.90032e+06	3.8343e+06	3.53134e+06	2.60288e+06	2.95416e+06	5.29789e+06	2.84065e+06	3.11601e+06
706	505.35	506.358	9.74902	3.63777e+06	3.75994e+06	3.73768e+06	3.83067e+06	3.8855e+06	3.78037e+06	3.68557e+06	3.76058e+06	2.85931e+06	4.43412e+06	4.03812e+06	5.88587e+06	4.85997e+06	3.7878e+06	3.49783e+06	2.56874e+06	2.91801e+06	5.28794e+06	2.80611e+06	3.08843e+06
707	505.351	506.358	9.79086	4.02411e+06	4.15701e+06	4.10199e+06	4.20664e+06	4.2327e+06	4.12246e+06	4.01615e+06	4.08264e+06	3.09579e+06	4.82753e+06	4.36952e+06	6.33171e+06	5.27773e+06	4.12386e+06	3.82117e+06	2.80065e+06	3.17663e+06	5.65163e+06	3.07094e+06	3.3494e+06
708	505.35	506.357	9.81665	3.58192e+06	3.70123e+06	3.6111e+06	3.70846e+06	3.70652e+06	3.62116e+06	3.53647e+06	3.5983e+06	2.70879e+06	4.2428e+06	3.84417e+06	5.59247e+06	4.63799e+06	3.61737e+06	3.32962e+06	2.4343e+06	2.75978e+06	5.04814e+06	2.66832e+06	2.93769e+06
709	505.35	506.358	9.8834	3.68077e+06	3.76684e+06	3.67659e+06	3.75374e+06	3.76552e+06	3.68234e+06	3.59511e+06	3.64398e+06	2.73578e+06	4.31309e+06	3.8734e+06	5.67487e+06	4.70093e+06	3.71303e+06	3.35931e+06	2.4265e+06	2.73933e+06	5.07721e+06	2.65653e+06	2.94349e+06
710	506.239	507.246	7.60417	491349	469567	469625	479602	460604	468984	459934	446380	558780	200746	579272	258034	194164	789161	646609	310075	349190	259556	635574	716345
711	506.263	507.27	9.22185	590916	590598	582187	605345	598748	390442	188901	170203	703924	2153.62	454338	583913	311396	5709.18	4901.01	4757.41	400585	13522.9	5353.88	382755
712	507.331	508.338	7.88093	1.07515e+06	1.07607e+06	1.06876e+06	1.11777e+06	1.12303e+06	1.12122e+06	1.05454e+06	1.04919e+06	701077	1.22738e+06	1.01242e+06	1.09147e+06	970709	700135	1.12628e+06	1.201e+06	771845	1.27484e+06	1.2073e+06	1.41353e+06
713	507.367	508.374	9.11392	9.374e+06	9.55391e+06	9.70827e+06	9.80551e+06	9.84254e+06	9.16795e+06	8.40879e+06	8.28523e+06	3.28359e+06	1.03861e+07	4.20347e+06	1.0157e+07	7.93645e+06	2.53197e+06	4.26707e+06	7.69534e+06	8.16882e+06	9.13596e+06	2.88031e+06	3.94753e+06
714	507.367	508.374	9.18165	8.04743e+06	8.43748e+06	8.81608e+06	9.03672e+06	9.21911e+06	8.64431e+06	7.93565e+06	7.82971e+06	3.14485e+06	9.82504e+06	4.03627e+06	9.71942e+06	7.5515e+06	2.4555e+06	4.09189e+06	7.24896e+06	7.71009e+06	8.67455e+06	2.76564e+06	3.781e+06
715	507.368	508.375	9.30527	8.86015e+06	9.13175e+06	9.34983e+06	9.4897e+06	9.58495e+06	8.9373e+06	8.2057e+06	8.07131e+06	3.24744e+06	1.01298e+07	4.15918e+06	9.98271e+06	7.78972e+06	2.51232e+06	4.20207e+06	7.48214e+06	7.95791e+06	8.92826e+06	2.84608e+06	3.88987e+06
716	508.23	509.237	4.40304	61111.9	61831.4	62966.7	63101.5	62955.9	61876.4	62267	63854.1	7333.54	0	1608.95	0	0	19867.8	173680	65072.2	48847	0	286748	23901.7
717	509.346	510.353	8.69596	1.88052e+07	1.88764e+07	1.87839e+07	1.87082e+07	1.86163e+07	1.79227e+07	1.59946e+07	1.5797e+07	8.79944e+06	2.0932e+07	1.40005e+07	2.12815e+07	1.76124e+07	9.92767e+06	1.01941e+07	1.19683e+07	9.4289e+06	1.45052e+07	9.30339e+06	1.05145e+07
718	509.346	532.336	8.89538	3.82939e+06	3.97039e+06	3.97453e+06	3.94123e+06	3.99173e+06	3.90167e+06	3.30274e+06	3.20183e+06	1.70529e+06	3.93732e+06	2.71153e+06	3.91998e+06	3.23415e+06	1.89059e+06	1.98808e+06	2.20702e+06	1.74071e+06	2.69201e+06	1.72263e+06	2.00232e+06
719	510.35	511.357	9.11452	5.41579e+06	5.37472e+06	5.28245e+06	5.31327e+06	5.23271e+06	5.02593e+06	4.46711e+06	4.41288e+06	2.46401e+06	5.8335e+06	3.89116e+06	5.96716e+06	4.92738e+06	2.75408e+06	2.84337e+06	3.3263e+06	2.62738e+06	4.06002e+06	2.57448e+06	2.90893e+06
720	511.326	512.333	7.14901	400201	372860	375751	390297	375330	375881	348295	333628	607302	246783	533948	251756	211155	605524	691904	487894	465268	270901	530522	301088
721	512.228	513.235	0.785598	27487.5	27422.2	27124.7	27096.2	25855.8	27445.4	30088.2	23002.4	16914.6	5240.99	6316.66	5593.73	4132.5	5898.91	10639.3	249466	168619	13390.9	49832.1	13927
722	513.275	496.272	4.26379	5.06309e+06	5.03753e+06	5.06145e+06	5.04611e+06	5.0294e+06	5.03157e+06	4.97208e+06	5.0076e+06	1.33112e+07	5862.76	1.08424e+07	1400.9	0	2.78407e+07	1.03098e+07	26631.4	35861.1	1384.27	1.53467e+07	1.09033e+07
723	513.275	536.264	4.34119	1.25274e+06	1.20053e+06	1.222e+06	1.21098e+06	1.21068e+06	1.21616e+06	1.18952e+06	1.20163e+06	2.37935e+06	0	2.17523e+06	546.288	0	3.50134e+06	2.02544e+06	2083.13	10031.2	0	2.68239e+06	2.11709e+06
724	1028.61	515.31	8.18209	2.6802e+06	2.68021e+06	2.63064e+06	2.60532e+06	2.53693e+06	2.53279e+06	2.31054e+06	2.26178e+06	1.45469e+06	2.5465e+06	1.74195e+06	2.32841e+06	2.23177e+06	1.62145e+06	1.94477e+06	1.80645e+06	1.89435e+06	2.47672e+06	1.56038e+06	1.8518e+06
725	1029.61	515.812	8.18852	1.45148e+06	1.43753e+06	1.42407e+06	1.36383e+06	1.34446e+06	1.3423e+06	1.22484e+06	1.19103e+06	741680	1.33596e+06	969378	1.24188e+06	1.24245e+06	884348	1.07767e+06	943539	992356	1.33326e+06	813775	955660
726	515.23	516.237	5.00509	70860.2	70686.4	72999.9	75480.2	63631.4	73999.3	68513.9	67406.4	477056	0	430695	597.576	0	682056	106030	0	0	0	246322	136136
727	515.289	462.265	4.11686	4.48899e+07	4.53717e+07	4.50141e+07	4.4988e+07	4.4703e+07	4.4819e+07	4.46782e+07	4.45986e+07	8.23653e+07	211285	7.23505e+07	169079	101233	1.77722e+08	6.55998e+07	423641	620281	109523	1.2581e+08	6.64695e+07
728	515.291	462.266	4.50958	2.78678e+07	2.83393e+07	2.79981e+07	2.80084e+07	2.78419e+07	2.79455e+07	2.7896e+07	2.77343e+07	5.58631e+07	99564.1	4.76782e+07	98815.1	54180	1.29762e+08	3.56558e+07	253866	352824	19495.8	8.78637e+07	4.27849e+07
729	515.297	516.305	7.33516	2.91163e+06	2.85444e+06	2.88399e+06	2.98173e+06	2.9398e+06	2.91149e+06	2.72848e+06	2.78474e+06	1.03154e+06	2.55199e+06	1.42317e+06	2.03412e+06	1.7881e+06	1.01874e+06	3.91772e+06	2.85792e+06	2.42441e+06	4.59564e+06	3.14957e+06	4.73732e+06
730	517.315	518.323	7.04402	4.36568e+06	4.66531e+06	4.63447e+06	4.74557e+06	4.6796e+06	4.60478e+06	4.31994e+06	4.36603e+06	6.02613e+06	3.26676e+06	7.00391e+06	3.72986e+06	2.97454e+06	8.9877e+06	6.34937e+06	2.49211e+06	1.84671e+06	4.08962e+06	7.77964e+06	1.09814e+07
731	517.315	518.323	7.13706	4.23627e+06	4.40079e+06	4.36526e+06	4.47027e+06	4.40895e+06	4.34242e+06	4.0638e+06	4.11488e+06	5.77929e+06	3.08461e+06	6.72064e+06	3.54378e+06	2.73576e+06	8.70181e+06	6.01678e+06	2.26719e+06	1.67153e+06	3.7847e+06	7.31629e+06	1.05633e+07
732	517.312	518.319	7.94149	3.91379e+07	4.0709e+07	4.12652e+07	4.19537e+07	4.24782e+07	4.25988e+07	4.07259e+07	4.02693e+07	2.37649e+07	4.07535e+07	3.07999e+07	3.91757e+07	3.52194e+07	2.98157e+07	3.65817e+07	3.23153e+07	3.42333e+07	4.28439e+07	2.75546e+07	3.2379e+07
733	517.312	518.319	8.17101	7.81255e+07	7.84e+07	7.75625e+07	7.78883e+07	7.72866e+07	7.65082e+07	7.19597e+07	7.08342e+07	4.42377e+07	7.38616e+07	5.52571e+07	7.038e+07	6.45282e+07	5.18644e+07	6.28316e+07	5.52187e+07	5.93938e+07	7.63468e+07	4.95058e+07	5.78053e+07
734	517.311	518.318	8.2703	6.71704e+07	6.5596e+07	6.42984e+07	6.4788e+07	6.44228e+07	6.34982e+07	6.03869e+07	5.97087e+07	3.86994e+07	6.40061e+07	4.76369e+07	6.17776e+07	5.59952e+07	4.48552e+07	5.40917e+07	4.73546e+07	5.04997e+07	6.55981e+07	4.366e+07	5.09289e+07
735	519.262	520.269	5.15418	79756.6	83477.3	87338.9	85442.1	80867.5	82651	78517.6	84982.2	332737	0	216193	499.2	500.352	638660	71510.2	0	0	0	287696	150432
736	519.298	520.306	4.73291	167739	163519	170309	174688	161208	162377	169487	165530	86533.9	0	111201	0	0	370542	546630	68931.2	79232.3	14558.9	1.25669e+06	405628
737	519.317	520.324	7.97663	446442	606505	731219	770053	880144	933804	891806	874359	306219	1.05816e+06	406193	974017	791836	360740	647391	866359	1.0058e+06	1.01651e+06	373298	408008
738	519.329	520.337	7.48379	2.06922e+08	2.07145e+08	2.07875e+08	2.09884e+08	2.08553e+08	2.04321e+08	2.03211e+08	2.01788e+08	2.48298e+08	1.62615e+08	2.92756e+08	1.65909e+08	1.71538e+08	2.78402e+08	2.48798e+08	1.24853e+08	1.10668e+08	2.15665e+08	2.80471e+08	3.08917e+08
739	519.329	520.336	7.65393	2.14039e+08	2.13256e+08	2.13428e+08	2.15258e+08	2.13602e+08	2.08845e+08	2.07339e+08	2.05884e+08	2.53367e+08	1.65497e+08	2.98445e+08	1.68614e+08	1.74414e+08	2.83857e+08	2.53797e+08	1.2688e+08	1.12346e+08	2.1932e+08	2.85662e+08	3.1496e+08
740	519.329	520.337	7.80801	2.05525e+08	2.0224e+08	2.0091e+08	2.00702e+08	1.99037e+08	1.92749e+08	1.92088e+08	1.90364e+08	2.3476e+08	1.51572e+08	2.77878e+08	1.5464e+08	1.59628e+08	2.64226e+08	2.35035e+08	1.14899e+08	1.02165e+08	2.01994e+08	2.65324e+08	2.92886e+08
741	520.352	521.359	13.2143	775248	777897	771451	749519	729635	740345	711294	592956	0	0	0	0	0	529.656	0	570.744	0	0	0	525.528
742	521.277	522.285	4.30856	277924	273521	268196	270179	279104	276155	278139	265454	536347	542.484	500135	0	611.376	605499	530241	1484.69	2902.15	0	907770	591461
743	521.347	544.337	8.26572	9.5475e+07	9.43142e+07	9.24159e+07	9.26866e+07	9.19699e+07	9.13269e+07	8.71677e+07	8.6904e+07	1.09345e+08	4.36178e+07	1.19623e+08	5.34868e+07	4.06976e+07	1.70744e+08	1.37214e+08	5.63437e+07	5.77125e+07	6.19875e+07	1.44977e+08	1.69397e+08
744	521.345	522.352	8.47937	1.44224e+08	1.45731e+08	1.43804e+08	1.44546e+08	1.42806e+08	1.43444e+08	1.37126e+08	1.3673e+08	1.07083e+08	1.16845e+08	1.29023e+08	1.23277e+08	9.74134e+07	1.29561e+08	1.67435e+08	1.08032e+08	9.91508e+07	1.77854e+08	1.75174e+08	2.18651e+08
745	521.345	522.352	8.66044	1.37211e+08	1.3775e+08	1.35336e+08	1.35487e+08	1.33449e+08	1.3398e+08	1.2752e+08	1.27159e+08	9.92116e+07	1.09078e+08	1.19998e+08	1.14969e+08	9.11606e+07	1.19644e+08	1.54999e+08	1.00726e+08	9.22008e+07	1.65128e+08	1.61296e+08	2.01556e+08
746	521.347	522.354	8.88756	1.98702e+07	1.79149e+07	1.60068e+07	1.45758e+07	1.3688e+07	1.29117e+07	1.10845e+07	1.12663e+07	8.53585e+06	1.08862e+07	1.01666e+07	1.11362e+07	9.7774e+06	8.82606e+06	1.18645e+07	9.59621e+06	8.47737e+06	1.46515e+07	1.227e+07	1.51852e+07
747	1044.58	523.296	8.18945	5.19639e+06	5.12966e+06	5.30556e+06	5.19986e+06	5.22291e+06	5.04477e+06	4.729e+06	4.68134e+06	3.17677e+06	5.48743e+06	4.0897e+06	5.44819e+06	5.13894e+06	3.5727e+06	4.46949e+06	4.12481e+06	4.24102e+06	5.65259e+06	3.79481e+06	4.3193e+06
748	522.348	523.355	8.66166	4.42128e+07	4.45101e+07	4.36035e+07	4.35519e+07	4.27861e+07	4.26681e+07	4.05111e+07	4.0427e+07	3.14986e+07	3.44101e+07	3.79287e+07	3.63958e+07	2.85963e+07	3.81886e+07	4.93489e+07	3.1653e+07	2.90861e+07	5.24304e+07	5.16621e+07	6.43134e+07
749	1045.58	523.798	8.1982	2.8728e+06	2.86282e+06	2.98001e+06	2.91147e+06	2.90503e+06	2.82193e+06	2.65952e+06	2.64044e+06	1.74346e+06	3.08565e+06	2.30345e+06	3.00243e+06	2.86918e+06	2.02094e+06	2.50795e+06	2.31539e+06	2.44837e+06	3.15469e+06	2.07935e+06	2.42884e+06
750	523.269	524.276	5.89911	528690	522940	529897	548189	517768	506738	512075	505077	1.66604e+06	134224	1.21582e+06	131659	66440.8	126548	980374	651959	1.12499e+06	141822	623275	785025
751	523.265	524.273	7.26731	1.19229e+06	1.13327e+06	1.07569e+06	1.08902e+06	1.06267e+06	1.04417e+06	957054	944647	1.28373e+06	875922	1.44334e+06	1.1257e+06	861465	1.03113e+06	902285	1.00706e+06	987883	718505	1.05668e+06	1.09705e+06
752	523.361	524.368	9.40781	3.79988e+08	3.93634e+08	4.02927e+08	4.12153e+08	4.17734e+08	4.13135e+08	4.09955e+08	4.10327e+08	3.05639e+08	4.80713e+08	4.32461e+08	6.21267e+08	5.02422e+08	3.98145e+08	3.59624e+08	2.45381e+08	2.84761e+08	5.38162e+08	2.67949e+08	3.01952e+08
753	523.361	524.368	9.48226	5.11754e+08	5.16675e+08	5.15136e+08	5.14717e+08	5.10928e+08	4.92836e+08	4.83538e+08	4.79576e+08	3.55621e+08	5.63834e+08	5.02524e+08	7.23742e+08	5.87314e+08	4.58264e+08	4.14582e+08	2.81291e+08	3.26467e+08	6.22918e+08	3.06407e+08	3.46508e+08
754	523.361	524.368	9.62426	1.11655e+08	1.18433e+08	1.29025e+08	1.37521e+08	1.43544e+08	1.43689e+08	1.48492e+08	1.46689e+08	9.91329e+07	1.58372e+08	1.50202e+08	2.14453e+08	1.61583e+08	1.27335e+08	1.13229e+08	7.34748e+07	8.62721e+07	1.46743e+08	8.17351e+07	8.73983e+07
755	523.361	524.368	9.69736	3.46654e+08	3.58505e+08	3.67989e+08	3.77683e+08	3.85693e+08	3.8193e+08	3.80397e+08	3.82325e+08	2.84121e+08	4.51973e+08	4.02198e+08	5.83666e+08	4.73735e+08	3.71614e+08	3.36361e+08	2.29338e+08	2.67296e+08	5.04498e+08	2.50974e+08	2.83337e+08
756	523.361	524.368	9.79981	4.46221e+08	4.53944e+08	4.58269e+08	4.63363e+08	4.64756e+08	4.56098e+08	4.5006e+08	4.4868e+08	3.32409e+08	5.27673e+08	4.70673e+08	6.77941e+08	5.50505e+08	4.33848e+08	3.90793e+08	2.64434e+08	3.076e+08	5.88207e+08	2.88729e+08	3.27877e+08
757	523.361	524.368	9.92029	5.51193e+08	5.51817e+08	5.46294e+08	5.4269e+08	5.35462e+08	5.12259e+08	5.01171e+08	4.94883e+08	3.65993e+08	5.82211e+08	5.17823e+08	7.46398e+08	6.04487e+08	4.69711e+08	4.258e+08	2.87603e+08	3.34054e+08	6.40652e+08	3.14016e+08	3.55589e+08
758	523.361	524.368	10.0755	4.23145e+08	4.22317e+08	4.16683e+08	4.12116e+08	4.00422e+08	3.91125e+08	3.851e+08	3.85867e+08	2.88525e+08	4.62049e+08	4.04876e+08	5.81156e+08	4.83953e+08	3.80779e+08	3.43378e+08	2.30613e+08	2.6905e+08	5.27852e+08	2.53027e+08	2.90912e+08
759	523.361	524.368	17.1214	308330	276016	243851	232262	236512	183393	175050	145503	106099	173927	148819	225158	178605	125663	119340	73964.3	97479.7	174203	85029.6	95496.1
760	525.283	526.291	7.35755	1.51473e+07	1.47213e+07	1.44381e+07	1.44579e+07	1.43189e+07	1.41463e+07	1.34356e+07	1.32557e+07	1.7419e+07	1.41427e+07	2.14047e+07	1.747e+07	1.38356e+07	1.73461e+07	1.39413e+07	1.1694e+07	1.35952e+07	1.05004e+07	1.53804e+07	1.44169e+07
761	525.319	526.326	7.58198	514413	511220	522195	534380	523613	513366	525428	564511	724731	203217	800549	280176	202438	1.15956e+06	878637	318085	359827	303630	958831	1.08957e+06
762	527.299	528.307	7.91863	622581	586109	569420	569622	543106	529798	481991	480282	701422	385891	827067	804427	360113	1.11728e+06	615059	324144	423198	467197	681055	668625
763	529.245	530.252	5.09358	152117	147616	151603	141615	139326	140799	138191	143428	367910	1271.38	311558	883.413	1229.62	701686	470641	530.793	572.664	618.219	708316	235462
764	529.245	530.252	5.35969	532761	544810	542386	544533	552576	543730	539362	550897	1.2161e+06	12632.5	1.16313e+06	12186.4	3972.25	3.19029e+06	1.49314e+06	18162.9	4226.69	5353.3	2.62736e+06	1.06265e+06
765	529.285	530.292	3.7321	237055	242751	247408	238946	247663	248291	240125	244369	351761	523606	567596	363184	510411	15457	0	247278	134315	468048	29019.2	545715
766	1059.64	530.829	4.15317	102653	101837	102363	98256.4	100746	94469.2	101250	86950.9	74209.8	385719	120158	619546	405323	73873.7	32723.2	226732	263240	429261	26949.2	66257.7
767	530.006	531.013	0.800954	185882	184678	187621	183065	183418	185618	186355	184217	170785	120950	128308	136880	125024	118642	140326	279314	274069	131822	191255	138703
768	530.238	531.245	7.53644	428737	404241	426390	404609	407957	411019	387415	377392	407645	272040	396646	274866	242201	581886	470604	226562	264599	299892	420620	400999
769	530.333	531.341	14.5291	1.04104e+06	970143	922458	899037	864295	807964	602665	486621	0	0	0	0	0	0	0	0	0	0	0	0
770	531.364	532.372	12.0472	102443	267834	534015	794666	993164	882808	824404	568385	183821	715491	175235	367802	288308	137930	66699.3	140434	131570	167768	88349.8	132656
771	532.264	533.271	4.71645	143921	150828	137478	151284	143650	146499	145586	142891	123074	0	56740	0	0	305630	523407	1648.46	0	614.448	729124	213808
772	535.157	536.164	15.7946	2.57876e+06	2.5107e+06	2.4564e+06	2.42152e+06	2.45589e+06	2.44447e+06	1.99933e+06	1.7315e+06	197253	172687	181275	146860	137810	174346	139167	149216	138648	134586	4.19204e+06	152732
773	535.327	518.323	5.67429	348249	414530	435830	421398	430786	412975	416314	408831	841636	115976	764545	87645.1	135036	127431	550206	376951	421574	150841	570027	399634
774	535.362	536.37	9.16247	1.11297e+06	1.10739e+06	1.10335e+06	1.12675e+06	1.08192e+06	1.0244e+06	900982	892598	452996	721288	634065	758577	586395	487943	1.04842e+06	1.17095e+06	771544	1.4499e+06	1.44423e+06	1.43833e+06
775	536.157	537.164	15.7957	1.10446e+06	1.10222e+06	1.05794e+06	1.04738e+06	1.06537e+06	1.05431e+06	842389	760281	44070	40178.3	45715.7	37324.9	35565.3	35144.8	41566.9	42378.4	28240.4	21002.5	1.87528e+06	34062.9
776	536.187	537.194	0.84547	75012.5	79279.4	85167.6	81067.4	84441.3	79461.1	78816.4	78903.7	19496.9	86718.1	47330.7	97660.2	73956.5	54499	49131.4	32665.6	28874.4	102194	52141.3	96451.1
777	536.313	537.32	4.61312	52761.4	53146.8	54771.9	55476.5	56811.9	55853.2	57486	60258	132145	11716.9	106815	1561.44	4082.09	214471	152820	1568.54	3780.88	4545.7	351432	124192
778	537.242	538.249	5.21717	717001	710109	712227	728172	692776	713583	686231	692796	1.96847e+06	26181.1	1.61454e+06	14532	13360.6	2.72197e+06	770273	9052.8	17383.8	587.385	1.72757e+06	1.37353e+06
779	537.272	538.279	4.18925	7.60532e+06	7.56516e+06	7.54951e+06	7.49828e+06	7.44864e+06	7.49047e+06	7.4604e+06	7.47459e+06	9.67459e+06	43094.7	9.15881e+06	34244.7	19171.8	1.066e+07	8.59688e+06	135529	199059	54609.7	1.01373e+07	8.80861e+06
780	537.376	538.384	10.8128	2.62267e+06	3.29645e+06	4.28312e+06	5.64187e+06	6.80077e+06	7.29372e+06	7.89376e+06	7.9873e+06	4.07218e+06	1.01969e+07	8.90967e+06	1.04192e+07	9.95076e+06	3.54691e+06	5.99269e+06	7.24948e+06	5.64232e+06	1.04688e+07	7.80545e+06	9.32032e+06
781	537.377	538.385	10.8834	7.82461e+06	9.18833e+06	1.05696e+07	1.17924e+07	1.25524e+07	1.20362e+07	1.22239e+07	1.18579e+07	6.36159e+06	1.49792e+07	1.27667e+07	1.50443e+07	1.45397e+07	4.95044e+06	8.39647e+06	1.09501e+07	8.49872e+06	1.50892e+07	1.08572e+07	1.28861e+07
782	537.378	538.385	11.2846	1.13161e+07	1.21576e+07	1.29323e+07	1.35793e+07	1.37178e+07	1.26657e+07	1.26281e+07	1.19981e+07	6.42993e+06	1.49765e+07	1.26533e+07	1.48288e+07	1.43515e+07	4.81503e+06	8.08514e+06	1.04824e+07	8.20748e+06	1.46046e+07	1.03771e+07	1.25104e+07
783	537.377	538.384	11.0156	8.54938e+06	9.81422e+06	1.10884e+07	1.21884e+07	1.27483e+07	1.20857e+07	1.21678e+07	1.17008e+07	6.25003e+06	1.473e+07	1.24825e+07	1.46878e+07	1.41972e+07	4.80529e+06	8.12651e+06	1.05075e+07	8.1798e+06	1.46787e+07	1.04757e+07	1.25182e+07
784	538.276	539.283	4.52947	1.74517e+06	1.73124e+06	1.74697e+06	1.70987e+06	1.71218e+06	1.73177e+06	1.70367e+06	1.70235e+06	2.24777e+06	7099.01	2.14413e+06	1259.51	2189.46	2.54199e+06	1.88898e+06	20423.6	50409.9	6979.57	2.35356e+06	2.05499e+06
785	1076.61	539.31	7.6745	1.44162e+06	1.38499e+06	1.36266e+06	1.41527e+06	1.36361e+06	1.32512e+06	1.27387e+06	1.2612e+06	1.51795e+06	1.14705e+06	1.68252e+06	1.13556e+06	1.21761e+06	1.37375e+06	1.35046e+06	798772	699490	1.4772e+06	1.45199e+06	1.56446e+06
786	538.38	539.387	10.9778	1.92847e+06	2.30446e+06	2.73238e+06	3.13547e+06	3.36491e+06	3.18599e+06	3.26418e+06	3.17649e+06	1.67661e+06	4.02524e+06	3.40455e+06	4.01633e+06	3.89324e+06	1.31572e+06	2.23059e+06	2.80884e+06	2.19113e+06	4.06078e+06	2.9295e+06	3.47705e+06
787	540.112	541.119	15.794	3.16711e+06	3.10279e+06	3.0159e+06	2.95072e+06	2.97026e+06	3.04187e+06	2.52455e+06	2.27888e+06	291752	271609	278742	248679	260138	264314	259353	269537	231701	230451	5.72957e+06	253629
788	540.435	541.442	13.9136	1.05303e+06	1.03796e+06	1.00958e+06	1.00886e+06	995882	980581	925902	881397	875976	903258	818183	853388	882846	833523	851002	834656	854500	819018	812275	916793
789	541.112	542.12	15.7932	1.59685e+06	1.54309e+06	1.53893e+06	1.45893e+06	1.48001e+06	1.49003e+06	1.21059e+06	1.08585e+06	194166	187113	173488	155722	169493	157091	168314	168418	137820	139167	2.68446e+06	174431
790	541.316	542.323	7.03972	1.25623e+06	1.31755e+06	1.29643e+06	1.32014e+06	1.29741e+06	1.28051e+06	1.22322e+06	1.22339e+06	1.47097e+06	474251	1.52224e+06	484553	354459	1.9867e+06	1.9547e+06	1.60151e+06	1.26538e+06	889283	3.52084e+06	3.71302e+06
791	541.312	542.319	7.75288	3.1691e+07	3.09621e+07	3.06105e+07	3.06412e+07	3.02045e+07	2.92608e+07	2.80039e+07	2.76319e+07	3.09789e+07	2.34515e+07	3.43195e+07	2.2947e+07	2.3966e+07	3.12316e+07	2.98048e+07	1.84964e+07	1.66072e+07	2.81715e+07	3.15712e+07	3.36548e+07
792	542.319	543.327	7.0299	382928	392646	378144	388876	397497	389738	365233	362294	449242	129570	472916	133342	88252.9	623347	599479	477865	392903	257113	1.05316e+06	1.15328e+06
793	542.314	543.322	7.65817	8.75445e+06	8.60208e+06	8.53575e+06	8.47388e+06	8.35258e+06	8.14554e+06	7.786e+06	7.68469e+06	8.59322e+06	6.545e+06	9.48505e+06	6.44595e+06	6.71253e+06	8.64857e+06	8.2885e+06	5.12265e+06	4.64179e+06	7.83683e+06	8.85013e+06	9.36902e+06
794	543.26	544.267	5.21829	630102	630273	613674	628941	619794	644697	620380	612749	1.52146e+06	34143.1	1.3394e+06	14495.8	17055.8	1.91314e+06	713490	10888.9	16442.4	979.296	1.46321e+06	1.20353e+06
795	543.329	544.336	7.45543	7.48963e+07	7.47759e+07	7.37789e+07	7.49562e+07	7.48787e+07	7.45779e+07	7.33324e+07	7.32602e+07	1.02379e+08	2.96895e+07	1.10275e+08	4.00751e+07	2.93106e+07	1.68257e+08	1.2569e+08	4.48848e+07	4.79903e+07	4.21551e+07	1.3316e+08	1.54908e+08
796	543.329	544.337	7.60013	7.64067e+07	7.59998e+07	7.49545e+07	7.6083e+07	7.58174e+07	7.55756e+07	7.41453e+07	7.4024e+07	1.03441e+08	2.98386e+07	1.11364e+08	4.03792e+07	2.9499e+07	1.69834e+08	1.26993e+08	4.53293e+07	4.83841e+07	4.25739e+07	1.34523e+08	1.56523e+08
797	543.329	544.337	8.60988	2.73246e+07	2.68771e+07	2.62278e+07	2.57858e+07	2.52562e+07	2.49524e+07	2.20353e+07	2.19152e+07	1.7768e+07	1.76653e+07	2.03797e+07	1.83879e+07	1.50531e+07	2.06134e+07	2.48939e+07	1.69539e+07	1.57648e+07	2.47083e+07	2.55413e+07	3.05626e+07
798	544.33	545.337	8.50443	7.48351e+06	7.36553e+06	7.22234e+06	7.10544e+06	6.98232e+06	6.92615e+06	6.15348e+06	6.10748e+06	4.9983e+06	4.9175e+06	5.70435e+06	5.08455e+06	4.2025e+06	5.84453e+06	6.96669e+06	4.68328e+06	4.45536e+06	6.91744e+06	7.16186e+06	8.55577e+06
799	544.349	545.356	15.0008	2.56422e+06	2.36097e+06	2.26018e+06	2.17097e+06	2.16288e+06	2.02035e+06	1.59834e+06	1.37382e+06	0	0	0	0	0	0	662.256	0	0	0	0	0
800	545.273	546.281	7.49816	312648	315043	305848	301238	305272	313094	302663	304711	161865	309620	273942	240927	186493	244721	263069	242816	576278	221015	199682	392578
801	545.346	546.353	7.60809	0	0	0	0	0	0	0	0	0	1117.43	0	0	10474.1	0	0	0	0	0	0	0
802	545.346	546.353	7.8822	1.09619e+07	1.12868e+07	1.12854e+07	1.16028e+07	1.17665e+07	1.16872e+07	1.11979e+07	1.118e+07	1.62641e+07	6.33705e+06	1.70035e+07	7.79805e+06	8.81599e+06	1.82304e+07	1.62865e+07	7.9318e+06	6.50669e+06	1.4074e+07	1.94847e+07	2.3833e+07
803	545.346	568.335	8.07797	6.52115e+07	6.42299e+07	6.43414e+07	6.37215e+07	6.50071e+07	6.38068e+07	6.42689e+07	6.36867e+07	7.4724e+07	4.24334e+07	7.74912e+07	4.57027e+07	3.64381e+07	1.30025e+08	9.30381e+07	3.46163e+07	4.16677e+07	5.23061e+07	8.48779e+07	8.86476e+07
804	545.332	546.339	8.47405	951668	908701	890118	902966	899044	878117	768398	799012	601121	674226	700744	696632	543334	677660	877306	619131	586857	918949	858615	1.06138e+06
805	545.343	546.35	9.41412	9.62816e+07	9.82149e+07	1.00331e+08	1.01547e+08	1.02097e+08	9.21594e+07	8.64387e+07	8.38625e+07	5.62542e+07	8.49522e+07	7.48624e+07	9.69399e+07	8.42464e+07	1.02369e+08	7.41717e+07	4.79418e+07	5.30379e+07	9.59885e+07	5.59441e+07	6.21369e+07
806	545.343	546.35	9.61635	1.27103e+08	1.27137e+08	1.26986e+08	1.2594e+08	1.23698e+08	1.0528e+08	9.66542e+07	9.21894e+07	6.20925e+07	9.3828e+07	8.25026e+07	1.07319e+08	9.31777e+07	1.10508e+08	8.0011e+07	5.2405e+07	5.7805e+07	1.05991e+08	6.0384e+07	6.71639e+07
807	545.342	546.35	9.81017	1.4843e+08	1.46782e+08	1.46012e+08	1.4433e+08	1.42016e+08	1.21374e+08	1.11611e+08	1.06083e+08	6.86055e+07	1.09973e+08	9.5514e+07	1.25292e+08	1.09199e+08	1.28928e+08	9.15313e+07	5.60846e+07	6.16903e+07	1.21406e+08	6.62611e+07	7.55155e+07
808	545.342	546.35	9.9217	1.64778e+08	1.61689e+08	1.59352e+08	1.56548e+08	1.5326e+08	1.30602e+08	1.19798e+08	1.13287e+08	7.36556e+07	1.18118e+08	1.02758e+08	1.34951e+08	1.16744e+08	1.34238e+08	9.65816e+07	5.94388e+07	6.55218e+07	1.28723e+08	6.97701e+07	7.93545e+07
809	545.342	546.35	10.0971	6.74078e+07	6.35962e+07	6.04402e+07	5.73865e+07	5.39217e+07	4.2797e+07	3.76143e+07	3.4303e+07	2.03588e+07	3.77676e+07	3.17334e+07	4.46499e+07	3.75993e+07	6.05306e+07	2.71922e+07	1.37338e+07	1.49186e+07	4.1305e+07	1.76727e+07	2.13281e+07
810	545.342	546.35	10.8033	3.26593e+07	2.7884e+07	2.42231e+07	2.11706e+07	1.79326e+07	1.26911e+07	1.13951e+07	9.28157e+06	5.13455e+06	1.05142e+07	8.41568e+06	1.16787e+07	8.99621e+06	6.25887e+06	6.50099e+06	2.82873e+06	3.2425e+06	9.49179e+06	3.87184e+06	4.96329e+06
811	545.342	546.35	11.0061	2.58391e+07	2.18407e+07	1.89507e+07	1.65626e+07	1.39304e+07	9.43653e+06	8.42698e+06	6.74753e+06	3.22431e+06	7.36897e+06	5.7557e+06	7.98958e+06	6.15577e+06	4.40667e+06	4.70182e+06	1.59529e+06	1.85573e+06	6.8502e+06	2.62822e+06	3.58914e+06
812	1092.58	547.296	7.6771	1.55168e+06	1.64529e+06	1.74842e+06	1.63664e+06	1.58489e+06	1.64125e+06	1.61906e+06	1.54533e+06	1.82968e+06	1.40183e+06	2.17674e+06	1.42106e+06	1.51004e+06	1.83646e+06	1.7646e+06	1.07424e+06	863955	1.86984e+06	1.95285e+06	2.08606e+06
813	547.362	548.369	8.83853	6.58589e+06	6.6412e+06	6.62667e+06	6.60468e+06	6.65498e+06	6.38905e+06	5.66464e+06	5.60199e+06	6.0786e+06	5.71374e+06	7.09469e+06	5.81747e+06	5.79696e+06	5.9446e+06	4.78216e+06	3.19819e+06	2.61731e+06	7.15687e+06	5.71746e+06	5.85331e+06
814	1096.61	549.312	8.48232	1.28957e+06	1.3062e+06	1.3685e+06	1.35901e+06	1.36945e+06	1.39374e+06	1.17933e+06	1.19033e+06	917827	970874	1.221e+06	1.05924e+06	804977	1.2219e+06	1.60499e+06	909731	829684	1.67079e+06	1.73496e+06	2.25103e+06
815	549.277	550.284	3.69734	254711	264560	263442	259767	248040	245331	267856	259693	148625	17740.9	19165.1	25122.6	12004.4	126806	2970.48	21561.9	4388.33	1106.06	29198.5	27010.6
816	549.376	550.384	9.99656	9.01264e+06	9.12837e+06	9.14091e+06	9.1441e+06	9.12562e+06	8.66065e+06	8.41558e+06	8.1572e+06	4.85626e+06	9.92749e+06	5.81641e+06	7.15908e+06	8.02238e+06	3.97466e+06	5.35123e+06	7.43104e+06	6.09202e+06	1.02539e+07	9.73755e+06	1.06664e+07
817	549.377	550.384	10.0955	6.13172e+06	6.53415e+06	6.85918e+06	7.13154e+06	7.34398e+06	7.19112e+06	7.04402e+06	6.88422e+06	4.07358e+06	8.37114e+06	4.90562e+06	6.06248e+06	6.79087e+06	3.46686e+06	4.62293e+06	6.32912e+06	5.18569e+06	8.79555e+06	8.36009e+06	9.19054e+06
818	549.376	550.383	10.1774	8.27268e+06	8.45822e+06	8.50305e+06	8.55958e+06	8.55938e+06	8.16595e+06	7.9246e+06	7.68564e+06	4.57829e+06	9.39873e+06	5.50255e+06	6.77701e+06	7.59996e+06	3.7728e+06	5.08125e+06	7.02786e+06	5.75427e+06	9.78313e+06	9.21288e+06	1.01335e+07
819	1100.61	551.31	7.62979	515901	496465	472097	473487	497555	455863	442877	427877	557048	216373	579947	264861	196161	684573	617504	277596	298054	275756	607550	674465
820	1100.64	551.328	9.6882	3.39939e+06	3.32984e+06	3.32528e+06	3.58542e+06	3.39315e+06	2.85624e+06	2.55089e+06	2.60089e+06	1.98149e+06	3.14477e+06	2.954e+06	4.07887e+06	3.3226e+06	2.11317e+06	2.17842e+06	1.41834e+06	1.78436e+06	3.41894e+06	1.53098e+06	1.82931e+06
821	551.222	552.229	4.34824	610011	600686	617110	597767	604916	592819	601538	604836	1.08345e+06	0	960681	0	0	1.06029e+06	897872	958.338	1743.36	0	970987	988703
822	551.393	552.401	17.1217	11157.5	17762.6	17631.5	27594.2	93544.8	164293	180505	184403	214151	342787	294060	273741	359678	85052.4	44858.9	87971.2	69526.7	147794	100244	144456
823	552.29	553.297	10.3073	2.43571e+06	2.38637e+06	2.50607e+06	2.50066e+06	2.34613e+06	1.29312e+06	1.12406e+06	880681	886028	818173	837187	671297	671252	724066	716960	752439	712063	532897	691165	588440
824	552.29	553.297	10.3976	2.59915e+06	2.55087e+06	2.68016e+06	2.67487e+06	2.50457e+06	1.39355e+06	1.21198e+06	949337	959749	885829	906601	727458	732097	780543	768542	815916	771397	584875	745262	634419
825	553.237	554.244	4.11117	1.81943e+06	1.77776e+06	1.80869e+06	1.81888e+06	1.79604e+06	1.78532e+06	1.79298e+06	1.81466e+06	1.87805e+06	23068	1.77534e+06	20385.6	9106.7	1.36356e+06	1.74513e+06	56960.7	97904.7	27315.2	1.56902e+06	1.8583e+06
826	553.238	554.245	4.57202	1.94553e+06	1.92013e+06	1.96584e+06	1.91007e+06	1.89527e+06	1.89861e+06	1.8906e+06	1.90313e+06	2.29721e+06	14440.2	2.10486e+06	15673.1	6168.92	2.46576e+06	1.86391e+06	49233.5	85966.7	19094.6	2.22162e+06	2.06086e+06
827	558.123	559.13	10.7256	3.16627e+06	3.00236e+06	2.92989e+06	2.80544e+06	2.77948e+06	2.22346e+06	2.05494e+06	1.79587e+06	324577	320416	309138	268020	254378	327211	276149	264525	252598	237103	306966	234719
828	1116.58	559.297	7.63198	587829	627744	630125	606355	571499	585955	580020	534149	693224	282249	754486	376487	306849	930868	840091	395044	387258	405572	823091	896233
829	558.328	559.336	12.0484	866584	655952	577505	534601	478443	266474	241358	116794	0	0	0	0	0	0	0	0	0	0	0	0
830	559.124	560.131	10.7247	1.44832e+06	1.35882e+06	1.34213e+06	1.27025e+06	1.26763e+06	1.01097e+06	921498	826558	141693	134931	132300	109071	115771	144607	108831	107085	115352	98866.2	131178	95991
831	559.254	560.261	4.45772	1.6719e+06	1.59538e+06	1.65133e+06	1.62918e+06	1.59952e+06	1.60124e+06	1.60399e+06	1.57481e+06	1.80544e+06	9749.57	2.01803e+06	8163.67	2433.17	1.28456e+06	1.89008e+06	66988.8	98405.7	8509.46	1.41826e+06	1.77319e+06
832	559.254	560.262	4.51789	1.19388e+06	1.14052e+06	1.18146e+06	1.16539e+06	1.12237e+06	1.12295e+06	1.13949e+06	1.1175e+06	1.30592e+06	4186.9	1.544e+06	6224.71	1389.53	942753	1.49949e+06	36005.2	51230.8	0	1.06174e+06	1.32099e+06
833	559.254	560.262	4.56729	1.15178e+06	1.09864e+06	1.14467e+06	1.12634e+06	1.08459e+06	1.08582e+06	1.10206e+06	1.08682e+06	1.2618e+06	4186.9	1.49759e+06	6224.71	1389.53	906848	1.42044e+06	36005.2	51230.8	0	995505	1.27922e+06
834	559.327	560.334	6.02227	1.18036e+06	1.18369e+06	1.18026e+06	1.17419e+06	1.16947e+06	1.20095e+06	1.16293e+06	1.13344e+06	4.53619e+06	70224.8	3.13633e+06	58043.7	40283.9	378705	2.45285e+06	1.28477e+06	2.08845e+06	128711	2.11147e+06	2.57473e+06
835	559.36	560.367	12.044	4.84922e+06	4.71628e+06	4.70985e+06	4.63383e+06	4.28169e+06	3.13805e+06	2.71497e+06	2.21102e+06	952182	2.4443e+06	1.87866e+06	2.0136e+06	1.88566e+06	510622	953411	1.08456e+06	850133	1.67295e+06	1.07512e+06	1.38571e+06
836	560.347	561.355	4.16333	238781	241896	235215	244149	241206	243016	238844	236215	689870	0	679377	0	0	2.24129e+06	1.12309e+06	0	581.715	0	1.61103e+06	517367
837	560.347	561.354	4.48025	83195.1	87554.9	90704.3	86406.8	91169.2	93148.5	86817.6	108203	666817	0	392598	0	0	1.56031e+06	234602	0	0	0	1.05473e+06	429619
838	1124.61	563.31	7.60224	434053	412126	402332	418974	379538	386544	377257	371834	531446	187270	560451	231437	181677	684336	605015	228026	271144	220514	603582	648856
839	562.328	563.335	4.99354	98559.6	104054	94928.9	94380.1	100346	96660.6	101226	97930.2	89949.6	0	89482.3	0	0	374701	310828	617.733	0	2472.77	639530	212645
840	563.298	564.305	7.02965	167237	182540	172754	182932	191656	188148	206011	209601	268407	67899	288590	63253.1	49108.2	417891	401873	304361	243355	167843	734548	780647
841	565.316	566.323	7.09664	809119	828847	814616	835032	826974	831318	789808	785809	994412	482612	1.09522e+06	564092	377324	2.21915e+06	1.17823e+06	380583	463397	656588	951848	965880
842	565.88	566.888	17.0876	1.02053e+06	886845	857073	851733	831190	664216	532488	423235	456576	452973	367888	335839	320561	320628	319947	308944	323135	282101	317246	339107
843	566.319	567.327	7.09601	250953	268729	268153	273236	262460	271461	242866	240875	324917	143275	353784	169562	104289	721746	381369	101425	148311	211683	315953	313991
844	566.315	567.322	7.60689	2.67078e+06	2.61746e+06	2.54823e+06	2.56175e+06	2.59542e+06	2.56848e+06	2.46815e+06	2.46103e+06	3.0656e+06	1.16296e+06	3.25789e+06	1.47967e+06	1.17315e+06	4.42773e+06	3.68799e+06	1.76584e+06	1.92085e+06	1.4725e+06	3.63958e+06	4.02817e+06
845	567.329	568.336	7.39893	6.33404e+07	6.3163e+07	6.37908e+07	6.38344e+07	6.47906e+07	6.34864e+07	6.36668e+07	6.31182e+07	7.35351e+07	4.21479e+07	7.63772e+07	4.51245e+07	3.54314e+07	1.28295e+08	9.18309e+07	3.37649e+07	4.11337e+07	5.06458e+07	8.2951e+07	8.5693e+07
846	567.329	568.337	7.538	6.39633e+07	6.3668e+07	6.42429e+07	6.42545e+07	6.51507e+07	6.38162e+07	6.39723e+07	6.34113e+07	7.38248e+07	4.23018e+07	7.66773e+07	4.52637e+07	3.55299e+07	1.28857e+08	9.2266e+07	3.38514e+07	4.12949e+07	5.08261e+07	8.32937e+07	8.60168e+07
847	567.328	568.335	8.06271	6.80506e+07	6.73578e+07	6.7611e+07	6.77453e+07	6.87063e+07	6.73291e+07	6.71208e+07	6.64809e+07	7.81665e+07	4.40366e+07	8.09997e+07	4.7224e+07	3.75609e+07	1.34407e+08	9.6574e+07	3.58309e+07	4.32272e+07	5.39221e+07	8.80151e+07	9.12959e+07
848	569.331	570.338	4.17669	423255	422322	426052	422392	414972	431696	444071	420649	14702.3	0	22273.9	0	0	1102.46	6192.05	678.576	0	0	14292.1	3127.42
849	569.346	570.353	7.8535	2.47495e+06	2.49704e+06	2.52593e+06	2.60528e+06	2.62336e+06	2.65146e+06	2.53408e+06	2.51208e+06	3.07924e+06	1.69566e+06	3.87205e+06	1.99916e+06	1.49452e+06	4.93469e+06	3.26798e+06	1.19583e+06	1.23757e+06	2.12961e+06	3.54454e+06	4.17597e+06
850	569.345	570.353	8.14327	3.80929e+06	3.68933e+06	3.62533e+06	3.69729e+06	3.60584e+06	3.54153e+06	3.46015e+06	3.46367e+06	4.47797e+06	1.73142e+06	4.4686e+06	2.69066e+06	1.4919e+06	1.1118e+07	5.68225e+06	1.63901e+06	1.94887e+06	3.11975e+06	6.07616e+06	5.55768e+06
851	1140.58	571.297	7.60271	428995	453462	440859	414019	391626	421645	429513	393052	538032	213423	631228	260184	213507	841527	700168	261643	292383	274426	730011	803281
852	570.35	571.357	7.85031	1.12859e+06	1.16395e+06	1.17596e+06	1.21908e+06	1.19426e+06	1.24244e+06	1.18905e+06	1.16969e+06	1.42584e+06	701397	1.64658e+06	912355	606158	2.69104e+06	1.65862e+06	575581	630425	974915	1.75205e+06	1.82796e+06
853	571.361	572.368	8.52553	1.15289e+06	1.14871e+06	1.16716e+06	1.14973e+06	1.12758e+06	1.15818e+06	1.08711e+06	1.08536e+06	1.10696e+06	604760	1.26015e+06	825138	509348	2.14918e+06	1.52174e+06	644683	707585	1.04559e+06	1.5467e+06	1.53427e+06
854	571.837	572.845	0.815886	98020.6	90137.2	95294.6	94325.9	87573.1	90889.4	100568	95568.9	87957.1	89671.4	123314	122018	94079.8	99854.5	108713	78820.3	71913.9	136915	113154	121872
855	572.419	573.427	13.0884	0	1.66805e+06	1.66543e+06	1.56115e+06	1.56676e+06	1.49884e+06	1.44084e+06	1.13271e+06	1.04864e+06	0	0	0	0	0	0	0	0	0	0	0
856	580.409	581.417	15.5697	1.46509e+06	1.37179e+06	1.37435e+06	1.39219e+06	1.389e+06	1.39381e+06	1.36625e+06	1.27112e+06	0	0	0	637.146	0	0	0	0	0	0	0	0
857	582.315	583.322	10.7622	4.0649e+06	3.96824e+06	3.82878e+06	3.80083e+06	3.6292e+06	2.7373e+06	2.65367e+06	2.34315e+06	619832	1.19518e+06	537181	892750	702250	986058	1.1513e+06	1.07829e+06	1.18217e+06	848895	1.42794e+06	1.02959e+06
858	583.326	584.334	5.98414	1.26627e+06	1.25756e+06	1.25073e+06	1.26104e+06	1.24866e+06	1.24945e+06	1.22768e+06	1.24542e+06	4.96858e+06	83222.4	3.56436e+06	52648.1	34317.7	565248	3.28367e+06	762261	1.39838e+06	151426	2.04368e+06	2.07727e+06
859	584.462	585.469	13.7119	717091	700743	683339	668596	686056	660639	644373	606452	578462	613386	570192	573173	606813	577614	570007	555135	585849	564016	567507	627733
860	585.342	586.349	6.41837	111947	111306	121169	111861	111026	114259	103987	104651	493193	1123.15	344092	0	0	59330	325530	59080.2	117500	6419.98	226303	216808
861	1172.61	587.31	7.53443	310814	316415	310460	316397	324648	315369	296298	289287	365351	173839	364666	194066	128647	573531	431547	131202	181404	174673	342691	351911
862	586.436	587.443	7.97425	165150	154928	152633	151759	146325	140081	141112	140278	90291.3	66461.3	100917	58414.1	47021.9	320278	191574	178657	227285	98098	53093	97853.3
863	590.308	591.315	4.18253	248924	240753	251817	244220	243434	254468	251882	243343	533141	23215.4	910839	1493.14	4154.38	840366	667699	6974.52	2850.5	8709.23	1.69256e+06	1.625e+06
864	591.311	592.318	4.18223	183544	171465	175733	176614	188446	181111	174190	173317	191660	1345.94	338475	0	605.64	312657	242514	1223.82	0	615.576	616619	592500
865	592.324	593.332	4.16308	680191	699132	698163	700943	671568	705080	696329	700376	2.85417e+06	88888.8	2.21988e+06	7139.72	21945.4	3.04772e+06	1.92198e+06	29119.8	17938.8	95476.8	3.54942e+06	3.93845e+06
866	1188.58	595.296	7.53442	268996	288652	311653	279965	303763	280614	305615	259423	343563	170691	361857	178094	121729	572663	442176	137235	191436	201523	349092	343482
867	594.339	595.347	4.16747	399261	399411	405087	405209	405333	414435	407908	409024	567379	54854.8	609710	1797.96	4740.17	1.20547e+06	1.55675e+06	12747.1	4532.26	157876	1.76417e+06	1.67723e+06
868	594.425	595.432	16.0199	5.57133e+06	5.46177e+06	5.43843e+06	5.46904e+06	5.52002e+06	5.77928e+06	5.75857e+06	5.59415e+06	1158.25	0	0	0	0	0	550.854	0	0	0	514.728	0
869	1193.55	597.784	3.6497	984709	1.00117e+06	1.00162e+06	973485	1.00002e+06	977674	982052	1.00665e+06	1.02466e+06	1.05815e+06	1.10876e+06	1.84309e+06	949520	586987	1.60123e+06	1.00631e+06	678169	1.02173e+06	894993	1.10447e+06
870	598.332	599.339	3.78687	317396	328121	333354	342271	329314	321803	326530	328141	21419.4	2952.16	2841	4300.5	3538.73	16221.1	0	27524.5	3208.49	973.248	13066.4	10367.4
871	602.283	603.29	7.56777	2.41734e+06	2.35614e+06	2.4007e+06	2.41519e+06	2.44471e+06	2.4506e+06	2.42177e+06	2.42966e+06	1.36359e+06	2.53594e+06	1.15199e+06	1.95362e+06	1.98161e+06	1.66776e+06	1.68653e+06	1.81299e+06	1.45108e+06	3.06354e+06	2.12543e+06	2.17675e+06
872	602.429	603.437	16.4511	2.52795e+06	2.34126e+06	2.31257e+06	2.26618e+06	2.25228e+06	2.04455e+06	1.85118e+06	1.68039e+06	2772.36	0	0	0	0	561.648	0	0	0	0	634.248	0
873	612.152	613.159	1.21429	109256	105005	112117	112443	108713	105969	98404.3	104830	281876	118976	583837	179466	343044	321808	102268	65058.1	68586.3	233056	100537	111005
874	1226.68	614.345	3.92017	185712	182666	177434	181585	187976	192843	190189	187999	266979	352486	528853	160584	718798	43818.5	162861	157931	83683.9	280441	203333	220074
875	615.169	616.176	5.6697	3.55034e+06	3.52154e+06	3.45324e+06	3.51885e+06	3.49957e+06	3.44227e+06	3.35986e+06	3.33456e+06	1.35459e+07	6.91834e+06	5.66003e+06	1.00188e+06	2.45904e+06	1.61844e+07	6.77608e+06	1.16872e+07	1.92333e+07	5.91008e+06	3.78536e+07	3.66961e+07
876	615.169	616.176	5.75656	3.38647e+06	3.36409e+06	3.30119e+06	3.35783e+06	3.33598e+06	3.28632e+06	3.2027e+06	3.1748e+06	1.30031e+07	6.61427e+06	5.40771e+06	945010	2.33825e+06	1.55508e+07	6.4596e+06	1.11894e+07	1.84934e+07	5.6276e+06	3.63891e+07	3.52398e+07
877	620.293	643.282	7.56325	1.22847e+06	1.18941e+06	1.20577e+06	1.19385e+06	1.2216e+06	1.22806e+06	1.18713e+06	1.21743e+06	612353	1.3596e+06	517208	1.03027e+06	1.08606e+06	690087	714307	1.01051e+06	809480	1.51223e+06	909762	909251
878	621.398	622.405	10.8114	1.93738e+06	2.09702e+06	2.14168e+06	2.20399e+06	2.09235e+06	1.82862e+06	1.78035e+06	1.65956e+06	2269.85	0	0	636.048	561.624	1490.95	569.928	740.496	590.352	0	1752.26	533.616
879	622.309	623.316	10.6946	5.22832e+06	4.86398e+06	4.70367e+06	4.58269e+06	4.33834e+06	3.16395e+06	2.99664e+06	2.56607e+06	718035	1.30731e+06	554917	883637	701375	997673	1.20219e+06	1.15796e+06	1.25103e+06	854572	1.51857e+06	1.07893e+06
880	622.308	623.315	10.8598	4.82619e+06	4.49503e+06	4.35046e+06	4.25384e+06	4.02823e+06	2.916e+06	2.77825e+06	2.38591e+06	696901	1.27215e+06	550209	869051	691609	948617	1.1381e+06	1.08795e+06	1.17062e+06	823401	1.41826e+06	1.01017e+06
881	626.524	627.531	10.8113	0	499.824	0	0	575.808	0	0	0	577.68	1299.22	6485.95	1.74664e+06	1.76133e+06	1.7994e+06	1.69041e+06	1.66533e+06	1.66911e+06	1.28299e+06	1.74123e+06	817089
882	626.524	627.531	11.0192	0	0	0	0	0	0	0	0	0	0	11132.6	1.79311e+06	1.87223e+06	1.89022e+06	1.83137e+06	1.63691e+06	1.65344e+06	1.48263e+06	1.79544e+06	908914
883	626.525	627.532	17.1208	0	0	0	1498.58	531.576	0	0	0	0	0	545321	634906	665892	639270	629591	631665	593521	699740	592970	452095
884	632.141	633.149	12.0003	3.12242e+06	3.00054e+06	3.01225e+06	2.91724e+06	2.96473e+06	2.76338e+06	2.60288e+06	2.06124e+06	386643	338266	315550	267369	255043	306958	226340	203891	203451	195457	223467	218203
885	633.142	634.149	12.0002	1.71175e+06	1.6289e+06	1.62076e+06	1.60614e+06	1.6089e+06	1.51294e+06	1.40705e+06	1.08757e+06	216686	182261	168649	131564	137160	160241	117776	101837	106412	91531.6	116012	118236
886	633.868	634.875	0.813027	298692	299738	301756	306107	303121	293679	302580	302844	298099	358912	281221	313946	284903	352551	279761	167123	184814	229920	292238	295891
887	634.14	635.147	12.0002	1.17168e+06	1.11602e+06	1.10028e+06	1.07761e+06	1.08142e+06	1.02299e+06	950525	753283	139156	118768	107568	88414.6	86767.6	106318	76262.9	64717.1	64767.9	67128.9	75275.1	76675.1
888	642.275	643.282	7.32368	1.18499e+06	1.15088e+06	1.16418e+06	1.15621e+06	1.18942e+06	1.19906e+06	1.16874e+06	1.2034e+06	615476	1.3607e+06	528651	1.05377e+06	1.08651e+06	710896	724110	1.01145e+06	818017	1.52605e+06	919526	905264
889	643.38	644.387	10.8377	2.06028e+06	2.07658e+06	2.01179e+06	1.8808e+06	1.64826e+06	1.21462e+06	1.09967e+06	940208	0	0	0	0	523.224	557.304	0	0	0	0	0	573.84
890	1322.59	662.305	3.62954	691047	723884	724269	675229	678242	721398	699814	702335	748069	579520	804701	613139	453637	1.03256e+06	813025	879343	661785	848401	888578	839148
891	1323.6	662.806	3.62877	476419	465924	477973	456755	460853	480616	457688	456098	493660	388867	538260	428057	301129	699165	554859	597607	435843	580639	612880	546194
892	662.445	685.434	13.503	3.997e+06	1.01903e+07	1.00717e+07	9.72759e+06	9.84159e+06	9.54882e+06	8.55242e+06	6.95816e+06	6.50077e+06	4.0374e+06	2.83916e+06	2.33468e+06	2.4375e+06	2.51204e+06	2.13304e+06	2.1886e+06	3.44922e+06	1.92545e+06	2.44513e+06	3.3496e+06
893	684.427	685.434	13.3916	4.08855e+06	1.02722e+07	1.01539e+07	9.81217e+06	9.92261e+06	9.62893e+06	8.62709e+06	7.00841e+06	6.5391e+06	4.07096e+06	2.86592e+06	2.3574e+06	2.46186e+06	2.52939e+06	2.15296e+06	2.2045e+06	3.46453e+06	1.93479e+06	2.45941e+06	3.38391e+06
894	684.427	685.434	13.5412	3.63791e+06	9.79553e+06	9.6622e+06	9.34949e+06	9.45396e+06	9.16927e+06	8.20037e+06	6.6899e+06	6.27604e+06	3.84351e+06	2.65307e+06	2.18551e+06	2.27791e+06	2.35393e+06	1.99521e+06	2.04632e+06	3.28376e+06	1.79832e+06	2.2856e+06	3.18283e+06
895	700.54	701.547	13.2578	0	25765.3	274909	5.57848e+06	4.61814e+06	4.22105e+06	3.82303e+06	3.21364e+06	3.1472e+06	2.6053e+06	2.46045e+06	4098.01	2085.98	0	501.288	0	516.888	0	0	0
896	700.539	701.546	16.2416	1513.17	600037	747233	4.66663e+06	4.54308e+06	4.45938e+06	4.35689e+06	4.08954e+06	4.58345e+06	3.58397e+06	3.38686e+06	0	0	607.608	615.546	0	0	0	615.648	0
897	701.855	702.863	0.811698	244435	245493	240049	243576	229482	230142	232267	237479	236585	276759	225343	246606	223009	271527	219268	126104	142793	177852	233281	225434
898	702.564	703.571	10.8136	1519.43	0	606.192	19791.8	57145.7	8.31579e+06	8.23711e+06	5.64742e+06	4.36363e+06	3.94212e+06	3.42562e+06	3.02966e+06	2.82139e+06	2.44108e+06	2.38239e+06	2.232e+06	2.23853e+06	2.27425e+06	3.23195e+06	2.68346e+06
899	702.564	703.571	11.0242	1519.43	0	2278.18	44001.9	123235	1.21777e+07	1.17691e+07	8.18567e+06	5.81194e+06	5.72572e+06	5.08049e+06	4.72072e+06	4.24016e+06	4.10279e+06	4.60469e+06	3.60837e+06	4.41314e+06	4.4306e+06	7.87677e+06	5.27778e+06
900	702.564	703.571	17.1219	0	0	0	1458.41	0	358821	554997	578970	584898	563767	571259	553054	445880	438861	490146	443882	473875	348257	552936	432767
901	706.16	707.168	13.156	2.04126e+06	1.94933e+06	1.9081e+06	1.84329e+06	1.8887e+06	1.87322e+06	1.61255e+06	1.27419e+06	363400	325882	302505	255702	261225	304005	241205	231240	249219	209928	236009	242206
902	707.161	708.169	13.1563	1.25649e+06	1.21679e+06	1.20572e+06	1.12374e+06	1.15621e+06	1.15764e+06	985186	759718	217636	183303	170174	150151	151446	186917	142090	137681	138710	139273	143781	141834
903	708.159	709.166	13.156	909767	876769	851014	817403	834875	836797	708138	556387	154836	134235	127623	105107	104508	132963	96396.1	94451.1	101341	90714.5	101579	104139
904	1423.64	712.829	3.62078	1.97645e+06	1.98329e+06	1.97804e+06	1.98437e+06	1.94891e+06	1.95876e+06	1.99334e+06	1.97256e+06	1.96008e+06	2.05367e+06	2.47626e+06	1.77912e+06	1.3488e+06	4.16849e+06	2.07907e+06	2.31126e+06	1.85619e+06	2.73729e+06	2.57905e+06	2.43308e+06
905	714.518	715.526	17.0535	776439	526110	561372	583837	506975	605958	668161	796947	10052	523.176	0	584.064	0	0	0	0	0	0	0	0
906	716.534	717.542	15.8548	392166	1.14338e+06	1.17425e+06	1.18737e+06	1.21701e+06	1.32268e+06	1.48897e+06	1.52334e+06	842742	12024.3	0	0	680.904	523.944	0	0	0	0	0	0
907	716.535	717.542	16.5489	3.29174e+06	3.73892e+06	3.79791e+06	3.79219e+06	3.72762e+06	3.96954e+06	4.13751e+06	4.24408e+06	1.06894e+06	10800	0	0	680.904	0	0	0	0	0	573.312	0
908	721.545	722.552	14.9482	1.90934e+06	1.59658e+06	1.50707e+06	1.46713e+06	1.427e+06	1.42589e+06	1.2974e+06	1.17362e+06	545729	416553	450431	716741	547560	889673	2.00513e+06	1.36588e+06	2.49112e+06	1.11463e+06	1.52354e+06	590336
909	722.531	723.539	11.0241	0	0	610.848	733519	2.14264e+06	1.04265e+06	709601	443757	349238	361781	310320	179217	226020	239400	233052	157801	115515	149362	85641.5	135166
910	724.546	725.554	10.1081	0	0	0	0	1206.76	1.58625e+06	1.69916e+06	1.25854e+06	952315	901428	840561	648869	677415	945840	555040	531688	441328	443963	406616	582731
911	733.561	756.55	10.8096	0	0	46304.1	64942.2	35354	782804	812862	1.18314e+06	1.46745e+06	1.71606e+06	1.87348e+06	2.22734e+06	2.08387e+06	2.32166e+06	2.14909e+06	1.4804e+06	1.75601e+06	1.70813e+06	3.61014e+06	1.78209e+06
912	1499.52	750.769	3.73649	187422	186344	175836	180958	183987	184202	172620	195113	241027	123018	272217	143377	155587	74253.8	310375	332054	229082	256482	276499	225918
913	755.543	778.532	10.8124	584.793	0	1083.79	7184.19	62466.2	572072	599802	872555	817670	1.1583e+06	1.13176e+06	979673	906838	967705	954924	503689	637040	666095	1.71137e+06	802990
914	755.543	756.55	11.0102	0	0	55818.9	55252.7	24803.3	749589	868486	1.53413e+06	1.6581e+06	1.96127e+06	1.98223e+06	2.52865e+06	2.36282e+06	2.40509e+06	2.38355e+06	1.4649e+06	1.69109e+06	2.04082e+06	3.5616e+06	1.94611e+06
915	756.546	757.553	10.8111	0	0	0	0	0	246766	270958	417355	547608	656101	713460	876437	814405	905634	832556	561750	683873	694177	1.40088e+06	692715
916	757.559	758.566	9.92289	542.592	583.752	0	1309.32	673.191	17426	13881.2	3.3413e+07	6.31716e+07	5.16876e+07	4.89707e+07	3.89537e+07	3.97886e+07	5.04914e+07	4.6967e+07	4.13809e+07	4.24341e+07	3.83065e+07	3.83633e+07	4.6229e+07
917	757.558	758.565	10.1091	542.592	583.752	0	1309.32	673.191	19682	15140.5	3.03143e+07	4.9833e+07	4.1018e+07	3.87316e+07	3.15486e+07	3.1656e+07	4.07571e+07	3.66366e+07	3.15721e+07	3.24768e+07	3.05725e+07	2.97813e+07	3.54119e+07
918	757.558	758.565	10.811	2278.47	509.64	0	1280.53	1515.38	50251.9	50310.8	6.78604e+07	6.89406e+07	6.52001e+07	5.75246e+07	4.86852e+07	4.72147e+07	4.8952e+07	5.08838e+07	3.64808e+07	3.89286e+07	4.4428e+07	4.73125e+07	4.76539e+07
919	757.558	758.565	11.0198	2278.47	509.64	587.28	0	1506.94	57272.3	76005.5	8.20826e+07	8.15103e+07	7.52861e+07	6.58852e+07	5.5706e+07	5.39133e+07	5.56727e+07	5.84201e+07	4.36467e+07	4.51699e+07	5.2275e+07	6.01208e+07	5.41823e+07
920	757.559	758.566	17.1227	0	0	0	0	0	2136.39	38220.4	2.93154e+06	3.27387e+06	3.27433e+06	3.24758e+06	3.15748e+06	3.32666e+06	3.21467e+06	3.26795e+06	3.40043e+06	3.4078e+06	2.9663e+06	3.72513e+06	2.91665e+06
921	758.544	759.551	16.4817	2.87321e+06	3.30357e+06	3.28368e+06	3.25781e+06	3.21113e+06	3.22962e+06	3.14032e+06	1.74781e+06	35172.1	0	0	0	0	0	0	0	477.288	0	0	0
922	758.562	759.569	10.1097	0	0	0	0	0	0	0	1.41981e+07	2.32006e+07	1.92055e+07	1.79883e+07	1.46319e+07	1.47278e+07	1.88057e+07	1.69723e+07	1.46301e+07	1.49929e+07	1.41111e+07	1.38086e+07	1.63421e+07
923	759.573	760.58	9.9227	895.488	3254.9	0	2257.25	1225.7	2837.23	1846.8	4.15907e+06	7.93731e+06	5.18991e+06	8.24034e+06	2.27394e+07	2.43381e+07	3.14118e+07	2.75675e+07	2.70738e+07	2.59112e+07	2.1118e+07	2.32547e+07	1.83565e+07
924	759.573	760.58	10.1085	447.744	509.04	0	967.32	0	1438.68	724.296	2.13201e+06	3.64668e+06	1.80446e+06	4.03194e+06	1.14843e+07	1.20441e+07	1.76028e+07	1.3498e+07	1.2572e+07	1.18545e+07	1.06139e+07	1.10985e+07	8.83544e+06
925	759.573	760.58	10.8183	27013.1	20888.6	11223.6	9506.06	4046.86	6062.64	10563.6	1.05137e+07	1.32496e+07	9.33808e+06	2.57821e+07	5.50387e+07	5.37025e+07	5.56194e+07	5.46701e+07	4.66962e+07	4.50571e+07	4.46609e+07	4.39918e+07	3.58221e+07
926	759.575	782.565	11.0222	17160.4	11965	18037.6	16927.2	61900.9	3.59786e+06	3.86729e+07	1.68055e+07	1.41927e+07	2.04739e+07	3.5816e+07	4.60739e+07	4.70885e+07	6.36687e+07	5.97064e+07	3.39974e+07	2.63672e+07	1.18375e+08	3.834e+07	1.01365e+08
927	759.574	760.581	17.1231	0	0	0	571.104	0	0	0	311131	379744	327806	1.13488e+06	1.2622e+06	1.32372e+06	1.30643e+06	1.24101e+06	1.34517e+06	1.23307e+06	1.08885e+06	899280	1.13378e+06
928	1538.67	770.342	3.64793	723306	710285	728241	723517	721272	727066	721877	709550	676906	627938	608671	950942	534894	627405	1.2839e+06	652859	324115	480657	721400	866663
929	769.843	770.85	0.81015	184443	173942	175062	176886	179225	181214	172709	175278	173620	204811	170277	181563	161192	208343	162478	89054.6	105173	127441	170172	169384
930	1539.67	770.844	3.64868	548674	564572	564126	549063	538859	540546	570064	554183	511127	480569	498426	704977	410936	473159	978151	492704	249050	397967	557337	666211
931	1540.65	771.333	3.54265	66981.6	78996.7	70538.6	68981	74772.7	69809.1	70856.3	71633.5	6885.37	0	1400.35	0	0	97866.4	328219	0	0	0	103083	0
932	1540.68	771.345	3.64731	255204	260875	250051	247295	250802	241054	254638	243260	233517	224848	213707	325088	181641	212650	441410	217108	108664	177092	243133	301240
933	1541.65	771.835	3.54211	55865.6	56988.7	55526.7	54915	52865.2	61311.5	56940.5	52585.6	2841.29	0	0	0	0	74479.4	259783	0	0	0	75966.8	0
934	776.555	777.563	16.4363	3.30262e+06	3.18738e+06	3.14156e+06	3.24652e+06	3.18168e+06	3.14752e+06	3.12319e+06	2.99792e+06	45527.1	15117.1	12611.9	22828.8	31561	5908.5	28604.9	16285.1	22301.7	9750.39	12350.4	9755.68
935	777.526	778.533	12.0556	542.088	540.072	0	13212.8	2857.85	529938	1.32022e+06	912915	714913	542667	467144	397543	339185	299608	247978	195954	301445	174297	404512	215297
936	779.542	780.55	7.86039	0	0	0	0	1815.67	69912.2	8009.56	58871.1	2.06911e+06	2.15354e+06	1.95958e+06	1.91051e+06	1.8587e+06	1.77618e+06	1.96589e+06	2.20262e+06	2.4563e+06	1.68804e+06	1.43112e+06	1.6569e+06
937	779.54	780.547	12.0492	0	865.92	543.648	0	116894	338041	373291	1.87276e+07	1.79094e+07	1.49952e+07	1.45451e+07	1.20337e+07	1.15875e+07	1.31319e+07	1.2495e+07	1.20629e+07	1.04301e+07	1.20337e+07	1.72019e+07	1.27762e+07
938	780.18	781.187	14.4366	1.00047e+06	976927	971893	957100	961188	966539	823081	711235	282195	277524	259365	217876	237742	283103	235273	216215	225217	212530	243664	220442
939	780.543	781.551	10.8098	0	0	0	1072.12	126550	109666	171406	7.69301e+06	7.38074e+06	7.20482e+06	6.3444e+06	5.05933e+06	4.66928e+06	5.52118e+06	5.34335e+06	3.19476e+06	3.39815e+06	4.62484e+06	4.39085e+06	4.74256e+06
940	780.543	781.55	11.0038	0	0	0	1638.54	130745	181923	237073	1.2536e+07	9.65584e+06	1.14326e+07	9.297e+06	7.69658e+06	7.38033e+06	7.89432e+06	8.80854e+06	4.45655e+06	4.62258e+06	7.61858e+06	7.59351e+06	7.7224e+06
941	781.18	782.188	14.4335	690683	660934	649482	647681	676721	674849	574317	494637	191953	186929	180827	145315	156447	183464	157228	139630	155332	135549	156691	154764
942	781.557	804.547	10.8028	0	550.752	776.76	19278.2	680418	1.05469e+06	9.03768e+06	3.28085e+06	2.00732e+06	2.27785e+06	3.26022e+06	3.33411e+06	3.55104e+06	6.85564e+06	5.72269e+06	2.38974e+06	1.49451e+06	1.64276e+07	3.45481e+06	1.41214e+07
943	781.557	804.547	11.0214	0	550.752	1371.98	44403.2	729940	1.32399e+06	1.12478e+07	4.33473e+06	2.55625e+06	4.84276e+06	6.60601e+06	6.84322e+06	7.34537e+06	1.12465e+07	1.09986e+07	4.14411e+06	2.76846e+06	2.74257e+07	6.00712e+06	2.29642e+07
944	781.558	782.566	17.1203	0	0	0	0	0	369654	1.78123e+06	1.2535e+06	1.01765e+06	811438	1.51518e+06	1.53419e+06	1.62667e+06	1.55559e+06	1.45742e+06	1.48027e+06	1.26868e+06	1.45833e+06	1.0026e+06	1.48671e+06
945	782.178	783.185	14.4402	520880	524780	497640	507681	505503	514143	433416	373548	143231	141721	137553	122282	113071	142733	121740	111689	117050	106019	123968	118657
946	782.561	783.568	10.8081	2495.34	0	967.977	1178.52	539.016	1.24962e+06	1.42997e+07	5.96632e+06	3.70942e+06	4.63422e+06	9.01952e+06	1.30596e+07	1.34272e+07	1.95777e+07	1.85195e+07	9.37178e+06	7.02192e+06	4.02437e+07	1.21879e+07	3.47768e+07
947	782.561	783.568	11.0203	3007.7	626.64	967.977	1178.52	0	1.52971e+06	1.67626e+07	6.93229e+06	5.65286e+06	8.34247e+06	1.47815e+07	1.9259e+07	1.98481e+07	2.7365e+07	2.55047e+07	1.42213e+07	1.08013e+07	5.22295e+07	1.63371e+07	4.44188e+07
948	782.562	783.569	17.124	0	0	0	0	0	167224	1.04933e+06	709637	592971	463427	876169	904519	947281	922755	850370	850276	718156	871056	566237	883124
949	783.576	806.565	10.8111	0	1758.41	1542.48	5340.44	1.01368e+06	3.56528e+07	2.14565e+07	1.31558e+07	1.0261e+07	9.07684e+06	7.37494e+06	5.99289e+06	5.65064e+06	5.82783e+06	5.57748e+06	4.87141e+06	4.22537e+06	5.45419e+06	5.4662e+06	5.64801e+06
950	783.567	784.574	11.0186	1741.99	0	0	0	4148.46	303211	3.27956e+06	3.26206e+06	2.1341e+06	5.3574e+06	6.24129e+06	6.85736e+06	6.99393e+06	8.43739e+06	9.19422e+06	5.76072e+06	4.01968e+06	1.4011e+07	8.11375e+06	1.2249e+07
951	783.576	806.565	17.1216	0	0	0	0	29836.6	1.64617e+06	1.95047e+06	1.97503e+06	2.05195e+06	1.76907e+06	1.57828e+06	1.52524e+06	1.5102e+06	1.57482e+06	1.49191e+06	1.36422e+06	1.44628e+06	1.29859e+06	1.23314e+06	1.04494e+06
952	784.578	785.585	10.8133	0	0	0	0	2150.86	5188.18	169483	2.13869e+06	2.97065e+06	2.52796e+06	2.18009e+06	1.86448e+06	1.81325e+06	2.01694e+06	2.29754e+06	1.67983e+06	1.51157e+06	2.49035e+06	2.146e+06	2.26771e+06
953	1570.56	786.286	3.73252	909767	924426	954003	944221	919187	928073	914534	949689	1.11263e+06	1.24543e+06	1.7427e+06	1.34032e+06	1.17262e+06	1.08351e+06	1.41914e+06	1.02457e+06	915048	1.68974e+06	905795	1.46061e+06
954	785.589	786.596	9.92279	579.168	592.191	0	0	0	0	0	339244	1.17869e+06	661185	1.18598e+06	8.41322e+06	2.30597e+07	3.17993e+07	2.85246e+07	2.84846e+07	2.72131e+07	2.3948e+07	4.08475e+07	3.15321e+07
955	785.589	786.596	10.1066	579.168	592.191	0	0	0	0	0	280238	789656	431936	824208	6.34922e+06	1.62776e+07	2.29898e+07	1.96701e+07	1.87378e+07	1.79109e+07	1.67048e+07	2.72006e+07	2.1139e+07
956	785.589	786.596	10.813	911.88	566.28	2109.41	769.2	0	2571.06	0	541533	948531	552983	1.61936e+06	1.572e+07	2.92635e+07	3.27061e+07	3.21458e+07	2.55174e+07	2.46421e+07	2.83821e+07	4.10153e+07	3.3405e+07
957	785.589	786.596	11.0211	1699.73	566.28	2186.93	1228.42	1108.97	3908.72	0	664470	1.09952e+06	639665	1.96021e+06	1.98488e+07	3.50713e+07	3.81322e+07	3.74887e+07	3.01855e+07	2.90931e+07	3.47843e+07	4.68832e+07	3.89294e+07
958	785.589	786.596	17.1233	0	0	0	0	0	0	0	46567.1	76941.8	75713.2	189386	1.41252e+06	1.6989e+06	1.69312e+06	1.72812e+06	1.7977e+06	1.76105e+06	2.6094e+06	2.16739e+06	2.02292e+06
959	1571.56	786.788	3.73255	690779	699523	737758	717512	697681	698115	710578	699246	841580	951494	1.36355e+06	991235	868700	809830	1.06827e+06	779180	675445	1.26594e+06	684578	1.10564e+06
960	1572.56	787.29	3.73316	341894	345915	343841	357068	329672	355471	344957	354359	402896	464824	656305	499850	432854	406263	528102	396056	336086	655965	344569	574459
961	786.592	787.6	10.1125	0	617.616	812.256	590.976	763.032	0	0	20605.5	93181.9	25255	309317	3.32304e+06	8.35151e+06	1.17307e+07	1.01519e+07	9.7375e+06	9.31929e+06	8.63373e+06	1.41976e+07	1.09403e+07
962	786.592	787.6	10.814	0	0	0	0	645.786	1285.58	0	70266.4	133716	90672.3	662707	7.56642e+06	1.4006e+07	1.55649e+07	1.5348e+07	1.22836e+07	1.18618e+07	1.37275e+07	1.95311e+07	1.60944e+07
963	786.593	787.6	17.1236	0	0	0	0	0	0	0	1017.14	3685.76	2828.47	57779	452312	562937	565602	560841	588082	575537	849710	720101	665521
964	787.606	810.596	10.8155	0	0	0	0	0	0	272862	403775	637742	1.51827e+07	1.69086e+07	1.2239e+07	1.13e+07	1.18384e+07	1.08334e+07	8.83288e+06	1.14515e+07	9.3798e+06	1.1831e+07	1.24032e+07
965	787.6	788.607	11.0258	1743.14	1784.18	1094.45	0	0	0	1497.13	939.096	0	0	168277	2.06558e+06	3.61012e+06	3.94618e+06	3.94622e+06	3.12336e+06	3.91429e+06	5.70563e+06	6.86795e+06	6.42725e+06
966	1592.54	797.277	3.73162	204311	194374	208426	212117	206861	194072	214234	204410	246694	269530	375701	309902	260321	227411	309721	228289	192483	355430	213713	311069
967	803.54	804.548	10.1101	0	575.952	0	2880.76	133342	583814	5.25319e+06	2.5885e+06	1.3086e+06	1.09082e+06	919362	703532	742555	1.4807e+06	750824	574867	469175	4.26406e+06	1.00628e+06	3.58231e+06
968	803.54	804.547	12.0492	1443.44	5064.77	2950.13	181308	181902	738791	5.84633e+06	8.24653e+06	1.1693e+07	1.2321e+07	1.23386e+07	1.0416e+07	1.01666e+07	1.25392e+07	8.86282e+06	6.45709e+06	5.46383e+06	1.30621e+07	5.62653e+06	1.23903e+07
969	804.543	805.55	10.8067	0	5515.31	6411.04	24421.1	385643	582491	4.92938e+06	1.82373e+06	1.06112e+06	1.24502e+06	1.74992e+06	1.78149e+06	1.91206e+06	3.58972e+06	3.02433e+06	1.303e+06	822064	8.40716e+06	1.81509e+06	7.24701e+06
970	805.558	806.565	10.8176	0	1758.41	1542.48	5474.67	1.00616e+06	3.53399e+07	2.10134e+07	1.2984e+07	1.00178e+07	9.07457e+06	7.38639e+06	5.97567e+06	5.61183e+06	5.81144e+06	5.59256e+06	4.81056e+06	4.17399e+06	5.48338e+06	5.48479e+06	5.58156e+06
971	805.558	806.565	11.0162	0	6868.37	5736.49	24724.5	2.14271e+06	4.7923e+07	2.73819e+07	1.68545e+07	1.29861e+07	1.20388e+07	9.69414e+06	8.04513e+06	7.74502e+06	7.82606e+06	7.80587e+06	6.4257e+06	6.3431e+06	8.79842e+06	9.29685e+06	8.03135e+06
972	805.56	806.567	15.7547	637.032	613.224	1344.94	1964.19	81256.4	3.17009e+06	5.76229e+06	6.83165e+06	7.73519e+06	7.52946e+06	7.26387e+06	6.9322e+06	6.64954e+06	6.93345e+06	6.93863e+06	6.1855e+06	6.59262e+06	6.18315e+06	5.64077e+06	4.83048e+06
973	806.562	807.569	17.1217	0	0	0	1024.1	8370.02	825989	946233	970132	970143	847291	748534	747178	723148	781259	743251	677548	709561	616780	597943	501270
974	807.571	808.578	10.7611	0	0	0	5941.58	0	5.16845e+06	4.17444e+06	3.48797e+06	2.69947e+06	2.5973e+06	3.19973e+06	6.62341e+06	9.8672e+06	1.24767e+07	1.20243e+07	8.34486e+06	7.98317e+06	1.29784e+07	1.44455e+07	1.42737e+07
975	807.571	808.578	12.0522	2182.87	3917.76	1219.15	2555.11	121687	1.00778e+06	1.00576e+06	1.67386e+06	2.32315e+06	2.53167e+06	2.83666e+06	6.19862e+06	7.46992e+06	8.38133e+06	6.64076e+06	5.77148e+06	6.59212e+06	6.98559e+06	7.89894e+06	7.22454e+06
976	807.572	808.579	17.1173	0	0	0	0	1945.51	238780	416506	351770	315513	270526	297312	889881	1.02312e+06	1.02346e+06	964609	1.06191e+06	1.05383e+06	1.40324e+06	1.18299e+06	1.15018e+06
977	809.517	810.524	12.043	0	388665	962875	794884	469668	270703	194740	148997	135682	0	0	1200.26	2684.2	2233.66	0	0	0	0	0	0
978	809.588	810.596	9.92554	0	0	0	0	0	0	203805	314430	589358	7.95751e+06	1.42663e+07	1.0557e+07	1.04552e+07	1.29943e+07	1.07127e+07	1.02147e+07	1.35144e+07	8.30765e+06	1.17134e+07	1.22429e+07
979	809.588	810.596	10.1092	0	0	0	0	0	0	96858.8	156214	300296	4.29223e+06	7.26069e+06	5.4637e+06	5.34833e+06	7.31999e+06	5.42855e+06	4.95569e+06	6.50863e+06	4.35079e+06	5.91876e+06	6.14083e+06
980	809.589	832.578	10.8114	0	0	0	0	28558.8	1.65426e+06	1.09816e+06	691078	664165	4.2346e+06	4.49138e+06	3.08058e+06	2.83314e+06	3.07647e+06	2.70728e+06	1.96581e+06	2.34776e+06	2.09861e+06	2.424e+06	2.64552e+06
981	809.589	810.596	11.0213	0	0	0	0	0	0	360249	496879	778907	1.94074e+07	2.00483e+07	1.46881e+07	1.36765e+07	1.37115e+07	1.29408e+07	1.12414e+07	1.36993e+07	1.19784e+07	1.41573e+07	1.5315e+07
982	809.588	810.595	17.1175	0	0	0	0	0	3463.56	40296.2	33986.8	102539	734505	768907	784016	846183	824883	770161	1.26909e+06	859057	948491	1.08803e+06	866913
983	810.592	811.6	10.8143	0	0	0	0	0	0	14955.6	16387.4	254926	7.21913e+06	8.04446e+06	5.89335e+06	5.33657e+06	5.54323e+06	5.06179e+06	4.20492e+06	5.43035e+06	4.23395e+06	5.40983e+06	5.72138e+06
984	810.592	811.6	11.0319	504.912	0	0	0	0	0	19961.7	39608.4	335444	1.02706e+07	1.05386e+07	7.66117e+06	7.04662e+06	7.07479e+06	6.57869e+06	5.8735e+06	7.03608e+06	5.9723e+06	7.08329e+06	7.77612e+06
985	810.593	811.6	17.1194	0	0	0	0	0	580.224	2245.3	5518.08	98499	814297	863930	846693	895069	880891	873831	1.36253e+06	897935	1.06161e+06	1.18578e+06	929030
986	811.606	834.595	10.8131	0	648.552	0	0	1934.38	279720	170021	375747	6.76471e+06	4.76129e+06	3.49849e+06	2.85284e+06	3.0895e+06	3.71326e+06	4.94754e+06	4.36275e+06	2.95902e+06	6.39866e+06	5.64529e+06	8.90356e+06
987	811.606	834.595	11.016	1054.61	962.196	0	0	4460.09	258642	172041	379016	6.22479e+06	4.54243e+06	3.54132e+06	3.16105e+06	3.60146e+06	4.25247e+06	6.22205e+06	5.22458e+06	3.3365e+06	8.91229e+06	6.85821e+06	1.12238e+07
988	816.574	817.581	5.55395	12405.4	9202.44	12126.8	13123.5	10585.5	11239	13669.5	10230.7	22736.1	0	0	0	0	33057.6	101305	0	0	0	448445	56418.9
989	1639.72	820.865	3.62767	2.84869e+06	2.87683e+06	2.88615e+06	2.85284e+06	2.81398e+06	2.83088e+06	2.8472e+06	2.80504e+06	3.31999e+06	2.91048e+06	3.76506e+06	1.95574e+06	1.84874e+06	4.99077e+06	3.26389e+06	2.97161e+06	2.45404e+06	4.06494e+06	4.22753e+06	4.12416e+06
990	1640.72	821.366	3.62729	2.37114e+06	2.4054e+06	2.42826e+06	2.36304e+06	2.32043e+06	2.37564e+06	2.40533e+06	2.3632e+06	2.79617e+06	2.42626e+06	3.13983e+06	1.63156e+06	1.54363e+06	4.15271e+06	2.73749e+06	2.46946e+06	2.02608e+06	3.31032e+06	3.43196e+06	3.41424e+06
991	1641.72	821.868	3.62778	1.12058e+06	1.09202e+06	1.11408e+06	1.0903e+06	1.06696e+06	1.09145e+06	1.12416e+06	1.09537e+06	1.28864e+06	1.13651e+06	1.47885e+06	779704	713221	1.92811e+06	1.28585e+06	1.16785e+06	960349	1.57908e+06	1.63174e+06	1.63059e+06
992	1642.73	822.37	3.62815	398002	389305	386014	382331	383151	386483	377130	374873	450306	409042	505891	267283	259695	675637	450337	409166	325739	543080	566204	562915
993	827.54	828.547	10.11	0	0	0	0	0	7.26803e+06	5.16549e+06	2.93067e+06	1.82195e+06	1.56185e+06	1.3778e+06	1.01608e+06	1.04169e+06	1.69854e+06	927351	968691	730894	804259	953208	930804
994	827.54	828.547	12.0502	3461.79	4164.7	1457.07	25294.2	1.07434e+06	8.75196e+06	4.12619e+06	1.763e+06	2.73099e+06	4.06375e+06	5.11785e+06	4.91014e+06	4.46451e+06	8.0697e+06	6.21361e+06	3.67377e+06	7.78854e+06	6.62526e+06	8.55681e+06	4.36983e+06
995	829.542	830.55	10.8104	1.66723e+06	1.68645e+06	1.56267e+06	1.49456e+06	960292	4.54722e+06	244515	0	0	0	0	0	0	0	0	0	0	0	0	0
996	829.555	830.562	11.0047	0	4883.54	0	4030.37	388649	1.68818e+06	2.94632e+06	2.35982e+06	1.59186e+06	2.02046e+06	2.12901e+06	1.92912e+06	2.23155e+06	2.47718e+06	2.86144e+06	1.39812e+06	1.60553e+06	3.30273e+06	2.53826e+06	3.50905e+06
997	830.559	831.567	11.0179	0	0	3763.66	854.424	326486	521107	1.59458e+06	1.4216e+06	1.09034e+06	1.34193e+06	1.40428e+06	1.2356e+06	1.47442e+06	1.57564e+06	1.75427e+06	962862	1.10769e+06	1.95234e+06	1.59405e+06	2.07723e+06
998	832.575	833.582	10.8036	0	0	568.2	0	3418.69	925724	598628	375568	333636	2.24223e+06	2.39437e+06	1.63733e+06	1.46838e+06	1.6173e+06	1.38693e+06	1.04458e+06	1.25078e+06	1.06189e+06	1.27786e+06	1.3435e+06
999	832.574	833.581	11.0148	0	0	568.2	0	2812.05	950610	576835	364965	312104	2.83659e+06	2.70414e+06	1.87301e+06	1.7185e+06	1.66599e+06	1.75455e+06	1.17624e+06	1.36656e+06	1.40266e+06	1.48372e+06	1.66717e+06
1000	833.59	834.598	17.1208	0	0	0	0	0	14161.2	27381.2	482064	1.16028e+06	1.06524e+06	894487	859486	990538	991731	975406	1.05249e+06	835699	1.15756e+06	945096	970810
1001	834.546	835.553	15.4307	3.1316e+06	2.91789e+06	2.92209e+06	2.94257e+06	2.98581e+06	3.11492e+06	3.29288e+06	3.28185e+06	3.49735e+06	3.45345e+06	3.50064e+06	3.36494e+06	3.38144e+06	3.31697e+06	3.31382e+06	3.24718e+06	3.5197e+06	3.17941e+06	3.09822e+06	3.42211e+06
1002	834.545	835.553	15.5844	2.81794e+06	2.69361e+06	2.69186e+06	2.6939e+06	2.74943e+06	2.86916e+06	3.01805e+06	2.97733e+06	3.21531e+06	3.18598e+06	3.22091e+06	3.08254e+06	3.10617e+06	3.035e+06	3.03743e+06	2.99308e+06	3.25238e+06	2.93651e+06	2.85185e+06	3.15612e+06
1003	834.591	835.599	10.8182	0	0	0	0	0	29258.7	20409.6	151328	3.49536e+06	2.41761e+06	1.76496e+06	1.46658e+06	1.5663e+06	1.91243e+06	2.60015e+06	2.31243e+06	1.53792e+06	3.40057e+06	3.01626e+06	4.72625e+06
1004	847.528	848.536	17.0821	0	0	0	0	0	0	5047.67	1.06747e+06	1.30586e+06	1.36393e+06	1.282e+06	1.23889e+06	1.25616e+06	1.23971e+06	1.25003e+06	1.28917e+06	1.28537e+06	1.13061e+06	1.47006e+06	1.16473e+06
1005	855.571	856.578	10.805	582.96	3349.56	1202.57	5044.12	1418.69	12029.6	4365.55	28890.1	1.2321e+06	925204	647610	474277	446374	544881	727819	541615	353664	1.06329e+06	831435	1.4412e+06
1006	855.571	856.578	11.0192	582.96	1914.7	2702.42	11208.3	2686.13	24378.8	16299.7	31198	1.45161e+06	1.23115e+06	885659	713784	759600	752139	1.34905e+06	1.00711e+06	601567	1.93534e+06	1.41278e+06	2.40914e+06
1007	855.572	856.579	12.0518	1732.88	6566.79	7106.06	5402.51	4429.83	15454	88914.1	175663	1.48358e+06	1.48658e+06	2.04407e+06	1.94474e+06	1.94818e+06	2.13378e+06	2.47498e+06	2.4836e+06	1.57838e+06	3.17369e+06	2.43158e+06	3.38544e+06
1008	990.662	991.669	8.16709	1.62338e+06	1.54362e+06	1.55221e+06	1.85747e+06	1.83279e+06	1.60225e+06	1.56924e+06	1.70661e+06	454087	1.96689e+06	802851	1.94514e+06	1.33821e+06	720855	1.26678e+06	875577	932637	2.52701e+06	728980	1.22021e+06

## Sheet: Serum ESI-
CompID	CompMW	MZ	Time	II_serum_qc1	II_serum_qc2	II_serum_qc3	II_serum_qc4	II_serum_qc5	II_serum_qc6	II_serum_qc7	II_serum_qc8	II_HFD_1	II_HFD_2	II_HFD_3	II_HFD_4	II_HFD_5	II_HFD_6	II_LFD_1	II_LFD_2	II_LFD_3	II_LFD_4	II_LFD_5	II_LFD_6
1	74.0369	73.0297	1.3041	452112	448195	455991	452066	446151	447265	455818	445260	292951	481622	505873	401475	555408	392050	369122	382481	302671	548926	300239	388970
2	79.9665	78.9592	1.0332	1.64977e+06	1.61515e+06	1.66068e+06	1.66052e+06	1.66402e+06	1.68087e+06	1.66848e+06	1.68533e+06	2.74039e+06	1.68938e+06	2.20596e+06	1.38425e+06	2.69384e+06	1.06565e+06	2.17553e+06	1.43683e+06	2.16165e+06	2.27964e+06	1.8535e+06	2.37987e+06
3	80.9649	79.9576	0.868955	250324	257704	253783	257363	259126	247023	246194	249017	317204	228735	244837	221323	259543	218259	247977	268490	281879	291521	273332	260885
4	88.0162	133.014	0.965632	4.29416e+06	4.28432e+06	4.26652e+06	4.28827e+06	4.24513e+06	4.25767e+06	4.30241e+06	4.31617e+06	7.11004e+06	3.82503e+06	5.10782e+06	2.30158e+06	4.35177e+06	2.45456e+06	3.86503e+06	3.50832e+06	3.27677e+06	5.25395e+06	2.85748e+06	3.56432e+06
5	88.0163	133.014	1.02178	4.3167e+06	4.30173e+06	4.28447e+06	4.30613e+06	4.26318e+06	4.27476e+06	4.3239e+06	4.33231e+06	7.13563e+06	3.84334e+06	5.13415e+06	2.31472e+06	4.37264e+06	2.46715e+06	3.8821e+06	3.52492e+06	3.29156e+06	5.27269e+06	2.87173e+06	3.5754e+06
6	90.0318	89.0245	1.00239	4.73773e+07	4.74657e+07	4.75768e+07	4.77429e+07	4.75195e+07	4.73567e+07	4.7623e+07	4.77487e+07	5.05281e+07	4.60858e+07	5.26399e+07	5.29371e+07	5.31967e+07	5.1062e+07	4.6404e+07	3.66858e+07	3.47394e+07	5.33167e+07	3.31111e+07	4.27797e+07
7	90.0317	89.0245	1.08736	4.84335e+07	4.86062e+07	4.8683e+07	4.88201e+07	4.85994e+07	4.84399e+07	4.87145e+07	4.88263e+07	5.19529e+07	4.72629e+07	5.41667e+07	5.4402e+07	5.47937e+07	5.24713e+07	4.74964e+07	3.73176e+07	3.5294e+07	5.48344e+07	3.37194e+07	4.37461e+07
8	90.0317	89.0245	1.20955	5.14872e+07	5.18086e+07	5.19181e+07	5.21355e+07	5.19424e+07	5.17158e+07	5.2034e+07	5.21651e+07	5.47582e+07	4.98481e+07	5.76494e+07	5.78058e+07	5.85028e+07	5.58787e+07	5.03441e+07	3.9315e+07	3.71381e+07	5.8418e+07	3.55595e+07	4.62975e+07
9	90.0318	89.0245	1.24536	5.05126e+07	5.07232e+07	5.07697e+07	5.09802e+07	5.07953e+07	5.0508e+07	5.08499e+07	5.09813e+07	5.41642e+07	4.92141e+07	5.67869e+07	5.68964e+07	5.7484e+07	5.48896e+07	4.94901e+07	3.85871e+07	3.65078e+07	5.74745e+07	3.48864e+07	4.55044e+07
10	93.9355	92.9282	0.865448	5.57216e+06	5.54002e+06	5.46352e+06	5.46098e+06	5.54963e+06	5.50143e+06	5.51235e+06	5.52724e+06	5.13782e+06	5.34573e+06	5.2336e+06	5.51415e+06	4.61706e+06	5.52671e+06	5.33552e+06	5.72904e+06	5.61032e+06	4.35138e+06	5.70862e+06	5.45057e+06
11	94.042	93.0347	3.47835	1.69424e+06	1.70404e+06	1.70529e+06	1.6899e+06	1.68494e+06	1.66906e+06	1.71368e+06	1.72292e+06	2.18484e+06	1.68378e+06	977086	828928	807493	1.11528e+06	550124	3.3627e+06	3.03963e+06	1.07601e+06	885942	1.13069e+06
12	95.9325	94.9252	0.864461	3.56952e+06	3.57116e+06	3.54016e+06	3.51347e+06	3.55488e+06	3.5171e+06	3.5475e+06	3.58077e+06	3.3793e+06	3.45449e+06	3.40022e+06	3.54222e+06	3.00305e+06	3.54177e+06	3.41762e+06	3.68089e+06	3.59862e+06	2.81998e+06	3.65514e+06	3.50436e+06
13	97.9675	96.9602	0.826746	1.48417e+07	1.44828e+07	1.4929e+07	1.51176e+07	1.49213e+07	1.51671e+07	1.48369e+07	1.49157e+07	1.51767e+07	1.27678e+07	1.37561e+07	1.62478e+07	1.5282e+07	1.44055e+07	1.56988e+07	1.69484e+07	1.64648e+07	1.79488e+07	1.75379e+07	1.63056e+07
14	97.9675	96.9603	0.934655	1.75377e+07	1.73363e+07	1.78088e+07	1.79654e+07	1.77727e+07	1.77602e+07	1.74835e+07	1.78257e+07	1.81155e+07	1.53143e+07	1.63847e+07	1.95065e+07	1.82319e+07	1.72765e+07	1.88044e+07	2.04243e+07	1.94362e+07	2.12118e+07	2.08042e+07	1.96297e+07
15	97.9674	96.9602	1.08998	2.57456e+07	2.53238e+07	2.60146e+07	2.62068e+07	2.60112e+07	2.59995e+07	2.58429e+07	2.61014e+07	2.71675e+07	2.26089e+07	2.45014e+07	2.92932e+07	2.7232e+07	2.54653e+07	2.77407e+07	3.05463e+07	2.92839e+07	3.07337e+07	3.13136e+07	2.91696e+07
16	97.9675	96.9602	1.41434	3.86171e+07	3.80309e+07	3.88613e+07	3.93171e+07	3.91585e+07	3.89639e+07	3.90221e+07	3.93744e+07	4.10158e+07	3.45702e+07	3.78664e+07	4.45864e+07	4.17777e+07	3.87119e+07	4.20928e+07	4.55183e+07	4.40168e+07	4.58122e+07	4.63114e+07	4.42594e+07
17	97.9769	96.9696	1.10822	1.39934e+06	1.38117e+06	1.41008e+06	1.43959e+06	1.42987e+06	1.42912e+06	1.40605e+06	1.44366e+06	2.48525e+06	1.52508e+06	1.8721e+06	1.24908e+06	2.38115e+06	897812	2.00336e+06	1.32357e+06	1.92651e+06	2.03137e+06	1.72262e+06	2.22247e+06
18	102.032	101.025	0.864619	119268	117589	118271	119709	119333	119973	116856	116785	120876	114219	151048	117015	140286	98459.3	85758	104090	124253	116539	96959.5	93725.3
19	103.964	102.957	0.84113	1.38525e+06	1.37583e+06	1.37705e+06	1.3725e+06	1.39357e+06	1.37549e+06	1.3771e+06	1.39393e+06	1.20611e+06	1.29569e+06	1.35792e+06	1.37572e+06	1.27407e+06	1.33725e+06	1.40958e+06	1.32501e+06	1.30906e+06	1.3604e+06	1.37689e+06	1.43369e+06
20	103.964	102.957	17.0924	257150	249445	255236	250265	241883	243101	221358	234508	347387	343258	343551	330334	333321	296540	265011	263245	266388	231797	239951	233615
21	104.047	103.04	1.30783	1.42833e+07	1.44232e+07	1.43065e+07	1.43302e+07	1.4583e+07	1.44967e+07	1.4592e+07	1.45136e+07	5.16645e+06	1.31499e+07	9.87365e+06	1.46079e+07	1.26324e+07	1.19877e+07	2.01565e+07	1.2686e+07	1.10783e+07	1.43366e+07	1.35031e+07	1.83605e+07
22	104.047	103.04	1.36726	1.30821e+07	1.32391e+07	1.29454e+07	1.31483e+07	1.33925e+07	1.31725e+07	1.32275e+07	1.33113e+07	4.67535e+06	1.19702e+07	8.93085e+06	1.30377e+07	1.15488e+07	1.10506e+07	1.86438e+07	1.11106e+07	9.91653e+06	1.29551e+07	1.22842e+07	1.70199e+07
23	104.047	103.04	1.46173	1.66643e+07	1.6675e+07	1.68153e+07	1.67776e+07	1.69019e+07	1.67407e+07	1.71368e+07	1.70988e+07	6.02088e+06	1.54103e+07	1.17301e+07	1.79612e+07	1.49528e+07	1.36343e+07	2.29424e+07	1.56737e+07	1.30774e+07	1.71154e+07	1.5563e+07	2.11097e+07
24	104.047	103.04	1.50842	1.719e+07	1.7229e+07	1.73712e+07	1.73479e+07	1.74818e+07	1.73445e+07	1.77252e+07	1.77034e+07	6.17778e+06	1.58702e+07	1.20946e+07	1.85216e+07	1.54985e+07	1.41042e+07	2.37995e+07	1.60648e+07	1.34252e+07	1.77003e+07	1.60187e+07	2.18383e+07
25	104.047	103.04	1.58941	1.55278e+07	1.52399e+07	1.57725e+07	1.55201e+07	1.54446e+07	1.5419e+07	1.59754e+07	1.58244e+07	5.74072e+06	1.4279e+07	1.10171e+07	1.67957e+07	1.38945e+07	1.24513e+07	2.06093e+07	1.48086e+07	1.21631e+07	1.60099e+07	1.44254e+07	1.90245e+07
26	105.961	104.954	0.840644	482206	479465	465605	461513	475778	473681	473928	469766	418374	454087	464408	471134	441450	462147	484429	455703	448824	463039	470431	478176
27	106.029	279.039	0.903302	204405	204695	201289	195256	198291	198948	193397	200578	63385	208353	144253	49456.9	513473	59603	178492	40712.9	16755.6	197649	95981.7	221854
28	108.058	107.05	3.89957	392411	390712	383972	384717	389450	396065	397094	396804	516391	290031	98140.1	205314	96163.7	299020	252945	989023	654716	275300	373285	135492
29	112.016	111.009	1.21763	176338	172286	185119	174116	173513	178173	171710	179606	357572	179619	210051	128405	238257	117827	223756	168724	217583	226355	183851	225273
30	113.993	112.986	0.815086	5.83727e+06	5.66209e+06	5.67066e+06	5.76778e+06	5.72942e+06	5.8185e+06	5.81198e+06	5.76928e+06	5.51591e+06	5.65092e+06	5.54556e+06	5.58174e+06	5.62619e+06	5.70322e+06	5.69859e+06	5.76746e+06	5.77641e+06	5.4955e+06	5.89098e+06	5.66061e+06
31	113.993	112.986	4.38898	4.62627e+06	4.74064e+06	4.84553e+06	4.83848e+06	4.86737e+06	4.96264e+06	4.91244e+06	4.96097e+06	4.47548e+06	9.80016e+06	4.64904e+06	1.0587e+07	1.00691e+07	2.16472e+06	4.28991e+06	1.0157e+07	9.84156e+06	1.00304e+07	3.00671e+06	4.63822e+06
32	113.994	112.986	7.49229	3.59926e+06	3.52216e+06	3.51869e+06	3.53962e+06	3.54944e+06	3.49182e+06	3.47834e+06	3.49645e+06	3.84363e+06	4.45601e+06	3.44355e+06	4.2088e+06	4.56759e+06	3.26087e+06	3.43325e+06	4.43339e+06	4.4712e+06	3.76915e+06	3.17629e+06	2.91306e+06
33	113.993	112.985	7.59775	4.45264e+06	4.34332e+06	4.49322e+06	4.43998e+06	4.44768e+06	4.42625e+06	4.43402e+06	4.47229e+06	4.72666e+06	5.4804e+06	4.25167e+06	5.45184e+06	5.68341e+06	4.14906e+06	4.31141e+06	5.61664e+06	5.56203e+06	4.92792e+06	4.21756e+06	3.93822e+06
34	113.995	112.987	8.18093	664024	714475	880214	758587	794011	819697	902861	880206	1.10295e+06	1.20436e+06	964112	1.21478e+06	1.00173e+06	841662	837680	694651	848448	1.07301e+06	701393	781098
35	113.995	112.987	9.72593	323130	347960	385502	377478	374365	368843	335694	322228	607166	856521	873458	1.01752e+06	914817	286866	346590	310928	319347	516805	238047	250988
36	113.993	112.986	17.1103	8.91612e+06	8.73824e+06	8.8612e+06	8.72955e+06	8.66293e+06	8.5992e+06	8.30476e+06	8.40996e+06	1.08029e+07	1.05462e+07	1.04155e+07	1.03219e+07	1.02562e+07	9.5715e+06	9.1069e+06	9.14177e+06	9.19518e+06	8.51504e+06	8.68391e+06	8.57853e+06
37	113.993	112.985	17.9344	1.02461e+06	1.0163e+06	1.03666e+06	1.02703e+06	1.03581e+06	1.05705e+06	1.0569e+06	1.05167e+06	1.00538e+06	991355	1.00602e+06	995994	966461	999989	1.01272e+06	1.02095e+06	990333	995372	1.01832e+06	1.00983e+06
38	114.032	113.025	0.86112	255285	247288	243637	242992	234026	243380	236131	236503	254298	253086	342179	271061	332042	242462	179731	114210	137378	267550	154883	171073
39	116.011	115.004	1.25522	279758	266098	283028	280251	264676	267631	266029	271183	675216	254307	402483	174272	308163	204855	266942	205889	200954	323524	182147	217562
40	116.047	115.04	1.95665	676069	667512	667085	653704	677728	678501	672563	671727	611790	619664	408394	383233	266742	326011	459801	1.17926e+06	1.13331e+06	378709	781587	501387
41	117.058	116.051	3.37662	900102	926930	911580	915320	910110	908850	902213	891667	986605	956544	995418	873744	912844	823642	898368	1.03234e+06	1.06471e+06	986877	944252	838698
42	117.936	116.929	10.8114	1.89832e+06	1.89985e+06	1.82038e+06	1.79532e+06	1.85404e+06	1.78854e+06	1.75941e+06	1.68099e+06	2.53624e+06	2.7824e+06	2.73975e+06	2.7336e+06	2.70936e+06	2.63158e+06	2.2396e+06	1.81073e+06	1.76366e+06	1.86039e+06	1.65052e+06	1.85289e+06
43	117.936	116.929	11.0205	2.03691e+06	2.0123e+06	1.89132e+06	1.88296e+06	1.98693e+06	1.90129e+06	1.83042e+06	1.73874e+06	2.53321e+06	2.87567e+06	2.86772e+06	2.8189e+06	2.80616e+06	2.57576e+06	2.4856e+06	1.91131e+06	1.7848e+06	2.0296e+06	1.71276e+06	1.93216e+06
44	117.936	116.929	12.0516	5.78496e+06	5.94982e+06	5.75775e+06	5.8531e+06	6.17355e+06	5.42425e+06	5.02182e+06	4.71449e+06	9.73125e+06	1.00034e+07	1.01849e+07	1.00635e+07	9.77725e+06	9.19065e+06	6.13884e+06	5.65063e+06	5.59162e+06	5.41092e+06	5.18446e+06	5.41648e+06
45	118.027	117.019	1.30639	1.83589e+07	1.78689e+07	1.80262e+07	1.80598e+07	1.78072e+07	1.77605e+07	1.82113e+07	1.78205e+07	1.05531e+07	1.9648e+07	2.2091e+07	1.7071e+07	2.5596e+07	1.68174e+07	1.51638e+07	7.53283e+06	5.63043e+06	2.31211e+07	7.95169e+06	1.45664e+07
46	118.063	117.056	1.99207	295139	315350	305923	304167	307940	319706	299853	310649	245216	275351	162865	220813	218112	171160	253066	702548	493748	278239	409587	323652
47	118.063	117.056	3.22779	4.73845e+06	4.81607e+06	4.74477e+06	4.6905e+06	4.75802e+06	4.79428e+06	4.82309e+06	4.8725e+06	2.65166e+06	3.77389e+06	5.37929e+06	3.42083e+06	2.73873e+06	2.87974e+06	4.44044e+06	9.96004e+06	9.2525e+06	4.1896e+06	5.40282e+06	3.9157e+06
48	118.063	117.056	3.28393	4.67428e+06	4.75534e+06	4.67145e+06	4.61812e+06	4.69333e+06	4.72832e+06	4.73887e+06	4.79579e+06	2.61158e+06	3.72424e+06	5.30897e+06	3.3667e+06	2.69117e+06	2.83508e+06	4.37528e+06	9.83462e+06	9.13161e+06	4.11689e+06	5.31977e+06	3.85069e+06
49	119.012	118.005	17.0511	1.95008e+06	1.86639e+06	1.91513e+06	1.91115e+06	1.89827e+06	1.84881e+06	1.80762e+06	1.8434e+06	1.97447e+06	1.93047e+06	1.97321e+06	1.95542e+06	1.95757e+06	1.97057e+06	1.84946e+06	1.88449e+06	1.88984e+06	1.79789e+06	1.84622e+06	1.82463e+06
50	119.058	118.051	0.871361	168031	165514	170338	171401	164421	168937	174924	171562	138241	128409	143516	118662	125723	112628	152660	326896	308165	192903	144546	146996
51	120.042	119.035	0.910968	230558	235037	227728	231374	224797	223266	232530	233675	181025	187841	210663	212665	196812	199300	224504	304095	347756	215398	317446	253330
52	120.058	119.05	4.10748	163421	170053	175480	169606	177279	179228	181188	182452	161201	242611	59636.1	75640.4	252852	34319.9	72233	623328	1.03126e+06	272669	57419.2	37889.7
53	122.037	121.03	3.8548	239784	248385	248052	277810	256209	253980	284498	274651	93564.4	92607	78550.6	93460.5	81639.8	110816	62840.5	114352	110565	83274.5	96213.4	81887.3
54	125.015	124.008	0.870896	1.64079e+06	1.60241e+06	1.60748e+06	1.60674e+06	1.61488e+06	1.64792e+06	1.5919e+06	1.63942e+06	2.11231e+06	1.49693e+06	1.5661e+06	1.3343e+06	1.60206e+06	1.33786e+06	1.45687e+06	1.70819e+06	1.92328e+06	1.72623e+06	1.8728e+06	1.63811e+06
55	125.015	124.008	0.938727	2.09172e+06	2.03733e+06	2.03942e+06	2.03636e+06	2.05248e+06	2.05946e+06	2.02791e+06	2.07601e+06	2.63702e+06	1.94224e+06	1.96884e+06	1.70151e+06	2.02694e+06	1.74496e+06	1.81974e+06	2.11214e+06	2.35889e+06	2.13294e+06	2.33484e+06	2.01045e+06
56	126.007	124.999	16.4401	2.34065e+06	2.35336e+06	2.32545e+06	2.32992e+06	2.34741e+06	2.35674e+06	2.34263e+06	2.34584e+06	2.06994e+06	1.68114e+06	1.99037e+06	1.84218e+06	1.74575e+06	2.38463e+06	2.41838e+06	2.36236e+06	2.40893e+06	2.13225e+06	2.35587e+06	2.35353e+06
57	129.043	128.036	1.21798	638254	637739	660667	672985	664893	669345	661889	690026	469901	370293	429348	350712	423910	444618	587492	575291	545521	397000	689350	574869
58	130.063	129.056	3.6032	2.75318e+06	2.70346e+06	2.69926e+06	2.64552e+06	2.69826e+06	2.66913e+06	2.71917e+06	2.73721e+06	2.85172e+06	2.47128e+06	1.99863e+06	1.74305e+06	1.46437e+06	1.07383e+06	1.77095e+06	4.36834e+06	5.2719e+06	1.81626e+06	2.6278e+06	1.6299e+06
59	130.063	129.056	3.7601	1.95959e+06	1.89305e+06	1.96432e+06	1.99882e+06	2.02461e+06	1.87204e+06	1.91517e+06	1.98445e+06	2.0316e+06	1.62044e+06	1.39521e+06	1.24734e+06	1.02545e+06	811334	1.22843e+06	3.47561e+06	4.13432e+06	1.22471e+06	1.97053e+06	1.08905e+06
60	131.095	130.087	1.4428	473822	488206	495316	498235	510068	501024	495686	506257	506380	419953	425817	408041	332458	332828	326421	1.53845e+06	1.61179e+06	434061	488087	396605
61	132.042	131.035	1.63086	896185	880273	863839	861097	868265	881276	862765	852555	318961	1.2903e+06	698496	925506	839612	694345	541686	1.26069e+06	546045	1.22919e+06	321165	426811
62	132.042	131.035	1.70935	852377	834709	831004	820292	822690	834581	826476	818942	283314	1.24877e+06	647473	840903	796353	598589	495732	1.23499e+06	518199	1.13987e+06	288959	381496
63	132.079	131.072	3.72933	1.20949e+06	1.1858e+06	1.2014e+06	1.19491e+06	1.22584e+06	1.22481e+06	1.23578e+06	1.23104e+06	751014	1.05062e+06	925334	993583	674874	653544	1.25919e+06	2.39623e+06	2.20488e+06	1.07025e+06	1.30601e+06	1.22832e+06
64	132.079	131.071	3.85839	1.19451e+06	1.16585e+06	1.18097e+06	1.1755e+06	1.20865e+06	1.20367e+06	1.2137e+06	1.20844e+06	737579	1.0346e+06	913001	972024	657771	645885	1.22753e+06	2.3823e+06	2.19064e+06	1.04129e+06	1.29676e+06	1.20994e+06
65	132.09	131.083	0.8535	99679.8	99897.1	101386	98665.1	95992.8	102219	101302	101253	92262.4	60846.8	68756.7	58219.4	53751.3	61964.7	77857.8	330653	283201	81770.4	146421	98658.9
66	133.875	132.868	17.2748	3.61468e+06	3.66786e+06	3.66411e+06	3.59423e+06	3.64785e+06	3.6281e+06	3.54402e+06	3.55912e+06	3.54929e+06	3.53111e+06	3.57924e+06	3.61275e+06	3.56819e+06	3.67941e+06	3.63474e+06	3.70903e+06	3.72275e+06	3.61338e+06	3.64299e+06	3.63412e+06
67	133.875	132.868	17.3737	3.56095e+06	3.60096e+06	3.60671e+06	3.5548e+06	3.59145e+06	3.58558e+06	3.5004e+06	3.53277e+06	3.52242e+06	3.49563e+06	3.53927e+06	3.57568e+06	3.52932e+06	3.62841e+06	3.59975e+06	3.67397e+06	3.6741e+06	3.59038e+06	3.62755e+06	3.60871e+06
68	134.022	133.014	1.00542	4.37219e+06	4.35247e+06	4.3348e+06	4.34978e+06	4.31569e+06	4.32714e+06	4.37818e+06	4.38592e+06	7.23982e+06	3.89674e+06	5.2109e+06	2.3536e+06	4.44229e+06	2.50099e+06	3.92962e+06	3.58508e+06	3.34314e+06	5.3477e+06	2.91099e+06	3.62166e+06
69	135.014	134.007	4.88238	158023	154998	151220	150461	153277	153687	160866	152336	205339	114720	280514	184449	334530	144632	133442	80111.7	88460.4	171537	148766	164966
70	135.873	134.865	17.2522	1.96442e+06	1.98904e+06	1.99356e+06	1.94569e+06	1.97527e+06	1.96078e+06	1.92619e+06	1.9304e+06	1.89978e+06	1.89686e+06	1.92536e+06	1.95305e+06	1.91794e+06	1.9844e+06	1.97284e+06	2.02453e+06	2.04674e+06	1.95873e+06	1.98197e+06	1.94623e+06
71	136.037	135.03	0.892087	579714	593375	586236	575562	590584	583564	584685	589072	386379	410489	332564	282171	350978	450078	370582	442986	507586	498410	528103	569573
72	136.052	181.051	3.36613	775762	778342	787440	769992	778280	769930	784847	782187	1.1722e+06	687660	673386	668147	778319	510155	517938	2.01475e+06	1.69529e+06	739512	576287	476193
73	137.871	136.863	17.2367	731423	735307	726251	719959	724316	734005	709914	718521	712352	702964	714901	716659	709028	731555	729120	752496	754662	730401	725043	717713
74	138.043	137.036	0.905705	14463.8	12800.7	13905.9	12255.5	13801.1	14556.1	15686.2	15084.3	366.624	1908.53	446.121	6368.01	347.598	3579.19	4131.14	209117	116986	1806.12	5708.37	12778.6
75	139.063	138.056	3.56002	184812	192662	184720	187865	193943	197792	201996	201931	47095.6	24230.8	50060.9	9860.24	27993.7	48479.7	23638	23510.3	24404.8	25896.7	60466.2	61847.1
76	143.074	142.066	3.36492	173655	181855	174573	172307	171955	174473	174114	175526	203740	190608	181799	150944	170601	134373	152366	233517	253528	197474	179895	139065
77	144.042	179.056	0.864069	807755	800028	800731	777767	763513	781777	767284	763445	800960	792685	1.04402e+06	826633	983728	789363	567006	388212	467385	808042	496032	569662
78	145.053	144.046	3.86079	77656.7	77788.5	74699.4	77452.1	73399	75881.5	75120.6	75861	95438	50708.8	51950.7	30081.8	42866.2	36035.3	41551.1	108260	133602	53140.6	75384.5	53960.9
79	145.074	144.067	2.12443	1.37559e+06	1.34772e+06	1.35376e+06	1.33195e+06	1.31391e+06	1.328e+06	1.31549e+06	1.3288e+06	890545	1.64767e+06	1.62117e+06	1.24767e+06	2.86201e+06	881546	1.30316e+06	162857	125248	2.6004e+06	444750	1.41949e+06
80	146.022	191.02	0.918648	1.21218e+06	1.22316e+06	1.20245e+06	1.21939e+06	1.20759e+06	1.21349e+06	1.19956e+06	1.21332e+06	2.10262e+06	973134	1.02296e+06	701635	1.36355e+06	773003	1.56363e+06	1.24244e+06	1.69758e+06	1.47441e+06	1.64898e+06	1.98714e+06
81	146.069	145.062	0.871492	515672	516334	519093	531525	527793	528025	524829	534950	473698	433493	464367	411333	500551	444067	619418	739220	681200	484681	478353	564466
82	146.106	145.098	0.778212	281901	285646	288502	281564	286932	285008	289381	289374	292043	167237	219679	198099	184652	154370	223668	1.05624e+06	878633	263011	325103	211707
83	147.946	146.939	17.2245	884147	918640	917819	927453	916121	929273	935802	947366	1.11216e+06	1.11555e+06	1.13482e+06	1.14286e+06	1.1117e+06	1.10889e+06	1.11412e+06	1.11662e+06	1.0973e+06	1.06781e+06	1.06687e+06	1.04576e+06
84	147.969	146.961	17.1725	251252	249263	256179	247945	245342	252899	248083	261986	293421	283328	279818	276916	278916	267165	261296	259125	264599	248388	240954	249330
85	147.99	146.983	0.953139	655949	696611	674815	666894	691165	680783	669848	684294	627270	682305	661108	739084	545679	783128	715491	530112	488602	614463	518474	654579
86	151.002	149.995	17.0536	7.19163e+06	6.85692e+06	6.96258e+06	6.97054e+06	6.9258e+06	6.90981e+06	6.76585e+06	6.92315e+06	6.44419e+06	6.37942e+06	6.50435e+06	6.54861e+06	6.55323e+06	6.95094e+06	6.77203e+06	6.86358e+06	6.87896e+06	6.71322e+06	6.92838e+06	6.73152e+06
87	151.002	149.995	17.5206	8.33108e+06	8.13601e+06	8.23779e+06	8.28851e+06	8.19903e+06	8.21424e+06	8.03984e+06	8.20016e+06	7.77619e+06	7.62702e+06	7.84147e+06	7.882e+06	7.83635e+06	8.27253e+06	8.09591e+06	8.08052e+06	8.15727e+06	8.0715e+06	8.17828e+06	8.02294e+06
88	151.894	150.887	0.88382	961048	963912	971057	952979	965833	955328	971731	970202	936335	976254	878899	983874	752065	1.00528e+06	906033	1.0287e+06	1.01853e+06	692806	1.02045e+06	924715
89	152.022	151.015	17.0737	245402	235724	243537	237258	228019	230718	218070	227983	1.91589e+06	1.78152e+06	1.75574e+06	1.69624e+06	1.62673e+06	1.7025e+06	1.58135e+06	1.52342e+06	1.45901e+06	1.38121e+06	1.40832e+06	1.33832e+06
90	153.891	152.884	0.883061	977461	991725	981232	971049	991372	974020	991869	988406	947236	977103	901470	1.00269e+06	762327	1.02577e+06	932087	1.04779e+06	1.03783e+06	691409	1.0552e+06	923065
91	155.07	154.062	0.860552	292889	294380	294663	289536	290518	298513	298414	299571	297598	238590	229353	289499	240395	265245	266586	436970	532977	248477	226810	298598
92	155.926	154.919	1.0137	651747	655185	641668	647442	643848	657833	653571	657971	595527	564237	530732	675126	508952	650354	613222	871692	824186	540716	806985	630183
93	155.936	154.928	0.985907	360075	370889	352992	360646	364366	360902	351687	365842	649452	355560	456600	268661	569867	174929	458444	296363	483683	420830	410817	524760
94	158.044	157.037	0.897152	402327	409378	407016	405517	402272	401680	411324	405560	501236	326907	288341	251994	277023	332419	323823	473615	666303	302164	761328	394037
95	159.068	204.066	4.04269	794597	794601	794964	781133	805342	824568	818139	827797	472668	733762	491544	703865	746385	247981	647053	2.59126e+06	2.20761e+06	774382	796587	571365
96	159.09	158.082	3.54189	907342	906491	904558	897794	892082	884327	896260	885854	1.10788e+06	1.14949e+06	867300	653882	1.74465e+06	412988	765940	241802	251460	1.42303e+06	364140	831925
97	159.09	158.082	3.6485	755265	740566	770337	775968	762994	749456	758130	748808	939299	976342	738692	534448	1.53241e+06	335677	611624	199475	213011	1.22558e+06	301288	675727
98	159.126	158.119	4.65871	195915	190474	187890	188811	193232	194145	194055	188532	195266	378610	213802	348805	295959	98886.1	74408.6	112404	144065	269292	112750	167731
99	159.986	158.979	0.757648	568038	566231	548079	581047	540214	554348	547251	537007	1.00715e+06	655570	816436	736656	769575	531963	725811	310187	530171	703067	336049	428728
100	159.986	158.979	17.1539	227384	220751	220338	224185	222960	226204	220153	225875	271796	267256	269048	250630	256401	238739	229655	237732	239755	224936	225489	218459
101	160.074	159.066	3.68014	106413	107259	101861	104184	105434	98979.3	109274	98922.5	52587.9	180911	100556	142887	117029	67998.2	55688.6	32080.7	25802.2	95478.8	61989	98589.9
102	160.11	159.103	4.50219	31621.8	29541.9	27881.3	30968.1	30911	35570.3	33954.1	36331.5	14562.8	117107	24385.3	125409	111124	10412.3	52841.4	95953.2	119096	157037	22984.9	49808.1
103	160.11	159.103	4.80824	113796	112649	110291	106307	110055	112951	110273	111536	97010.1	167334	110514	165319	114957	79446.8	78632.4	58732	67399.6	138007	101156	97601.7
104	161.849	160.842	1.3973	1.16337e+06	1.12412e+06	1.05015e+06	1.13436e+06	1.09216e+06	1.07686e+06	1.09337e+06	1.09813e+06	1.39461e+06	1.40432e+06	1.297e+06	1.79903e+06	1.15879e+06	1.40988e+06	1.34684e+06	2.36408e+06	2.00954e+06	1.17955e+06	1.65816e+06	1.25649e+06
105	161.849	160.842	17.2706	1.20076e+06	1.17053e+06	1.1887e+06	1.18846e+06	1.23986e+06	1.23762e+06	1.27751e+06	1.2672e+06	1.19843e+06	1.28075e+06	1.26955e+06	1.36561e+06	1.34109e+06	1.40499e+06	1.45577e+06	1.47435e+06	1.44271e+06	1.50051e+06	1.44664e+06	1.39477e+06
106	162.053	179.056	0.865434	807755	802713	803244	780258	766229	781777	770173	766052	804447	795404	1.04818e+06	829605	988856	791872	568862	389149	468386	810243	496032	571420
107	162.053	161.046	1.38434	695262	707988	724216	741421	739085	717880	747709	725754	445566	664484	608649	729939	770062	498045	681314	461143	419357	741699	525375	800260
108	163.846	162.839	0.999324	551578	565391	541631	579822	551117	562715	552216	562517	474932	691898	503650	726102	389883	874945	604473	1.14212e+06	897564	392733	816000	552356
109	163.846	162.839	1.3949	1.25097e+06	1.22774e+06	1.19026e+06	1.26011e+06	1.23586e+06	1.20146e+06	1.22107e+06	1.23949e+06	1.52306e+06	1.56465e+06	1.41631e+06	1.96258e+06	1.29084e+06	1.58557e+06	1.52374e+06	2.55312e+06	2.16003e+06	1.31042e+06	1.84739e+06	1.42889e+06
110	163.846	162.839	17.2705	1.1509e+06	1.12764e+06	1.1663e+06	1.14166e+06	1.17443e+06	1.19186e+06	1.21003e+06	1.22487e+06	1.15498e+06	1.21146e+06	1.19823e+06	1.2976e+06	1.29509e+06	1.32976e+06	1.39339e+06	1.38706e+06	1.37152e+06	1.42839e+06	1.3776e+06	1.33746e+06
111	165.079	164.072	2.01265	4.59811e+06	4.5327e+06	4.51765e+06	4.47874e+06	4.50409e+06	4.44325e+06	4.50852e+06	4.50061e+06	4.57021e+06	4.12896e+06	4.67479e+06	4.57187e+06	3.89499e+06	3.88783e+06	3.82852e+06	5.93066e+06	6.22906e+06	4.4832e+06	3.89152e+06	3.87578e+06
112	165.843	164.836	17.2709	346236	338097	345327	337414	346288	359086	382304	374010	348404	372688	362758	388759	401456	405288	422776	420239	409772	422423	418375	399326
113	166.027	165.019	3.72918	136577	270068	161204	467736	210902	146062	340930	185857	284948	164644	143814	212398	138273	633400	149562	354603	169985	164591	341181	209128
114	166.063	165.056	4.00838	98819.3	99198.1	101194	97980.6	103628	100713	103151	96470.1	98082.7	107120	64796	87970.7	79841	39397.2	61030.9	196983	206660	83312.4	80148.2	65825
115	167.025	166.018	0.905327	204276	201607	206537	204576	207945	200284	202652	200340	118767	244071	129160	152110	212296	132964	114811	56721	72500.7	160623	117931	168778
116	168.029	167.021	0.912407	5.02349e+06	5.05383e+06	4.95736e+06	4.89699e+06	4.93936e+06	4.99066e+06	4.64737e+06	4.75402e+06	4.73306e+06	6.76908e+06	7.88463e+06	6.55097e+06	7.96823e+06	5.93226e+06	5.9096e+06	5.55452e+06	4.33085e+06	8.47006e+06	2.7497e+06	5.53703e+06
117	168.029	167.021	1.02527	8.43243e+06	8.38727e+06	8.28476e+06	8.19161e+06	8.13394e+06	8.1737e+06	7.97961e+06	7.96953e+06	7.4692e+06	1.14242e+07	1.30929e+07	1.10306e+07	1.32961e+07	1.00196e+07	9.72684e+06	9.15491e+06	7.09847e+06	1.37345e+07	4.38113e+06	8.85221e+06
118	168.029	167.021	1.2139	3.71189e+06	3.5156e+06	3.6242e+06	3.47204e+06	3.36812e+06	3.47337e+06	3.49303e+06	3.38666e+06	2.91925e+06	4.92985e+06	5.5196e+06	4.71822e+06	5.62927e+06	4.3063e+06	4.03099e+06	3.79542e+06	2.92189e+06	5.8123e+06	1.77478e+06	3.50518e+06
119	169.843	168.836	17.2576	361765	359689	362845	358134	366210	382680	384653	381688	325767	341000	350999	354444	356389	381837	406513	413291	408745	437492	405022	404154
120	170.094	169.087	5.25725	269588	278901	285943	275348	286912	303297	301505	308250	661.296	0	322.536	0	345.912	638.472	935.247	0	388.746	1276.73	718.056	1056.62
121	171.84	170.833	17.2579	552761	553164	561635	556383	569342	598603	601670	600958	497216	534850	520665	552066	549531	600537	635916	621739	626299	652356	630556	641196
122	171.878	170.871	17.2476	292251	288737	287582	287105	300555	300457	320911	323694	275298	294986	278717	293775	301964	342715	360849	356187	356461	360913	356753	335419
123	172.073	171.066	3.84114	158634	161270	152410	147615	155158	148148	155519	153444	101273	259136	148464	191156	259295	85051.6	71458.3	30255.2	22278	105014	54535.9	100828
124	173.105	172.098	3.89878	1.49649e+06	1.483e+06	1.46931e+06	1.47053e+06	1.47441e+06	1.47545e+06	1.49391e+06	1.48723e+06	796999	2.72372e+06	1.27851e+06	1.47158e+06	2.58642e+06	498811	1.08275e+06	382212	388143	1.89837e+06	403360	1.25477e+06
125	173.105	172.098	4.02787	1.36156e+06	1.32929e+06	1.31765e+06	1.31349e+06	1.31178e+06	1.30954e+06	1.34576e+06	1.32467e+06	629228	2.491e+06	1.12977e+06	1.24986e+06	2.39878e+06	434105	1.02172e+06	193018	203944	1.67254e+06	298997	1.1526e+06
126	173.838	172.83	17.2579	258868	251540	264498	259706	280213	275933	281179	277618	230260	243962	243837	258423	257723	283915	293130	293061	296508	301134	288624	292739
127	173.999	172.991	3.46454	9.9932e+06	9.91198e+06	9.86414e+06	9.77637e+06	9.96554e+06	9.86998e+06	9.87873e+06	1.02148e+07	1.28775e+07	9.94257e+06	5.9613e+06	4.97147e+06	4.75914e+06	6.63672e+06	3.43009e+06	1.9411e+07	1.78712e+07	6.39107e+06	5.29427e+06	6.61879e+06
128	173.999	172.991	3.49197	9.93181e+06	9.85079e+06	9.80308e+06	9.71715e+06	9.90795e+06	9.81591e+06	9.82171e+06	1.01594e+07	1.27859e+07	9.87727e+06	5.91694e+06	4.9418e+06	4.74071e+06	6.59926e+06	3.40996e+06	1.92403e+07	1.77128e+07	6.35477e+06	5.2547e+06	6.57812e+06
129	174.017	173.009	0.92075	232850	240578	230874	232533	240928	231243	226932	214343	599239	297633	217037	209074	302879	161369	375105	275383	506762	388539	280641	428222
130	174.017	191.02	1.22158	3.16055e+06	3.06776e+06	3.18332e+06	3.11463e+06	3.09393e+06	3.08479e+06	3.08162e+06	3.10915e+06	6.19326e+06	3.14404e+06	3.70202e+06	2.36388e+06	4.24314e+06	2.19581e+06	3.96366e+06	3.17892e+06	4.1232e+06	3.75742e+06	3.40557e+06	4.18815e+06
131	174.089	173.082	3.90943	261684	295820	265264	277778	277516	248790	292759	266450	191620	358411	331625	304275	507390	151250	260918	139098	118009	502645	157652	341124
132	175.963	174.956	17.169	2.52058e+06	2.51189e+06	2.50419e+06	2.53897e+06	2.49831e+06	2.56374e+06	2.48445e+06	2.49833e+06	3.00857e+06	2.95787e+06	2.94042e+06	2.85747e+06	2.85279e+06	2.65929e+06	2.60496e+06	2.5447e+06	2.59208e+06	2.48382e+06	2.47617e+06	2.49994e+06
133	176.032	175.025	0.924926	83966.9	73455.1	76782.3	78909.9	77850.5	72288.5	74796.6	76531.6	554964	1.76056e+06	912347	2.98095e+06	3.22322e+06	129148	954405	66069.7	418574	2.19351e+06	65500.6	83532.5
134	179.058	178.051	3.70482	70505.1	72185	70142.7	68041.3	64865.8	68216.2	69361	65699.1	103838	125408	49141	24992	185141	28054.1	22973.3	34586.7	28826.7	154918	66887.6	38760
135	180.063	225.062	0.863736	676155	647033	665082	646534	614034	641378	614881	634007	643669	639652	865068	689293	773550	650625	468357	327477	368270	636011	392275	466753
136	180.115	179.108	4.6599	141853	139296	136555	135455	137420	141670	138943	140366	68785.1	147443	101051	81476.9	115027	87856.4	124643	215125	164674	160012	41150.3	106275
137	180.115	179.108	7.97448	199826	200887	200682	199836	194574	195726	198521	196810	185970	162530	180115	141518	133212	308301	238960	237917	253404	179345	135247	172641
138	181.907	180.9	17.2482	599482	594489	600192	608080	620571	611549	617945	637847	630208	644667	645470	671464	670854	702508	708784	721315	712748	700781	685826	673228
139	181.98	248.96	0.788557	1.50698e+06	1.47381e+06	1.49871e+06	1.52205e+06	1.51252e+06	1.5497e+06	1.53665e+06	1.56332e+06	1.50976e+06	1.59907e+06	1.44699e+06	1.53056e+06	1.52769e+06	1.56962e+06	1.48822e+06	1.44877e+06	1.47252e+06	1.31572e+06	1.52793e+06	1.4571e+06
140	181.98	452.922	17.1122	470821	440470	457575	444822	423243	389622	355378	366062	923318	886413	838254	805197	803154	614207	499732	495197	506374	376364	408616	394249
141	182.007	181	1.41663	239737	246011	254990	256045	261344	256048	276863	280646	4231.13	2126.48	944.232	0	353.616	10130.5	5382.08	6247.9	6816.1	0	7514.24	1918.58
142	182.014	181.006	3.41749	853727	874646	845032	839633	856324	837301	832472	832655	827882	792238	971498	919889	838072	884825	909905	724878	765820	866113	876516	880767
143	184.01	183.003	3.4172	270888	277930	268275	269079	276283	268155	272994	273160	264449	259338	302154	293235	267244	285893	293050	225647	242518	280005	277856	282846
144	187.053	186.046	0.945612	156997	155177	152159	140012	140813	142044	130226	140866	153381	213027	153263	266639	118960	510710	312828	125770	188777	234675	201976	171469
145	187.121	186.113	4.31085	82797.1	81730.2	79168.3	82969.7	84797.7	81701.1	82573.5	87387.9	46838.8	255001	60968.4	125613	332061	10044.1	32635.1	8790.8	13163.6	177243	5128.2	30118.3
146	187.937	254.917	0.815737	325237	330220	322420	309035	320910	319259	315247	327008	275481	272203	347992	339147	295376	303118	345322	332148	297949	438533	338225	362334
147	188.014	187.007	3.90052	3.90561e+06	3.83359e+06	3.81843e+06	3.78252e+06	3.85014e+06	3.8655e+06	3.87189e+06	3.91083e+06	5.25936e+06	2.77429e+06	917802	2.0883e+06	773826	3.02017e+06	2.57443e+06	9.77737e+06	6.33236e+06	2.71196e+06	3.65628e+06	1.20758e+06
148	188.049	187.042	0.945435	644496	626743	585053	557771	571259	551208	532551	549651	612144	855201	621080	1.11004e+06	495741	2.04453e+06	1.3021e+06	511106	761543	930871	843118	695953
149	188.105	187.097	4.14003	34658.6	59410.7	42879.4	51947.7	50814	46026.8	63085.4	54566.9	44540.8	314261	27952.1	267791	253293	8501.89	14835	252153	210780	229746	10342.3	31365.6
150	188.141	187.134	5.52871	294797	294265	297797	291388	301864	291180	294890	298592	196498	288422	260245	271553	275229	173255	424131	135669	185038	379617	228416	427946
151	188.141	187.134	5.91443	194417	194844	185798	186093	192460	190877	190862	188806	81954.5	260559	128632	172609	135606	156728	109954	95460.9	179005	147030	237891	146489
152	189.1	188.093	3.66444	131079	132196	129295	131568	129691	127426	133822	134023	116278	132015	107681	129968	131745	63994.1	72219.1	236442	251955	156155	65047	71658.6
153	191.936	190.928	17.2227	2.50762e+06	2.57619e+06	2.57072e+06	2.53217e+06	2.53302e+06	2.63277e+06	2.55488e+06	2.5928e+06	3.08501e+06	3.14053e+06	3.16578e+06	3.16313e+06	3.11576e+06	3.07321e+06	3.08487e+06	3.0366e+06	3.03746e+06	2.96546e+06	2.94825e+06	2.94169e+06
154	192.027	191.02	1.00635	2.91291e+06	3.1865e+06	3.09419e+06	3.11041e+06	3.17426e+06	3.27698e+06	2.84767e+06	3.06376e+06	5.97752e+06	2.92409e+06	3.28604e+06	2.10731e+06	3.93259e+06	2.12036e+06	4.00606e+06	3.2039e+06	4.11132e+06	3.86999e+06	3.43427e+06	4.59175e+06
155	193.074	192.066	3.84234	651449	647965	641085	622421	638865	625022	640751	632501	1.12472e+06	1.1884e+06	404804	309155	494337	556532	180246	432291	317537	343049	263741	369989
156	193.936	192.929	17.1776	577913	584510	584449	577719	563318	577544	575763	568265	695551	687257	688084	687639	684224	646168	646958	634483	641443	622897	614089	601247
157	195.089	194.082	6.54914	1.78238e+06	1.77369e+06	1.80823e+06	1.79208e+06	1.83709e+06	1.81719e+06	1.83898e+06	1.88158e+06	565747	581674	586564	608245	628158	615273	657382	689970	701577	721183	699582	724967
158	196.058	195.051	0.889641	443310	449664	451021	447392	459659	445529	443086	443030	368654	525532	402644	476388	642735	403483	229570	213179	250961	477697	272190	418165
159	196.818	195.811	1.02788	1.42446e+06	1.42611e+06	1.39612e+06	1.41434e+06	1.40938e+06	1.4429e+06	1.4439e+06	1.40013e+06	1.10913e+06	1.31008e+06	1.05836e+06	1.46041e+06	854536	1.57263e+06	1.42497e+06	1.79782e+06	1.54756e+06	1.07677e+06	1.71208e+06	1.42906e+06
160	196.818	195.811	17.2806	654058	625928	661702	660517	703989	651605	697568	691279	480703	455942	469116	485317	496428	535496	518350	512993	496889	552100	509287	520877
161	198.089	197.082	4.04989	142129	144827	139069	145133	146652	149558	147973	149522	65786.3	279738	84412.5	176904	326213	16764.9	167610	65292.6	57703.4	186318	71461.2	196860
162	198.815	197.808	1.02924	1.84867e+06	1.88561e+06	1.82672e+06	1.84609e+06	1.85293e+06	1.88963e+06	1.89676e+06	1.84909e+06	1.4484e+06	1.72138e+06	1.38259e+06	1.89814e+06	1.12971e+06	2.05874e+06	1.86951e+06	2.34131e+06	2.01815e+06	1.40898e+06	2.23493e+06	1.88832e+06
163	198.815	197.808	17.2807	821435	784999	832052	829135	892170	831761	881385	877828	610906	584220	606102	613436	624533	686288	657418	665734	625426	707263	660699	660871
164	199.04	198.033	3.41712	2.17854e+07	2.13395e+07	2.12357e+07	2.0878e+07	2.13994e+07	2.09689e+07	2.09174e+07	2.08886e+07	2.07995e+07	2.02024e+07	2.47059e+07	2.35676e+07	2.14376e+07	2.25453e+07	2.35789e+07	1.88776e+07	1.95286e+07	2.19949e+07	2.22783e+07	2.27066e+07
165	199.12	198.113	4.47031	54650.3	55210.2	59423.2	62333.5	61267.5	65481	63946.3	75266.5	29306.6	236133	41574.1	150542	327125	891.96	47601.5	76398.7	63609.1	243509	2637.05	50746.9
166	200.014	199.007	4.10684	433192	441863	442278	446980	462157	456205	467935	476055	447072	573825	151932	171292	609660	100853	190355	1.56034e+06	2.57208e+06	694373	123047	81712.3
167	200.045	199.038	0.894358	115134	117475	117057	118202	122887	124884	120004	125727	52451.2	72672.7	47138.7	59241.8	43728.6	68698.7	162316	401243	387948	111706	245704	160272
168	200.105	199.097	4.28128	144400	148279	144386	152682	154984	160324	149616	153511	45015.2	314346	81657.1	286170	272224	21554.4	104881	99789.3	94697.3	268364	54526.2	156057
169	200.812	199.805	1.02932	864849	870803	866024	873836	885117	881194	900966	875568	692474	815457	645749	895931	541519	966818	871490	1.09183e+06	945722	664933	1.04396e+06	892892
170	200.812	199.805	17.2808	382317	368951	384774	388763	417993	379734	415458	412657	286055	270668	275791	284855	287198	325744	303483	308722	286164	325034	308450	312854
171	201.037	200.03	3.41703	6.98444e+06	6.92974e+06	6.81758e+06	6.69782e+06	6.89722e+06	6.71524e+06	6.70049e+06	6.62984e+06	6.64322e+06	6.46792e+06	7.92148e+06	7.52762e+06	6.9331e+06	7.22805e+06	7.58958e+06	6.02272e+06	6.21083e+06	7.06385e+06	7.14037e+06	7.31585e+06
172	201.136	200.129	4.65897	622644	613426	602941	593813	598337	600415	603630	607346	637035	1.18608e+06	662647	1.08432e+06	914745	315944	234388	355708	463660	859498	371600	507120
173	202.045	201.038	1.18095	963880	964800	956676	969844	945392	959966	966200	964768	931758	943161	943577	1.02712e+06	841129	1.12271e+06	872858	842026	821592	806228	784574	797886
174	202.12	201.113	3.82668	113194	112363	109422	104412	109780	105310	105823	103031	87167.2	141578	86909.2	146933	113758	125718	96547.5	43922.4	53982.5	107097	85633.4	115627
175	202.12	201.113	4.4124	199581	212979	213340	213559	215989	219673	231739	223557	94557.9	417386	111648	247493	337418	8861.95	125168	187382	172007	322317	49672.4	205490
176	202.809	201.802	17.2849	75654.6	77716.3	77678.2	80007.2	84438.6	79499.2	85598.7	82396.2	56519.4	54441.4	58771.5	56884.3	56782.1	64842.5	61211.5	60031	61107.1	66357.5	65414.1	61563.5
177	203.058	202.051	3.98899	42767.3	38111	40239.4	36202.1	36224	34722.2	36844.6	34284.7	134027	230199	140039	128794	201117	328.008	70165.7	168256	278669	121198	46611.6	34448.7
178	203.116	202.108	3.93763	351935	341616	347412	332981	342928	338538	336355	352301	353749	370781	340660	418490	451990	156841	193800	596183	627317	512114	126302	193783
179	204.009	203.002	3.84124	72245.8	69519	71029.4	68549.1	71898.4	68444.9	67721.9	73055	155864	107382	19002.2	20127.8	22968.9	27204.1	14911.7	37389.9	39016.3	37920.7	35615.1	14076.8
180	204.09	203.082	3.36366	3.48989e+06	3.50531e+06	3.37045e+06	3.41625e+06	3.40111e+06	3.43651e+06	3.28659e+06	3.32808e+06	3.94964e+06	3.74758e+06	3.55644e+06	2.81894e+06	3.2872e+06	2.55733e+06	2.99867e+06	4.36493e+06	4.70683e+06	3.70509e+06	3.36981e+06	2.66885e+06
181	205.074	245.093	4.04242	318871	315690	307865	297855	311149	307881	303918	305762	558084	357543	388874	341681	413442	144940	165687	411563	497411	372329	254903	202896
182	207.089	206.082	3.98592	327915	325641	324232	319560	326244	322860	312477	323980	378052	324046	308551	470576	265559	308799	158327	654665	681261	432377	196116	255913
183	209.981	208.974	1.12135	1.12861e+06	1.12246e+06	1.129e+06	1.1391e+06	1.15574e+06	1.15517e+06	1.14797e+06	1.15137e+06	1.14046e+06	1.00389e+06	1.07182e+06	1.35747e+06	1.03616e+06	1.29231e+06	1.21278e+06	1.1797e+06	1.07492e+06	1.17875e+06	1.17512e+06	1.18734e+06
184	211.85	210.842	0.883206	547916	552600	541071	538619	544777	527011	532200	549801	516672	545949	512280	576995	410823	573469	484937	584956	558706	359953	557633	501884
185	213.009	212.002	3.6438	3.011e+06	2.99877e+06	2.97241e+06	2.93164e+06	2.93086e+06	2.95151e+06	2.94145e+06	2.94541e+06	5.64794e+06	3.5991e+06	2.2423e+06	1.81404e+06	1.97071e+06	1.90357e+06	1.90534e+06	1.15293e+07	5.32233e+06	2.71254e+06	3.6695e+06	2.24875e+06
186	214.034	213.026	1.41671	287345	286116	291760	304207	302565	301783	323962	321349	5924.07	3063.78	2524.82	379.728	605.472	12345	8669.09	10699.9	8775.53	1248.12	9676.62	3659.23
187	214.12	213.113	4.46151	35922.7	41885.8	44121.9	42786.1	46595.1	49354.1	53198.2	51612.6	2873.64	113867	4995.88	72689.1	78417.2	0	44521.2	130114	146995	191877	3634.25	30593.5
188	214.157	213.149	6.13655	700676	704230	698060	682312	697316	688314	691743	698548	355673	526472	427010	540455	482745	460875	1.34979e+06	323460	429547	850166	906150	1.21714e+06
189	215.005	213.998	3.64206	126304	125062	129036	119509	120589	119991	116175	120969	235373	147962	88263	70414	77792.5	73459.2	81212.9	499954	221698	105077	152321	92777.7
190	216.04	215.033	0.883821	1.69123e+07	1.70122e+07	1.71018e+07	1.66687e+07	1.68807e+07	1.64612e+07	1.64065e+07	1.65366e+07	2.40967e+07	1.90651e+07	2.64576e+07	1.93054e+07	2.67155e+07	1.93755e+07	9.75244e+06	7.40984e+06	9.07192e+06	1.53e+07	8.85139e+06	9.63852e+06
191	216.04	215.033	0.941256	1.8241e+07	1.80933e+07	1.81741e+07	1.76622e+07	1.79038e+07	1.75052e+07	1.7614e+07	1.7575e+07	2.54183e+07	2.04832e+07	2.81249e+07	2.05475e+07	2.83731e+07	2.09959e+07	1.02087e+07	7.76308e+06	9.5349e+06	1.59536e+07	9.34062e+06	1.00411e+07
192	216.04	215.033	1.44313	767115	750039	735435	712713	710826	693746	712417	685788	887112	670693	1.08701e+06	664173	924324	661673	261453	285620	383044	473805	239295	244488
193	216.172	215.165	6.71273	479409	478489	478008	461324	465371	458252	459842	477267	276664	380410	407618	392177	376249	367476	887170	143292	211468	599866	447735	868185
194	217.131	216.124	4.11338	21751.6	22654.6	22999.1	22176.5	25011.4	23729.7	27813.4	29469.3	2686.37	226184	7504.39	49041.6	192064	0	4854.82	35218.7	24518.2	81807.4	338.76	16909.4
195	218.037	217.03	0.885246	5.40219e+06	5.39483e+06	5.45196e+06	5.31341e+06	5.38351e+06	5.29446e+06	5.26187e+06	5.28094e+06	7.69047e+06	6.07052e+06	8.40613e+06	6.13997e+06	8.50648e+06	6.13604e+06	3.09904e+06	2.34192e+06	2.86814e+06	4.9008e+06	2.78831e+06	3.05867e+06
196	218.037	217.03	0.943186	5.83196e+06	5.73633e+06	5.80256e+06	5.63029e+06	5.70283e+06	5.57786e+06	5.64575e+06	5.61272e+06	8.10197e+06	6.51591e+06	8.94541e+06	6.53185e+06	9.02823e+06	6.65363e+06	3.24194e+06	2.44888e+06	3.0125e+06	5.10383e+06	2.94464e+06	3.1855e+06
197	219.11	218.103	2.33773	641926	636827	625943	609356	612024	621817	620972	621425	419878	529513	681887	458100	759097	749724	615714	658463	749616	804798	593168	553198
198	219.881	218.874	0.852169	216793	210726	217134	211398	215631	212206	208201	210985	190952	209218	197807	222104	162244	218944	214539	220704	207716	170598	224931	222653
199	221.878	220.871	0.852272	217777	209792	204353	205542	206051	209729	200369	214468	175160	190553	200832	206755	158399	208301	207678	218791	198513	169963	218829	211902
200	222.089	221.082	5.30669	198912	222300	199698	201309	211757	202419	215982	206611	205895	198828	198103	219287	202158	162562	181537	202702	205933	205461	188785	186278
201	222.162	221.154	7.74625	188744	179250	185614	187422	199087	195379	197964	205564	58555.5	70416.1	64582	78249.1	83040.2	66514.9	78161.6	86423.6	98565.7	89898.3	76209.1	69727.8
202	223.034	222.026	3.7748	625383	614217	620330	602886	617356	608698	611902	613178	717843	1.07942e+06	586215	482236	741995	295435	124647	23046.4	18257.6	282365	162773	252924
203	223.084	222.077	3.43389	93924.9	92827	89234.2	86929.8	90483.1	91537	90322.8	91167.3	102248	56117.9	47469.2	87309.8	49445.7	110685	51304.5	248444	269437	76195.7	86252.5	55845.8
204	223.088	222.08	3.72946	124938	123279	119458	118467	124432	129049	126696	134277	17471.6	90191.9	36674.2	42614.9	95430.9	17829.6	37947.6	1988.65	312.36	57697.5	22307.8	52720.8
205	223.121	222.113	4.95059	162426	158171	163069	156905	159020	161603	163015	164221	187426	231068	115626	145759	267027	36907.8	119949	213387	145651	269065	113282	192656
206	224.035	223.028	16.3967	676775	702407	724299	651317	687177	773956	715295	699048	382637	310476	344596	318776	289780	518788	1.65143e+06	1.61976e+06	1.53247e+06	1.32164e+06	1.36207e+06	1.24412e+06
207	224.036	223.028	16.4491	536257	543789	559209	514635	538000	566515	551650	534258	303594	232027	264728	241730	219754	408549	1.36342e+06	1.34536e+06	1.26566e+06	1.02129e+06	1.11101e+06	1.00303e+06
208	224.105	223.097	4.66092	140770	135207	143940	134134	134434	141471	140350	144105	75950.8	153277	108053	83446.8	123062	83462.5	137764	229097	183093	164920	42095.2	110189
209	224.141	223.134	5.48159	531782	524621	532337	557341	568916	564204	579859	604605	0	0	0	0	0	0	808.512	0	0	0	342.888	0
210	225.987	224.98	0.916112	262958	258516	260710	255922	256930	260570	247143	246019	234698	384787	416820	388568	399050	355539	307488	224849	174235	402821	124981	265970
211	226.069	225.062	0.862092	674501	645199	663744	644925	612489	639792	613283	632623	641225	637570	861977	687231	770192	648874	467646	326914	367722	634650	392275	466130
212	228.004	226.996	0.912925	84341.8	83940.6	79125.4	79368.5	71933.6	71362.9	70006.7	62434.8	513771	794006	361280	878230	746955	137089	481577	131190	623676	657701	88061.1	48638.3
213	228.136	227.129	4.88018	279503	282234	274478	273570	285235	283637	290271	286549	83020.4	276289	83829.8	136272	175672	43324.5	139340	173378	191735	211349	126177	192748
214	230.001	228.993	0.911706	23170.5	24582.4	16026.5	18358.4	15890.7	18095.8	13872.3	15567.7	153164	236089	104712	259240	220794	42083.2	146387	38692	183982	196749	18755.4	9476.38
215	230.04	229.033	1.26035	239658	236173	244477	243454	241776	240916	240093	234520	254527	234748	247735	248511	208415	269862	208907	177224	134938	197755	176734	193329
216	230.152	229.144	5.12288	172721	175837	174237	187211	181648	175779	182552	186280	80098.8	175156	84513.9	134816	162071	41822.8	171079	214346	213377	233449	112086	212847
217	231.907	230.9	0.839687	112181	107117	114187	113242	110572	107468	110843	108838	91925.3	112429	109799	113808	91082	111393	116327	103287	96275.4	102967	104965	111162
218	234.162	233.154	7.65452	238932	236446	236936	234768	234886	235238	246396	243892	209235	127188	171422	141778	141273	237571	152612	137443	119203	143996	184021	186768
219	235.866	234.859	0.97513	335892	336386	320941	322619	320698	324707	332852	332020	298146	300377	304132	373948	246797	385008	307020	425516	369129	268347	385141	311652
220	237.1	236.093	4.01059	189737	179943	181778	177897	184048	184796	178406	183464	260661	207825	214782	262266	271882	96193.9	130803	190492	199502	311628	61939.9	110832
221	237.976	236.968	1.29332	933645	895478	944646	946792	921690	917078	933845	951444	645776	862008	987488	1.01741e+06	1.05266e+06	921681	871284	525609	348776	1.0857e+06	621949	866472
222	238.156	237.149	6.17664	130802	124614	122925	133000	128143	129335	131429	131040	71281	88576.4	68046.9	87100.3	81212.8	82594.7	158588	58526.7	83759.6	105241	170405	153251
223	239.939	306.919	0.82987	103961	101527	106241	107824	109608	105509	106671	115876	104186	114125	102728	111403	94373.7	112172	105257	99974.5	97958.3	92570.2	104795	101758
224	240.074	239.067	7.455	97609.6	92722.5	91529.5	90462.7	89836.7	87505.4	82234.6	82256	187149	126841	90476	94028.5	105257	246224	92039.4	80956.9	115620	108438	149316	76672.5
225	240.172	239.165	5.71988	182779	176997	180034	166746	179046	173309	172233	180011	113239	318227	151884	253946	163088	90350	118761	45931.8	57344.3	145835	120048	169273
226	240.172	239.165	6.23305	81411.5	76841.3	79153.3	81431.9	80039.9	77063	78729.7	77917.7	30130.7	55645	29643	45003.9	40236.9	53209	146408	113484	70935.3	116666	239138	96985.7
227	240.172	239.165	6.76746	2.01508e+06	2.03112e+06	1.9998e+06	1.95783e+06	1.99025e+06	1.96762e+06	1.96877e+06	1.97211e+06	997284	1.74966e+06	1.30482e+06	2.03253e+06	1.4641e+06	1.69477e+06	3.26733e+06	823742	1.23086e+06	1.90708e+06	2.5963e+06	2.7781e+06
228	242.188	241.181	5.82853	273355	276970	268802	264075	266757	266974	260654	271427	110522	333441	146913	294832	178411	232033	297193	79801.8	125794	292723	223667	362458
229	242.188	241.181	6.33466	372762	368398	360407	353456	358765	350132	342029	357929	190631	500033	223776	419866	230600	296918	334093	162252	197084	345099	394112	391970
230	242.188	241.181	7.19272	2.78687e+06	2.75399e+06	2.76397e+06	2.71408e+06	2.73793e+06	2.69476e+06	2.72652e+06	2.77317e+06	965153	2.31923e+06	1.28933e+06	2.36486e+06	1.78144e+06	1.43527e+06	4.85349e+06	1.27081e+06	1.74004e+06	3.27136e+06	3.24542e+06	4.04711e+06
231	242.188	309.168	7.39818	414143	415244	413243	411388	417370	413631	410481	439699	146887	388493	177297	383697	304190	233066	687902	216650	294876	515949	466707	537692
232	243.183	242.176	4.87404	741805	733546	738275	739803	739231	743731	757308	741368	787195	642439	628999	580855	594920	525803	506808	553023	642900	646114	499100	555461
233	244.07	243.062	0.914587	177350	171137	166867	170779	170476	173720	164250	167709	116252	144811	127723	132954	226546	139980	166729	166355	156920	137142	179403	157782
234	244.167	243.16	5.67043	159837	155942	150216	151571	155694	156391	162505	148601	152763	184771	161989	127629	179230	156794	66249.3	104541	100267	129564	90282.6	110107
235	244.204	243.196	7.91297	183397	183813	176099	173325	173856	176878	169763	167183	108142	181623	164619	166896	168210	146983	249409	49306.9	53378.2	190206	130812	275802
236	245.895	244.888	0.827685	56033.8	53490.8	50864.2	56288.3	54255.3	53651.5	51400	58172.9	46241.4	44630.2	61338.9	61111.8	51265.8	50944	60697	60138.1	52431.9	71736.6	54525.7	58302.9
237	245.915	244.908	5.04763	156930	155979	155800	154883	154658	157327	154659	154693	2679.75	562173	7388.5	10387	9994.42	2407.54	484.776	6041.28	9462.75	379.536	388.344	361.32
238	247.912	246.905	5.0524	141938	139337	143908	141117	149629	143403	145847	149220	1570.49	537586	6746.49	6376.67	5872.39	2571.05	0	3110.15	6963.55	2441.18	380.328	1161.5
239	249.967	248.96	0.807834	1.49561e+06	1.46257e+06	1.48856e+06	1.51142e+06	1.50059e+06	1.5378e+06	1.52595e+06	1.55287e+06	1.5007e+06	1.58825e+06	1.43609e+06	1.52083e+06	1.51827e+06	1.55896e+06	1.47645e+06	1.43722e+06	1.46068e+06	1.30697e+06	1.5176e+06	1.44645e+06
240	249.967	248.96	17.073	2.18215e+06	2.11393e+06	2.15318e+06	2.1151e+06	2.03451e+06	1.98827e+06	1.85107e+06	1.8972e+06	3.18136e+06	3.15325e+06	3.00339e+06	2.92225e+06	2.95229e+06	2.51783e+06	2.27893e+06	2.22204e+06	2.26402e+06	1.91298e+06	2.04939e+06	2.00338e+06
241	250.095	249.088	3.86101	73139.1	70140.5	68818.6	64767.3	66770.1	68304.6	67728.4	68871.9	116301	52119.8	59986.6	35556	50532.5	47145.7	54721.4	122865	161480	66180.2	87001.7	64677.4
242	250.12	249.113	5.63907	153409	150053	146299	154570	145672	144408	135133	137678	316001	326502	304563	321393	318746	275625	288071	290313	301271	297549	269235	267520
243	250.157	249.149	6.69939	187992	185399	177556	172734	181090	179088	177309	179401	345135	126396	486832	73899.4	88502	736534	4198.4	1469.42	6445.21	5668.21	23206.7	30945.6
244	251.119	250.112	3.86872	222582	213562	209877	215977	231364	242296	239078	248211	8148.23	10064.1	24831.9	10168.5	6077.81	600.552	19056.1	1345.25	19492.4	16240.6	2472.5	4500.61
245	254.152	253.144	5.17589	270533	270308	261866	260054	280094	273456	284924	278598	123426	283759	133460	205578	236914	58954.1	209886	461433	534046	285293	197398	210410
246	254.152	253.144	5.89154	171883	169289	162323	168657	159125	156182	160919	159164	130308	133992	108995	81629.9	169735	80274.9	204018	358069	234410	216411	332185	203184
247	254.188	253.181	6.87838	102466	102404	102690	100313	103382	105711	101020	101532	9173.11	218185	2479.72	10682.1	2599.58	7194.06	10386.2	25649.5	9828.36	63524.7	95481.1	34507.9
248	254.188	253.181	7.28995	221275	219668	216362	200357	216054	214287	216434	211775	50975.9	432006	82805.2	111944	129169	113430	32064.6	25843.8	30165.4	99262.5	141115	100437
249	254.224	321.204	9.81117	144377	150049	146948	147998	151256	148869	156026	150865	46413.6	136135	93560.2	120681	138643	70127.9	326365	104660	93312.7	318233	196428	363214
250	255.989	254.982	0.924725	921275	886330	891133	890468	858644	858200	819861	828670	841130	988021	1.01648e+06	1.31858e+06	1.2668e+06	1.41549e+06	1.00455e+06	868842	1.11963e+06	1.75048e+06	743924	855443
251	256.167	255.16	5.66965	330200	320847	318316	318580	322945	329486	324682	333480	136246	287166	119078	175416	270590	94443.3	274447	472282	454957	436779	189066	338660
252	256.24	255.233	7.93569	5.72987e+06	5.89875e+06	5.85482e+06	5.75124e+06	5.71827e+06	5.75521e+06	5.80046e+06	5.73836e+06	3.95129e+06	7.10142e+06	5.12174e+06	7.08826e+06	6.54156e+06	4.48611e+06	5.55673e+06	5.01541e+06	5.02975e+06	7.03728e+06	4.70351e+06	5.31708e+06
253	256.24	255.233	8.00465	4.59728e+06	4.8703e+06	4.83895e+06	4.74249e+06	4.71824e+06	4.79524e+06	4.85057e+06	4.78084e+06	3.18428e+06	5.96795e+06	4.22572e+06	5.9647e+06	5.49411e+06	3.67359e+06	4.62708e+06	4.15677e+06	4.22138e+06	6.0367e+06	3.94551e+06	4.54818e+06
254	256.24	255.233	8.12994	6.93745e+06	6.96699e+06	6.87162e+06	6.80612e+06	6.74974e+06	6.75861e+06	6.82221e+06	6.69974e+06	5.10057e+06	8.91443e+06	6.35373e+06	8.62862e+06	7.88207e+06	5.2894e+06	6.47127e+06	5.86399e+06	5.86684e+06	8.26713e+06	5.37363e+06	6.05847e+06
255	256.24	255.233	8.1856	6.18647e+06	6.16635e+06	6.07751e+06	6.02027e+06	5.97953e+06	5.97198e+06	6.05491e+06	5.9197e+06	4.43708e+06	7.78588e+06	5.54079e+06	7.5117e+06	6.9502e+06	4.45968e+06	5.57642e+06	5.09089e+06	5.02111e+06	7.35143e+06	4.65548e+06	5.28444e+06
256	256.24	255.233	10.8121	427145	415751	433797	413582	418322	423792	440084	446632	300587	405330	398282	383716	396169	480467	499863	254467	238734	577877	456221	560737
257	256.967	255.96	1.42973	30204.5	33106.7	32370.4	31894.5	31064.7	28623.9	31905.1	32641.6	37508.6	31894	29024.3	49441.1	18625.8	29712.4	36496.7	311931	282529	33402.4	69113.1	42237.6
258	258.183	257.176	4.99814	197566	196005	187653	190517	197571	197672	205679	200047	100833	337485	100144	359316	169796	62014.9	121638	80084.2	106073	181409	120337	152412
259	258.183	257.176	5.31798	148075	141575	144888	146969	147429	149892	144979	146988	55857.5	172475	73958.6	162612	89300.8	84984.2	131902	82713.3	92402.5	117959	147102	157347
260	258.183	257.176	6.0126	527734	538291	526617	524870	526608	544253	537575	519823	229082	494350	272203	272388	500231	269757	530372	762545	556281	838195	356059	569875
261	258.235	257.227	7.97638	380427	384437	388556	374669	375937	375753	382866	380410	356585	309473	334340	293320	259551	600521	460173	450564	511242	328068	261091	346404
262	260.085	259.078	0.768842	55140.9	54389.1	50240.4	54460.3	57611.9	54342.8	55285.1	56378.7	106809	46124.7	66202.8	54430.5	52181.5	34154.1	57949.9	78587.5	111638	62228.5	35929.5	33544.6
263	260.137	259.13	3.50785	376224	369915	352841	350958	352397	346334	359105	353767	333756	336588	255446	211381	308390	240656	312709	576930	616300	309552	413033	290795
264	261.031	260.023	1.22983	192989	171522	187952	178570	173628	181262	182696	187145	159737	139155	305488	131245	169799	124965	142889	175502	311360	195731	227303	128799
265	261.88	260.873	0.816217	84071	84001	73197.7	76767.3	76050.9	73813	78691.1	75912.4	62938.4	51238	96973.5	86767.6	71172.9	61684.4	89430.7	90320.8	67256.2	159508	79654.3	99516.7
266	262.014	261.007	3.54301	83904.5	80727.5	85684.6	83698.1	82937.3	75713	82207.2	78929.4	49103.3	228782	26655	19421.6	65083.7	17927.5	23802.6	57601.2	46010.4	33244.9	29581.4	22740.5
267	262.051	261.044	4.52643	45929.6	48189.6	42074.4	44448.4	44520.3	42612.1	47609	45302.5	26463.5	35608.5	20503.2	41506.6	44829.9	42200	44854.9	150316	150128	86031.5	58384.5	35266.8
268	262.12	261.113	6.27986	107430	100636	99486.7	100438	98433.8	98930.7	92104.6	99768.5	206518	150895	291689	71770	89609.4	185150	0	361.08	898.776	526.56	9331.54	16730.8
269	265.995	286.97	1.05146	220875	220719	214101	210887	214669	208806	204940	204189	209005	309051	340743	341075	377999	284373	307559	220100	164747	427127	115349	253074
270	266.152	265.144	4.93851	146034	149764	149258	150168	154181	162389	162624	158993	77787.5	371.136	75329.4	676.008	0	178917	0	0	320.592	349.632	362.952	780.522
271	266.151	265.144	5.77755	265002	255255	258905	250593	251297	263797	253523	249929	637963	310957	619006	205213	211830	325339	3520.81	5439.3	10898.6	12590.9	33201	41186.6
272	266.155	265.148	7.32661	967185	937507	948023	926757	937747	916836	945236	918048	1.02448e+06	859844	780137	855842	972402	953585	859622	928553	960962	836201	1.14635e+06	819807
273	267.027	266.02	3.39364	2.41451e+06	2.40206e+06	2.31684e+06	2.33633e+06	2.37111e+06	2.37848e+06	2.31808e+06	2.31237e+06	2.3906e+06	2.28508e+06	2.58639e+06	2.62351e+06	2.44806e+06	2.47322e+06	2.71066e+06	1.92437e+06	1.97446e+06	2.43754e+06	2.59109e+06	2.48137e+06
274	267.035	266.028	3.34004	100359	106187	97612.3	100886	102225	103603	95120.6	91630.7	121312	89835.7	75204.4	87380.2	94899.5	61147.2	69209.1	170596	152904	95823.1	79784.3	66943
275	267.811	266.804	0.880713	722859	706571	714117	709963	699604	716946	706407	716538	630012	710566	632040	754031	479397	758540	655137	833596	770294	454992	765829	676493
276	268.121	267.114	5.86854	375389	376048	358484	361330	372105	374167	369313	369526	333485	115904	122959	35025.3	109782	263516	147602	129511	262902	197099	284766	372898
277	268.121	267.113	6.008	337467	330284	310303	311956	321960	321344	323314	320053	276937	97917.2	106436	30739.5	96634.3	236017	130313	113152	216926	178448	249230	319291
278	268.204	285.207	6.99199	605426	584762	584489	585752	599836	584234	589976	587186	344717	510813	305560	408470	510521	276108	587538	1.41659e+06	1.1097e+06	764766	421008	534398
279	268.204	267.196	7.65523	118765	119551	118744	124478	122122	125524	128826	122526	75976.7	131160	83675.5	133388	113974	101357	171547	39365.5	43314.9	114265	98355.6	149798
280	269.808	268.801	0.880581	1.1795e+06	1.16709e+06	1.14228e+06	1.1435e+06	1.1454e+06	1.1576e+06	1.1493e+06	1.14793e+06	1.01706e+06	1.14483e+06	1.03118e+06	1.20739e+06	776765	1.25094e+06	1.07938e+06	1.3391e+06	1.25297e+06	733250	1.24424e+06	1.0915e+06
281	270.074	269.067	3.60873	63749.8	58870.2	57162.1	60569.3	59483.7	61570.3	57846.5	60760.6	131658	111928	46901.8	23333.8	36489.6	33335.6	7331.15	23164.6	25198.1	23624.5	15112.2	42894
282	270.219	269.212	6.74841	432527	436861	437273	425532	419865	413501	428654	425522	159630	485426	297924	460271	327808	490206	642710	116164	136623	810911	376357	822082
283	270.219	269.212	8.35239	285819	283800	288017	292758	300247	294580	296068	306340	124863	217103	207002	243101	232005	228923	518751	102851	114983	326230	251272	512276
284	271.805	270.798	0.880535	724530	728410	717754	722000	726170	718707	713152	728724	649442	732545	647136	774071	496468	783037	673625	833760	782364	449104	779273	682462
285	272.077	271.07	3.3344	1.07359e+06	1.07102e+06	1.0151e+06	1.04418e+06	1.04652e+06	1.06617e+06	1.01745e+06	1.02847e+06	1.20172e+06	1.12954e+06	1.03753e+06	955878	1.04289e+06	905700	1.00337e+06	1.01593e+06	1.09012e+06	1.12117e+06	1.11226e+06	911368
286	272.198	271.191	6.49397	90830.2	87490.2	90188.9	83530.5	91406.9	88837.3	87354.7	84667.7	48254.9	80332.3	40756.7	51233.1	56950.7	38907.8	57981.1	252119	177785	98099.5	112486	86612
287	272.235	271.228	7.29912	814079	786430	763075	761203	761259	759894	753299	733849	345663	982992	653355	905129	677693	1.27321e+06	750439	195098	198232	918637	492073	892259
288	272.235	271.228	9.04881	200574	203076	203191	198460	198031	197760	202079	200587	94778.7	196947	200880	158457	214461	145123	326565	70369.7	71983.8	325859	188035	391991
289	272.235	271.228	9.48191	845859	860048	868686	849021	840089	840505	871994	839819	551802	952695	516558	680219	863799	408367	672385	726752	618446	805203	661060	696613
290	273.061	272.054	4.04254	98034.3	98092	102532	93524.5	100681	98092.1	103378	99444.8	65292.9	105177	68471.7	99865.9	106472	21922.8	79607.7	359369	304148	116302	92398.7	78099.1
291	273.966	272.959	0.760304	49208.5	43129	44706.7	43332.8	42608.2	44113.5	43832.5	42662.5	153065	60524.3	102649	80268.6	86976	36514.8	80886.3	12755.7	37870	75314.1	15400	24038.5
292	275.119	274.111	3.66549	85365.4	83377.1	83007.1	87380.3	83490.6	82170.5	85092.9	83246.9	61462.6	130168	102918	76910.9	188991	51456.7	75084.8	5807.77	10540	82871.4	41459.5	105429
293	277.134	276.127	4.67902	84381.8	83447.8	86388	84736	82846.4	82664.7	87016.5	86656.6	17696.9	84450.9	24586.5	57305	57341.5	13945.3	209895	8399.93	6553.6	96270.7	83175.5	145548
294	278.081	277.073	0.936403	73405	69776.2	66693.1	62604	63997.7	61121.4	60819.7	56314.7	87584.4	95886	82364.4	103367	62840.2	197328	116676	43393.5	86647.8	86732.6	93161.3	65763.7
295	278.191	277.184	7.04249	1.58773e+06	1.55515e+06	1.47987e+06	1.47883e+06	1.43223e+06	1.38858e+06	1.38424e+06	1.33573e+06	1.20356e+06	1.67492e+06	457869	772760	425900	2.62088e+06	237741	583859	269393	527978	1.87463e+06	281180
296	279.837	278.829	0.851342	267489	256403	258470	262513	256001	252350	253640	260911	212271	239344	239089	265627	192637	255401	255773	275604	245870	204111	268201	270320
297	280.203	279.196	6.82694	123634	122996	126323	119756	123719	117153	120528	122916	147364	98438.2	139186	53970.5	68527.6	214520	168586	160146	203835	109964	31859.2	70246.4
298	280.24	279.233	7.2589	3.13399e+06	3.08356e+06	3.0598e+06	3.03413e+06	3.0573e+06	3.01432e+06	2.98649e+06	3.04769e+06	3.8575e+06	2.86947e+06	4.18997e+06	2.8548e+06	2.96886e+06	3.47891e+06	3.25209e+06	2.14771e+06	1.82467e+06	2.96255e+06	3.52471e+06	3.66433e+06
299	280.24	279.233	7.47001	2.26664e+06	2.37362e+06	2.39092e+06	2.34856e+06	2.35643e+06	2.36217e+06	2.33542e+06	2.35986e+06	2.76561e+06	2.05717e+06	3.08902e+06	2.16673e+06	2.28774e+06	2.59215e+06	2.47485e+06	1.67846e+06	1.46764e+06	2.27372e+06	2.70796e+06	2.81231e+06
300	280.24	279.233	7.60665	3.13698e+06	3.08815e+06	3.06345e+06	3.03764e+06	3.05898e+06	3.01659e+06	2.98708e+06	3.02784e+06	3.86934e+06	2.87038e+06	4.19767e+06	2.85881e+06	2.9735e+06	3.4832e+06	3.24006e+06	2.12106e+06	1.80911e+06	2.95292e+06	3.51791e+06	3.64624e+06
301	280.24	279.233	10.1012	1.18168e+06	1.19368e+06	1.25738e+06	1.20908e+06	1.25219e+06	1.22672e+06	1.17508e+06	1.28865e+06	678703	1.1005e+06	1.06268e+06	1.10927e+06	1.31237e+06	2.32591e+06	1.4857e+06	604694	507013	1.43847e+06	1.16579e+06	1.49992e+06
302	280.24	279.233	10.1066	1.15739e+06	1.16976e+06	1.23562e+06	1.18724e+06	1.22692e+06	1.20525e+06	1.15305e+06	1.25676e+06	668683	1.0827e+06	1.04345e+06	1.08857e+06	1.29105e+06	2.28389e+06	1.43895e+06	577132	485664	1.40374e+06	1.1316e+06	1.46078e+06
303	281.834	280.827	0.851257	124611	119689	120515	120167	114056	118340	124397	117683	95575.6	116075	115382	131338	85722.9	117410	114851	126180	122158	90841.2	131489	126089
304	282.079	417.047	0.785956	86824.2	78007	85394.8	85240	83047.4	84407.1	86673.2	87062.5	89546.3	55447.1	65054.6	64540.8	58390.9	56165.7	64419.6	236060	199943	72010.4	97491.6	61024.8
305	282.235	281.227	7.86196	216883	215578	217854	216527	221800	215403	225617	217107	173428	182271	155939	129488	126512	127211	256934	223085	377250	195950	125668	150277
306	282.256	281.249	7.92038	233985	234357	226774	221705	222482	212814	212868	195721	192657	265925	210653	269839	173134	149492	221991	134985	120495	113131	244813	211397
307	282.256	281.248	8.26377	2.08016e+06	2.10993e+06	2.04146e+06	2.05849e+06	2.04362e+06	2.02475e+06	1.99177e+06	1.9395e+06	1.97984e+06	2.01047e+06	2.23186e+06	2.06569e+06	1.67271e+06	2.05891e+06	2.28232e+06	1.64543e+06	1.4556e+06	2.20634e+06	2.40089e+06	2.81457e+06
308	282.255	281.248	11.0198	1.13513e+06	1.12671e+06	1.12193e+06	1.13579e+06	1.11753e+06	1.08694e+06	1.11821e+06	1.09316e+06	437552	1.05001e+06	924669	993699	1.06426e+06	1.02183e+06	1.55867e+06	500507	493152	1.72234e+06	1.23473e+06	1.6933e+06
309	284.075	283.068	1.3598	313417	303750	305559	304127	291722	301072	300516	301482	39799.1	379271	316568	166785	582188	167033	213979	122342	35838.4	622621	81556	210657
310	284.089	283.082	3.87826	205424	193862	192216	189094	192405	196231	194837	191349	352911	254889	74007.6	121621	48741.1	180081	170407	143182	105676	154489	145311	109574
311	284.198	283.191	6.52486	435524	418963	422230	429136	431886	423940	427680	421033	217079	381368	183344	280620	345702	186909	461462	707441	639454	640309	296179	476341
312	284.25	283.243	9.68845	311704	305679	295541	291339	302252	293444	301350	292679	157060	320026	132527	309861	268398	633866	294925	193215	203998	358856	229159	170165
313	284.271	283.264	9.38652	3.9439e+06	4.10556e+06	4.04607e+06	3.96002e+06	4.05326e+06	4.00611e+06	4.03934e+06	3.97885e+06	3.017e+06	4.90183e+06	4.81662e+06	6.56244e+06	5.67084e+06	3.85612e+06	3.73952e+06	2.96302e+06	3.39842e+06	4.9845e+06	2.79702e+06	3.08559e+06
314	284.271	283.264	9.63725	5.74518e+06	5.83139e+06	5.70991e+06	5.57419e+06	5.67361e+06	5.53347e+06	5.55489e+06	5.43099e+06	5.55655e+06	7.96468e+06	7.61957e+06	9.89812e+06	8.29029e+06	5.45416e+06	5.08401e+06	4.03257e+06	4.56911e+06	6.45676e+06	3.72873e+06	4.02744e+06
315	284.271	351.251	12.0473	265192	263473	268796	262169	255232	290571	342317	383242	161666	155096	168414	179021	175100	247421	365955	222234	264055	458415	467419	477471
316	284.271	283.264	9.7736	4.63239e+06	4.59575e+06	4.46063e+06	4.36978e+06	4.44007e+06	4.26987e+06	4.34773e+06	4.2202e+06	4.29695e+06	6.11889e+06	5.93656e+06	7.54018e+06	6.29148e+06	3.92143e+06	3.83138e+06	2.98862e+06	3.2797e+06	4.8995e+06	2.7649e+06	3.02105e+06
317	285.049	284.042	6.51155	143453	144170	140203	142983	143129	141325	141368	137025	174214	187936	218055	131862	179934	162764	1293.67	1299.12	2403.29	1584.23	3060.98	2952.34
318	286.214	307.188	6.99726	256331	249729	251010	244289	247923	241223	245431	239870	159047	247823	151666	195422	240784	126184	239782	616521	480941	331786	176512	216742
319	288.23	287.223	5.90889	123703	133343	140436	135512	132349	129161	133182	129562	43972.8	108586	73249.6	91207	64674.8	63964.8	236110	46356.8	82576.6	231610	265210	323098
320	288.23	287.222	6.05847	147907	141166	138185	138643	139585	138962	137152	138758	28454.6	103314	74482.4	85748.1	77317.8	72145.5	348012	27819.9	35865.9	357449	210159	356220
321	292.044	291.036	4.90509	56959	50520.8	53669.9	52576.5	52124.7	47818.3	48848.6	45227.7	183437	146108	281897	110077	194206	38513.7	0	0	0	0	1065.16	1690.61
322	292.207	291.199	7.8166	784235	779830	759610	738323	734193	707767	704165	689927	613033	687400	217974	333598	214676	1.17442e+06	140938	352192	194388	248792	944877	197822
323	294.121	293.114	3.57406	135989	132889	132587	133269	131038	129652	130375	130765	159180	134723	119914	91749.4	140040	109775	135814	140104	158418	142338	123976	109952
324	294.186	293.179	8.99539	1.07065e+06	1.06823e+06	1.08772e+06	1.07104e+06	1.07094e+06	1.04602e+06	1.04258e+06	1.01653e+06	1.3826e+06	1.14646e+06	1.17741e+06	1.11848e+06	1.22751e+06	1.21892e+06	1.05241e+06	1.06706e+06	1.08228e+06	956843	1.11346e+06	1.03138e+06
325	294.219	293.212	7.1713	257027	253834	250818	256687	254191	251539	254848	246074	180726	210047	337887	161601	219916	164969	526747	101731	141059	311958	163498	327517
326	294.219	311.222	7.47135	304110	297639	310906	309309	304805	304108	311776	304850	145304	255716	102355	227951	174391	108646	228386	850798	1.03006e+06	279389	291686	217872
327	296.235	295.228	7.21325	974238	966921	947250	948539	942093	915133	938978	892438	494367	1.3335e+06	855427	1.34086e+06	843617	1.60435e+06	639355	119807	132711	672975	404385	759324
328	296.235	295.228	7.60269	1.43736e+06	1.4651e+06	1.43711e+06	1.43486e+06	1.46179e+06	1.44277e+06	1.47509e+06	1.44314e+06	890335	1.69407e+06	1.90968e+06	992349	1.62262e+06	590088	2.20183e+06	922230	1.39377e+06	1.69646e+06	680848	1.13792e+06
329	296.235	295.228	8.59414	293565	302331	303246	302379	300076	312377	299564	296891	97071.9	278260	234953	283648	370744	260766	359436	97920.1	97334.4	283127	142316	331717
330	298.251	297.243	7.78069	2.03243e+06	2.02563e+06	2.00315e+06	1.9992e+06	2.02273e+06	1.96547e+06	1.98931e+06	1.97648e+06	676203	2.63353e+06	1.46017e+06	2.5404e+06	1.67784e+06	2.54908e+06	1.74248e+06	379215	440797	1.78894e+06	1.4023e+06	2.01638e+06
331	298.25	297.243	7.90712	1.91862e+06	1.71924e+06	1.68465e+06	1.71684e+06	1.78211e+06	1.68635e+06	1.71883e+06	1.7274e+06	565115	2.16948e+06	1.26846e+06	2.09854e+06	1.47478e+06	2.20973e+06	1.5517e+06	358967	394691	1.62018e+06	1.31905e+06	1.73493e+06
332	298.25	297.243	9.33491	466533	460715	452609	444484	444264	441595	438631	420850	185433	581872	453344	474335	498689	333342	675566	146358	168394	487256	252496	693338
333	300.266	299.259	8.38532	496292	498831	489054	506183	501056	493888	494270	490247	216124	440625	383824	405068	383019	647184	487338	172730	287555	530989	554625	588233
334	300.266	299.259	8.64228	438360	382264	385107	411749	398463	386780	399425	398567	165610	257091	258490	248273	289366	424135	415209	162584	274923	454541	498382	479841
335	302.224	319.227	7.97626	2.94732e+07	2.95979e+07	2.92661e+07	2.87961e+07	2.86789e+07	2.86531e+07	2.94339e+07	2.86911e+07	2.78776e+07	2.3824e+07	2.6839e+07	2.16866e+07	1.93571e+07	4.51358e+07	3.48429e+07	3.50944e+07	3.86898e+07	2.51812e+07	2.00599e+07	2.60144e+07
336	302.224	301.217	9.2502	172935	174672	178022	165154	168990	163290	171262	158264	132755	177041	145513	210267	233959	492272	121499	90006.7	71592.9	374650	220798	151743
337	304.134	303.127	4.49172	68842.9	70325.6	67651.3	72013.9	70171.2	72816	74084.6	73139.8	6599.25	36645.6	51325.6	19053.1	35473.8	13962.7	110882	207352	390477	92131.8	138676	76431.3
338	304.24	303.233	7.42808	1.05515e+06	1.0518e+06	1.01887e+06	1.00273e+06	1.01259e+06	1.01295e+06	997063	974571	1.39713e+06	636777	1.52156e+06	874957	627194	1.59728e+06	1.28557e+06	841841	851465	662110	1.40909e+06	1.53832e+06
339	304.24	303.233	7.56499	880530	881389	855127	836773	851567	845438	833860	819927	1.13936e+06	481082	1.207e+06	664407	468402	1.38474e+06	1.11719e+06	671353	692834	536545	1.19503e+06	1.31256e+06
340	304.24	303.233	9.91535	6.64528e+06	6.47983e+06	6.17572e+06	6.23369e+06	6.11665e+06	5.93384e+06	6.10849e+06	6.00642e+06	2.60616e+06	4.29929e+06	2.89627e+06	5.556e+06	5.00039e+06	2.42979e+07	5.01462e+06	2.37193e+06	2.04523e+06	6.78748e+06	4.97333e+06	3.63611e+06
341	306.044	305.036	3.37037	157106	154737	164954	167564	167332	175129	173569	176218	34362.4	30502.8	27071.7	20195.3	43689.4	20601.1	42624.3	362721	101283	65599.7	141048	62488.4
342	306.255	305.248	10.7184	129869	128292	122014	120967	121964	120984	126542	117924	86213.5	93447.3	106263	192779	121196	274679	241631	126002	96046	399759	245467	192344
343	307.925	442.893	0.828184	45629.1	47787.2	44483.3	47703.9	43575.8	49273.1	47146	45531.9	49877.5	49214.5	41831	51831.8	39244.9	51087.8	42271.1	40764	44066.5	30175.3	48167.5	40797.2
344	308.071	307.064	4.6317	219593	218086	214702	214021	220191	214961	210790	220099	189774	377840	252267	175207	371614	79791.6	137416	147412	142679	249643	145366	184483
345	308.071	307.064	5.28922	67028.5	67595.6	63800.3	63665.9	67559.5	66921.4	62697.5	61012.9	2785.11	200441	5024.35	0	882.288	0	0	0	0	0	0	0
346	310.108	309.101	4.53407	28400.6	26481.5	26880.1	25379.2	28154.4	26258.1	29343.8	25484.3	0	174924	0	6681.79	1942.36	0	0	3559.66	8657.69	375.816	779.352	2973.59
347	310.214	309.207	6.98182	191619	191946	199743	196541	197498	189965	194785	198023	98032.7	106986	77237.7	112573	102396	78666.6	76637.3	190654	220704	105755	97618.4	109424
348	312.175	311.168	7.89481	889376	904399	879230	862374	871516	871036	882522	854749	975770	452600	787464	576000	963593	514752	500024	651544	515350	423263	834651	415154
349	312.175	311.168	7.99294	1.16611e+06	1.18617e+06	1.15203e+06	1.14056e+06	1.14784e+06	1.14291e+06	1.16611e+06	1.12655e+06	1.28881e+06	591166	1.02363e+06	751145	1.23994e+06	681301	648305	832260	649048	536686	1.01832e+06	517476
350	312.209	311.201	8.546	429236	439456	428463	425311	422914	428146	421508	411467	287761	283103	289324	283382	329135	305442	276654	301424	312198	275998	282012	278007
351	314.126	313.119	4.81053	228510	214197	210198	213756	221404	219445	228225	229624	170991	96818.8	143363	24404.1	100910	130486	83609.1	73358.8	127117	121688	163548	178655
352	314.192	313.185	0.77476	6171.14	6838.37	6783.1	6126.1	7338.69	7092.59	6681.48	8034.16	6270.79	2038.68	2848.03	3137.47	1749.58	2309.64	4342.46	99618.5	66202.9	6590.52	11765	4535.72
353	314.245	313.238	6.48159	1.1503e+06	1.1541e+06	1.15412e+06	1.14078e+06	1.12476e+06	1.14848e+06	1.13794e+06	1.11813e+06	476745	1.43581e+06	1.04752e+06	1.45753e+06	915914	1.62348e+06	960680	121694	160723	898054	572858	1.10169e+06
354	314.245	313.238	6.59868	1.34038e+06	1.29572e+06	1.2861e+06	1.27323e+06	1.27286e+06	1.27288e+06	1.25522e+06	1.25948e+06	508617	1.58953e+06	1.17319e+06	1.60823e+06	1.02693e+06	1.78707e+06	1.14312e+06	131011	157375	1.03723e+06	632322	1.19943e+06
355	314.246	313.238	8.01325	134467	131016	126368	130577	132508	129932	134631	131422	72781.1	82414.6	70170	92001.2	69538.1	67081.9	92383.7	275781	337977	99860.6	220137	120668
356	316.203	315.196	6.04701	80751.7	78653.9	77856.3	80478	80479.4	77447.5	75991.1	74790.1	2115.1	174532	9451.46	1576.06	1793.58	7311.94	5047.35	109161	183209	3142.77	61015.6	14635.2
357	316.261	315.254	7.14284	809124	798407	796284	797217	794778	780830	787234	785660	212223	917122	627682	797111	544357	705489	720221	111808	142410	711041	434667	717840
358	318.219	317.212	7.43186	825982	813129	792107	807070	804885	795942	784150	806958	471413	706384	461539	534058	518564	689865	921274	977671	1.1091e+06	882797	612315	680960
359	318.219	317.212	8.12101	149247	141322	131253	128385	124290	119634	122743	109687	246988	271901	436889	200094	135282	313981	266151	173704	262177	197350	97945.1	102704
360	320.235	387.215	7.97739	2.70282e+06	2.72956e+06	2.74919e+06	2.6923e+06	2.68396e+06	2.7019e+06	2.71273e+06	2.68132e+06	3.04336e+06	2.54249e+06	2.7626e+06	2.47136e+06	2.45366e+06	3.20786e+06	2.88186e+06	3.04135e+06	3.09505e+06	2.5315e+06	2.4464e+06	2.60887e+06
361	322.154	321.147	5.38393	1.73747e+06	1.7334e+06	1.70749e+06	1.68826e+06	1.7021e+06	1.64454e+06	1.68834e+06	1.67998e+06	1.22794e+06	2.27232e+06	1.55626e+06	1.47544e+06	1.47296e+06	1.28798e+06	1.1866e+06	856500	1.04962e+06	1.46792e+06	1.36134e+06	1.19616e+06
362	322.251	321.243	8.22031	505512	516564	511221	505614	515683	516953	518731	527104	564300	372631	623126	303255	368752	712074	769920	647941	729517	530374	348460	554203
363	322.251	321.243	8.47369	322172	313496	310051	321533	323908	323900	328120	341407	149461	172170	200653	183834	125171	246407	825361	464942	605154	381464	297200	482940
364	323.911	390.891	0.814159	146870	147697	144514	144530	140272	140426	142679	146166	129353	128950	154228	155059	130918	138156	151296	142025	128139	177899	156440	163345
365	326.191	325.184	8.82007	1.59649e+06	1.62017e+06	1.6076e+06	1.57702e+06	1.60106e+06	1.5582e+06	1.56359e+06	1.4911e+06	2.20138e+06	1.07798e+06	1.94039e+06	1.34548e+06	2.24701e+06	1.21016e+06	1.10015e+06	1.26923e+06	1.00949e+06	901975	1.62222e+06	854832
366	326.191	325.184	9.21379	1.176e+06	1.1262e+06	1.12186e+06	1.11231e+06	1.13216e+06	1.07904e+06	1.10612e+06	1.03312e+06	1.55024e+06	763455	1.35802e+06	948851	1.51941e+06	833097	729062	833873	636261	580663	968959	526501
367	326.224	343.227	7.86234	9.47548e+06	9.35187e+06	9.33192e+06	9.36312e+06	9.51405e+06	9.31742e+06	9.33367e+06	9.28398e+06	7.40293e+06	7.69469e+06	6.72709e+06	5.56827e+06	5.58782e+06	5.57726e+06	1.09526e+07	9.64479e+06	1.64609e+07	8.41789e+06	5.62657e+06	6.58343e+06
368	326.224	325.217	9.1766	116650	115650	114645	112899	114435	108677	114428	107738	49992.8	134860	63348.6	167374	121948	327497	100851	57008.2	62163.4	159350	66977.3	51715.4
369	326.282	325.274	8.92194	106806	99573.6	98533.8	101420	104818	95131.1	99230.6	93246.1	43789	99830.2	100609	87769.7	78081.7	95581.8	101954	19534.6	34415.7	86412	256951	165254
370	327.766	326.759	0.883206	230788	229209	229885	225864	222617	229878	224831	227301	218732	241459	212406	246477	154440	256763	211330	263446	253986	140655	255796	211539
371	328.24	327.233	7.22349	614127	621389	614199	612455	604883	612547	608615	587443	763372	537340	881203	649950	527287	960194	740549	449103	536476	475564	736192	735495
372	328.24	327.233	7.36678	526898	544744	540897	533938	532251	547512	535648	512933	661646	473221	783431	585448	476728	850196	652959	410187	489670	412086	656496	659913
373	328.24	327.233	9.65865	7.03914e+06	6.78756e+06	6.74195e+06	6.6352e+06	6.75286e+06	6.64831e+06	6.88278e+06	6.58417e+06	3.55468e+06	7.07002e+06	2.94081e+06	7.12566e+06	6.0916e+06	1.44274e+07	6.4136e+06	4.43102e+06	4.53195e+06	8.20231e+06	5.16602e+06	3.88622e+06
374	328.24	327.233	9.6889	7.01928e+06	6.76864e+06	6.72549e+06	6.6181e+06	6.73491e+06	6.63084e+06	6.86216e+06	6.563e+06	3.55e+06	7.05749e+06	2.93547e+06	7.11081e+06	6.07768e+06	1.43891e+07	6.39174e+06	4.41532e+06	4.51701e+06	8.1722e+06	5.14883e+06	3.87326e+06
375	328.261	327.254	8.51875	43320.9	43309.3	46754.8	40929.2	41602.5	42787.2	42922.4	42624	13670.5	28964.8	17912.6	25461.6	13349.3	15879	27092.3	116513	108888	26582.5	169828	61482.3
376	330.037	329.03	3.44148	90930	84821	86584	91176.5	84714.6	91395.9	84851.1	91396.5	27296.8	149637	31341.4	53787.2	80746.6	27563.4	5985.2	1741.49	498.888	19456.8	7617.94	18506.6
377	330.183	329.175	4.99228	35470.6	35651.5	36901.4	39272.4	43722.3	42370.3	44711.7	42576.9	323.544	7280.64	0	348.624	0	0	13243.7	293559	345137	3427.55	7184.91	1255.36
378	330.24	329.233	4.91176	269181	271145	274734	279255	285716	288830	296637	293723	128041	113498	192341	70797.8	106135	55521	124286	82206.2	77078.9	114995	100133	93767.2
379	330.256	347.259	8.61584	1.57923e+06	1.57431e+06	1.58221e+06	1.55815e+06	1.58737e+06	1.59112e+06	1.60698e+06	1.59105e+06	1.39423e+06	1.19354e+06	1.6815e+06	1.03297e+06	920062	1.16519e+06	1.73716e+06	1.76819e+06	3.54168e+06	1.38697e+06	889192	1.15971e+06
380	330.255	329.248	10.0796	175388	171425	170983	158125	170978	172135	171108	164272	83636.9	199064	122243	233776	218518	386785	148978	67118.3	62145	223584	122821	131781
381	330.256	329.248	10.3774	886433	877031	859540	817713	874350	837038	842836	784468	615205	888136	689943	1.94674e+06	936299	2.81989e+06	1.09654e+06	527944	545906	1.77717e+06	806905	557654
382	331.145	330.138	5.20877	550222	540064	536675	540535	553646	546642	550171	561107	327034	1.30768e+06	379572	940135	962078	141291	721326	304926	165827	804871	898630	577579
383	332.198	331.191	4.48177	11985.6	9154.15	9202.32	12533.9	11777.1	9308.99	10855.6	12384.4	682.128	24489	0	356.064	0	0	11519.5	172320	202936	390.447	16127	639.864
384	332.198	331.191	5.00201	676363	684607	683281	669438	686604	701000	707806	707430	51211.5	1.7198e+06	84838.3	61961.4	77382.6	34713.3	203359	1.80948e+06	1.71979e+06	83669.1	265655	152968
385	332.271	331.264	10.8007	308699	293177	269512	249273	262076	294687	273400	241384	208035	294938	299138	522944	366789	746569	294725	105601	150290	576348	218101	241319
386	334.214	333.206	4.93925	28643.1	27126.9	28741.6	29484	26944.5	32649	31796.6	31575.9	1152.71	5392.84	0	0	322.944	3017.15	5009.85	223150	220181	424.44	9040.87	2704.69
387	334.214	333.206	5.16853	88061.7	87393.7	82581.5	91089.7	92923	96853.7	92693.6	98620.7	771.753	94835.6	1199.94	323.376	322.944	2622.95	9712.35	606292	706970	722.832	14169.3	4362.87
388	334.214	333.207	7.01145	63515.2	63116.5	68011.7	62275.1	67437	60457.7	69447.5	60449	50813.7	36847	31368	51443.8	35343.8	38376.8	30321.1	141279	237308	40156.5	57467.7	33397
389	334.211	333.204	7.47042	67709.4	65197.9	65290.9	66881.1	63347.3	68165.4	67412.1	66082.1	33127.2	74959.4	19857.8	62497.7	47046.9	18580.4	45617.1	206982	266436	55690.3	51713.9	32992.3
390	336.23	335.222	5.55852	421703	419182	402281	409338	398141	400643	410668	414090	180241	271431	323884	158376	159346	825824	640574	1.21421e+06	778280	529280	76847.7	126963
391	336.23	335.222	7.24013	689866	673158	673010	666214	678451	659434	655580	654422	323745	680506	537615	378045	326815	1.09833e+06	769060	813317	977184	476390	383871	539642
392	336.23	335.223	7.27586	507423	494703	498691	486144	497420	482998	477501	471215	251169	512842	415214	272884	231666	811694	581505	617745	739144	340864	308307	386937
393	337.155	336.148	3.99414	62920.8	61610.1	60146.1	55162.8	53578.2	56149.7	56606.1	58522.2	51554.1	59771.7	52834	27461.5	22933.6	158006	68948.9	401.808	656.181	38076.5	78326.1	104134
394	338.149	337.142	4.00636	102270	104359	95409.2	91843.5	96703.2	92456.5	98342.7	93799.1	81885.7	200871	111549	116311	135276	22599.4	8547.5	867.408	847.608	31103.9	11470.3	48524.7
395	340.24	339.232	9.82305	1.10019e+06	1.03866e+06	1.01463e+06	988152	950855	903810	912032	906612	1.50648e+06	370047	3.0909e+06	122121	1.34879e+06	3.34848e+06	3.38686e+06	162208	785500	1.2719e+06	4.6511e+06	1.56656e+06
396	342.074	341.067	3.88419	40453.5	37563.8	38304.8	40817.5	39749.7	38257.1	36917.1	39057.2	51615.8	37950.9	11068.5	29201.8	6142.39	23857.6	40066.6	173310	128544	36587.4	59713.9	22152.5
397	344.234	411.215	7.86154	1.67086e+06	1.64683e+06	1.65098e+06	1.65572e+06	1.67219e+06	1.65165e+06	1.65896e+06	1.6416e+06	1.47803e+06	1.51297e+06	1.30571e+06	1.15323e+06	1.17571e+06	1.0918e+06	1.80865e+06	1.75882e+06	2.42664e+06	1.53801e+06	1.14068e+06	1.28962e+06
398	345.16	344.153	5.47271	1.83384e+06	1.79156e+06	1.75196e+06	1.72481e+06	1.71847e+06	1.71815e+06	1.68055e+06	1.6866e+06	2.65055e+06	2.55725e+06	2.52873e+06	1.93386e+06	3.71685e+06	1.57138e+06	1.76323e+06	1.00553e+06	930463	2.76533e+06	2.35434e+06	2.61619e+06
399	346.214	345.206	5.33126	42812.3	43897.4	47275.3	40410.3	41746.8	45583.3	47683.8	49622	0	0	0	0	0	305.376	20026.2	227057	298123	920.058	23528.6	689.712
400	346.25	345.243	8.09129	715323	739129	726229	727112	737390	723959	734281	734893	790747	560435	822603	391792	451023	507251	691609	669200	1.12349e+06	498955	406453	472651
401	346.25	345.243	8.38438	1.38268e+06	1.39701e+06	1.38862e+06	1.36902e+06	1.40424e+06	1.37505e+06	1.38146e+06	1.38743e+06	1.14438e+06	829555	1.17269e+06	1.05309e+06	623313	1.58805e+06	1.73565e+06	1.36336e+06	2.63072e+06	1.32225e+06	925270	1.07018e+06
402	346.271	345.264	6.86183	130734	128800	124602	120034	124622	117094	117909	114820	114187	147365	128837	77892.6	93977.9	55947.4	26664.8	33865.7	60306.8	80033.6	383151	105533
403	347.134	346.127	3.85491	61386.9	57730	55446.1	52585.2	53455.8	53640.3	56026.9	52904.7	64499.5	102406	39021.4	29682.5	33926.8	36082.7	22548	85268.3	57803.6	36494.8	36286.9	39944.8
404	347.176	346.169	5.24177	65729.2	67449.4	65948.1	65150.7	64013.8	67738.7	68208.1	65374.7	18960.2	41550.4	12206.8	20446.9	14088.8	33942.5	86005.5	193121	142996	91233.9	137994	51967.2
405	348.193	347.186	4.37092	41288	37779	43390.2	42701.8	40051.4	41694.4	44629.6	41960.8	4176.82	177302	5350.04	2147.38	6464.27	4944.91	878.04	35387.6	41299.4	2363.9	17310	18789.8
406	348.266	415.246	8.61845	319419	319040	317440	318393	324636	320003	330373	316131	305569	257393	355525	219976	211079	238073	353752	362745	707646	284211	194003	244672
407	349.094	348.087	3.73306	406545	371507	372967	352570	354060	347797	334883	335207	854091	164657	735205	43859.9	78362.5	1.37986e+06	586554	216457	86676.9	97711.4	751206	407223
408	350.067	485.034	0.788628	70484.1	68770.1	71666.1	74721.2	69883.2	69038.8	68525.8	70976.7	74728.6	47158.4	51693.3	55174.3	48210.7	45098.4	57334.1	164891	139141	54946.9	73810.7	52636.2
409	350.245	349.238	5.80335	42143.1	39177.8	42001.8	43679.3	39891.7	45463.6	42468	42891.9	1443.76	13498.7	0	0	339.624	3938.9	37759.2	208770	209153	16420	48637.1	13062.8
410	351.217	350.209	5.81306	341503	334927	336035	322849	336037	340309	338921	332714	247950	468079	316857	267620	360644	178393	152457	342108	239775	158165	233074	243037
411	352.076	351.068	3.69154	89637	87831.9	87564.6	85995.2	84744.8	80690.9	81754	79384.7	128736	87982.1	123436	38907.6	58043.5	255765	79058.1	19773.6	12715.3	68682	92219.7	45779.6
412	354.149	353.142	9.81783	141732	142763	140969	129643	146670	134658	145712	145063	47941	92905.1	64824.7	81314.4	86667.2	57527.8	534413	99266.5	87022.2	420935	271904	547739
413	354.171	353.163	10.8105	183274	167765	149486	148776	156814	152734	147478	130368	258383	281992	279386	274830	273899	250176	199104	105313	103211	143392	114285	138687
414	354.219	353.212	8.67168	392235	395209	371398	370113	381907	379137	376631	383825	255722	197166	488189	104089	127306	681596	474693	240840	747788	289494	906352	159429
415	354.24	353.233	5.46711	587456	588466	575198	570233	565408	570459	569128	569664	414146	456627	547166	236548	307678	1.10676e+06	542755	538922	586929	508390	319411	354823
416	354.24	353.233	5.84844	714159	714131	688409	693888	697867	691134	693810	695550	697484	641865	866340	238537	639216	620295	638755	717055	579119	893502	376119	431878
417	356.165	355.158	10.813	3.91278e+06	3.65506e+06	3.25066e+06	3.06596e+06	3.37661e+06	3.29479e+06	3.24512e+06	2.76817e+06	5.48215e+06	5.99361e+06	6.0039e+06	5.78635e+06	5.87965e+06	5.47185e+06	4.1485e+06	2.31517e+06	2.18143e+06	3.08406e+06	2.43242e+06	2.90483e+06
418	356.271	355.264	10.4432	83975.8	80991	79068.3	73509.3	79381.1	74776.5	78491.8	71852.1	94196.9	80722.5	113240	187486	124157	180133	97474.1	78974.7	98563.8	259675	67834.2	56388.2
419	360.131	359.124	3.79015	110400	123784	121351	117356	119390	119474	122067	123346	64445.8	40995.2	92513	8584.26	42756.1	69357.9	29663.4	21735.8	22540.5	39849.1	73624.3	83009.3
420	360.131	359.124	3.98991	159719	163063	162724	161521	166134	168767	166797	172379	101163	95597.6	110807	35610.7	86131.6	61484.1	41516.7	31305.4	52884.2	69791.4	74898.8	103557
421	360.196	359.189	5.42022	892882	873984	862600	856481	877636	869381	881247	895134	388996	342757	847657	246953	383297	406393	1.60374e+06	1.64253e+06	1.80431e+06	1.06872e+06	2.19683e+06	1.62258e+06
422	362.209	361.202	4.62451	671486	678006	669420	675402	677293	692104	699186	717973	195191	97918.9	124286	66715	108991	291259	1.87344e+06	2.0048e+06	1.3649e+06	391580	2.02815e+06	785340
423	362.245	361.238	6.71707	209953	209443	217281	208653	209670	201965	202988	209756	161953	206751	137090	231445	222710	273725	198270	158664	179534	210108	138327	160577
424	363.244	362.236	8.99681	194624	192489	192262	187696	186580	190386	186528	176272	253578	191592	191215	155305	156590	163040	276175	89150.8	101354	170945	239398	443048
425	363.948	362.94	0.783125	77443.5	76013.7	74182.9	70154.8	72906.7	74053.8	72798.8	74604.8	138090	93536.8	115526	101931	107559	72533.1	101017	28639.7	54147.7	89431.8	44397.3	56582.6
426	364.224	363.217	4.89671	411496	415230	418405	411383	430002	441363	454571	449479	57550	47663	29973.7	4211.82	14456.3	112861	182966	2.43405e+06	2.84699e+06	40448.4	309674	137663
427	365.232	364.225	6.2857	302253	294843	302996	290797	305174	299056	299310	312525	240638	429015	272151	247373	263161	138128	121485	289621	213007	127505	208198	201556
428	366.24	365.233	4.02397	20251.7	21457.7	20634.5	18162.8	23223.9	24390.9	24352.6	21600.9	1498.34	377.976	0	0	0	1620.53	17465.7	323087	155413	0	53956.7	6969.52
429	366.24	365.233	4.57979	450157	445118	452513	453412	466244	474668	481385	489024	117292	34176.1	83839.4	5817.9	21037.3	195069	553531	5.86196e+06	4.12684e+06	135662	789615	317073
430	366.24	365.233	4.78192	450514	444329	451398	453378	464694	473439	480579	488285	118033	33887.1	84501.3	5817.9	21037.3	195400	552007	5.80763e+06	4.09199e+06	135662	786890	316186
431	367.179	366.171	5.38298	103510	103464	101264	100169	100950	95570.4	101061	101560	113155	148029	111421	84179.3	124085	77142	117784	66645.9	64836	111714	146112	96109.1
432	368.112	367.105	0.883616	149582	138445	134748	135618	133508	125030	117032	116059	218582	190221	213889	209183	228783	414937	229684	65858.6	149097	164023	198315	112438
433	369.194	368.187	5.79246	134932	130743	132927	124748	126045	124530	123373	126993	126562	192248	127967	95076.6	121757	86529.9	168340	57129.7	66748.3	151773	218838	183486
434	369.323	368.316	10.6619	181399	175873	169502	172487	180953	179598	181625	172462	108942	185251	139284	204544	124246	131018	221370	190637	193827	325321	186432	307983
435	370.235	369.228	4.7554	657020	662207	651149	640833	661614	654922	671662	666800	467651	556517	540107	597614	422897	907509	687155	874900	1.17509e+06	690919	288463	504256
436	370.235	369.227	4.9006	534706	538449	532296	518599	534817	535495	546070	542550	387677	438638	449155	488574	324604	720132	579728	698405	966713	533666	239210	433110
437	372.214	371.207	5.74569	149720	144038	145214	134818	137844	134953	140149	138078	85126.8	281785	102123	18948.8	68464.4	247712	0	0	319.8	25040.4	28100.8	46807.6
438	373.192	372.184	5.38179	259569	252750	235726	224054	224082	212318	216707	206878	1.20616e+06	18253.2	866947	15034.9	32105.7	1.37175e+06	109115	19528.9	13816.4	13250.6	254226	351364
439	374.303	373.295	7.92755	46649.5	43379	41528.1	43396.1	36369.4	41040.1	37177.2	37932.3	41072	56583.5	43676.3	26618.9	30371.1	16863.7	8666.1	10617.1	22196.9	17227.5	165627	46755.4
440	375.139	374.132	10.8073	168284	164862	141624	134756	151401	153846	149207	116784	127021	264620	273583	247492	284786	376679	248768	29446.5	21047	170651	63681.1	150635
441	375.207	374.2	5.83097	114334	115468	110515	99516.2	105898	96619.4	95017.1	89783.1	754956	15505.5	579028	9525.79	23117.5	620608	19153.3	350.376	0	1692.67	69697.6	124823
442	375.252	374.244	6.14639	1.29609e+06	1.27481e+06	1.2828e+06	1.26162e+06	1.28284e+06	1.26317e+06	1.2756e+06	1.27325e+06	1.86807e+06	931861	948067	895266	881674	1.80813e+06	904599	1.48153e+06	847587	955044	1.38753e+06	1.67344e+06
443	376.297	375.29	9.36434	67134.8	67451.6	65438.6	62230.3	64636.8	62121	67896.9	61036.4	77262.7	52284.6	85192.5	29175.9	27894.5	34955.5	75819.6	94859.1	230472	59083.6	32178.8	38408.5
444	377.232	376.225	6.12379	859336	867147	861504	854155	875378	852878	851498	869486	672000	949542	776752	763083	796818	492869	592652	1.12231e+06	949813	754627	804704	789501
445	378.204	377.196	4.03004	135048	139261	140358	131823	137010	139116	137558	146033	64556.9	5934.67	47245.5	401.592	2252.78	138688	646087	79685.6	115739	12607.6	262738	74351.6
446	378.24	377.232	5.50436	220152	211409	213786	209746	213177	211837	215373	218477	154667	152355	198600	67034.1	100181	92896.1	217885	257488	385168	181597	149385	133434
447	378.276	377.269	6.20248	21323	20958.9	22477.6	20153.1	22626.7	21340.8	21911.3	23627	2307.46	4999.88	1302.7	0	0	359.496	8259.3	154074	133138	11574.4	31135.2	30820.3
448	378.274	377.267	12.1903	119416	118881	124975	112565	107236	135326	151122	163897	49826.5	91259.3	74486.3	74404.2	77011.6	94651.6	140824	63636.2	69640.1	149767	392235	245496
449	379.248	378.24	6.79278	6.7322e+06	6.87656e+06	6.86994e+06	6.80328e+06	6.85277e+06	6.72443e+06	6.73486e+06	6.68295e+06	7.79794e+06	7.56327e+06	7.44383e+06	6.94133e+06	7.02791e+06	3.79765e+06	4.83897e+06	8.98652e+06	8.15329e+06	6.28868e+06	6.70875e+06	6.0221e+06
450	380.069	379.061	4.07532	184609	187193	186377	191093	201810	198360	204720	205312	92753.3	181809	83261.2	135839	342527	795.54	64742	495638	1.00242e+06	319844	42332.2	91766
451	380.165	379.158	10.1087	2.43541e+06	2.28477e+06	2.24063e+06	1.95209e+06	2.19891e+06	2.13121e+06	2.03372e+06	1.84734e+06	1.67843e+06	2.19457e+06	2.42373e+06	2.22552e+06	2.76846e+06	3.71689e+06	2.70091e+06	1.1884e+06	831850	1.93726e+06	1.91999e+06	1.95046e+06
452	380.186	379.179	11.0204	248841	250675	228162	223263	227465	229115	209263	172078	192302	413198	415746	405877	419371	354349	301577	140705	114460	228711	154350	218059
453	380.219	379.212	4.08372	80979.7	79664.3	78641.1	73733.5	78050	78373	79712.9	74973.8	97875.7	9552.5	80991.7	2244.36	5260.03	214171	69363.6	1.15235e+06	876330	19242.7	137432	109649
454	381.264	380.256	7.04236	3.30518e+06	3.36972e+06	3.36999e+06	3.37739e+06	3.37129e+06	3.29623e+06	3.34465e+06	3.26028e+06	3.10033e+06	3.37858e+06	3.46506e+06	3.08418e+06	3.39545e+06	1.28764e+06	2.47666e+06	5.82321e+06	5.1096e+06	3.34063e+06	4.03782e+06	2.94617e+06
455	382.066	381.058	4.07576	115109	116336	121681	113883	120674	124611	128401	131927	59677.4	117400	52688	81566.7	220607	470.808	38151.3	319722	633093	199234	30060.3	56092
456	382.18	381.173	11.0179	5.23652e+06	5.24959e+06	4.67268e+06	4.57416e+06	4.82618e+06	4.66779e+06	4.46435e+06	3.66651e+06	4.07657e+06	8.66373e+06	8.55688e+06	8.29866e+06	8.5797e+06	7.28913e+06	6.38543e+06	2.96085e+06	2.39463e+06	4.80936e+06	3.31459e+06	4.41842e+06
457	382.202	381.195	12.0494	165224	161201	138561	137764	150368	128706	102253	92387.7	322255	298720	435439	399186	320770	459684	99426.5	23823.5	30343.7	108678	81476.7	111478
458	383.282	382.275	6.00623	0	0	0	0	0	0	0	0	687.168	0	460.848	0	0	387.624	4219.19	0	192558	0	2202.72	0
459	384.196	383.189	12.0478	3.50324e+06	3.40367e+06	2.9001e+06	2.95438e+06	3.22577e+06	2.61455e+06	2.16591e+06	1.97169e+06	6.78551e+06	6.18462e+06	9.05402e+06	8.24488e+06	6.66386e+06	9.45909e+06	2.10141e+06	540818	645992	2.3025e+06	1.78396e+06	2.34747e+06
460	385.941	520.909	17.1088	442632	411968	430031	410398	390349	367413	324733	331476	910941	874799	827716	805715	801963	580176	466195	462580	484391	354834	373708	352577
461	386.097	385.09	3.35091	43137.2	45382.6	44541.5	41853.1	44612.8	43872.9	44260.2	44278.3	79085.7	29873.3	28259.4	37144	40604.1	20080	21820.2	178090	137624	36059.6	29582.5	18179.9
462	386.203	385.196	12.045	96918.7	89893.1	80134.3	79882.5	88801.4	68174.3	58158.4	53190.2	195509	176672	261837	252835	196655	275581	54290.2	10181	14871.6	59194.9	43261.3	62046.1
463	386.23	385.222	6.39424	753133	741504	718309	694034	691403	685950	673264	669874	490913	1.1422e+06	655506	188584	564688	1.81832e+06	96917.2	3874.6	1626.62	378564	410103	490133
464	387.207	386.2	6.93354	63129.8	57756.2	61209.4	58584.4	58820.2	57598.4	57870	58567.2	7563.05	10423.2	3551.9	4753.21	6583.56	13465.3	268554	73343.2	68031	33964.7	195665	16707.7
465	388.222	387.215	7.94891	2.70282e+06	2.73049e+06	2.74952e+06	2.6923e+06	2.68396e+06	2.7019e+06	2.71273e+06	2.68171e+06	3.04336e+06	2.54249e+06	2.7626e+06	2.47211e+06	2.45366e+06	3.20786e+06	2.8822e+06	3.0417e+06	3.09571e+06	2.5315e+06	2.4464e+06	2.60887e+06
466	388.222	387.215	7.99706	2.58818e+06	2.60545e+06	2.61968e+06	2.56537e+06	2.56104e+06	2.57698e+06	2.58071e+06	2.55363e+06	2.97054e+06	2.49036e+06	2.707e+06	2.43287e+06	2.40129e+06	3.07911e+06	2.78332e+06	2.91949e+06	2.9411e+06	2.45252e+06	2.39341e+06	2.53872e+06
467	388.245	387.238	4.23423	161675	161393	164499	159135	162805	176451	173555	179141	176477	326834	161308	261250	294274	74410.3	139285	580448	729683	454918	66117.1	97042.5
468	389.223	388.215	6.38851	44322.4	38211.7	41429	37850.6	37955.2	41229.7	34513.5	32580	267052	880.68	212407	910.008	2533.97	225503	7671.16	0	0	0	56021.5	68313
469	389.259	388.252	9.56113	331504	329009	318645	308341	319105	317755	314574	307119	436409	300224	288118	214180	209539	316979	531762	174173	190560	288214	548607	750114
470	391.898	526.865	0.813672	101300	106866	102319	96190.1	104498	100044	101339	102121	95189.3	97378.4	107763	115148	91819.8	101294	103220	91263.6	85835	119921	110524	106732
471	392.219	391.212	4.9636	519267	524425	529788	514922	526888	523971	532083	532239	696051	707702	445256	424264	450369	166529	561902	847335	900980	734359	425609	586988
472	392.292	391.284	5.73223	76640.1	81025.6	82212.9	78820.2	74683.1	72159.9	79545.9	71482.2	208386	21163.1	68729.7	1058.14	2037.74	97206.3	62085.8	84497	189932	35807.5	279612	190897
473	392.292	391.285	6.79501	529176	508680	496060	481533	481923	465896	452390	449924	2.97672e+06	267128	208216	104042	98756.9	525312	139943	654427	705000	116812	1.79098e+06	1.05269e+06
474	394.235	393.227	4.50501	50204.1	50246.9	48712.7	53549.5	52593.3	51764.9	52717.4	57457	39890.3	177503	48124.5	76674.6	108412	7712.61	44199.1	319843	310111	122824	24072.8	48911.8
475	394.271	393.264	4.67544	60859.3	59066	63296.3	58187.4	61998.5	70176.9	63610.9	65665.3	6598.04	0	7562.85	0	307.728	15011.7	164673	539124	315154	21075.9	86950	45915.6
476	395.339	394.332	10.8911	193620	187429	180955	176346	180143	189582	190674	181761	64409	210539	133222	241889	120243	127793	274946	172334	159582	319931	185277	335976
477	397.191	396.184	5.4996	40254.9	36893.2	37773.6	35551.8	33877.7	29693.3	29841.2	30051.4	187830	0	109728	396.168	2579.35	296777	7546.45	0	437.994	0	25772.5	53899.5
478	399.139	398.131	10.1131	83938.1	87985.2	78093.1	79994.3	74725.1	76502.8	81825.3	63897.1	18876.1	81144.6	86544.6	83152.3	132867	303083	127610	6372.59	2825.47	56856.2	47769.4	57018.3
479	399.207	398.2	5.89376	164573	154333	146242	137296	137656	130387	128751	125451	832111	2008.61	523037	2441.66	13409.4	1.06662e+06	33820	0	528.6	607.122	110577	151448
480	401.154	400.147	11.0159	174701	162905	140513	137981	161926	170794	150663	113627	38964.3	299227	235182	259626	279974	237220	279327	20764	13280.1	157696	49919.8	148123
481	401.223	400.215	6.32913	483617	447265	431227	414269	409169	379842	374288	370714	1.95717e+06	25980.7	1.2504e+06	5255.24	45353.4	2.8504e+06	258375	0	496.8	20311.5	751800	629947
482	402.224	401.217	4.9944	64760.4	64561.4	62850.1	66174.2	63082.7	63816.3	67953.9	65665	12031.3	5929.55	7337.09	2063.06	3273.1	24150.8	291915	29072.7	14179.1	27041.4	161043	31020.5
483	403.239	402.231	7.00931	112523	105198	100131	95340.2	96573.7	88842.6	85355.5	84121.4	702572	7772.15	497382	1037.47	12009.9	621836	31981.7	526.932	0	1160.02	126244	122985
484	403.308	402.301	10.5889	199051	210788	199231	188438	203173	203134	206549	194599	170840	250978	254667	365838	233153	280074	346204	109137	120595	401261	160344	320697
485	404.165	403.158	9.91709	654408	645461	617617	583239	593484	585661	563316	594177	151430	309204	176842	440674	382691	2.06091e+06	448352	165377	147518	608017	489491	330139
486	404.255	403.248	4.91296	94247.3	96252.2	89865.7	87624.5	88922.6	86970.8	94394.2	99171.2	35923	0	47313.4	0	0	104761	412369	0	0	0	228066	150393
487	405.199	404.192	3.73759	423328	419882	419685	404359	405997	403800	392580	397976	308693	718733	258234	317190	589014	740441	128252	30057.1	26537.8	392721	155226	173797
488	406.036	405.028	1.2172	39831.2	41923.7	39825.1	38590.3	36661.5	35955.2	35352.8	36377	168612	45672	53292.5	21213.9	57319.5	19172.9	70644.5	12840.7	31155.5	47112.4	46015.3	74569.3
489	406.271	405.264	5.09944	278037	274395	265717	269803	269457	264941	268821	263855	148860	1798.37	178954	1788.46	0	289695	968710	86274.2	32601.5	4245.59	1.01861e+06	496051
490	406.271	405.264	5.4876	240853	229131	231800	225142	224126	219912	226921	218610	499661	13155.8	252881	2001.67	4285.76	361465	301736	179457	468139	81023.4	866108	452011
491	408.129	407.122	3.36117	156536	157042	159742	154205	160772	155979	158201	158460	250894	153004	144456	140618	158415	92756.4	117224	365011	345111	161920	134682	95567.5
492	408.287	407.279	4.92918	2.11747e+06	2.07976e+06	2.09322e+06	2.02613e+06	2.03873e+06	2.04729e+06	2.02056e+06	2.03553e+06	2.28416e+06	81684.9	1.75109e+06	23872	24603.9	3.27941e+06	5.85958e+06	1.27693e+06	823335	336585	5.30493e+06	3.40227e+06
493	408.286	407.279	5.14485	3.64596e+06	3.54132e+06	3.54109e+06	3.50005e+06	3.52238e+06	3.5176e+06	3.51317e+06	3.53355e+06	2.49025e+06	57107.6	3.01833e+06	31042.7	50228	1.89772e+06	1.00957e+07	1.21058e+06	2.47039e+06	512901	9.04257e+06	5.8914e+06
494	408.287	407.279	5.55238	5.08021e+06	4.86287e+06	4.72641e+06	4.62433e+06	4.57103e+06	4.52728e+06	4.4662e+06	4.4445e+06	5.82205e+06	65191.9	2.54845e+06	10459.6	4301.27	6.3031e+06	1.02089e+07	1.37536e+06	802616	388551	2.07244e+07	7.83758e+06
495	409.097	408.09	3.61981	272105	259203	267109	263053	260861	244320	244995	247917	318857	401388	543831	76720.5	335322	420746	6047.25	13075.7	8952.73	258507	80466.3	225492
496	409.29	408.283	4.9261	1.44873e+06	1.44655e+06	1.42188e+06	1.40066e+06	1.40839e+06	1.40371e+06	1.40964e+06	1.41973e+06	1.22742e+06	33201.2	1.20043e+06	10081.3	13757.9	1.3202e+06	4.11153e+06	626204	830981	215187	3.74373e+06	2.34482e+06
497	410.211	409.204	12.1913	176161	173071	166084	159342	158404	169442	182328	187790	112072	228614	192052	173687	182623	201222	169656	85183.9	96487.5	178646	499177	281969
498	410.23	409.222	3.9903	54845.5	60065.8	57819.8	56711	57860.4	55159.8	58411.2	57801.5	23483.9	50041.2	22755.9	22617	31962.9	18192.5	88619.8	298277	300051	65308.9	82941	48050.1
499	414.188	413.181	5.59507	24411.7	24817.4	20562.5	22363.3	21556.9	19187.4	19896.3	20376.8	25490.7	6378.52	21590.4	664.152	0	138487	10240.6	9577.61	5804.32	7570.87	42323	18645.1
500	414.313	413.305	9.50965	144965	145306	137774	139567	141557	142595	144206	147443	99271.5	75658.1	63888.8	28492.4	43124.1	52651.2	161716	552530	562199	95323.4	279599	71379.6
501	416.204	415.196	4.54679	113914	107262	107898	116967	109781	99551.7	104552	111072	45840.3	803347	33883.4	287635	185002	54851.5	33385.5	109959	97065.8	154959	66832.6	90088.9
502	416.328	415.321	10.0475	77608.8	76068.5	80215.2	75867.2	80453.4	79559.7	84895.1	77345.6	30106.3	52063.5	35047.6	24035.9	22235.1	51528.9	73864.7	326939	270094	46318.6	186126	56867
503	419.215	418.207	3.78716	89411.7	84927.1	86751.2	81324.9	84435.2	83283.4	83412.6	85159.2	17193.2	217496	11524.6	45011.7	29870.7	125611	360.264	2560.27	382.032	17535.8	11700.6	1904.27
504	419.233	418.226	4.99559	45526.9	44748.9	45437.3	45324.8	44317.5	45320.4	39559.1	42724.2	31749.6	640.464	29161.8	0	0	68806.8	110473	365.376	1077.09	1238.83	156674	76562.3
505	422.058	421.051	3.43823	830924	816626	798252	805846	835794	810404	788529	776927	780469	777194	905016	956049	874555	901705	980359	605167	626168	899949	935463	898078
506	422.193	421.186	4.4418	107429	111811	117953	117843	122644	122909	123326	128392	2369.15	989305	2760.99	0	0	6199.73	11597.9	347.76	9710.98	292000	12537.5	2739.5
507	422.266	421.259	4.66983	67938.3	68782.2	67453.7	67027.5	73535.6	67762.9	70920.2	70603.9	92483.5	0	47998.3	0	0	80450.4	305033	1823.94	0	0	159990	100055
508	422.266	421.259	5.3241	70582.2	67514.8	66815.9	62100.6	57479.7	57346.5	61126	58142.9	67861.7	0	86350.1	0	0	238705	99052.4	391.632	0	0	310424	168215
509	423.207	422.2	6.04574	62370.5	63945.2	63243	60686.7	57192.2	56897.8	55652.9	52007.3	214793	769.968	120332	301.752	382.752	487379	42441.8	384.21	0	806.4	86023.9	61117.3
510	424.282	423.275	4.31119	114934	114253	115038	114597	115072	121240	120232	126195	44893.9	0	34845.7	0	0	43519.2	390165	5567.69	12415.1	0	181308	128864
511	424.282	423.275	4.42119	90374.6	88840.6	86365.2	85934.6	90078.7	90583.1	90741.5	98492.4	36355.5	0	26517.7	0	0	33508.1	305130	3413.28	8890.49	0	127018	93929
512	425.111	424.104	3.3848	246135	243769	240377	233723	244128	232774	229176	229057	232670	224541	223950	229719	231715	215367	230316	225713	235860	241919	255028	214992
513	427.202	426.195	4.60775	39897.9	31153.1	28982.8	29047.9	28522	24070.8	22624.5	23517.5	57502.7	0	44375.4	0	0	213750	76879.7	0	0	0	88796.6	46408.9
514	428.165	427.158	9.69482	186850	187487	177095	173903	180089	168998	183949	171156	77716.2	166827	90623.1	179574	154489	332966	155561	105163	113132	213811	121015	97530
515	429.323	428.316	10.8057	283307	278625	258066	250431	274023	270533	276823	249512	107990	365190	301962	522222	275183	388584	522783	101626	103734	583394	189810	499385
516	430.308	429.3	7.42762	132728	125565	130667	133231	130833	124767	127211	128033	73794.5	268220	50893.4	114126	60070.9	103704	28997.5	49399	45481.3	45977	45766.5	43300.7
517	433.228	432.221	8.33787	126255	123716	120446	112485	112795	110979	111442	105236	161920	42548.5	81265.7	22976.9	50270.7	530909	104619	17742.9	69948.2	16879.1	216333	85525.7
518	434.242	433.235	8.91468	6.45954e+06	6.72684e+06	6.76347e+06	6.67317e+06	6.70359e+06	6.58219e+06	6.5772e+06	6.21546e+06	1.20423e+07	6.32234e+06	1.13089e+07	6.52792e+06	5.68859e+06	4.47712e+06	4.44206e+06	6.78513e+06	3.21259e+06	4.42028e+06	9.39605e+06	7.22912e+06
519	434.243	433.235	9.08745	6.21327e+06	6.47867e+06	6.49623e+06	6.40224e+06	6.42848e+06	6.30891e+06	6.30314e+06	5.9509e+06	1.12914e+07	5.87509e+06	1.06852e+07	6.13586e+06	5.32872e+06	4.16555e+06	4.1044e+06	6.36924e+06	2.96186e+06	4.15502e+06	8.91041e+06	6.80878e+06
520	435.246	434.238	9.30714	1.76359e+06	1.79751e+06	1.80037e+06	1.76339e+06	1.76075e+06	1.72483e+06	1.72056e+06	1.61802e+06	3.19003e+06	1.54264e+06	2.83059e+06	1.57619e+06	1.3755e+06	2.68275e+06	1.32207e+06	1.59984e+06	789938	1.07663e+06	2.82536e+06	1.93802e+06
521	437.259	436.252	9.24154	57401	54965.6	52972	55324.4	52989.3	52582.8	47472.3	49759.4	59867.3	14526.9	39507.7	20386	5577.64	370393	63991.4	1081.37	7829.57	9781.59	167006	40725.5
522	437.29	436.283	8.2089	1.72056e+06	1.75149e+06	1.75473e+06	1.72884e+06	1.75568e+06	1.77692e+06	1.81187e+06	1.79748e+06	1.44507e+06	1.46476e+06	1.33347e+06	1.27633e+06	1.2856e+06	1.4053e+06	1.75764e+06	1.74586e+06	2.41422e+06	1.25532e+06	1.31778e+06	1.27774e+06
523	439.306	438.299	8.21613	386832	388900	394192	403353	401263	394648	403759	403013	189779	455153	164128	268302	289956	236248	229908	250561	228426	156832	387497	231925
524	442.183	441.176	4.73083	30922.4	31632.7	27130	28090.6	25450.4	21988.5	25180.3	25456.8	110727	6319.03	83676	1477.06	2165.69	163819	0	316.824	0	0	0	343.68
525	443.901	510.881	0.826556	40765.8	41455.6	43727.3	40568.9	46729.3	48646.4	46428	44448.4	48750.3	48266.9	41060.4	53004.8	36625.6	50504.4	41671.5	41279.4	41532.6	29381.1	46247.4	40675.6
526	446.302	445.295	6.0614	107072	107523	109305	105831	105933	107405	101397	102709	56372.8	164431	44327.9	56992.2	29680.9	111880	10838.3	15445.2	21055.4	9920.53	31300.7	19107.3
527	448.318	447.311	7.0743	64338.6	63475.9	63669.2	61873.3	59758.6	54974.9	55510.7	57196.3	116099	2688.82	121484	0	1091.47	257343	168429	4231.61	1613.62	2188.02	173935	81647.1
528	450.333	449.326	6.16085	63123.9	65295.7	61646.4	65450.5	63973	64827.7	61046.3	58355.8	53871.3	27490.4	48811.7	5456.14	4270.53	100353	85987.2	231291	125166	86960.2	139912	81158.5
529	451.238	450.231	6.95298	81301.6	71505	68968.6	68965.6	75542.4	70934	69788.1	65776.6	264922	18197.7	122873	4035.4	6392.6	202477	106570	14417	71087.1	27978	195661	97664.3
530	451.269	450.262	7.08719	166728	156543	156230	151339	155003	147350	151774	153008	91287.2	122883	93966.5	110735	106591	67072.1	230509	230865	177112	318837	226568	311773
531	451.308	450.301	9.89598	35032.6	35022.2	37012.9	31709.9	34057	31418.6	33132.6	30219.1	8002.91	16877.4	8867.06	40525.7	20987.8	231043	26410.1	14501.6	17348.3	54115.9	21359.8	22348.2
532	453.285	452.277	7.00017	971916	936002	934726	893704	914281	893494	916980	874522	527247	1.07972e+06	656772	1.00576e+06	933511	497539	1.26885e+06	778662	716473	1.49529e+06	907597	1.26754e+06
533	453.285	452.278	7.87814	6.23978e+06	6.05452e+06	5.96412e+06	5.95824e+06	5.93996e+06	5.8791e+06	5.77432e+06	5.67566e+06	4.56217e+06	6.88442e+06	6.16713e+06	8.41039e+06	6.94647e+06	8.93652e+06	6.78796e+06	6.17194e+06	5.81621e+06	5.84814e+06	5.8977e+06	4.83639e+06
534	456.108	455.101	3.92237	45279.5	44377.9	42694.3	41192.8	39576.5	41876.2	38535.5	37904.8	145320	0	142478	0	378.552	294953	66994.3	0	0	0	94115	33175
535	458.243	457.235	8.7506	3.38686e+06	3.46669e+06	3.52007e+06	3.47333e+06	3.4837e+06	3.44846e+06	3.40141e+06	3.28291e+06	6.22726e+06	3.07091e+06	5.23476e+06	4.03658e+06	2.60665e+06	3.52375e+06	2.71719e+06	4.68167e+06	2.76047e+06	2.35282e+06	4.87343e+06	4.52425e+06
536	458.243	457.235	8.86556	3.11511e+06	3.18348e+06	3.25451e+06	3.20425e+06	3.19984e+06	3.16829e+06	3.12238e+06	3.01014e+06	5.39267e+06	2.6737e+06	4.66353e+06	3.65276e+06	2.34192e+06	3.115e+06	2.36679e+06	4.19183e+06	2.35226e+06	2.12973e+06	4.39373e+06	4.03769e+06
537	458.243	457.236	9.14276	887768	830574	826714	811065	812489	781197	787528	749224	3.56184e+06	1.58982e+06	2.4943e+06	1.81831e+06	1.10913e+06	1.4195e+06	981716	1.65012e+06	908302	823152	1.55886e+06	1.41307e+06
538	463.306	462.298	8.46586	939930	945774	938244	921552	950100	940645	935437	917319	961809	840341	1.0002e+06	806469	880958	732010	1.0257e+06	1.27957e+06	1.70567e+06	748185	611899	691004
539	464.295	463.288	14.1875	304616	295648	290194	283577	281900	275476	268594	267513	193221	319307	230994	200703	237221	168263	235206	681357	570413	271138	460088	391302
540	464.313	463.305	5.36378	226007	219496	223839	217534	206082	209523	204134	208042	200747	0	244090	0	0	566993	583506	21343.1	37321.6	948.888	862296	203376
541	464.313	463.306	6.0029	58604.2	55451.2	50580.6	54089.8	50296.6	48238.4	42773.3	45231.2	105551	0	109070	0	0	299041	67159.6	0	0	0	176287	39110.6
542	465.308	464.301	4.39396	162390	156302	154371	154073	150033	152515	160324	153314	23991.3	0	29193.1	0	0	38284.9	456187	4685.91	5339.96	482.736	551509	354740
543	465.308	464.301	4.53617	157070	144410	143834	140507	141407	141471	146808	145917	22829	0	27967.9	0	0	40355.9	445384	4685.91	5339.96	482.736	543970	354968
544	465.308	464.301	4.90129	715259	684185	667226	645761	634429	600173	590878	595850	110998	0	169362	0	0	980318	857302	10728.7	12561	0	4.84236e+06	1.77213e+06
545	465.321	464.314	8.66597	669202	687061	686382	668768	689237	669605	683550	644357	316975	954246	386763	777683	773120	386463	434766	755649	746473	619240	361658	329759
546	465.321	464.314	9.4121	2.78375e+06	2.81079e+06	2.77249e+06	2.73947e+06	2.74409e+06	2.7602e+06	2.7207e+06	2.64131e+06	3.24688e+06	3.16344e+06	2.27491e+06	2.40075e+06	2.33363e+06	3.2492e+06	2.84117e+06	1.83559e+06	2.18042e+06	1.47829e+06	2.13421e+06	1.59313e+06
547	466.311	465.303	15.8629	3.97423e+07	4.0076e+07	3.84791e+07	3.7962e+07	3.78459e+07	3.75656e+07	3.63612e+07	3.64584e+07	3.37354e+07	4.62362e+07	2.4032e+07	3.53982e+07	3.62539e+07	3.28183e+07	2.32596e+07	5.39689e+07	5.77523e+07	3.14254e+07	4.98511e+07	2.98732e+07
548	466.311	465.304	15.9293	3.70597e+07	3.77485e+07	3.61246e+07	3.55742e+07	3.55335e+07	3.53456e+07	3.41443e+07	3.43167e+07	3.03738e+07	4.06517e+07	2.19622e+07	3.2088e+07	3.28157e+07	3.02004e+07	2.18311e+07	5.05593e+07	5.52186e+07	2.95478e+07	4.71366e+07	2.82539e+07
549	466.311	465.303	15.9868	3.95741e+07	3.99079e+07	3.82983e+07	3.77944e+07	3.76739e+07	3.73852e+07	3.61906e+07	3.62787e+07	3.34333e+07	4.57389e+07	2.38362e+07	3.5098e+07	3.59707e+07	3.26159e+07	2.31598e+07	5.37335e+07	5.75341e+07	3.1286e+07	4.96571e+07	2.9753e+07
550	466.328	465.321	5.03091	157070	157411	149931	149675	149360	148401	142660	139488	172454	0	160526	0	0	236700	395039	31936.7	28119.9	0	527752	224404
551	466.328	465.321	5.24077	106245	98104	94584.5	92552.4	92203.8	91301.9	92246.2	90220.7	87962.5	0	94055.3	0	0	146752	284296	19881.4	16221.3	0	396508	154957
552	466.328	465.321	5.95282	68416.1	64729.9	62035.3	57634.5	58656.1	56567	57935.6	54743.4	54980.2	0	56406.4	334.104	468.396	214150	155294	3009.19	391.32	0	318574	79044.8
553	467.3	466.293	7.57224	393866	392751	394325	403925	408763	404027	401908	397153	180208	733469	263961	629523	618655	159073	248750	752027	528486	482325	263545	267417
554	467.314	466.307	15.8434	1.16853e+07	1.17844e+07	1.13181e+07	1.11775e+07	1.11259e+07	1.09926e+07	1.06822e+07	1.06889e+07	9.89289e+06	1.364e+07	7.0349e+06	1.03749e+07	1.05923e+07	9.55327e+06	6.765e+06	1.59403e+07	1.70941e+07	9.16251e+06	1.46331e+07	8.68952e+06
555	467.337	466.33	8.79665	5.02482e+06	5.12301e+06	5.18842e+06	5.06178e+06	5.09297e+06	5.02218e+06	5.02494e+06	4.82706e+06	2.71432e+06	7.71792e+06	2.86122e+06	5.73365e+06	5.32903e+06	2.98807e+06	3.01107e+06	3.98237e+06	4.03438e+06	3.88289e+06	3.07906e+06	2.52299e+06
556	467.337	466.329	9.50181	2.68207e+06	2.67536e+06	2.672e+06	2.62275e+06	2.62919e+06	2.56303e+06	2.56223e+06	2.48385e+06	1.97448e+06	4.4522e+06	1.57402e+06	2.60153e+06	2.40003e+06	1.89088e+06	1.7905e+06	1.82917e+06	1.69647e+06	1.16258e+06	2.07558e+06	1.29228e+06
557	468.199	467.192	4.54903	61860.8	64895.7	61415.7	62949.5	58094	58762.3	65147.8	62097.4	75627.9	7956.41	71746.5	0	0	196084	102273	65713.6	63159.2	7682.55	136857	84204.3
558	468.319	467.312	15.9408	1.42618e+06	1.42521e+06	1.34687e+06	1.33624e+06	1.34654e+06	1.32683e+06	1.29472e+06	1.27914e+06	1.18813e+06	1.6199e+06	819288	1.24538e+06	1.25549e+06	1.14061e+06	809442	1.91065e+06	2.03028e+06	1.0888e+06	1.77789e+06	1.03838e+06
559	474.289	473.282	10.8413	580602	586444	567278	556945	564425	579424	578135	568592	178597	431896	156982	176550	159343	650630	633452	551546	167641	490346	787525	291655
560	475.269	474.262	6.86662	186385	184241	179959	179398	174996	165778	169992	165354	275238	208977	359414	217593	160759	185303	198478	125954	97348.7	181490	291524	402050
561	477.254	476.247	5.29947	81610.1	78076.7	79021.4	72888.3	67176.9	65497.6	68818.4	68714.8	97684.1	0	96414.3	0	0	399018	147503	0	0	0	247173	107096
562	477.285	476.278	7.25863	7.09694e+06	7.03432e+06	6.88844e+06	6.7703e+06	6.74838e+06	6.68056e+06	6.57587e+06	6.53446e+06	1.0833e+07	9.48617e+06	1.15219e+07	8.34022e+06	9.38023e+06	5.57143e+06	5.02097e+06	5.41474e+06	4.67645e+06	5.95809e+06	7.06004e+06	6.68431e+06
563	477.285	476.278	7.4389	6.36268e+06	5.94672e+06	5.87615e+06	5.85512e+06	5.79189e+06	5.75159e+06	5.66013e+06	5.69295e+06	9.23751e+06	8.11462e+06	9.62343e+06	7.18011e+06	8.08535e+06	4.57693e+06	4.22051e+06	4.76585e+06	4.09465e+06	5.21707e+06	6.08222e+06	5.54604e+06
564	479.269	478.262	5.45659	248707	237873	228268	216373	214527	211794	211360	194425	338546	1022.81	365851	343.368	0	1.31794e+06	350670	332.208	564.867	380.403	715352	251802
565	479.301	478.293	7.11645	3.07325e+06	2.89306e+06	2.82439e+06	2.72571e+06	2.73988e+06	2.73188e+06	2.73603e+06	2.68998e+06	895072	2.64159e+06	1.34116e+06	2.32702e+06	2.13371e+06	1.04016e+06	4.44699e+06	3.63098e+06	2.92819e+06	5.28373e+06	3.25984e+06	5.14658e+06
566	479.302	500.277	7.30548	1.12012e+07	1.11235e+07	1.09527e+07	1.06687e+07	1.06378e+07	1.06141e+07	1.04888e+07	1.04469e+07	1.73943e+07	1.04247e+07	1.95648e+07	1.37028e+07	1.02823e+07	1.2992e+07	1.10537e+07	1.17568e+07	1.11553e+07	8.21774e+06	1.32509e+07	1.42396e+07
567	479.289	478.282	7.44328	123116	121736	119040	121377	123552	112681	116318	124711	225808	111970	238185	127129	173073	115033	73654.8	97975.8	87466	92835.5	148775	125421
568	479.301	478.294	7.98642	1.89078e+06	1.8607e+06	1.8371e+06	1.82096e+06	1.81033e+06	1.77283e+06	1.7734e+06	1.74463e+06	2.31195e+06	2.05031e+06	2.22038e+06	1.81145e+06	1.65362e+06	1.6239e+06	1.59152e+06	2.0068e+06	1.69146e+06	1.39665e+06	1.99959e+06	2.07972e+06
569	479.324	478.316	5.11264	30738.9	21335.9	25544.6	24072.8	22706.8	21615.2	18862.2	20638.5	402.192	0	0	0	0	13021	53060.5	0	0	0	201319	50000.6
570	480.304	479.297	8.13446	439234	444304	427415	438066	439839	421230	423760	424263	541987	475043	535095	420324	392719	394422	373332	488935	406434	326109	487762	499069
571	481.285	480.278	6.22617	106645	100088	88125.5	87405.2	89133.7	82348.6	76252.5	77272	160238	0	148280	0	0	728981	73775.7	0	0	0	275971	139362
572	481.316	480.309	7.93871	7.6329e+07	7.64609e+07	7.65828e+07	7.59899e+07	7.58063e+07	7.53835e+07	7.49056e+07	7.37554e+07	6.80487e+07	1.02383e+08	7.82897e+07	9.74502e+07	9.17332e+07	6.4338e+07	7.23704e+07	6.79664e+07	6.95105e+07	8.89576e+07	6.17184e+07	6.78292e+07
573	481.316	480.309	8.17071	7.34039e+07	7.3262e+07	7.34192e+07	7.29033e+07	7.27865e+07	7.24257e+07	7.20302e+07	7.09889e+07	6.48632e+07	9.64261e+07	7.38354e+07	9.17189e+07	8.6816e+07	6.08867e+07	6.94276e+07	6.53155e+07	6.65738e+07	8.54996e+07	5.95122e+07	6.56229e+07
574	481.316	480.309	8.26322	7.81613e+07	7.81414e+07	7.82599e+07	7.75066e+07	7.73169e+07	7.69201e+07	7.63343e+07	7.51345e+07	7.09849e+07	1.06586e+08	8.07617e+07	1.00985e+08	9.43638e+07	6.63313e+07	7.39961e+07	6.93021e+07	7.10784e+07	9.09036e+07	6.26949e+07	6.90688e+07
575	481.316	480.309	8.35428	6.23228e+07	6.12855e+07	6.13583e+07	6.12036e+07	6.09265e+07	6.04059e+07	6.02674e+07	5.94718e+07	5.62436e+07	7.8757e+07	6.27635e+07	7.48348e+07	7.08273e+07	5.35255e+07	5.8631e+07	5.55814e+07	5.69992e+07	6.93398e+07	4.97008e+07	5.43754e+07
576	481.316	480.309	8.78825	1.09805e+07	1.18479e+07	1.17354e+07	1.12437e+07	1.09735e+07	1.13627e+07	1.05355e+07	1.02182e+07	1.35806e+07	2.27135e+07	1.65614e+07	2.19517e+07	1.84088e+07	1.37011e+07	1.0887e+07	9.64259e+06	1.15121e+07	1.23185e+07	7.65392e+06	8.05554e+06
577	481.316	480.309	9.01895	1.44072e+07	1.40735e+07	1.40693e+07	1.36881e+07	1.36507e+07	1.33688e+07	1.3249e+07	1.25685e+07	1.43762e+07	2.33357e+07	1.89369e+07	2.59919e+07	2.16767e+07	1.84011e+07	1.30893e+07	1.19928e+07	1.40847e+07	1.4428e+07	9.80487e+06	9.21817e+06
578	482.215	481.207	4.69987	334630	313780	307446	300627	293489	278703	279452	266663	645281	11401.6	548488	0	0	1.55038e+06	210724	25674.6	25808.3	0	447639	224659
579	482.242	481.235	8.58394	1.13602e+06	1.19102e+06	1.18418e+06	1.17911e+06	1.18429e+06	1.18196e+06	1.14528e+06	1.11703e+06	1.61977e+06	1.09922e+06	1.4641e+06	1.41228e+06	901601	1.34803e+06	832868	1.05636e+06	739176	730002	1.27753e+06	1.03985e+06
580	482.319	481.312	8.31578	2.00929e+07	2.02959e+07	2.03043e+07	2.00765e+07	1.99515e+07	1.99295e+07	1.97322e+07	1.95229e+07	1.85426e+07	2.79578e+07	2.1331e+07	2.66022e+07	2.45936e+07	1.75669e+07	1.91744e+07	1.80398e+07	1.84916e+07	2.33961e+07	1.62166e+07	1.77468e+07
581	483.301	482.293	6.07826	235217	227635	217638	210122	204151	193641	184064	196332	416035	776.55	380331	0	334.26	1.39874e+06	195573	313.368	328.56	0	673071	400640
582	483.322	482.314	8.27399	3.27965e+06	3.3314e+06	3.32188e+06	3.27915e+06	3.2716e+06	3.26492e+06	3.23438e+06	3.15954e+06	3.03377e+06	4.60909e+06	3.48355e+06	4.37881e+06	4.07097e+06	2.88732e+06	3.14739e+06	2.94704e+06	3.04421e+06	3.83803e+06	2.62643e+06	2.86317e+06
583	486.041	553.022	0.789848	66497.5	63745.7	65074.1	64515.9	65642.4	62335.1	67529.1	64199.1	68741.6	42990.4	52047.9	50659.7	44733	45916.6	51757.7	138604	124170	54270.6	73115.9	49162.5
584	486.279	485.272	16.4409	1.53047e+06	1.50085e+06	1.22371e+06	1.15671e+06	933507	781482	639078	578906	3.15306e+06	416310	1.75213e+06	911604	454389	2.35853e+06	1.95355e+06	1.49286e+06	1.99467e+06	333043	1.38519e+06	1.0079e+06
585	487.282	486.274	16.4641	562645	558579	460323	433261	342896	287714	237873	219506	1.18354e+06	161377	655436	334601	172554	889259	727706	562911	753776	120638	509748	385286
586	488.244	487.236	4.7016	679981	659370	665910	654131	665097	645569	651361	639513	360545	1292.43	442504	0	8768.97	1.46247e+06	2.0114e+06	8269.15	2571.76	897.456	2.38484e+06	2.21507e+06
587	493.352	492.345	9.10264	1.69228e+06	1.72484e+06	1.7497e+06	1.70078e+06	1.73079e+06	1.71639e+06	1.70729e+06	1.6006e+06	838051	2.60158e+06	1.14148e+06	2.75724e+06	2.29734e+06	675720	1.02174e+06	1.84784e+06	1.90064e+06	1.97873e+06	654434	837648
588	493.352	492.345	9.23065	1.60305e+06	1.6328e+06	1.66007e+06	1.61518e+06	1.6421e+06	1.62502e+06	1.62108e+06	1.51575e+06	750303	2.4334e+06	1.08749e+06	2.6665e+06	2.21597e+06	641324	947345	1.73142e+06	1.80405e+06	1.91849e+06	567963	789306
589	493.352	492.345	10.9551	730044	724403	695610	682231	720867	728860	713977	664784	818997	1.15177e+06	632423	1.01212e+06	893911	974514	813032	431767	406637	422664	402560	281981
590	495.265	494.257	3.99653	158677	157079	149701	144857	136588	132136	128064	129112	326206	742.728	244230	352.488	0	925418	43045.2	315.648	0	0	106869	98413.5
591	495.264	494.257	4.27951	698384	685269	674434	670764	650608	627685	624825	597859	1.13263e+06	31462.3	966078	4660.79	0	2.0952e+06	775742	2779.24	2970.45	310.296	998676	630178
592	495.265	494.257	4.72652	851952	808274	794013	769412	762744	725547	723556	693968	1.37522e+06	31166.3	1.15136e+06	6354.33	380.016	3.51081e+06	908375	3929.67	3940.51	0	1.98833e+06	1.05844e+06
593	495.265	494.257	4.82689	849634	794096	787723	755066	752482	715336	706074	681505	1.40986e+06	1792.75	1.07532e+06	2046.02	380.016	3.77887e+06	854122	2888.72	3337.65	0	2.04856e+06	1.11412e+06
594	495.332	494.324	8.86838	3.63593e+06	3.70403e+06	3.65141e+06	3.54823e+06	3.55079e+06	3.51705e+06	3.49829e+06	3.31086e+06	2.66841e+06	6.17443e+06	4.29726e+06	6.47755e+06	5.57408e+06	2.82538e+06	2.59057e+06	3.10416e+06	2.43832e+06	3.60179e+06	2.1311e+06	2.46919e+06
595	495.332	494.324	8.95681	3.64267e+06	3.70674e+06	3.64961e+06	3.5471e+06	3.54945e+06	3.51565e+06	3.49567e+06	3.3093e+06	2.71864e+06	6.24078e+06	4.33638e+06	6.49662e+06	5.58034e+06	2.83379e+06	2.58472e+06	3.08949e+06	2.42845e+06	3.59122e+06	2.12841e+06	2.46286e+06
596	495.368	494.36	11.3818	1.55102e+06	1.63118e+06	1.55485e+06	1.5714e+06	1.68932e+06	1.68166e+06	1.57382e+06	1.4723e+06	823436	2.27948e+06	932526	1.96995e+06	1.96778e+06	1.42582e+06	980137	1.03407e+06	857904	768206	695230	549013
597	496.125	495.118	3.73277	185272	180540	172161	164295	164385	161354	153579	153628	391430	77777.8	332242	20800.3	35331.2	632969	270880	96184.8	37924.6	44753.5	345691	187924
598	496.268	495.26	4.85314	321957	310159	303512	283069	284521	275475	266779	264900	487880	8252.7	377882	385.032	0	1.24539e+06	307941	68731.9	130564	0	725292	373197
599	497.28	496.272	4.05789	693286	691924	651303	649288	631250	613636	600923	574347	1.39864e+06	43296.3	862892	22010.5	622.776	2.22371e+06	346985	9849.02	681.858	337.776	702981	695765
600	497.28	496.273	4.42488	4.30927e+06	4.27343e+06	4.1754e+06	4.06664e+06	4.04306e+06	4.02328e+06	4.00379e+06	3.94593e+06	5.33568e+06	54858.4	5.83147e+06	17833.1	9148.84	6.1111e+06	6.718e+06	86378.4	106393	19216.9	5.86884e+06	4.50883e+06
601	497.281	496.274	4.67054	6.10948e+06	5.8089e+06	5.63682e+06	5.42387e+06	5.43224e+06	5.29444e+06	5.15876e+06	5.14576e+06	9.26961e+06	50555.8	8.43892e+06	14806.3	10251.7	1.6172e+07	6.91887e+06	114824	139867	21180.4	8.79886e+06	6.21286e+06
602	497.281	496.274	4.78284	2.7616e+06	2.68825e+06	2.58673e+06	2.47746e+06	2.44002e+06	2.35163e+06	2.30287e+06	2.2106e+06	5.57421e+06	26990.4	4.15952e+06	7208.17	5323.82	1.36713e+07	2.34075e+06	57467.6	67812.7	6859.98	5.78764e+06	3.14235e+06
603	497.281	496.274	5.14632	4.51567e+06	4.26239e+06	4.09343e+06	3.92261e+06	3.86575e+06	3.74074e+06	3.62115e+06	3.54937e+06	8.15188e+06	53196.3	5.03357e+06	24150	12597.5	1.75112e+07	2.76199e+06	24303.8	28164.1	3495.77	8.43172e+06	4.99302e+06
604	498.237	497.23	6.53443	319642	317237	321487	317708	313615	312916	306709	304227	1.23104e+06	147284	680133	91139.3	53182.9	186931	453539	398320	596829	112376	440770	400958
605	498.284	497.277	5.15398	845974	797455	770929	732779	713923	694633	664146	652731	1.4109e+06	1929.1	882159	0	0	2.82743e+06	347235	775.092	0	0	1.34976e+06	818631
606	499.208	498.2	3.78713	22032.3	23399.3	21488.4	19165.5	21968.3	19222.5	22430	20958.6	37748.5	2539.6	36033.6	1187.34	3591.53	146740	39197.5	437.4	0	1495.73	46590.6	32173.1
607	499.259	498.252	4.05006	56154.5	53525.6	52204.8	52143.6	53355.1	52416.3	51445.6	54149.7	50580.3	0	47740.6	0	0	102505	158835	0	0	0	152200	105203
608	499.269	498.261	6.87928	175119	165443	161662	158677	158843	157028	155221	153523	241463	119887	308276	135870	103418	145037	182976	261200	214582	151746	313293	364313
609	499.296	498.288	4.30637	1.89924e+07	1.88493e+07	1.8502e+07	1.82464e+07	1.8041e+07	1.76987e+07	1.77751e+07	1.75933e+07	2.4473e+07	288829	2.19403e+07	154076	136988	3.59303e+07	2.7241e+07	406368	652226	268259	3.97005e+07	2.80603e+07
610	499.295	498.288	4.45655	2.14911e+07	2.10708e+07	2.0699e+07	2.03686e+07	2.01651e+07	1.98598e+07	1.98883e+07	1.96537e+07	2.789e+07	316164	2.4171e+07	159940	148780	4.31118e+07	3.07291e+07	465745	723030	316454	4.62758e+07	3.22897e+07
611	499.295	498.288	4.98307	6.47353e+07	6.20442e+07	6.02082e+07	5.84422e+07	5.73677e+07	5.60373e+07	5.47158e+07	5.39676e+07	1.03642e+08	1.24271e+06	7.76147e+07	777413	645417	1.84933e+08	5.07773e+07	898227	1.35107e+06	482432	1.22128e+08	7.73848e+07
612	499.295	498.288	5.03917	4.45496e+07	4.33656e+07	4.19894e+07	4.05689e+07	3.9604e+07	3.83178e+07	3.71227e+07	3.69548e+07	7.41043e+07	913015	5.61462e+07	602909	498019	1.41539e+08	2.7546e+07	485265	707603	208340	8.45605e+07	5.03983e+07
613	499.296	498.288	5.19859	4.95955e+07	4.72506e+07	4.55453e+07	4.39952e+07	4.31044e+07	4.19462e+07	4.05376e+07	3.99347e+07	8.39096e+07	992782	6.13381e+07	645847	530472	1.57213e+08	2.88858e+07	505113	748941	212224	9.21687e+07	5.45411e+07
614	500.291	499.283	6.45282	176854	172951	177842	174545	179900	178229	180531	191383	109853	181893	190437	138737	185159	82882.7	134914	21285.8	26726.1	179859	249402	223483
615	500.299	499.292	5.04345	1.5313e+07	1.45308e+07	1.40297e+07	1.35301e+07	1.31642e+07	1.2806e+07	1.24607e+07	1.2187e+07	2.58497e+07	284912	1.8762e+07	186725	148114	4.87449e+07	9.26546e+06	146697	214992	61767.5	2.91013e+07	1.69972e+07
616	501.275	500.268	3.94281	756319	729571	743079	741525	755910	760116	775470	787460	158210	0	217023	0	0	861378	3.6746e+06	2268.55	6794.24	0	2.18196e+06	773554
617	501.284	500.277	7.42042	1.12566e+07	1.07603e+07	1.05955e+07	1.04656e+07	1.04742e+07	1.03408e+07	1.02179e+07	1.02757e+07	1.68166e+07	1.01153e+07	1.89723e+07	1.33548e+07	1.01189e+07	1.25968e+07	1.08123e+07	1.16597e+07	1.09563e+07	8.20131e+06	1.30845e+07	1.36198e+07
618	501.292	500.285	4.3067	528854	513710	505373	498903	503115	479869	472734	485765	657544	1021.27	595704	0	0	968644	747770	1444.56	5770.85	2291.28	1.13439e+06	797007
619	501.293	500.286	4.47096	518033	505632	497029	490772	489394	469193	464291	479037	642548	1021.27	588940	0	0	949737	732301	1444.56	5770.85	1218.86	1.09345e+06	782320
620	501.293	500.286	5.19367	1.00109e+06	963089	1.00716e+06	1.00437e+06	1.01607e+06	1.04093e+06	1.00124e+06	980331	1.92925e+06	15041.7	1.2082e+06	7663.13	5372.22	4.58085e+06	687171	5042.57	10415.3	1563.22	1.80567e+06	1.0259e+06
621	501.298	500.291	5.22455	1.21076e+06	1.07998e+06	1.11299e+06	1.04364e+06	1.07633e+06	922328	1.02138e+06	890472	2.47953e+06	11168.7	1.53176e+06	6437.89	8939.37	4.95281e+06	248973	5593.94	11917.2	381.984	2.35324e+06	1.24111e+06
622	501.302	500.294	4.42008	740431	729470	707113	710511	703855	678844	682533	670887	939051	3042.54	837934	0	0	1.4053e+06	1.07612e+06	2905.43	12543.5	345.357	1.56057e+06	1.12651e+06
623	501.297	500.29	4.99199	1.52446e+06	1.43676e+06	1.47984e+06	1.36861e+06	1.33765e+06	1.34183e+06	1.32945e+06	1.29327e+06	2.77186e+06	8962.3	2.04742e+06	2784.02	8151.84	7.00777e+06	556082	4418.33	13319.3	791.592	3.44652e+06	1.64949e+06
624	502.292	501.285	5.19754	476188	448782	434938	431826	402242	410714	393279	374622	829494	4201.94	597079	1239.59	2014.66	1.57157e+06	298204	624.192	3876.96	1125.95	946541	522968
625	502.307	501.299	6.999	671198	663625	661786	655724	657400	678298	688243	710410	397488	661899	658082	459444	612591	351581	654831	79991.5	113464	801190	842947	1.11397e+06
626	503.3	502.293	7.14197	1.12327e+06	1.0713e+06	1.0664e+06	1.02752e+06	1.03817e+06	1.00432e+06	996366	956310	1.48328e+06	753014	1.73133e+06	900469	687689	2.29797e+06	1.499e+06	537019	392394	916630	1.65105e+06	2.605e+06
627	503.3	502.293	7.81838	546903	545495	534951	528295	529542	509346	514826	496468	687743	587855	864585	713280	720878	517033	394612	581391	491252	505876	705127	802217
628	503.311	502.303	7.00078	109299	116722	115980	113923	108359	118653	112707	116173	57738.1	139290	109094	80490.9	120540	12545.3	85830.8	3365.3	12051.2	138498	107837	134382
629	505.316	504.309	7.4798	1.09593e+07	1.35465e+07	1.40731e+07	1.33374e+07	1.30386e+07	1.34732e+07	1.36696e+07	1.34947e+07	1.45224e+07	1.15696e+07	1.61298e+07	1.28866e+07	1.37199e+07	1.50465e+07	1.47587e+07	1.10559e+07	1.02408e+07	1.44148e+07	1.54448e+07	1.68178e+07
630	505.316	504.309	7.67587	3.19251e+07	3.1537e+07	3.15538e+07	3.1142e+07	3.09834e+07	3.05137e+07	3.075e+07	3.02613e+07	4.00336e+07	3.15231e+07	4.15035e+07	3.0796e+07	3.1962e+07	3.64448e+07	3.33797e+07	2.34974e+07	2.04712e+07	3.21002e+07	3.49844e+07	3.6554e+07
631	507.331	506.324	8.48488	2.45465e+07	2.45111e+07	2.43425e+07	2.41253e+07	2.41756e+07	2.37573e+07	2.36877e+07	2.30653e+07	2.76178e+07	2.63128e+07	2.9745e+07	2.72022e+07	2.31597e+07	2.76302e+07	2.87491e+07	2.14139e+07	1.89867e+07	2.95398e+07	2.9057e+07	3.38861e+07
632	508.23	507.223	4.40111	90977.7	90789.9	87633.7	92750.1	88987.3	86814.4	91849	94832.4	8150.51	53465.5	4016.4	0	0	6547.23	179238	242447	209271	0	205935	37610.4
633	508.279	507.272	8.38721	1.17005e+06	1.17359e+06	1.15225e+06	1.14022e+06	1.14809e+06	1.14619e+06	1.1351e+06	1.10311e+06	1.88987e+06	1.25164e+06	1.88885e+06	1.0739e+06	1.26884e+06	886267	851022	647110	673673	807225	1.31751e+06	1.32497e+06
634	508.335	507.328	8.51228	6.66873e+06	6.65605e+06	6.62333e+06	6.54331e+06	6.57109e+06	6.4477e+06	6.40416e+06	6.26385e+06	7.4687e+06	7.15229e+06	8.03504e+06	7.39823e+06	6.2806e+06	7.50901e+06	7.84203e+06	5.82864e+06	5.16534e+06	8.04141e+06	7.91077e+06	9.23279e+06
635	509.228	508.221	3.85473	26542.6	25841.8	26363.3	22730.9	25949.5	22809	16901.2	21522.6	39690.3	5911.45	40584.6	0	2010.7	184993	18825.9	0	0	1265.21	74878.9	18339.6
636	509.347	508.34	9.39066	5.1304e+07	5.21904e+07	5.20532e+07	5.11295e+07	5.16457e+07	5.13018e+07	5.09783e+07	5.00343e+07	5.04596e+07	6.74934e+07	6.72574e+07	8.04191e+07	7.20495e+07	4.78444e+07	4.89857e+07	4.08298e+07	4.45301e+07	6.04377e+07	3.76219e+07	4.08954e+07
637	509.347	508.34	9.63139	5.96734e+07	5.98379e+07	5.92666e+07	5.80991e+07	5.87518e+07	5.80669e+07	5.76335e+07	5.61663e+07	6.72216e+07	8.68011e+07	8.4214e+07	1.00105e+08	8.66011e+07	5.5565e+07	5.51219e+07	4.54647e+07	4.95573e+07	6.73799e+07	4.11973e+07	4.46103e+07
638	509.347	508.34	9.80109	6.10926e+07	6.11115e+07	6.04505e+07	5.93011e+07	5.99473e+07	5.92412e+07	5.87835e+07	5.72182e+07	7.07545e+07	9.08295e+07	8.77253e+07	1.04381e+08	8.95999e+07	5.70725e+07	5.62128e+07	4.62837e+07	5.04423e+07	6.86474e+07	4.1763e+07	4.52996e+07
639	509.347	508.34	9.97619	4.75429e+07	4.65806e+07	4.60126e+07	4.51922e+07	4.55105e+07	4.42811e+07	4.46191e+07	4.3174e+07	5.55631e+07	6.7489e+07	6.53743e+07	7.27496e+07	6.35489e+07	4.08446e+07	4.09004e+07	3.46865e+07	3.65673e+07	4.63294e+07	3.0944e+07	3.2642e+07
640	509.347	508.34	9.94572	3.54117e+07	3.36372e+07	3.30605e+07	3.24361e+07	3.23425e+07	3.09354e+07	3.12449e+07	2.98477e+07	4.35067e+07	4.99726e+07	4.75322e+07	5.19471e+07	4.49406e+07	2.81066e+07	2.74263e+07	2.35403e+07	2.42318e+07	3.0219e+07	2.01478e+07	2.09554e+07
641	510.282	509.275	4.7161	358845	349670	345061	344269	340919	336552	340346	334629	263393	0	131000	0	0	550814	1.1115e+06	8769.49	5436.42	365.877	1.36393e+06	429497
642	510.295	509.287	9.82387	1.33528e+06	1.3089e+06	1.28907e+06	1.27247e+06	1.27466e+06	1.28237e+06	1.25426e+06	1.23308e+06	1.8452e+06	1.57043e+06	1.85266e+06	1.52827e+06	1.46179e+06	1.06635e+06	1.23607e+06	1.09778e+06	1.16829e+06	1.14715e+06	1.59665e+06	1.46152e+06
643	511.261	510.253	4.09198	371256	373879	372364	366049	361700	360339	359829	350266	538524	4302.39	410606	0	0	735294	469608	0	1589.03	0	460174	323791
644	511.26	510.252	4.65038	227406	220605	212030	209932	207771	208951	194145	196716	293308	0	238445	0	0	943083	234765	805.713	1174.25	730.56	348613	219593
645	511.296	510.288	4.66333	100732	93480	95217.6	92966.4	81594.2	85086.8	83859.4	83387	145341	0	136714	0	0	400511	163344	0	334.704	0	215502	96362.2
646	511.888	578.868	0.825514	30835.8	30696.9	30072.8	30989.8	31521.6	33263.9	28399	31400.2	36700.8	34284.5	27763.7	34456	25851.2	34258.7	27394.2	26145.8	28897.2	18423.7	32755.9	23531.4
647	511.888	510.88	17.0987	106641	102390	104466	98753.7	93489.9	86191.7	75296.4	78486.6	221155	217155	211409	204366	200773	139186	115759	110610	115992	85090	90655.6	85624.5
648	513.26	512.252	3.99919	12218.3	13431.8	11562.7	10765.4	11115.7	9369.25	11097.6	9542.03	1704.78	0	12192.2	0	0	22796.1	6899.86	0	0	0	143806	30125.6
649	513.275	512.267	4.25404	3.63956e+07	3.55574e+07	3.43558e+07	3.36212e+07	3.32807e+07	3.2468e+07	3.21074e+07	3.15325e+07	4.7408e+07	101749	4.19021e+07	53528.8	54157.6	7.98266e+07	4.2218e+07	251757	380458	82976.7	5.52808e+07	4.20242e+07
650	513.275	512.267	4.33557	3.63116e+07	3.54777e+07	3.428e+07	3.35576e+07	3.32069e+07	3.23987e+07	3.20273e+07	3.14726e+07	4.72498e+07	101245	4.17656e+07	53528.8	54157.6	7.91685e+07	4.19857e+07	249087	374777	82976.7	5.48773e+07	4.19365e+07
651	513.305	512.298	6.99922	1.14328e+06	1.13165e+06	1.09809e+06	1.11019e+06	1.1103e+06	1.09121e+06	1.09828e+06	1.06618e+06	659052	1.34285e+06	822051	1.22742e+06	1.12102e+06	623227	1.63751e+06	956153	872020	1.92527e+06	1.13271e+06	1.58186e+06
652	514.278	513.271	4.2519	1.04056e+07	1.01795e+07	9.81435e+06	9.64898e+06	9.44903e+06	9.29267e+06	9.15801e+06	9.00542e+06	1.37653e+07	16953.8	1.20937e+07	6260.65	7681.36	2.34783e+07	1.21898e+07	59122.4	99777.4	16241.2	1.61852e+07	1.21968e+07
653	515.229	514.222	5.00557	71406.8	67360.6	69175.5	61060.6	62299.9	58853.9	54218	57113.7	208732	0	179855	0	489.24	161548	51562.3	0	347.424	0	89925.4	50454.1
654	515.273	514.266	4.33665	822015	742653	741374	698441	742299	713146	669368	656822	1.07369e+06	0	955146	0	0	1.16268e+06	829951	615.36	415.08	0	1.10186e+06	1.05555e+06
655	515.289	514.282	4.10333	1.64131e+08	1.66109e+08	1.6274e+08	1.61261e+08	1.59129e+08	1.53753e+08	1.5407e+08	1.54453e+08	1.79169e+08	919120	1.70378e+08	810890	617243	3.26151e+08	1.95516e+08	2.61156e+06	3.80796e+06	1.19029e+06	2.74575e+08	1.67336e+08
656	515.289	514.282	4.17649	2.01209e+08	2.0239e+08	1.98612e+08	1.96975e+08	1.94682e+08	1.9271e+08	1.89591e+08	1.89942e+08	2.16848e+08	1.46001e+06	2.04983e+08	1.34524e+06	936291	3.65035e+08	2.2695e+08	3.72635e+06	5.38515e+06	1.28457e+06	3.17979e+08	2.02618e+08
657	515.289	514.282	4.46132	2.4235e+08	2.3991e+08	2.35026e+08	2.31891e+08	2.30126e+08	2.27983e+08	2.2715e+08	2.25104e+08	2.6163e+08	1.79588e+06	2.49481e+08	1.72611e+06	1.13592e+06	4.36029e+08	2.5937e+08	4.25625e+06	6.27507e+06	1.29066e+06	3.62212e+08	2.40695e+08
658	516.274	515.267	4.90229	107281	102167	94367.8	95383.8	95335.3	90677.7	90664.7	91571.7	0	0	523.248	0	0	282413	215383	0	0	0	488349	101095
659	516.311	515.304	5.25842	238408	232203	218555	211888	217314	203922	201307	202923	204729	324.816	197325	0	0	933485	402848	0	369.288	0	601940	191893
660	517.279	516.272	5.93551	304126	296324	294768	283799	288997	287744	280540	288929	968716	118739	675357	106835	54772.9	58858	374200	915640	955123	93666.3	428784	586783
661	517.29	516.283	4.12469	7.35876e+06	7.33447e+06	7.28716e+06	6.83989e+06	7.11622e+06	7.04105e+06	6.68348e+06	6.93434e+06	7.75497e+06	7514.9	7.81289e+06	11909	6277.87	1.45925e+07	1.02026e+07	44970.3	70766.5	18480.1	1.28012e+07	7.62329e+06
662	517.29	516.283	4.17288	7.41048e+06	7.32678e+06	7.28301e+06	6.83478e+06	7.11108e+06	7.0365e+06	6.8016e+06	6.9289e+06	7.74908e+06	7081.7	7.8077e+06	11909	6277.87	1.42052e+07	1.01913e+07	42058.3	70766.5	17644.1	1.27171e+07	7.7469e+06
663	517.292	516.285	4.24426	7.78403e+06	7.65517e+06	7.51607e+06	7.27331e+06	7.40452e+06	7.2692e+06	7.23405e+06	7.18581e+06	8.0521e+06	12941.4	8.15856e+06	11020.9	8743.56	1.42088e+07	1.05315e+07	56228.3	86466.4	24893.5	1.28512e+07	8.19821e+06
664	517.29	516.283	4.32389	1.26366e+07	1.27361e+07	1.23535e+07	1.22055e+07	1.21158e+07	1.19126e+07	1.14526e+07	1.13908e+07	1.4173e+07	23674.3	1.30078e+07	23467.3	14844.7	2.71744e+07	1.40878e+07	96980.6	135299	17381.1	2.19931e+07	1.28542e+07
665	517.29	516.283	4.3748	1.33106e+07	1.33161e+07	1.2648e+07	1.24862e+07	1.26723e+07	1.24538e+07	1.17104e+07	1.19772e+07	1.46231e+07	24961.8	1.38847e+07	28216.6	12824.3	2.92634e+07	1.45245e+07	94852.9	145193	19086.4	2.34713e+07	1.29925e+07
666	517.29	516.283	4.48468	1.33474e+07	1.33417e+07	1.26794e+07	1.25129e+07	1.2705e+07	1.2481e+07	1.17332e+07	1.20009e+07	1.46738e+07	24961.8	1.39427e+07	28216.6	12824.3	2.94433e+07	1.45664e+07	94852.9	145193	19086.4	2.357e+07	1.3042e+07
667	517.291	516.283	4.51623	8.8421e+06	8.77136e+06	8.19692e+06	8.20104e+06	8.18006e+06	7.80766e+06	7.36293e+06	7.60397e+06	9.85102e+06	20548.2	9.03609e+06	19129.6	9106.49	2.01574e+07	7.74371e+06	71799.2	98951.1	5563.48	1.43024e+07	8.52585e+06
668	517.288	516.281	4.60989	1.75054e+06	1.75709e+06	1.37373e+06	1.46874e+06	1.31064e+06	1.47091e+06	1.15335e+06	1.60267e+06	1.95186e+06	13358.7	1.93595e+06	14124.7	4902.14	3.50317e+06	1.13935e+06	28020.8	29997	0	2.40281e+06	1.61809e+06
669	517.286	516.279	4.57927	4.10377e+06	4.23354e+06	3.55716e+06	3.04564e+06	3.07078e+06	2.89341e+06	2.88384e+06	2.65425e+06	4.59375e+06	19931.7	2.86252e+06	21642.4	9063.82	1.38254e+07	711777	52504.1	76377.9	1619.95	8.67617e+06	3.41299e+06
670	518.291	517.284	4.17031	2.44918e+06	2.40667e+06	2.35654e+06	2.32671e+06	2.30778e+06	2.29345e+06	2.28827e+06	2.26691e+06	2.65816e+06	6934.42	2.50638e+06	6037.88	2806.58	4.4807e+06	2.64649e+06	30685.2	52887.3	5664.31	3.73863e+06	2.42284e+06
671	518.29	517.282	4.49446	2.47087e+06	2.43087e+06	2.38717e+06	2.34953e+06	2.32877e+06	2.31459e+06	2.31406e+06	2.2814e+06	2.69863e+06	6934.42	2.56584e+06	6829.57	2806.58	4.60317e+06	2.67425e+06	30685.2	53255.6	5664.31	3.77528e+06	2.4371e+06
672	521.311	520.303	5.68271	100428	98508.1	104048	102113	108262	101337	104527	104220	331284	23144.8	294067	10128.2	10124.6	19920.7	181357	129758	172214	33432.9	192237	152633
673	521.915	656.883	0.798161	224305	217942	219441	218234	220987	215296	221649	223732	245147	265398	221682	242299	204587	256782	206446	137646	159599	163623	220272	197416
674	523.269	522.261	6.94924	172070	171139	162528	162135	160301	159575	156937	151624	261320	196493	360790	264299	182586	329261	179140	142244	166391	138129	189172	184823
675	523.363	522.356	10.829	1.01725e+06	1.02753e+06	966620	975435	1.016e+06	1.02301e+06	993438	928734	688165	1.66218e+06	1.7364e+06	2.09336e+06	2.03351e+06	583595	798993	1.53274e+06	1.11449e+06	1.21301e+06	831465	999529
676	525.238	524.231	6.02874	58446.1	55754.5	51447.6	51600.4	50509.5	53431.7	48895.1	49307.6	74417.7	0	70185.4	0	0	270408	99255.1	0	0	0	156520	47853.8
677	525.284	524.277	7.22292	1.10653e+07	1.25348e+07	1.27402e+07	1.25649e+07	1.22984e+07	1.24136e+07	1.17743e+07	1.19689e+07	1.76575e+07	1.48923e+07	2.16535e+07	1.71824e+07	1.41334e+07	1.7393e+07	1.34117e+07	1.14471e+07	1.33977e+07	9.28422e+06	1.41575e+07	1.47595e+07
678	525.284	524.277	7.3592	1.65006e+07	1.60937e+07	1.60356e+07	1.57417e+07	1.58031e+07	1.55686e+07	1.55413e+07	1.51294e+07	2.1951e+07	1.81515e+07	2.62815e+07	2.18608e+07	1.79314e+07	2.12107e+07	1.67078e+07	1.4843e+07	1.66108e+07	1.29604e+07	1.83002e+07	1.80006e+07
679	525.342	524.335	8.67325	596362	584812	602639	590842	592416	590215	574146	557011	312328	968675	380376	766447	750947	348137	348285	710123	674668	579572	290492	285517
680	526.277	525.269	3.92399	258699	250490	248829	240195	238955	240923	232847	239616	316451	2707.27	193875	0	0	462302	705406	137098	84080.6	1056.34	973743	294395
681	527.3	562.313	7.02864	1.98273e+06	1.94758e+06	1.9122e+06	1.87855e+06	1.87111e+06	1.79962e+06	1.79474e+06	1.73206e+06	2.68103e+06	1.43345e+06	3.09005e+06	1.67423e+06	1.32968e+06	3.99433e+06	2.65078e+06	966559	706888	1.68991e+06	2.93222e+06	4.53186e+06
682	527.3	526.293	7.9186	653896	609644	590765	594558	577004	560779	554772	536252	955579	547332	1.19428e+06	1.12689e+06	504114	1.36018e+06	737783	391037	454513	525547	904182	877769
683	527.321	526.314	7.56969	475148	461068	459587	464652	463452	479834	468944	463706	212467	917715	297625	762616	765739	187504	294215	927455	632460	593974	303305	300895
684	527.358	526.351	8.79176	3.28808e+06	3.31023e+06	3.31284e+06	3.27822e+06	3.29454e+06	3.2498e+06	3.22913e+06	3.08842e+06	1.58472e+06	5.41683e+06	2.0314e+06	4.53792e+06	4.21507e+06	1.60047e+06	1.70443e+06	2.89417e+06	3.12078e+06	3.47362e+06	1.4495e+06	1.66185e+06
685	527.873	594.853	0.813133	81523	83937.9	85108.5	83796.1	83981.4	77960	79972.6	78594.3	77668	78668	92351.2	87832.5	71881.4	79877.9	83044.1	69645.3	67442.5	89122.2	84300.4	91344.7
686	529.245	528.237	5.09788	121000	116391	116084	108510	104712	103176	104664	104129	170142	518.184	142510	0	1784.11	233722	242604	0	0	598.455	294704	121625
687	529.245	528.237	5.36339	426619	407875	402021	389708	376337	366781	369799	360016	626285	3481.58	607289	9791.25	2834.82	1.49424e+06	759125	13253.6	4522.93	5341.86	1.28784e+06	553650
688	529.27	528.263	4.01224	259588	262087	246776	250142	247950	245243	244172	243066	343815	0	318988	0	0	613849	675522	876.336	805.65	323.832	666482	276248
689	529.285	528.277	3.7322	233576	235920	234249	232511	232815	239144	228812	235549	268902	442090	418661	332729	454625	12419.9	0	199371	126826	371716	23462.4	439573
690	529.306	528.299	4.77508	278360	262777	245392	230910	229110	219704	211675	202808	251092	0	312203	0	315.6	1.00303e+06	240911	0	1301.57	0	966867	224043
691	529.316	564.33	7.45688	1.4296e+07	1.76939e+07	1.82283e+07	1.72549e+07	1.68588e+07	1.72863e+07	1.65523e+07	1.70452e+07	1.88258e+07	1.56758e+07	2.10314e+07	1.73617e+07	1.84957e+07	1.94556e+07	1.89573e+07	1.48822e+07	1.37405e+07	1.84681e+07	1.86113e+07	2.16633e+07
692	529.316	528.308	7.60095	8.732e+06	8.75151e+06	8.66445e+06	8.54416e+06	8.5379e+06	8.43512e+06	8.41958e+06	8.30124e+06	1.12487e+07	4.09649e+06	1.07527e+07	5.53661e+06	4.23149e+06	1.43852e+07	1.16598e+07	6.72138e+06	7.02328e+06	5.20899e+06	1.17274e+07	1.27699e+07
693	530.29	529.283	4.72268	277370	262356	268255	254505	252849	247160	241881	243671	313129	0	297931	0	0	1.0298e+06	566979	729.648	0	420.363	569658	198371
694	531.285	530.278	3.90126	1.62365e+06	1.59529e+06	1.56818e+06	1.55149e+06	1.56041e+06	1.53934e+06	1.53778e+06	1.53339e+06	1.13807e+06	13098.5	1.10469e+06	9127.09	15580.7	3.29447e+06	5.93301e+06	33793.8	54186.6	13293.3	5.32293e+06	1.42054e+06
695	531.285	530.278	4.00333	1.57519e+06	1.54851e+06	1.5176e+06	1.49681e+06	1.50502e+06	1.48936e+06	1.49448e+06	1.48199e+06	1.10498e+06	327.936	1.07731e+06	0	385.56	3.19652e+06	5.69544e+06	25676.9	51441.1	1464.19	5.12706e+06	1.36644e+06
696	531.332	530.324	8.07417	1.71758e+06	1.71595e+06	1.72479e+06	1.70817e+06	1.71283e+06	1.68416e+06	1.66044e+06	1.63595e+06	2.66517e+06	748505	2.67173e+06	1.06906e+06	1.2819e+06	2.86132e+06	2.28245e+06	1.03902e+06	779038	1.83386e+06	2.76612e+06	3.344e+06
697	532.305	531.298	4.82323	496597	504395	482029	462726	465899	460839	459211	448804	464815	0	480406	0	330.072	1.44063e+06	1.138e+06	0	0	0	1.17051e+06	390275
698	533.347	532.339	8.83157	1.01253e+06	1.01507e+06	1.01202e+06	970387	972822	969350	958398	912182	1.45293e+06	1.24739e+06	1.65983e+06	1.31727e+06	1.34353e+06	1.27601e+06	882683	603771	469137	1.27957e+06	950917	1.02285e+06
699	534.298	533.291	16.0484	2.21254e+06	2.21097e+06	2.05651e+06	2.0325e+06	1.93095e+06	1.87553e+06	1.7003e+06	1.68157e+06	2.85476e+06	3.6155e+06	1.97473e+06	2.71645e+06	2.7375e+06	2.10166e+06	1.36767e+06	2.78368e+06	2.99083e+06	1.55876e+06	2.41951e+06	1.54565e+06
700	535.362	534.355	9.98535	890198	899414	876389	857945	876096	880994	872582	835730	689416	1.32996e+06	875848	993236	1.14264e+06	366340	619311	1.06302e+06	839111	1.01165e+06	1.02428e+06	1.10899e+06
701	539.272	538.264	4.02197	42095.5	40844.9	39563.2	37896.1	39574.4	39688.9	40488	35655	0	159591	0	0	0	0	0	0	775.197	47478	7833.91	342.888
702	539.321	538.314	7.30593	3.93829e+06	3.93418e+06	3.94673e+06	3.89491e+06	3.93476e+06	3.92476e+06	3.96786e+06	3.82549e+06	1.49303e+06	3.88268e+06	2.1058e+06	3.43802e+06	3.23955e+06	1.57716e+06	6.3412e+06	5.20825e+06	4.27362e+06	7.53654e+06	4.72466e+06	7.27548e+06
703	539.327	538.32	6.05222	83532.5	87762.7	78849.9	72012.2	70760.6	63038.4	60414.5	62543.3	134185	9749.16	120480	0	0	471847	91267	0	468.36	0	240095	125964
704	541.279	540.272	5.79996	700059	680017	675818	679504	681417	672486	667963	677475	2.49544e+06	200524	1.90459e+06	201463	110918	196196	1.46481e+06	1.04308e+06	1.75932e+06	210265	1.01092e+06	1.35376e+06
705	541.279	540.272	5.89966	679798	658662	654376	654034	658783	647916	641324	654987	2.41085e+06	193055	1.85162e+06	196237	107194	194784	1.42918e+06	1.0049e+06	1.68185e+06	202856	986536	1.31328e+06
706	541.337	540.329	7.93377	4.46482e+07	4.86871e+07	4.9104e+07	4.76969e+07	4.72934e+07	4.82369e+07	4.73448e+07	4.74622e+07	3.78611e+07	5.76921e+07	4.48156e+07	5.86315e+07	5.69047e+07	3.89239e+07	4.75437e+07	4.50428e+07	4.65317e+07	5.77225e+07	4.31786e+07	4.91211e+07
707	541.337	540.329	8.00697	4.23399e+07	4.63695e+07	4.6511e+07	4.53821e+07	4.46913e+07	4.59609e+07	4.58742e+07	4.51732e+07	3.58118e+07	5.64234e+07	4.36252e+07	5.6221e+07	5.41458e+07	3.67705e+07	4.53851e+07	4.2823e+07	4.41929e+07	5.64858e+07	4.10638e+07	4.7072e+07
708	541.337	540.33	8.16891	9.25087e+07	9.28608e+07	9.20065e+07	9.11434e+07	9.03368e+07	9.0196e+07	8.95832e+07	8.79244e+07	8.62211e+07	1.23013e+08	9.47259e+07	1.16985e+08	1.1195e+08	7.7157e+07	8.69346e+07	8.3508e+07	8.3747e+07	1.06518e+08	7.54834e+07	8.24968e+07
709	541.337	540.329	8.32536	9.26345e+07	9.28596e+07	9.19956e+07	9.11182e+07	9.03156e+07	9.01273e+07	8.95102e+07	8.78945e+07	8.64149e+07	1.23149e+08	9.4731e+07	1.16942e+08	1.11793e+08	7.71768e+07	8.6932e+07	8.33981e+07	8.365e+07	1.06492e+08	7.54093e+07	8.24603e+07
710	542.34	541.333	8.02553	1.59366e+07	1.69614e+07	1.69529e+07	1.66295e+07	1.65088e+07	1.66823e+07	1.6501e+07	1.64184e+07	1.39509e+07	2.01624e+07	1.62244e+07	2.0055e+07	1.94612e+07	1.38041e+07	1.63552e+07	1.56465e+07	1.59319e+07	1.97103e+07	1.48803e+07	1.6556e+07
711	542.34	541.333	8.3166	2.68736e+07	2.69468e+07	2.66352e+07	2.63886e+07	2.61701e+07	2.61125e+07	2.59774e+07	2.54562e+07	2.52213e+07	3.66591e+07	2.78891e+07	3.45727e+07	3.28534e+07	2.23823e+07	2.5225e+07	2.41667e+07	2.42147e+07	3.12196e+07	2.17817e+07	2.39192e+07
712	543.295	542.287	6.3256	60034.4	63507.9	53881	56076.7	59915.3	56012.7	51996.8	58789.5	252318	10518.7	185363	19230.1	1074.41	22986.9	147250	95504.6	174640	17813.5	112073	150466
713	543.342	542.335	8.27152	5.01212e+06	4.97597e+06	4.95273e+06	4.88091e+06	4.85631e+06	4.84375e+06	4.82285e+06	4.72641e+06	4.70449e+06	6.82253e+06	5.15442e+06	6.43399e+06	6.10119e+06	4.16807e+06	4.68011e+06	4.47225e+06	4.49164e+06	5.75466e+06	4.00789e+06	4.45186e+06
714	545.311	544.303	6.02199	455595	460711	455942	438722	438759	443205	444084	440826	1.92456e+06	24269.3	1.36367e+06	19624.5	16016	164433	1.02977e+06	588612	885573	53750.3	873143	1.15432e+06
715	546.354	545.347	6.6176	26788.8	28053.5	26571.2	30530.8	25493.5	26680.8	26969.7	25858.5	15619.4	940.68	28567.4	0	0	56077.2	61409	4815.64	2851.3	1372.01	175706	79348.6
716	549.252	548.244	4.75846	315573	287702	297813	286796	283192	281362	275639	268043	118343	0	189972	0	320.928	956152	911573	1463.96	1288.8	0	719022	397030
717	551.3	550.292	7.09543	151992	151772	150527	153067	146223	140867	136393	139940	206005	78554.8	219632	98532.3	63093.3	465136	220198	57278.6	68011.3	104496	166078	175509
718	553.316	552.309	7.40839	6.78566e+06	6.73998e+06	6.75199e+06	6.64738e+06	6.663e+06	6.60458e+06	6.62843e+06	6.54922e+06	7.66398e+06	4.85227e+06	7.61587e+06	5.38852e+06	4.4599e+06	1.06758e+07	8.57543e+06	4.22592e+06	4.98169e+06	5.40217e+06	7.65756e+06	7.45902e+06
719	553.316	552.309	7.53753	6.7346e+06	6.69072e+06	6.70569e+06	6.59988e+06	6.61998e+06	6.55975e+06	6.58463e+06	6.50361e+06	7.56713e+06	4.79035e+06	7.53529e+06	5.33342e+06	4.42281e+06	1.05713e+07	8.50799e+06	4.19108e+06	4.95076e+06	5.36103e+06	7.60225e+06	7.40337e+06
720	553.337	552.33	7.87136	283414	287384	278959	284910	284903	275432	274491	266799	202126	357696	275748	354999	325170	195462	289867	356556	183902	353186	342052	406822
721	553.373	552.366	9.10852	2.29059e+06	2.31852e+06	2.29632e+06	2.27126e+06	2.29852e+06	2.27435e+06	2.27156e+06	2.14648e+06	1.18796e+06	3.60052e+06	1.60911e+06	3.88615e+06	3.23434e+06	892887	1.3173e+06	2.49326e+06	2.57384e+06	2.69796e+06	801749	1.11224e+06
722	554.028	688.996	0.790212	52710.2	51955.5	50392.3	50566.7	52724.4	49294.5	51711.1	52748	57300.7	38000.5	40988.1	42332.9	36923	36280.9	37325.9	96119.4	86888.5	40770.9	55451.8	36617.4
723	554.344	553.337	4.74805	133907	125384	128019	127025	123140	124178	119763	121035	153940	0	121068	0	0	257962	316884	0	0	0	501845	274608
724	555.322	554.315	4.69841	311123	289955	280473	271266	264065	256248	245913	246407	449702	1559.19	630537	428.328	0	973210	315831	2392.44	1578.89	1854.43	915085	356559
725	555.331	554.323	7.84236	430472	457421	442606	457956	451922	436018	423319	422322	659328	205501	683381	314002	215616	1.23225e+06	590352	179274	171559	298920	706999	723816
726	555.331	554.324	8.11986	238795	238954	239611	242343	237333	229497	223736	220530	444531	77041.9	348745	156043	71278	937008	378377	95186.5	99476.4	147346	449764	347952
727	555.352	554.345	8.88014	5.54434e+06	5.55481e+06	5.56195e+06	5.43792e+06	5.4391e+06	5.34287e+06	5.34913e+06	5.10061e+06	4.18205e+06	9.60936e+06	6.67134e+06	1.00048e+07	8.66702e+06	4.38687e+06	3.90711e+06	4.81141e+06	3.72137e+06	5.51806e+06	3.23668e+06	3.81615e+06
728	557.332	556.324	7.14833	206029	193637	202532	196823	193660	177540	191212	181193	377076	163779	407096	176988	139504	410343	472482	323613	315358	187872	396386	318258
729	563.321	562.313	7.1354	1.96659e+06	1.92917e+06	1.89062e+06	1.85617e+06	1.84823e+06	1.77601e+06	1.77403e+06	1.71093e+06	2.67601e+06	1.42322e+06	3.07429e+06	1.66406e+06	1.31347e+06	3.97018e+06	2.6179e+06	943248	690506	1.65838e+06	2.88435e+06	4.46729e+06
730	565.337	564.33	7.67451	4.78616e+07	4.76344e+07	4.72314e+07	4.66745e+07	4.61982e+07	4.58751e+07	4.57539e+07	4.51096e+07	6.03941e+07	4.83694e+07	6.13895e+07	4.74529e+07	4.95311e+07	5.38471e+07	4.9876e+07	3.67318e+07	3.22338e+07	4.8317e+07	5.18819e+07	5.40904e+07
731	565.337	564.329	7.92171	5.09385e+06	3.94966e+06	3.79546e+06	3.83294e+06	3.86463e+06	3.49962e+06	3.74911e+06	3.43259e+06	9.74578e+06	6.01477e+06	8.67521e+06	4.84064e+06	4.88199e+06	6.04512e+06	4.32602e+06	2.47461e+06	1.57127e+06	4.17704e+06	5.47244e+06	5.09587e+06
732	567.283	566.276	4.60044	360843	343092	340056	345456	341403	343210	336382	338584	410508	1190.11	296922	632.736	0	396950	556716	13295.2	22852	2742.72	612352	618894
733	567.352	566.345	8.25631	3.78034e+07	3.75812e+07	3.73846e+07	3.69785e+07	3.68287e+07	3.64814e+07	3.62492e+07	3.51315e+07	4.33751e+07	4.06487e+07	4.61125e+07	4.18434e+07	3.6058e+07	4.29429e+07	4.40541e+07	3.34959e+07	2.97862e+07	4.48026e+07	4.4826e+07	5.1878e+07
734	567.352	566.345	8.47222	3.74947e+07	3.72897e+07	3.71124e+07	3.67068e+07	3.65658e+07	3.62209e+07	3.59978e+07	3.48907e+07	4.27582e+07	4.02014e+07	4.55533e+07	4.13765e+07	3.57163e+07	4.25714e+07	4.36849e+07	3.32705e+07	2.95857e+07	4.4421e+07	4.44982e+07	5.14635e+07
735	568.305	567.298	4.89499	77891.3	80991.9	80490.5	74404.2	79937.5	80787.2	79679.9	79671.8	0	0	602.964	0	0	807.168	348069	0	0	0	502188	191903
736	569.272	568.265	7.26955	982898	963522	962147	934928	947933	918245	904537	888566	1.44978e+06	1.12642e+06	1.50155e+06	1.28464e+06	1.03683e+06	966454	840986	1.15396e+06	1.31827e+06	705353	969823	965900
737	569.31	568.303	5.98191	330284	323807	319213	315834	321177	319063	315452	308931	1.42761e+06	14722.6	1.08008e+06	9044.7	7181.77	155530	948396	208106	386542	23284.6	597880	665409
738	569.322	568.315	4.7706	33124.7	38116.1	31566.8	29663.6	31053.2	27262.5	26474.2	25498.2	0	0	7720.66	0	0	39695.1	27882.6	482.712	630	0	262580	39089.4
739	569.368	568.361	9.38736	9.03759e+07	9.12877e+07	9.08789e+07	8.95295e+07	8.99322e+07	8.9517e+07	8.90147e+07	8.6059e+07	9.53214e+07	1.21651e+08	1.21195e+08	1.4237e+08	1.26863e+08	8.44445e+07	8.57365e+07	7.23586e+07	7.84522e+07	1.03471e+08	6.587e+07	7.12666e+07
740	569.368	568.361	9.62949	9.3299e+07	9.39118e+07	9.32586e+07	9.17845e+07	9.23009e+07	9.16299e+07	9.11017e+07	8.79924e+07	1.01214e+08	1.27802e+08	1.26754e+08	1.4913e+08	1.31513e+08	8.70544e+07	8.77465e+07	7.37194e+07	7.98995e+07	1.05915e+08	6.68383e+07	7.25128e+07
741	569.368	568.361	9.78099	1.00236e+08	1.00264e+08	9.9098e+07	9.76377e+07	9.81018e+07	9.73079e+07	9.65703e+07	9.30979e+07	1.16606e+08	1.46459e+08	1.42691e+08	1.67524e+08	1.45193e+08	9.42567e+07	9.30465e+07	7.7443e+07	8.39345e+07	1.1195e+08	6.97284e+07	7.57287e+07
742	569.368	568.361	9.99378	9.87011e+07	9.73005e+07	9.57563e+07	9.45127e+07	9.48066e+07	9.35224e+07	9.30041e+07	8.92176e+07	1.15751e+08	1.44191e+08	1.39775e+08	1.62101e+08	1.39194e+08	9.0103e+07	8.80958e+07	7.35691e+07	7.89407e+07	1.0439e+08	6.58044e+07	7.1005e+07
743	569.368	568.36	10.1879	8.43031e+07	8.26459e+07	8.11645e+07	8.00483e+07	8.03443e+07	7.90702e+07	7.85363e+07	7.57753e+07	1.08406e+08	1.29252e+08	1.23755e+08	1.39895e+08	1.1967e+08	7.63075e+07	7.56693e+07	6.37242e+07	6.8653e+07	8.67669e+07	5.65538e+07	6.11381e+07
744	569.368	568.361	17.145	239876	238703	225581	200875	218544	209758	203421	202697	451396	630636	538184	704688	508104	244113	212719	138719	152300	269198	127230	128475
745	569.368	568.36	9.93587	7.0931e+07	6.87196e+07	6.74782e+07	6.68445e+07	6.69125e+07	6.46051e+07	6.53657e+07	6.25353e+07	8.36198e+07	9.68329e+07	9.46257e+07	1.02506e+08	9.05058e+07	5.86896e+07	5.95932e+07	5.18912e+07	5.40383e+07	6.55324e+07	4.56607e+07	4.79434e+07
746	570.371	569.364	9.77405	3.0239e+07	3.02986e+07	2.99231e+07	2.94906e+07	2.94801e+07	2.94387e+07	2.90949e+07	2.814e+07	3.4912e+07	4.39822e+07	4.29389e+07	5.0268e+07	4.38285e+07	2.83268e+07	2.80458e+07	2.3423e+07	2.5409e+07	3.38326e+07	2.10383e+07	2.28787e+07
747	571.374	570.367	9.7972	5.7002e+06	5.70596e+06	5.64238e+06	5.53618e+06	5.57904e+06	5.52465e+06	5.46985e+06	5.27681e+06	6.48951e+06	8.12782e+06	7.9883e+06	9.42789e+06	8.19147e+06	5.2671e+06	5.26186e+06	4.39776e+06	4.80628e+06	6.40562e+06	3.92588e+06	4.30806e+06
748	572.295	571.288	8.09518	566018	581010	577169	579089	581049	575735	591518	583090	271848	273921	244179	277183	248586	377141	461097	588251	535929	507226	650705	633163
749	578.381	577.373	8.07755	104653	108439	109367	106643	108054	106685	103427	97955.7	95930	19699.7	88424.3	5168.03	13106.2	414951	227276	55545.4	60572.8	21218.9	314667	102388
750	580.396	579.388	7.89313	70335.7	70818.1	69151.8	63523.5	65891.6	64952.8	61140.1	62650.1	58737.6	37756.8	40854.9	10512	28907.8	131016	134172	66979.3	42711.5	26862.4	185889	75046.5
751	581.332	580.324	5.67455	223994	241220	235094	234045	233645	235308	232727	231991	691046	57473.8	630357	25173.5	30223.1	47624.7	392298	278725	371666	87942.6	412059	337509
752	583.278	582.271	4.56739	2.11718e+06	2.0768e+06	2.06521e+06	2.03158e+06	2.03741e+06	2.08067e+06	2.08369e+06	2.09223e+06	2.27951e+06	18406.5	2.21236e+06	19252.4	4704.82	1.99868e+06	2.17737e+06	74267.7	95884.4	3986.76	1.96418e+06	2.1228e+06
753	583.383	582.376	10.7506	2.012e+06	2.01753e+06	1.91414e+06	1.88961e+06	2.00994e+06	2.0336e+06	1.95048e+06	1.81412e+06	1.55379e+06	3.65292e+06	3.63557e+06	4.25216e+06	4.0968e+06	1.13457e+06	1.56738e+06	2.99934e+06	2.19521e+06	2.33924e+06	1.67555e+06	1.98938e+06
754	583.384	582.376	10.8988	1.40602e+06	1.4291e+06	1.35078e+06	1.34887e+06	1.41867e+06	1.45451e+06	1.39886e+06	1.30976e+06	605187	1.76794e+06	2.0894e+06	2.73649e+06	2.78062e+06	782933	1.10748e+06	2.18101e+06	1.62763e+06	1.63784e+06	1.16761e+06	1.39742e+06
755	584.318	583.311	4.39673	24533.5	22955.5	25232.9	27019.6	23940.4	24565.3	24765.4	23132.3	2868.17	0	8943.04	0	0	6445.04	184757	23082.6	38867.2	0	70714.6	28173.3
756	585.269	584.261	5.8719	92165.9	98408	93839.2	84660.2	94401.5	89527.6	87043.8	97278.9	167632	35180.7	141661	16621.3	17054.2	3295.25	94479.8	197574	488149	27027.1	72438.9	87260.1
757	587.321	586.314	7.03085	528325	523002	513456	498089	518038	479151	489440	472986	721854	173903	722030	178219	139306	956381	831407	610433	502809	348048	1.34175e+06	1.54395e+06
758	589.337	588.33	7.45901	1.62137e+07	1.62285e+07	1.60712e+07	1.59428e+07	1.58455e+07	1.56814e+07	1.55318e+07	1.5494e+07	2.04357e+07	7.87545e+06	1.94213e+07	1.05951e+07	7.97701e+06	2.62224e+07	2.16076e+07	1.26645e+07	1.32648e+07	9.69005e+06	2.13774e+07	2.33487e+07
759	589.336	588.329	7.6007	1.63607e+07	1.61376e+07	1.59961e+07	1.5857e+07	1.5809e+07	1.57024e+07	1.55054e+07	1.53743e+07	2.07699e+07	7.88078e+06	1.95285e+07	1.05921e+07	7.94977e+06	2.59536e+07	2.13815e+07	1.25907e+07	1.31963e+07	9.6644e+06	2.13167e+07	2.28347e+07
760	591.352	590.345	8.07409	3.28597e+06	3.32417e+06	3.29232e+06	3.29885e+06	3.24176e+06	3.19991e+06	3.16146e+06	3.112e+06	5.15934e+06	1.43755e+06	5.0842e+06	2.0385e+06	2.48407e+06	5.48451e+06	4.29496e+06	1.99969e+06	1.49387e+06	3.46956e+06	5.33493e+06	6.42175e+06
761	592.324	591.317	5.65618	68190.3	66463.8	62703.3	55102.2	52503.6	49312.1	50638.6	45909.6	169252	4441.56	392528	0	358.032	263247	275096	955.752	333.96	3304.78	458279	633393
762	593.368	592.361	8.82954	2.0687e+06	2.07536e+06	2.05792e+06	1.99955e+06	2.00166e+06	1.94596e+06	1.9393e+06	1.8386e+06	2.9459e+06	2.46625e+06	3.37308e+06	2.65363e+06	2.74177e+06	2.60639e+06	1.82344e+06	1.23497e+06	964950	2.61834e+06	1.96223e+06	2.10494e+06
763	594.34	593.333	5.61194	217427	200498	188083	174581	166859	154849	148494	135087	918867	54879.4	1.01945e+06	2074.76	12555.1	1.01805e+06	803181	10723	2737.68	55705.5	1.137e+06	1.57151e+06
764	595.247	616.222	4.06529	269884	262082	251617	249485	244823	229217	224018	220849	544851	17924.2	310087	5437.86	0	673811	102292	790.929	0	0	222032	232290
765	595.383	594.376	9.98872	1.97353e+06	1.97005e+06	1.92359e+06	1.87134e+06	1.91595e+06	1.92709e+06	1.91375e+06	1.79881e+06	1.7802e+06	3.21595e+06	2.04228e+06	2.26427e+06	2.55487e+06	849962	1.3637e+06	2.30304e+06	1.82643e+06	2.15706e+06	2.28573e+06	2.39364e+06
766	595.402	594.394	10.8078	492427	479522	458931	461949	477969	467602	461628	451455	281612	481682	506613	472002	533562	674949	632769	149385	125259	589601	394503	637963
767	596.295	595.287	7.27446	550544	699434	651130	655939	633713	661083	611406	648811	721247	750755	538432	559385	777268	570711	440222	606295	392739	1.11256e+06	986229	1.35484e+06
768	596.295	595.288	7.52273	1.83425e+06	1.8362e+06	1.82438e+06	1.82492e+06	1.85694e+06	1.83589e+06	1.81277e+06	1.81731e+06	1.80792e+06	2.01588e+06	1.39499e+06	1.58753e+06	2.13204e+06	1.16736e+06	883881	1.23058e+06	735932	1.96848e+06	1.59646e+06	1.97293e+06
769	596.356	595.349	5.69425	62753.8	55142.5	55348.7	47821.1	48130.2	45216.6	40006.6	38961.2	135847	21461	198101	0	2940.69	320555	508938	3261.87	1701.71	71017.1	379140	470999
770	597.399	596.392	17.1486	252456	261680	254175	242590	229498	218174	201197	200646	16567.9	58639.3	110493	243346	540987	89001.5	43997.9	73019.3	52062.1	116262	71998.1	102275
771	598.31	597.303	8.54731	796991	809075	811150	802125	798340	812168	801009	774999	732169	553441	612013	493050	669158	424481	547074	794293	641349	604218	639439	753262
772	598.331	597.324	3.78914	161777	169727	174929	180522	191759	193784	201317	210943	21999.9	0	539.88	0	0	15366.5	881.496	22169.4	414.18	0	15130.1	6565.92
773	600.326	599.318	10.3732	9.57428e+06	9.74868e+06	9.53023e+06	9.54657e+06	1.00316e+07	1.02228e+07	1.02832e+07	9.69539e+06	4.53752e+06	5.89107e+06	4.06127e+06	5.34561e+06	4.03276e+06	6.35003e+06	6.32931e+06	6.37155e+06	6.34395e+06	3.65066e+06	6.2527e+06	4.60626e+06
774	600.326	599.319	10.4918	8.78012e+06	8.94862e+06	8.70792e+06	8.72406e+06	9.15936e+06	9.36521e+06	9.41749e+06	8.86887e+06	4.1382e+06	5.39001e+06	3.71265e+06	4.91837e+06	3.71888e+06	5.80762e+06	5.81148e+06	5.80048e+06	5.81221e+06	3.36389e+06	5.67219e+06	4.16815e+06
775	601.33	600.322	10.6007	2.89883e+06	2.93455e+06	2.86938e+06	2.86953e+06	3.03902e+06	3.06021e+06	3.05802e+06	2.93491e+06	1.36472e+06	1.76256e+06	1.19579e+06	1.58345e+06	1.19273e+06	1.88267e+06	1.87801e+06	1.90777e+06	1.88727e+06	1.06661e+06	1.85044e+06	1.36501e+06
776	605.332	604.324	6.02229	1.14247e+06	1.12582e+06	1.10844e+06	1.08144e+06	1.07937e+06	1.06141e+06	1.07874e+06	1.05546e+06	4.74857e+06	81148.7	3.3206e+06	68530.3	44494.9	409481	2.51459e+06	1.42237e+06	2.20868e+06	141300	2.11788e+06	2.8456e+06
777	605.331	604.324	6.03014	982149	956258	935798	919628	910728	900162	919700	888986	4.02408e+06	63226.8	2.81805e+06	55531	32149.3	340435	2.12038e+06	1.20894e+06	1.82803e+06	105389	1.81344e+06	2.43136e+06
778	605.331	604.324	6.09062	1.17793e+06	1.15558e+06	1.13629e+06	1.11296e+06	1.10307e+06	1.08523e+06	1.10241e+06	1.08327e+06	4.94815e+06	84361.7	3.4179e+06	68530.3	45165.7	426523	2.57921e+06	1.45708e+06	2.26333e+06	146736	2.16313e+06	2.89488e+06
779	605.877	604.87	0.807236	82973.3	82995.7	86926.8	85434.4	83403.5	85382.6	81219.4	86007.2	55088.5	90509.6	75264.4	81017.6	106274	95673.4	93241	56181.3	56253.7	79903.4	77556.9	89406.4
780	607.347	606.339	6.23617	111941	108119	104264	105342	109461	101272	100162	112076	450791	30955	387169	16116.3	30052.9	24105.4	225681	184236	234534	67377.9	197137	265556
781	607.347	606.34	6.26009	88349.8	89525.6	78104.2	80451.4	89992.3	79618.8	83313.9	101598	355543	26707.6	321404	15556	17878.8	18029.5	199633	160915	208118	63704.2	162964	240315
782	608.354	607.347	5.55945	48361.7	43038.3	41388.1	45374.4	44889.9	42733.6	41625	43489.6	36729.1	0	26363	0	0	117898	80274.6	163117	152453	0	117174	25568.2
783	609.324	608.317	8.10547	2.66501e+06	2.68956e+06	2.70059e+06	2.67741e+06	2.6229e+06	2.5625e+06	2.53453e+06	2.42687e+06	3.76102e+06	4.44019e+06	3.56072e+06	4.10827e+06	4.17034e+06	2.71155e+06	2.59773e+06	2.75137e+06	2.68345e+06	2.87955e+06	2.34732e+06	2.31387e+06
784	611.321	610.313	7.09546	383558	354829	364826	363022	349046	342093	351489	337666	524273	195752	551789	243902	177214	1.1227e+06	534950	144278	184749	257494	406818	431017
785	612.15	611.143	1.21638	87999.2	88432.7	82031.2	86103.7	78365.9	84442.7	78776	79131.7	160347	68866.8	312754	96147.4	179251	196917	56712.8	45575.1	41955.5	116441	69028.5	57479.6
786	613.336	612.329	7.39726	1.57819e+07	1.56405e+07	1.57356e+07	1.55505e+07	1.55956e+07	1.52846e+07	1.52318e+07	1.51262e+07	1.74773e+07	1.14968e+07	1.72405e+07	1.27096e+07	1.04732e+07	2.42882e+07	1.96761e+07	9.92617e+06	1.16631e+07	1.26883e+07	1.75158e+07	1.70657e+07
787	613.337	612.329	7.538	1.57466e+07	1.5614e+07	1.56904e+07	1.54961e+07	1.55484e+07	1.52439e+07	1.51851e+07	1.50781e+07	1.74302e+07	1.13977e+07	1.71611e+07	1.26346e+07	1.04097e+07	2.42027e+07	1.95962e+07	9.85986e+06	1.16273e+07	1.26403e+07	1.74787e+07	1.70225e+07
788	615.214	614.206	3.99911	87320.7	82552.1	79725.9	75698.9	74791	73406	67843.3	70705.7	161129	0	128492	0	0	354636	28849	398.16	0	0	53769.4	56133.5
789	615.352	614.345	7.84312	905616	966403	957805	950125	931095	929942	931349	894805	1.27131e+06	488794	1.43489e+06	711512	526649	2.3011e+06	1.20555e+06	408011	372526	656729	1.40989e+06	1.56772e+06
790	615.352	614.345	8.11672	535528	521380	509153	517529	507997	486616	488134	468343	977413	176089	749047	324073	180126	2.01109e+06	784725	210124	223724	319908	962745	746127
791	617.368	616.361	8.53054	360769	348336	346581	356453	355182	352567	347396	327133	473163	181262	473208	265586	164967	816228	453617	187543	190804	267391	440299	412281
792	620.294	619.287	7.30727	1.15927e+07	1.30329e+07	1.31249e+07	1.32434e+07	1.30765e+07	1.28755e+07	1.29454e+07	1.28181e+07	8.83239e+06	1.29335e+07	7.40106e+06	1.07371e+07	1.06162e+07	1.17684e+07	1.07046e+07	1.03835e+07	8.50267e+06	1.90141e+07	1.41536e+07	1.60482e+07
793	620.294	619.287	7.53237	1.94369e+07	1.94946e+07	1.93842e+07	1.93579e+07	1.9652e+07	1.94867e+07	1.95212e+07	1.95636e+07	1.26117e+07	1.90582e+07	1.04618e+07	1.60704e+07	1.55603e+07	1.53686e+07	1.36784e+07	1.37751e+07	1.07666e+07	2.4037e+07	1.73367e+07	1.8517e+07
794	621.298	620.291	7.5583	6.24877e+06	6.26685e+06	6.2733e+06	6.22967e+06	6.29323e+06	6.24845e+06	6.28407e+06	6.27636e+06	4.05876e+06	6.16802e+06	3.37008e+06	5.197e+06	5.00712e+06	4.93568e+06	4.37601e+06	4.41008e+06	3.43248e+06	7.75199e+06	5.56296e+06	5.94458e+06
795	622.31	621.303	8.07533	554005	543990	554949	533566	542279	530253	543715	521209	573824	373406	441054	362111	466702	436850	319766	462053	252166	675224	704686	810080
796	628.505	627.497	15.3922	594594	548808	523758	493419	468824	448036	440912	420458	676392	872168	1.15063e+06	1.11169e+06	991754	749426	571244	429610	313304	644620	519517	715190
797	629.331	628.324	5.98223	985519	954036	938458	931175	923659	919419	902310	913108	4.21755e+06	75155.4	3.14186e+06	47004.5	29881.9	455030	2.81494e+06	603966	1.14069e+06	92581.9	1.78326e+06	1.92666e+06
798	630.52	629.513	15.5977	556425	542015	534548	503367	509227	502187	471397	450588	415494	535668	769348	724591	540824	511680	822643	1.2271e+06	975007	746114	754055	713476
799	631.347	630.339	6.42328	108841	100076	99932.5	92367.4	95430.2	92072.8	93230	93875.9	547036	960.6	379516	1084.97	881.136	75247.7	352278	64164.5	131455	3624.53	237712	241015
800	633.324	632.316	7.72979	1.47419e+06	1.4611e+06	1.47454e+06	1.45708e+06	1.43137e+06	1.40252e+06	1.394e+06	1.33862e+06	1.9873e+06	2.07241e+06	1.83831e+06	1.9479e+06	2.07524e+06	1.48141e+06	1.42359e+06	1.48384e+06	1.33898e+06	1.6136e+06	1.40292e+06	1.3403e+06
801	636.289	635.281	5.87736	393086	386928	380492	374646	389822	385953	395735	392016	561297	269932	421096	156347	165298	77987.9	519274	679784	839042	511808	416765	589871
802	643.401	642.394	10.1096	286211	278541	266700	266127	255696	262387	266610	265652	81008.4	228537	223925	233836	312241	493845	374246	48434	31703.7	272490	219571	292507
803	644.294	643.287	7.47373	491513	505578	500095	493204	503611	502217	496160	496093	344510	494940	265294	436567	392281	497764	332912	414827	325827	673605	482210	523624
804	646.515	645.508	13.8381	141829	141368	138527	136562	124448	115865	115172	102930	167417	222298	307638	296350	207178	169396	174012	175557	130775	173848	145580	187695
805	647.432	646.425	11.0159	445301	412608	400834	394152	401241	432409	424959	403541	107079	464837	414652	458387	476298	486761	631687	96300.2	87963	567310	329142	518864
806	651.464	650.456	12.0478	68402.9	67575.5	61224.6	61622.1	76068.3	60075.2	64663.3	55533.2	92075.3	83119.8	126441	105204	85082.7	187746	35064.9	4177.9	3749.47	44951.8	31922.4	52931.3
807	657.89	724.871	0.79797	123934	118557	118943	114861	124498	121998	122948	124336	138676	147250	121358	131675	117430	145548	117870	74354.3	85577.9	86631.6	119079	110113
808	658.326	657.319	3.73279	85845.2	88473.2	87118.3	84778.8	86018.5	84724.9	81825.6	87188	154673	143439	184757	138138	185302	8089.4	1716.07	148140	58595.1	160651	28495.4	209753
809	661.173	660.165	5.67664	1.04913e+06	1.01197e+06	960143	932991	908690	875489	844359	821651	2.11392e+06	1.23681e+06	997049	205171	545674	2.29575e+06	1.08961e+06	1.77793e+06	2.66552e+06	1.02229e+06	4.02254e+06	4.11518e+06
810	661.347	660.34	4.05175	160214	157775	154002	149147	148033	137997	143402	141946	288070	0	206670	0	0	298659	219503	0	0	0	589393	269978
811	667.065	666.058	10.9886	828004	801573	743224	737633	745408	770818	744993	704325	2.93769e+06	2.36757e+06	99418.7	811343	342498	707396	573210	198243	82158.2	133257	213253	104442
812	699.562	744.56	14.9325	349517	322350	335885	360905	261590	255879	244575	247569	178990	112066	125498	242876	140784	248291	458950	315102	579154	256383	355238	154502
813	748.571	747.563	8.73125	7.19857e+06	7.58516e+06	6.63667e+06	915229	346218	6.68679e+06	6.23908e+06	5.00804e+06	0	374.139	0	0	48588.7	4.94385e+06	6.8383e+06	7.2914e+06	5.83301e+06	4.55361e+06	3.58768e+06	4.79205e+06
814	748.571	747.563	9.23078	7.59897e+06	8.04048e+06	7.00269e+06	989806	387129	7.25965e+06	6.65749e+06	5.32804e+06	0	374.139	341.688	357.144	77433	6.59819e+06	7.71884e+06	8.58254e+06	6.77987e+06	4.72267e+06	3.91552e+06	5.02288e+06
815	748.571	747.564	10.2897	5.02418e+06	5.25133e+06	4.22224e+06	674133	321130	5.09663e+06	4.79383e+06	3.96546e+06	0	374.139	341.688	732.288	65730.9	8.51123e+06	6.10873e+06	7.14962e+06	7.14553e+06	3.68117e+06	6.15323e+06	4.70557e+06
816	748.571	747.564	17.1507	863423	773785	96289.5	18409.2	731988	767430	651826	608545	0	0	0	991.251	391.032	875709	779894	634317	641877	400725	607635	475346
817	761.519	760.511	17.1506	144462	466053	618342	660011	677018	675789	635563	207993	0	0	0	0	0	329.472	0	0	0	0	0	0
818	803.565	802.558	17.1428	469290	398187	418691	356444	70907.9	8161.91	2.88618e+06	3.24115e+06	332.424	0	0	0	0	0	4.09936e+06	3.89563e+06	3.59943e+06	2.40577e+06	2.9351e+06	2.15307e+06
819	805.581	804.574	6.63094	824062	874217	889337	1.96894e+06	2.37452e+06	2.35746e+06	2.46503e+06	2.71283e+06	0	0	0	0	0	0	5613.31	0	0	851490	2.13427e+06	1.92969e+06
820	815.565	814.557	7.97361	3.18069e+06	3.21827e+06	3.16848e+06	3.16865e+06	3.15513e+06	3.11941e+06	3.12746e+06	3.00061e+06	1.75479e+06	3.17133e+06	2.64534e+06	3.09511e+06	2.73565e+06	3.05514e+06	3.19417e+06	2.91116e+06	3.11774e+06	3.23102e+06	1.80235e+06	2.51019e+06
821	827.565	826.557	10.2682	770960	711440	597274	306518	20800.5	1.45586e+06	1.11426e+07	1.12826e+07	0	0	0	0	5907.43	3.63694e+06	1.58571e+07	1.55245e+07	1.2109e+07	4.38728e+07	1.29449e+07	3.90109e+07
822	827.565	826.557	10.6658	442959	424599	356378	149456	17166.5	1.17106e+06	8.96937e+06	1.00643e+07	0	0	0	0	5167.76	2.52179e+06	1.35189e+07	1.34794e+07	1.0797e+07	3.70209e+07	1.12995e+07	3.1169e+07
823	827.565	826.558	17.1428	72384	61254.9	48133.5	1650.31	107107	892051	527462	445905	0	0	0	0	0	2.0812e+06	626972	434770	267164	417834	195770	317775
824	828.568	827.561	11.1397	270400	354958	280361	30933.5	1447.75	3.47376e+06	9.0021e+06	8.92896e+06	0	371.25	326.16	0	383.16	1.49419e+06	1.21025e+07	1.02073e+07	7.77763e+06	2.07365e+07	6.99466e+06	1.68687e+07
825	828.568	827.561	11.324	354436	464505	373636	31374.3	4629.48	5.04193e+06	1.05406e+07	1.00868e+07	0	371.25	326.16	0	383.16	1.59366e+06	1.37632e+07	1.12384e+07	8.46688e+06	2.18765e+07	7.46878e+06	1.77413e+07
826	831.596	830.589	17.1493	262881	274877	535873	632644	584705	609969	511006	405915	0	0	0	0	0	0	20597.6	18605.1	77494	1.46998e+06	1.55627e+06	1.5833e+06
827	834.522	833.515	17.0966	352605	343094	264106	278411	238504	49566.6	5841.31	138209	0	0	0	0	0	0	23940.6	584461	333776	370058	356671	236301
828	836.538	835.531	17.0967	438282	458050	416202	754786	907565	805371	827288	598405	0	0	0	353.904	568.152	0	679.752	34959.1	32377.1	59770.8	62533.5	50729.3
829	836.538	835.531	17.1408	418073	441868	401140	726767	868748	770913	791548	573465	0	0	0	353.904	568.152	0	679.752	22854.7	22783.6	58765	61321.7	49851.8
830	839.565	838.557	7.59918	122443	123003	123147	121275	121777	117237	114837	121809	85972.6	74531.3	166824	58357.8	83959.2	54829.9	182117	69624.1	110935	98981.1	54069.8	95138.1
831	839.566	838.558	7.9404	319869	322187	317363	315199	314836	316022	313766	316654	496535	232235	459668	177765	212271	355857	438046	231686	347711	304854	227324	308402
832	841.58	840.573	8.37925	109540	108210	109343	104700	108122	100564	96314.5	105939	118441	115152	119665	126757	66900.2	108487	128477	100287	179979	108964	47637.7	72421.4
833	851.601	850.594	9.68859	611395	589306	570919	581191	571259	551337	578462	533956	359034	700717	363520	675605	612782	840219	556863	393714	417430	620556	417351	346252
834	852.608	851.601	9.69593	321946	313446	305601	304820	305734	297241	309824	283275	195776	365868	188096	348900	327743	449648	290626	206410	216386	333966	215470	178578
835	855.596	854.588	17.1381	60440.7	48314.6	44581.5	40924.8	29614.5	7570.22	5522.17	16407	0	0	0	0	0	6719.3	37923.9	1.56342e+06	1.04909e+06	832447	812949	562456
836	858.523	857.516	17.1157	207042	182976	169588	146569	25449.8	5427.47	1.09319e+06	1.07345e+06	0	0	0	0	0	5639.99	1.25611e+06	570240	682483	403191	415281	428912
837	862.554	861.546	17.0966	492269	537608	500621	865410	1.02538e+06	1.09324e+06	1.03763e+06	907925	0	0	0	0	0	0	0	12380.1	12100.2	23667.7	212908	387538
838	862.554	861.547	17.1394	546388	590412	554786	960540	1.1387e+06	1.20998e+06	1.15567e+06	1.00454e+06	0	0	0	0	0	0	0	11438.6	10375.3	23667.7	232049	422991
839	863.565	862.557	7.85301	278559	261486	255002	250428	301783	339924	344301	324143	472215	277326	357669	152586	150033	244167	268858	123493	160927	171460	164882	238294
840	879.596	878.589	10.9221	348149	237825	181841	157087	16978.6	56686.4	87180.1	258699	0	0	0	0	0	74745.2	227202	2.96538e+06	2.51823e+06	5.38858e+06	4.11e+06	5.56769e+06
841	879.596	878.589	17.1356	20161.5	23390	16424.7	7378.16	16413.4	1063.87	2884.75	319879	348.36	0	0	0	0	8642.54	597986	362377	226646	207365	135760	144434
842	885.542	884.535	17.093	522753	441690	428475	388302	82556.6	8722.87	184698	219511	0	0	0	0	0	9296.83	221346	138210	140052	108228	89497.2	116634
843	886.553	885.546	17.0934	1.58404e+06	1.59249e+06	1.5208e+06	1.30337e+06	1.17618e+06	1.10323e+06	929371	949346	0	0	0	0	0	1053.79	51296	32173.3	189795	8.33456e+06	5.63952e+06	7.82171e+06
844	886.554	885.546	17.139	1.44819e+06	1.46105e+06	1.39688e+06	1.20026e+06	1.08227e+06	1.01111e+06	851319	866561	0	0	0	0	0	1053.79	46624.2	32173.3	188628	7.63013e+06	5.20394e+06	7.15507e+06
845	888.56	887.553	17.0948	414465	372652	365309	374749	439137	434252	378761	243045	0	0	0	0	0	0	0	0	18219.8	988637	681065	950792

## Sheet: Tumor ESI+
CompID	CompMW	MZ	Time	II_qc1	II_qc2	II_qc3	II_qc4	II_qc5	II_qc6	II_qc7	II_qc8	II_HFD_1	II_HFD_2	II_HFD_3	II_HFD_4	II_HFD_5	II_HFD_6	II_LFD_1	II_LFD_2	II_LFD_3	II_LFD_4	II_LFD_5	II_LFD_6
1	119.999	61.0068	17.1676	1.02197e+06	983154	1.00388e+06	1.01652e+06	978002	927885	883183	818436	844462	860846	856845	856944	835254	842044	806801	839152	832680	841524	849477	869850
2	60.032	61.0393	0.999145	2.408e+06	2.41069e+06	2.34189e+06	2.31583e+06	2.37593e+06	2.37488e+06	2.29731e+06	2.32423e+06	1.71919e+06	3.68683e+06	3.79493e+06	1.93054e+06	2.31759e+06	2.07009e+06	2.95018e+06	2.00042e+06	2.09734e+06	3.26594e+06	1.80784e+06	1.84396e+06
3	63.0079	64.0152	17.0443	9.96993e+06	8.14624e+06	7.48323e+06	7.795e+06	7.64855e+06	6.9378e+06	6.53976e+06	6.33378e+06	6.47464e+06	6.43134e+06	6.59505e+06	6.26173e+06	6.51138e+06	6.26105e+06	6.25011e+06	6.05125e+06	6.13649e+06	6.42381e+06	6.3572e+06	6.48771e+06
4	138.01	70.0121	17.1658	2.79607e+06	2.88811e+06	2.93027e+06	2.9289e+06	2.8897e+06	2.81975e+06	2.77944e+06	2.73655e+06	2.92433e+06	2.87722e+06	2.92753e+06	2.92803e+06	2.87403e+06	2.91873e+06	2.7455e+06	2.76361e+06	2.8559e+06	2.83597e+06	2.87362e+06	2.85558e+06
5	69.0573	102.091	0.8975	6.14902e+06	6.15032e+06	6.13904e+06	6.09052e+06	6.15579e+06	6.28368e+06	6.22573e+06	6.19652e+06	143123	342396	328913	198127	436825	233931	5.78394e+06	217400	259151	332786	190873	414660
6	140.043	71.0288	0.75969	181709	155204	182652	167234	155028	163166	153895	152691	292080	168229	104065	214831	272513	245034	113834	291973	281430	234004	317840	200743
7	71.0727	104.106	1.01742	8.20006e+07	8.22317e+07	8.21709e+07	8.19388e+07	8.24792e+07	8.20967e+07	8.1734e+07	8.19779e+07	4.53201e+07	5.25604e+07	4.94658e+07	4.64942e+07	6.32939e+07	5.07532e+07	1.30023e+08	5.14588e+07	4.83017e+07	5.75815e+07	4.81647e+07	5.26752e+07
8	71.0727	104.106	1.131	8.17058e+07	8.19594e+07	8.19332e+07	8.16826e+07	8.22283e+07	8.18302e+07	8.14667e+07	8.17347e+07	4.52484e+07	5.24809e+07	4.93918e+07	4.64244e+07	6.31936e+07	5.06916e+07	1.29182e+08	5.13599e+07	4.82257e+07	5.74571e+07	4.81069e+07	5.25929e+07
9	71.0732	72.0804	1.20887	6.33917e+06	6.49982e+06	6.65098e+06	6.71762e+06	6.72896e+06	6.86745e+06	6.88071e+06	6.85077e+06	5.39694e+06	6.12222e+06	5.31344e+06	5.03157e+06	6.01713e+06	4.79157e+06	6.50705e+06	6.23962e+06	3.82216e+06	4.78538e+06	5.27788e+06	4.6992e+06
10	145.048	73.5314	0.762386	231231	203969	213464	199681	183871	208778	187791	181278	366046	198984	113143	253058	332003	291054	136371	345400	348945	277856	410095	219013
11	145.048	73.5312	17.142	264185	240725	224789	230392	223048	225008	203149	198509	199345	197136	210007	192983	198476	202845	209893	197849	210192	201682	199655	203543
12	156.02	79.0173	17.1626	1.56293e+06	1.60248e+06	1.67599e+06	1.72271e+06	1.69984e+06	1.68172e+06	1.78564e+06	1.87946e+06	1.97186e+06	1.95387e+06	1.97555e+06	1.95808e+06	1.89198e+06	1.97158e+06	1.92861e+06	1.87999e+06	1.96559e+06	1.95942e+06	1.97383e+06	1.92687e+06
13	79.0417	80.049	1.21991	1.4149e+06	1.3899e+06	1.42342e+06	1.40352e+06	1.45529e+06	1.44222e+06	1.42937e+06	1.41288e+06	634139	672109	764311	718675	731509	691253	1.15399e+06	833150	653339	704388	592073	623794
14	79.0417	80.049	17.0911	1.05728e+06	793365	693494	695756	627867	633603	555926	572642	550465	582575	541703	546995	550360	529851	522422	561764	539141	560019	545145	594732
15	80.0621	161.132	9.93329	919715	918049	950067	928389	887248	818678	657919	637656	150710	150229	170230	164856	167897	153017	206883	141875	132543	151162	154014	129895
16	161.026	81.5201	17.1676	9.76107e+06	9.20022e+06	9.31261e+06	9.29825e+06	8.89681e+06	8.67781e+06	7.89293e+06	7.48485e+06	7.67563e+06	7.63336e+06	7.80926e+06	7.64655e+06	7.56679e+06	7.67924e+06	7.39439e+06	7.33359e+06	7.54074e+06	7.64132e+06	7.67379e+06	7.62221e+06
17	81.0058	82.5367	0.759196	2.22857e+06	1.9731e+06	2.10657e+06	1.9605e+06	1.83497e+06	1.969e+06	1.82886e+06	1.80714e+06	3.56948e+06	1.99103e+06	1.1451e+06	2.50675e+06	3.25413e+06	2.88007e+06	1.31445e+06	3.46481e+06	3.16066e+06	2.72776e+06	3.74515e+06	2.18539e+06
18	162.029	82.0217	17.1692	544643	519307	506204	514609	500138	486120	435711	408481	410706	431934	428449	404559	419561	417631	399642	397352	390960	414752	409324	407272
19	163.059	82.5367	0.759264	2.22857e+06	1.9731e+06	2.10657e+06	1.9605e+06	1.83497e+06	1.969e+06	1.82886e+06	1.80714e+06	3.56948e+06	1.99103e+06	1.1451e+06	2.50675e+06	3.25413e+06	2.88007e+06	1.31445e+06	3.46481e+06	3.16066e+06	2.72776e+06	3.74515e+06	2.18539e+06
20	163.058	82.5364	17.1482	1.40032e+06	1.3495e+06	1.37819e+06	1.42212e+06	1.40271e+06	1.39406e+06	1.4247e+06	1.48027e+06	1.57024e+06	1.4961e+06	1.49288e+06	1.50783e+06	1.5072e+06	1.52756e+06	1.4712e+06	1.47704e+06	1.55945e+06	1.50289e+06	1.52834e+06	1.47983e+06
21	164.06	83.0371	0.762131	274592	229530	235041	223871	207222	243537	200495	206192	434788	224589	131316	285247	384932	341939	154927	415711	373090	330146	445310	260567
22	165.056	83.5355	0.758882	312169	281366	302647	274234	255766	280141	254269	267164	526953	293478	157275	360503	464770	425099	195383	505625	475541	410302	555936	308875
23	83.0732	84.0804	0.784269	2.11324e+06	2.18407e+06	2.14616e+06	2.08454e+06	2.10037e+06	2.12758e+06	2.09244e+06	2.0441e+06	1.5965e+06	1.55354e+06	1.38629e+06	1.40261e+06	1.69647e+06	1.34938e+06	1.96717e+06	1.77832e+06	1.23475e+06	1.29541e+06	1.53257e+06	1.46894e+06
24	83.0731	84.0804	1.82543	1.75869e+06	2.29508e+06	2.19455e+06	2.09606e+06	2.26483e+06	2.28806e+06	2.3002e+06	2.30959e+06	2.55612e+06	2.30843e+06	2.86166e+06	2.85306e+06	2.60531e+06	2.58688e+06	2.15421e+06	1.94905e+06	3.43518e+06	2.04331e+06	2.76961e+06	2.65885e+06
25	84.0206	85.0279	1.21753	237400	232037	230498	238629	233349	258255	243966	244961	424415	302291	228167	309974	240401	304833	663359	302277	251569	454292	341718	337349
26	85.0887	86.096	0.944549	4.76785e+06	4.51389e+06	4.64269e+06	4.51051e+06	4.60089e+06	4.23804e+06	4.4724e+06	4.60654e+06	3.7554e+06	3.204e+06	2.7579e+06	3.23172e+06	3.53003e+06	2.82812e+06	3.9148e+06	3.9263e+06	2.08612e+06	2.64406e+06	3.2433e+06	2.77471e+06
27	85.0887	86.096	1.41135	6.98661e+07	7.02858e+07	7.08858e+07	7.06006e+07	7.13544e+07	7.34245e+07	7.36085e+07	7.15918e+07	6.37054e+07	5.91176e+07	5.55635e+07	5.88136e+07	6.26101e+07	5.5254e+07	7.38031e+07	6.92664e+07	4.50379e+07	5.35299e+07	5.94387e+07	5.46496e+07
28	86.092	87.0993	1.38975	3.57687e+06	3.61339e+06	3.67317e+06	3.6566e+06	3.6816e+06	3.79854e+06	3.75409e+06	3.67294e+06	3.20466e+06	2.98993e+06	2.82302e+06	3.00509e+06	3.17617e+06	2.77224e+06	3.82848e+06	3.53764e+06	2.18611e+06	2.68085e+06	2.9949e+06	2.7606e+06
29	88.0006	89.0079	17.1775	1.2218e+06	1.00797e+06	986139	990708	932076	951550	909941	833657	759503	757736	784816	775737	760661	779543	841383	783318	749555	744251	765098	759972
30	176.998	89.5063	17.3086	4.79442e+07	4.91536e+07	4.8725e+07	4.88154e+07	4.87036e+07	4.93597e+07	4.98832e+07	4.88279e+07	4.70226e+07	4.78011e+07	4.76555e+07	4.76318e+07	4.75547e+07	4.81837e+07	4.49657e+07	4.9045e+07	4.86922e+07	4.8625e+07	4.74064e+07	4.75691e+07
31	178.001	90.008	17.349	2.75957e+06	2.80567e+06	2.78542e+06	2.78694e+06	2.77264e+06	2.8923e+06	2.89367e+06	2.85074e+06	2.69603e+06	2.75854e+06	2.73235e+06	2.75222e+06	2.75069e+06	2.78212e+06	2.58324e+06	2.84191e+06	2.86534e+06	2.81981e+06	2.70893e+06	2.77589e+06
32	89.0472	90.0545	0.97609	8.63498e+06	8.7352e+06	8.82365e+06	8.71646e+06	8.89e+06	8.85218e+06	8.93806e+06	9.0655e+06	7.41155e+06	6.7521e+06	6.92623e+06	7.97883e+06	8.03826e+06	6.88443e+06	4.80343e+06	8.23612e+06	6.90377e+06	7.40153e+06	7.59761e+06	7.16296e+06
33	178.998	90.5065	17.1764	1.07382e+07	9.75227e+06	9.53523e+06	9.52809e+06	9.24116e+06	9.03499e+06	8.58502e+06	8.20107e+06	8.07261e+06	7.931e+06	8.08687e+06	7.98995e+06	7.87181e+06	7.86976e+06	8.15696e+06	7.989e+06	8.11691e+06	8.16772e+06	8.09484e+06	8.03328e+06
34	178.998	90.5064	17.3668	1.17244e+07	1.0852e+07	1.06999e+07	1.06515e+07	1.03135e+07	1.01046e+07	9.64697e+06	9.29567e+06	9.12788e+06	9.04842e+06	9.09927e+06	9.04732e+06	8.916e+06	8.93031e+06	9.18157e+06	9.096e+06	9.18566e+06	9.27038e+06	9.13417e+06	9.10183e+06
35	89.969	90.9763	0.817242	245820	230235	230094	225637	217481	198903	213853	207821	397496	457708	364630	476178	471458	762611	247563	439238	958745	471656	708838	807960
36	89.969	90.9763	17.0702	3.74953e+06	1.91488e+06	1.724e+06	1.90702e+06	1.79981e+06	1.76944e+06	1.45185e+06	1.25331e+06	1.17336e+06	1.21712e+06	1.17544e+06	1.13462e+06	1.15043e+06	1.16978e+06	1.07023e+06	1.10656e+06	1.07969e+06	1.22393e+06	1.10786e+06	1.26057e+06
37	90.0465	91.0538	0.924968	707123	706658	682300	694048	695780	678846	672195	682968	842603	728712	654428	747467	813745	709892	731303	849940	612968	737234	795852	706060
38	90.0465	91.0538	1.22171	4.23814e+06	4.25827e+06	4.25364e+06	4.21713e+06	4.17278e+06	4.28769e+06	4.24922e+06	4.2105e+06	5.4882e+06	5.17053e+06	4.45088e+06	5.01766e+06	5.67638e+06	4.79782e+06	5.75694e+06	6.15716e+06	4.14957e+06	4.83278e+06	5.33379e+06	5.27571e+06
39	90.0464	91.0536	1.97276	7.57592e+06	7.61842e+06	7.62938e+06	7.51592e+06	7.77931e+06	7.7931e+06	7.6317e+06	7.59033e+06	6.98025e+06	6.11881e+06	5.82538e+06	6.36377e+06	6.59015e+06	6.07377e+06	7.77729e+06	7.60149e+06	5.40636e+06	5.79762e+06	6.62113e+06	6.14105e+06
40	90.0464	91.0536	3.39217	2.22515e+06	2.18136e+06	2.1905e+06	2.20856e+06	2.28091e+06	2.20031e+06	2.20699e+06	2.21401e+06	2.26114e+06	2.05254e+06	2.00908e+06	2.11049e+06	2.21774e+06	2.18646e+06	2.71339e+06	2.4986e+06	2.06933e+06	2.143e+06	2.2255e+06	2.1064e+06
41	90.0438	304.175	3.43484	4.68861e+06	4.72727e+06	4.59405e+06	4.56499e+06	4.4597e+06	4.68759e+06	4.45522e+06	4.3795e+06	11696.5	23163.7	19916.1	19470.9	16112	2836.62	74902.6	23665.7	9815.63	28439.1	19941.8	53166.3
42	90.0465	91.0538	9.93589	2.38425e+06	2.49942e+06	2.49848e+06	2.37236e+06	2.24998e+06	2.10644e+06	1.7086e+06	1.60666e+06	293370	325704	304158	315553	390940	319536	477912	300710	233234	276233	252910	309135
43	90.4967	91.504	17.1733	3.74918e+06	3.41162e+06	3.38542e+06	3.38821e+06	3.2292e+06	3.18425e+06	2.98556e+06	2.81999e+06	2.69684e+06	2.71378e+06	2.76191e+06	2.73123e+06	2.73639e+06	2.72739e+06	2.84148e+06	2.75245e+06	2.73526e+06	2.77764e+06	2.75292e+06	2.76088e+06
44	91.0418	92.0491	3.98472	795426	805655	794178	807491	826600	817657	788743	786542	472.608	956.592	0	534.024	0	0	12372.1	526.416	527.175	496.464	441.144	0
45	91.0499	92.0571	1.22125	283672	274998	274034	267859	269831	275175	279815	272387	363282	340572	280409	325917	387715	313030	380900	405818	270497	312375	342572	337818
46	92.0622	93.0695	2.02756	1.55814e+06	1.59967e+06	1.60061e+06	1.56566e+06	1.62267e+06	1.64656e+06	1.5857e+06	1.59901e+06	1.45345e+06	1.2602e+06	1.15235e+06	1.30804e+06	1.35817e+06	1.22127e+06	1.59272e+06	1.61359e+06	1.04415e+06	1.14892e+06	1.37984e+06	1.23354e+06
47	186.075	94.0447	0.758614	382340	344512	360857	328986	307824	321283	305722	302797	612905	337373	193833	406651	551253	500546	227576	602887	540565	475149	637922	368886
48	186.074	94.0444	17.1487	417449	385898	390455	383118	381008	352570	363869	388161	371299	363769	368448	373074	380288	380343	359987	371177	374675	380665	377818	387909
49	93.0574	94.0647	1.86328	998744	1.03399e+06	1.03208e+06	978469	990310	1.01452e+06	998209	966003	320223	335793	324511	305063	344570	315067	1.69964e+06	369584	305252	294789	317592	301701
50	94.0412	182.08	1.22174	1.22244e+07	1.21415e+07	1.21837e+07	1.20155e+07	1.20343e+07	1.24097e+07	1.22864e+07	1.21124e+07	1.60156e+07	1.55559e+07	1.3147e+07	1.47965e+07	1.77061e+07	1.45182e+07	1.67227e+07	1.74093e+07	1.28412e+07	1.41034e+07	1.60684e+07	1.60058e+07
51	94.0415	95.0487	1.9072	8.29718e+06	8.3158e+06	8.32537e+06	7.99073e+06	8.20984e+06	8.25706e+06	8.02172e+06	7.85821e+06	7.20117e+06	6.5405e+06	5.98481e+06	6.74294e+06	6.96714e+06	6.29969e+06	7.68779e+06	7.67237e+06	5.28158e+06	5.92634e+06	6.91323e+06	6.28464e+06
52	94.0415	95.0487	2.00459	7.0629e+06	7.26288e+06	7.23642e+06	7.04637e+06	7.17082e+06	7.26454e+06	7.11754e+06	7.02114e+06	6.29236e+06	5.43444e+06	5.03903e+06	5.69803e+06	5.94987e+06	5.26993e+06	7.01198e+06	6.9208e+06	4.52583e+06	4.95852e+06	5.83414e+06	5.36994e+06
[truncated: 1,746 more rows]

## Sheet: Tumor ESI-
CompID	CompMW	MZ	Time	II_qc1	II_qc2	II_qc3	II_qc4	II_qc5	II_qc6	II_qc7	II_qc8	II_HFD_1	II_HFD_2	II_HFD_3	II_HFD_4	II_HFD_5	II_HFD_6	II_LFD_1	II_LFD_2	II_LFD_3	II_LFD_4	II_LFD_5	II_LFD_6
[truncated: 1,323 more rows]

[truncated: 2 more sheets: Liver ESI+, Liver ESI-]
